# Supplementary material for: Single-cell-resolution transcriptome map of human, chimpanzee, bonobo, and macaque brains
Source: HighWire-hosted journal article supplement (doi:10.1101/gr.256958.119), 2020-05-01
Supplement: Supplemental_Table_S1.xlsx [file Supplemental_Table_S1.xlsx]

## Sheet: conventional RNA-seq
Table S1. Sample information.
Individual ID	Species	Gender	RIN	Birth Date	Death Date	Age	Origin
CHB	Pan troglodytes	M	7.2	01/30/85	2013-01-08	28	Southwest National Primate Research Center (San Antonio, Texas)
CHC	Pan troglodytes	F	8.1	1981-07-06	2013-01-08	31	Southwest National Primate Research Center (San Antonio, Texas)
CHD	Pan troglodytes	F	9.1	1958-11-03	2003-01-02	45	Southwest National Primate Research Center (San Antonio, Texas)
BA	Pan paniscus	M	8.4	1994-11-01	2009-08-02	15	Lola Ya Bonobo Sanctuary (Democratic Republic Congo)
BB	Pan paniscus	F	7.2	2002-01-01	2007-01-07	5	Lola Ya Bonobo Sanctuary (Democratic Republic Congo)
BC	Pan paniscus	F	6	2003-02-01	2009-03-18	6	Lola Ya Bonobo Sanctuary (Democratic Republic Congo)
MA	Macaca mulatta	M	7.5	n/a	n/a	8.5	Suzhou Experimental Animal Center, China
MB	Macaca mulatta	M	7.5	n/a	n/a	10	Suzhou Experimental Animal Center, China
MC	Macaca mulatta	F	7.1	n/a	n/a	11	Suzhou Experimental Animal Center, China
HA	Homo sapiens	M	7.7	n/a	n/a	62	Chinese Brain Bank Center in Wuhan, China
HB	Homo sapiens	F	6.7	n/a	n/a	61	Chinese Brain Bank Center in Wuhan, China
HC	Homo sapiens	F	7.1	n/a	n/a	34	Chinese Brain Bank Center in Wuhan, China
HD	Homo sapiens	M	8.8	n/a	n/a	34	Chinese Brain Bank Center in Wuhan, China

## Sheet: snRNA-seq
Sample set information					Library information
Cerebellum					Library	Region	Sample set
Species	Set1	Set2	Set3		ACC1	Anterior cingulate cortex (BA24)	Set1
Chimpanzee	CHB19	CHC19	CHD19		ACC2a	Anterior cingulate cortex (BA24)	Set2
Macaque	MA19	MB19	MC19		ACC2b	Anterior cingulate cortex (BA24)	Set2
Human	HA72	HB72	HC72		ACC3a	Anterior cingulate cortex (BA24)	Set3
Bonobo	BA19	BB19	BC19		ACC3b	Anterior cingulate cortex (BA24)	Set3
					CN1a	Caudate nucleus	Set1
Caudate nucleus					CN1b	Caudate nucleus	Set1
Species	Set1	Set2	Set3		CN2a	Caudate nucleus	Set2
Chimpanzee	CHB37	CHC37	CHD37		CN2b	Caudate nucleus	Set2
Macaque	MA37	MB37	MC37		CN3a	Caudate nucleus	Set3
Human	HA14	HB14	HC14		CN3b	Caudate nucleus	Set3
Bonobo	BA37	BB37	BC37		CER1a	Cerebellum	Set1
					CER1b	Cerebellum	Set1
Anterior cingulate cortex (BA24)					CER2a	Cerebellum	Set2
Species	Set1	Set2	Set3		CER2b	Cerebellum	Set2
Chimpanzee	CHB5	CHC5	CHD5		CER3a	Cerebellum	Set3
Macaque	MA5	MB5	MC5		CER3b	Cerebellum	Set3
Human	HA21	HB21	HC21
Bonobo	BA5	BB5	BC5

## Sheet: immunohistochemistry
Sample ID	Species	Sex	Age	Hemisphere
HA	Homo sapiens	male	62	left
HF	Homo sapiens	female	63	left
HG	Homo sapiens	male	54	left
CHD	Pan troglodytes	female	45	left
CHE	Pan troglodytes	male	12	left
CHF	Pan troglodytes	male	12	left
ME	Macaca mulatta	male	17	left
MF	Macaca mulatta	male	25	left
MG	Macaca mulatta	male	26	left
