# Supplementary material for: Single-cell-resolution transcriptome map of human, chimpanzee, bonobo, and macaque brains
Source: HighWire-hosted journal article supplement (doi:10.1101/gr.256958.119), 2020-05-01
Supplement: Supplemental_Table_S2.xlsx [file Supplemental_Table_S2.xlsx]

## Sheet: chimpanzee
Table S2. Gene expression differences distinguishing humans from chimpanzees, bonobos, and macaques.
	1 Supramarginal (BA40)	2 2ary Auditory (BA22)	3 Precuneus (BA7)	4 Cingulate Posterior (BA31)	5 Premotor (BA6)	6 1ary Somatosensory (BA3/1/2)	7 1ary Auditory (BA41/42)	8 1ary Motor (BA4)	9 1ary Visual (BA17)	10 2ary Visual (BA18/19)	11 Cingulate Anterior (BA24)	12 Cingulate Anterior (BA32)	13 Prefrontal (BA10)	14 Inferior Temporal (BA20)	15 Insular Posterior Cortex	16 Dorsolateral Prefrontal (BA9)	17 Orbitofrontal (BA11)	18 Ventrolateral Prefrontal (BA44)	19 Amygdala	20 Entorhinal Cortex	21 Hippocampus	22 Hypothalamus	23 Thalamus	24 Corpus Callosum Anterior	25 Corpus Callosum Posterior	26 Internal Capsule	27 Globus Pallidus	28 Cerebellar White Matter	29 Substantia Nigra	30 Cerebellar Grey Matter	31 Putamen	32 Caudate	33 Nucleus Accumbens
ENSG00000136999	-2.89371	-0.309362	0.944551	-1.5689	-1.41141	-0.0680204	0.135201	-0.741004	-0.188527	0.462407	1.30598	-1.5254	-0.48458	0.821296	-0.219081	1.51588	-0.597258	0.711042	-0.233935	2.4432	-1.82555	1.35952	0.684352	0.747032	0.0566606	0.00677767	0.252937	0.723987	-3.32402	-0.0575555	0.239728	0.0567762	1.40511
ENSG00000134291	4.35214	2.05416	1.20981	-2.07199	0.837779	-0.38682	2.61941	1.75167	1.71398	3.54021	0.420882	-1.6374	-0.323591	-1.14909	-0.0568142	0.154495	0.192877	1.27187	-0.54079	-2.0267	-5.98316	-1.78588	1.85322	-0.769176	-0.225433	0.0497384	-0.156387	1.38416	-1.90017	-0.693019	0.543497	-2.10472	-0.0336844
ENSG00000174292	0.806787	0.341155	-3.49816	0.268912	-2.26721	1.1603	-0.292868	-1.44615	1.02947	2.64591	-0.456918	-0.488771	-2.02698	0.86308	2.71973	-0.931647	-1.29434	-2.83808	0.599442	-1.36262	-1.80869	2.27542	-0.621888	-2.28157	0.69404	-0.644885	-6.77723	2.68002	1.06765	-0.307844	1.22152	-0.56442	2.3958
ENSG00000111676	-1.76633	-1.03274	0.487493	-2.29755	0.544115	-0.597966	0.336917	-4.09579	1.04403	0.706408	-5.92872	-3.58361	-0.400905	-0.937617	-1.05109	-3.47842	-0.682197	-1.59228	-0.778945	-0.831543	1.97666	0.54815	3.18918	0.476503	-3.69559	-2.27707	-1.2557	3.90654	0.46846	0.041468	-1.14505	-0.782487	-2.62848
ENSG00000272398	0.25801	0.194626	0.267891	-0.248615	-0.881805	0.673475	-5.53805	-1.32459	-2.42114	0.534753	0.809521	-0.33451	-1.58826	-0.913896	2.66811	-0.362546	0.343318	-1.42465	0.893053	-1.72592	-0.00416846	0.538273	-1.70018	-0.385347	-3.82976	-1.70084	-0.322225	-0.635738	-1.08848	-1.29858	-0.151359	-0.907697	0.316952
ENSG00000197992	-1.37883	-1.44352	-0.918987	1.78498	-3.05574	-1.96049	1.19737	0.191792	-1.29744	-1.12069	-0.780239	1.07487	-0.0690223	0.147719	1.03525	0.807103	-0.8357	-0.074704	-1.36685	-1.15632	1.26557	0.92609	-1.04045	-1.01937	-0.884665	-0.921105	-1.59838	0.890983	-0.629695	0.400032	2.6206	-0.336057	-1.92032
ENSG00000103528	-1.35568	-1.57782	4.13015	1.33554	-0.350793	0.281449	-2.06211	0.18857	0.193967	-0.386902	0.646395	0.233564	2.16024	-0.2083	-0.279397	0.0566621	3.2751	3.34314	-1.15654	-2.54525	-1.23106	-3.71019	-1.65307	-1.12871	-0.605245	-0.178389	-0.121525	1.10629	-1.91665	-0.13373	0.483048	0.122977	-0.265317
ENSG00000100425	-2.39347	-0.835066	0.485206	-0.0872786	0.352569	0.0122399	-1.99059	0.302611	-0.981282	0.327341	-4.13567	1.36356	0.778312	-1.25073	3.97376	-0.206084	-0.669854	-2.02567	-2.36305	1.23638	0.792592	4.44616	2.16474	1.01537	0.625784	0.836863	-3.82313	0.629252	-0.203682	0.366574	-1.84683	-1.9528	-1.52358
ENSG00000160233	-3.86188	-3.32109	1.05434	-4.10204	-0.309029	0.0138917	-1.03532	-2.32411	0.843568	0.320486	0.274978	-0.91468	-0.615065	-1.50005	0.837895	-0.163053	-0.140057	-0.608044	-0.697594	-1.46465	-0.0991765	-0.682216	1.03257	-0.218267	-0.759001	-1.42678	-0.131628	0.303931	0.36488	-0.393833	-0.637457	4.5374	1.98544
ENSG00000099860	-0.571129	-1.94084	3.79318	5.0122	4.11974	2.03024	0.703946	1.22974	2.10742	0.642141	0.277083	0.528534	-0.265201	2.74828	-0.172206	2.82712	6.27767	-0.0183673	0.382906	0.739896	-0.522317	0.779098	-1.80323	0.308786	-0.350183	-0.925801	-0.142777	0.667059	-0.0977492	0.677815	0.803005	0.646436	2.12252
ENSG00000185658	0.131018	-0.457525	-0.0967509	-5.26769	-1.49446	5.71551	-0.0728108	-1.38653	-1.63797	-3.71689	0.458817	-5.27974	-1.34778	-0.778456	-2.16648	1.49007	-0.0807249	-0.107767	0.104406	0.065033	-3.49996	-0.686545	1.42162	0.691373	-0.0705015	0.803973	-1.34964	0.0215055	-1.13365	3.10632	-0.263076	0.487394	-5.14593
ENSG00000205221	0.742492	0.99777	1.83053	1.36002	-2.46585	0.3052	-1.8188	-0.127443	0.228957	2.82682	-0.254576	1.42215	0.552144	0.844927	-0.0318708	0.856893	2.10414	-5.23243	4.43047	-0.899363	0.377292	1.81758	1.63923	0.3138	1.26221	2.59945	-0.388669	-1.20318	1.24027	-1.49765	1.13334	2.8386	-0.0577533
ENSG00000197265	-1.08601	0.473844	-1.74142	-0.794421	0.128429	1.39182	1.68002	0.687331	4.48907	-0.416302	1.88161	-1.93951	-0.506241	0.136279	-1.17614	0.814484	1.9359	0.795331	0.143822	-0.0949201	3.55763	-1.77742	-0.207234	0.103816	0.147462	-0.0368024	0.721526	0.224056	0.596205	-1.2743	-1.04236	-1.275	-0.00216323
ENSG00000144401	-0.268896	-0.813112	-1.00146	-0.496261	3.76972	0.23306	1.0253	-1.36516	0.265543	-2.1002	-2.33301	-0.608957	-0.315448	0.262449	-5.30948	-0.642541	-0.122215	-0.75314	0.45946	-0.426055	-2.81698	-0.848267	0.295024	-0.517084	-0.515516	-0.265343	-2.35426	-0.11753	-0.989988	-4.55421	-0.562882	-0.0548	-0.030267
ENSG00000112812	-0.219214	-0.052213	2.11217	-0.376154	-0.653142	0.73331	1.46597	1.28773	0.755415	-0.389362	-1.21649	6.37201	0.418577	-2.21998	1.81864	-3.47242	2.18429	0.482199	-0.0651366	0.210769	1.14681	-0.473979	-1.65526	-0.164506	-0.336645	0.962549	0.489147	1.63304	0.382965	1.71839	-0.351105	-0.536138	-1.86563
ENSG00000144278	2.88187	-1.59412	-0.120092	-1.9608	0.654259	-1.81922	1.84617	-2.13421	5.9053	1.00118	1.20415	0.330964	0.881415	-1.75527	-1.43606	-1.09412	0.883544	-1.95416	-0.806909	1.0891	-1.80937	3.0469	-5.62697	-2.92722	1.77978	2.51861	0.82363	4.27823	-2.90885	0.251642	0.544754	-0.674381	-1.50851
ENSG00000115232	-0.996955	0.00730248	0.846189	2.77993	0.0496674	2.32919	0.113917	-0.760107	0.920173	0.769626	-1.03923	-0.934662	-1.2124	0.623921	3.39131	-0.934597	-0.185845	0.465668	-3.69016	2.76259	-3.35609	0.691807	3.14538	-2.41124	-3.19899	-3.23695	-0.26409	0.610328	1.01389	-0.317664	-0.263891	-1.03513	-1.13152
ENSG00000143420	-0.0149344	0.246494	2.29903	0.0925765	1.50619	-0.0543194	0.801268	-0.163623	1.91158	1.99355	0.881175	5.24278	-0.369372	0.369364	2.52309	0.121645	0.320493	1.37012	-1.05215	0.836088	0.5383	3.06579	1.42227	-0.496429	3.997	1.14714	0.328684	4.46689	-0.284096	0.827854	-1.89076	-0.966512	1.32827
ENSG00000118733	0.0104229	3.23862	-2.74019	-0.691538	-2.19755	1.21547	-1.24188	1.30279	5.20199	0.676223	-0.136373	-1.23216	2.3183	1.30761	0.776001	-3.29615	1.50825	2.47063	-0.540641	-1.71027	1.11559	0.983186	-1.58846	0.494492	-0.390563	-2.07291	2.1208	3.11927	0.901092	1.65539	0.656332	0.889536	0.436677
ENSG00000188452	0.238301	-1.5903	1.61774	0.383633	-0.0401777	-2.80647	3.61276	0.32192	0.14198	-1.55315	-1.43924	0.0520623	-1.67294	-0.721545	1.20238	0.0537273	2.95303	0.351799	0.390505	5.54215	-0.543377	2.74225	-1.0133	2.75292	-0.00284542	0.236439	-0.431792	1.81251	1.86988	-1.26061	0.0735097	-4.18857	-0.00394484
ENSG00000075223	2.89177	0.630643	1.91514	0.27582	-0.878731	-0.849585	0.214835	-0.11848	-0.41545	-0.478112	2.17977	1.02963	-0.210491	0.688329	3.30088	0.159204	-0.0223742	0.456288	0.0162056	-1.23702	1.52305	0.138704	0.673208	0.559631	0.955251	0.176138	-0.991949	1.29515	1.46993	-0.240799	-0.372643	0.112728	-1.38504
ENSG00000196091	2.04465	2.16523	2.05222	-1.08367	0.255682	-1.34627	-1.84079	-3.67783	1.62261	-0.42885	0.957436	-4.62597	1.15288	-0.736552	-1.16036	0.346099	-0.427524	-3.65791	1.05522	1.91839	-0.962599	-0.81989	-0.02311	-0.687894	-1.73693	2.17245	-1.18461	-1.48535	0.184889	-0.144048	-0.621048	0.240006	0.169465
ENSG00000164627	4.52167	0.217882	-0.272676	-0.200995	-2.7734	-0.061373	-3.81959	-0.00394705	-0.561211	0.880196	1.81954	-0.0911458	-0.773975	2.0149	1.54435	-3.35809	2.90063	2.14972	-0.0611528	-3.3117	-4.52288	0.234471	0.131131	-5.9768	3.22147	-1.18579	4.1018	0.364745	1.14493	-0.887989	-2.33735	2.14515	2.80313
ENSG00000109270	0.687628	2.2193	0.331765	-0.723917	-0.38519	-0.243876	-1.09799	0.571951	0.419366	0.996199	2.14405	0.19835	0.787969	0.117905	5.13934	-0.659753	2.55035	0.340906	-0.323693	0.40371	-2.58712	0.861059	-0.650729	-0.915634	0.547324	-0.664193	2.9777	1.66584	-0.464159	0.179343	0.486821	1.02165	2.08317
ENSG00000171786	-3.76152	1.04573	-0.171133	-2.19375	0.449237	0.905057	1.14424	1.71666	1.72131	0.485483	-1.12029	-2.94075	-1.24732	-2.36347	1.36301	-3.46408	-3.03639	-0.264912	-1.13157	-0.489382	0.0831706	-0.848952	0.784955	-0.830932	-1.76611	3.29918	0.182729	-0.144109	-1.40278	0.105311	0.780384	-0.645887	0.851824
ENSG00000134294	0.385793	-0.234144	3.71322	0.617999	-0.550179	-0.32646	-1.54297	2.59407	1.20886	0.240974	-0.861312	-0.205865	-0.392714	0.184277	0.120272	0.645681	1.80347	-0.178887	1.91104	-0.176607	0.702475	0.633633	-0.396226	-0.211108	-1.53354	0.0104833	-1.33503	0.965617	-0.268479	1.58697	-1.51535	0.365722	0.763192
ENSG00000143171	0.182946	0.313996	1.24336	-0.131658	4.83775	0.83797	4.23605	2.04654	3.76943	1.86542	2.16486	1.56919	1.47383	0.703139	2.14783	0.605042	1.53955	0.207289	-1.99015	3.92875	0.798841	0.190183	-0.0875877	0.169951	2.08782	1.09692	-0.923301	0.874176	0.163001	3.06648	0.509595	0.260863	-0.319223
ENSG00000154813	-1.21165	-2.44716	0.358319	-0.385172	-0.972706	0.926197	1.61611	1.89743	2.13163	-0.424908	5.27794	1.27811	-1.53701	1.95492	0.00921902	-1.97643	0.575976	-1.2125	-1.98366	-1.10482	3.64847	0.212572	-2.70093	0.187787	-0.294915	-0.94488	-3.09643	4.70065	3.85453	0.532574	-0.436859	1.96771	-0.547146
ENSG00000165487	-2.5434	2.78213	1.30502	0.00798347	-1.37766	1.59725	-1.12997	-2.46588	-2.89575	4.92702	0.343932	1.99483	1.88598	-1.48611	1.35033	1.05385	1.06321	0.844189	2.81445	-0.288636	-1.82607	1.1029	1.92805	1.01879	2.09399	0.69115	3.40127	-0.937338	0.736685	1.19046	-0.0801639	-0.282538	1.08151
ENSG00000151164	4.88945	-0.246111	3.61532	-0.434662	-0.0635079	0.721694	-2.50453	-0.681543	0.419751	4.01504	-2.60719	-1.5224	-1.68382	-0.268877	0.436653	-5.10163	0.0960764	0.506363	2.0751	-0.973146	-5.1231	1.06052	0.504553	1.27661	-1.80789	-0.687859	-1.30554	0.250716	-0.715793	4.72921	0.296862	0.934861	0.47236
ENSG00000182272	-2.5885	-0.863997	-1.46969	-0.0363235	2.00965	5.64662	0.684139	0.751111	-1.53147	0.762998	0.195659	-2.52313	2.1898	-5.15119	-0.0890195	-0.23556	-2.56106	-0.566909	0.837065	-3.07073	0.00695752	1.09357	0.148475	0.63415	1.38661	-0.456076	-1.76898	-1.45742	-7.09049	-0.782549	-1.57533	1.60795	1.89872
ENSG00000127564	1.32648	2.96	2.12218	0.374251	2.33268	0.91569	1.7274	-0.0534777	-1.09964	2.4111	3.99225	-0.379008	0.0677062	2.68889	1.27115	-4.49073	0.0392761	0.100682	-2.27932	0.411271	1.52094	-1.96942	-1.53615	-3.5452	-0.970269	-3.06851	-0.652718	0.27179	-5.30578	-1.74226	-3.02161	-0.169044	-0.00957286
ENSG00000141506	-1.33926	6.32757	0.942594	0.115808	-1.97051	0.615363	-0.163876	2.50816	-1.26512	0.109626	0.756453	-3.01646	2.48992	-0.348706	2.96208	0.220762	-0.475562	0.729089	-1.84517	-0.066694	-0.102263	1.92419	0.853437	1.93513	-0.589283	0.31093	-0.2445	2.10331	-0.261881	0.149086	0.0432743	0.0883414	1.99339
ENSG00000155229	4.18438	-3.08761	3.71983	1.75817	-0.164587	-2.96628	-1.16888	0.280043	-0.298261	-3.0306	2.36377	0.026604	-0.780386	-1.00508	1.27037	-0.626622	-1.40943	0.419703	0.682326	-0.604909	1.96832	-0.302944	-1.19786	-0.47316	0.644257	0.501599	0.673779	3.37153	2.41952	1.501	-0.0715216	0.311846	-1.24005
ENSG00000138101	3.28919	2.5221	2.39112	-1.24021	-0.77331	-1.2875	0.425355	-1.50204	0.0825729	-0.965675	0.558834	2.25142	1.03192	-3.75527	3.17488	0.992048	0.844328	2.29239	-3.58992	-1.23706	0.647638	-0.333101	1.24872	1.11213	0.649145	1.84634	1.05668	1.82067	0.993899	0.578973	0.191365	0.20124	-1.30167
ENSG00000168081	3.16813	-0.225496	1.33247	3.51898	0.636443	0.935161	-3.41565	0.794589	0.150788	2.22764	-1.56726	-1.67733	-1.20704	-1.56309	2.31186	0.549893	-0.943238	0.0738361	1.8678	-1.8795	-0.252344	0.154803	-0.572341	-2.3993	-0.839992	2.16002	-1.13565	1.04355	-0.0991123	2.23689	0.198158	3.40101	0.448347
ENSG00000164120	-1.04064	-0.0101264	0.496103	-0.404342	-1.15769	0.0807564	-0.280206	1.53113	-2.86248	0.0797766	0.693256	0.680125	0.0834259	0.754791	-0.999336	1.49188	-0.0686715	-0.305291	-0.122677	1.14077	-0.478245	-0.85991	-0.468343	3.87128	-0.592564	3.74439	0.278284	0.859565	0.96104	-0.717602	0.14776	0.638254	-2.29119
ENSG00000116132	0.768045	1.67533	5.7404	0.94537	-1.13674	-0.407933	0.796785	-0.428944	3.94779	2.0354	1.97525	-0.186819	0.679435	-2.66614	2.63629	0.830103	0.905694	1.68308	0.179095	-2.25696	-0.113832	1.59203	-2.6058	0.257971	1.1666	1.2777	0.73765	0.473785	0.108271	1.27783	0.312955	-0.403031	-2.57272
ENSG00000180488	0.443194	2.77399	-1.4414	-0.193481	5.57613	-2.07741	-0.699732	-1.75195	-3.66653	1.8988	1.02896	-0.0960935	-1.5255	0.637091	0.444351	0.277823	0.94087	-0.0173002	0.0229832	-2.72688	2.68387	0.851233	-2.26206	0.477929	0.20472	4.50015	-2.83322	3.18519	0.293964	4.52978	-0.667656	-0.790829	-0.778342
ENSG00000153132	-5.93998	-1.09754	1.80117	-0.552845	-0.339513	-1.81613	0.320544	-0.711674	-1.94821	-0.159556	3.94099	0.88947	0.798863	0.052861	-0.3436	4.06196	-0.462759	0.76047	0.639584	-2.11469	-1.00102	-0.905504	-0.190959	1.17193	2.16854	-0.085161	3.3788	5.17444	0.118706	-0.377739	-0.146005	-0.11336	-0.523537
ENSG00000143412	-0.303109	2.29858	-1.43783	1.2291	0.990748	-2.16364	-2.55795	2.25862	-0.221991	-2.95162	-1.14195	-0.772057	2.79471	-2.25959	-1.22857	-0.844891	-3.1229	1.06419	0.339873	2.43661	-0.0512814	1.31775	-0.233062	-4.2619	-4.45429	-5.30228	-4.58149	-1.10155	-3.31514	-0.518057	-0.286474	-1.71764	-2.47771
ENSG00000187260	-0.000285286	1.95739	-0.777948	-3.0988	-0.780613	2.89494	0.45813	0.920796	1.04087	0.8242	0.793499	-3.3411	3.85433	-1.30646	0.00223429	-0.953856	-0.937296	3.47842	-0.956319	-0.327705	0.411662	2.9171	0.802038	-4.33708	-2.56296	-1.34755	-1.43018	3.03284	2.06913	2.09682	-4.59684	0.97596	-1.12422
ENSG00000179859	0.962392	1.30546	0.293787	0.0708498	1.05371	-1.75496	-0.12591	0.698876	-0.815854	-0.294187	1.42485	-0.875076	-0.256058	-3.98207	1.08413	3.81696	-0.919534	-0.911966	0.564957	0.65024	-0.867943	-0.0525451	-1.06716	1.93222	-0.366722	0.0370167	0.402303	-0.180922	-0.480633	1.70604	2.61767	3.73567	-0.418409
ENSG00000166402	0.930817	5.78612	-0.210003	-0.257073	-0.654518	3.50739	0.526609	-2.59654	-1.37911	-1.0723	3.09033	-0.986293	0.336423	0.300353	0.110351	1.97713	0.376003	-0.298323	-0.480891	-0.427898	-0.194908	-0.601591	-2.23475	-0.611765	-0.107357	0.497563	-0.00810803	1.75215	-0.874318	0.616361	-1.3283	0.27738	1.07525
ENSG00000170043	-1.96082	-3.54485	-3.64354	-2.50963	-0.696198	0.793563	0.01062	1.43973	-1.16826	1.18912	0.0133492	1.51847	4.84993	0.749483	2.59382	-1.12688	-0.1249	1.23832	0.224295	0.576988	1.9784	1.17807	-0.109822	-0.588115	-1.09245	-0.752232	0.0423756	-0.63448	-0.873089	0.669731	5.49221	-1.05731	-1.81505
ENSG00000101638	-3.79042	-4.07427	-0.941519	0.0431341	-0.385321	-2.01198	-2.03524	-3.02605	0.147128	0.242693	-1.11849	-2.65392	-0.548774	-1.01859	-0.114674	-0.315064	-2.69911	-0.937071	0.986549	-0.972855	2.07226	-0.182259	-2.03568	-0.478326	-0.685141	-0.179774	2.59204	2.76114	-0.670352	-1.45573	0.312733	0.590931	0.407235
ENSG00000128313	-0.876258	-0.979742	-2.87726	-5.04539	-0.562531	-0.941959	-0.922828	-0.947027	-1.26962	-0.422755	5.12511	2.21442	0.29361	0.319261	0.39993	0.986808	-0.459703	0.139044	-2.83546	0.699214	-0.0782815	-2.30459	0.12706	-3.64648	-2.30996	-0.293918	-0.379265	-0.152281	0.277162	0.365385	-0.345768	-0.530885	-3.54027
ENSG00000170037	2.77197	-0.663292	0.414827	-1.32995	0.243633	-3.01322	1.82518	-2.63712	0.114525	0.623171	-3.40951	0.574447	0.767677	0.105298	-1.95158	-2.54885	-3.9355	-0.466872	-0.391728	-2.58663	0.822172	-0.849567	3.73219	0.982483	0.474008	-2.50948	-0.511454	3.57891	-1.04572	-2.41062	0.0458842	0.816061	-0.0553271
ENSG00000172986	-1.05566	0.0557596	-2.90466	1.94768	0.229178	2.90519	-4.58668	-0.0234726	-0.632376	-0.052072	-0.141424	-0.0163164	0.622921	-2.70055	1.26996	-0.506376	0.730309	1.10557	0.630103	-0.996889	2.00805	-0.776836	-0.719124	-0.0415357	-0.609153	-0.848497	0.0898611	1.15237	2.59319	-3.25868	-0.410763	-2.02176	0.454465
ENSG00000168502	-0.885809	-2.43764	2.07857	1.83549	-1.79016	-2.21138	-1.17796	-0.421049	2.98692	1.1645	2.01322	0.132474	2.54186	-0.351347	4.55199	1.21827	-0.558828	-1.0361	5.22033	-0.368874	-3.07077	-3.19658	-0.486071	2.21229	0.834375	1.431	0.56349	3.29456	1.4866	2.8931	1.39432	3.82395	2.20146
ENSG00000142676	-3.41577	-0.380673	-2.08495	0.378481	-1.88339	1.49239	-0.958006	0.342848	-2.34663	-1.75991	-1.14708	-1.98342	0.353301	-0.951256	-0.380579	0.0169572	0.396318	-0.835873	0.0677474	0.65219	-1.21198	2.62173	-1.63666	-0.460312	-0.129831	0.6167	-0.79737	1.19206	-1.46978	0.998419	2.04034	1.51501	0.146213
ENSG00000079150	-2.83071	1.32411	0.135282	0.547984	-0.894888	1.07765	0.278449	-3.9078	1.15702	0.690467	-0.25153	-0.941782	-0.317247	-0.110254	-0.76219	0.452559	0.0232782	0.0178125	0.459255	-1.53745	-0.308317	-0.697272	2.11614	-2.3004	-2.59777	-0.817646	-1.06848	0.163531	1.10098	-0.156751	0.605366	1.07598	0.84115
ENSG00000105989	0.404224	0.262772	0.525633	-0.799091	-1.29958	1.32712	1.17587	0.0343107	0.141503	-0.336182	-0.523475	-1.26802	2.10106	-0.0860494	-1.17245	-4.10739	2.42421	0.671497	-1.45428	-1.80136	0.711667	0.260465	-0.848396	2.58335	0.164993	1.98099	-0.579619	-0.554662	0.264472	-0.818983	0.666666	2.17764	-3.7339
ENSG00000111696	0.542936	-1.14187	-2.66599	-0.472279	-4.78326	0.650414	-0.113588	-0.151662	2.78954	0.581655	-0.646823	-1.2608	0.0399302	0.598761	-2.13099	1.51436	-0.121996	-0.773711	0.720061	-0.892705	-0.138645	-1.81473	-0.499584	-0.104082	0.564465	-1.52401	-0.729846	0.666577	-3.01207	0.440992	0.12064	-1.50821	-2.51035
ENSG00000118600	-0.11122	-3.8348	-0.575996	0.206576	-0.461225	2.72106	-3.05864	-0.705084	1.20927	-0.291119	0.027922	-0.598366	-1.90219	-2.86164	-0.371161	-0.0513229	-2.38845	-0.716038	-1.29557	-2.44638	0.690494	-1.97433	-1.27165	-1.85748	-1.35997	-1.52773	-1.8118	0.522696	-1.2238	-4.20381	-0.71522	1.10278	-0.364719
ENSG00000138363	0.593287	1.75011	0.165713	-0.412999	-0.0842108	1.19212	2.44232	-0.886151	-0.339833	-0.493624	0.0730641	-0.053256	-0.192007	2.15369	1.31277	0.398288	0.922877	2.17971	-1.54869	0.323539	2.00922	-0.462233	1.49129	0.74607	0.493897	0.516377	-0.00459018	1.68532	0.0464444	2.59612	-0.735768	0.841204	2.95357
ENSG00000135835	1.15895	-0.191987	-2.3489	0.488277	0.24992	-0.269881	-0.644113	-0.908281	0.509967	-1.70258	-1.21627	-2.26946	-1.33908	-0.485999	0.171139	-2.91475	-0.77173	-0.426539	4.15534	0.123595	-0.431135	0.307166	0.665375	-2.39258	2.79942	-1.25409	0.207188	2.12992	-0.539399	2.35836	-1.04401	0.0714816	-1.00179
ENSG00000184363	1.0854	0.768622	0.959464	0.238887	2.34395	0.100725	1.70518	-0.246149	0.716444	1.48007	-1.20301	0.984331	-0.0124187	0.402277	-3.3462	6.11008	-0.67784	-0.00326743	0.17835	-1.2013	0.448748	0.119582	-1.21549	-1.07917	0.961778	1.54438	-0.280092	0.374043	0.076234	-0.812946	3.00714	1.9385	4.92986
ENSG00000151067	-2.2441	-3.4273	5.24036	-2.43652	-0.295593	-2.52718	-0.925595	3.99442	-1.41261	-0.699679	3.25687	1.221	0.679467	-1.81292	1.04563	-2.24206	1.13365	-1.66335	-4.09851	1.62668	-1.42173	-0.519871	-0.829369	-0.524587	0.313745	-0.469243	2.72531	-0.289452	5.7288	1.99468	0.815947	1.14391	-3.07137
ENSG00000062038	-0.961498	1.58729	3.03497	0.591582	-1.84644	0.680005	0.614043	-1.61752	-2.64279	-1.09052	0.723376	-0.248875	0.976092	5.72391	-0.0472244	-0.7477	0.950038	0.516629	3.0632	2.18886	1.46513	1.14702	1.31917	-0.531691	-2.24992	-1.67249	-0.307404	-3.47634	-0.0182225	2.57386	-2.46398	-2.48907	-0.231724
ENSG00000100320	3.78307	0.28578	0.630444	0.274429	1.23636	2.03918	3.32807	-0.318596	1.61151	-0.530524	0.461073	-0.364047	-0.0750769	2.26671	-0.209721	1.01778	1.30395	0.757775	0.268299	-0.567243	-2.12953	0.910917	-2.35622	-0.344409	-0.510828	-0.441601	-0.0255211	2.76233	1.16309	2.56497	-1.43592	-1.3401	-0.267106
ENSG00000174776	0.368575	-0.13071	-0.719556	-0.134266	-1.76532	-1.36373	1.32456	4.2742	-0.426267	-1.58674	-0.147751	0.678883	1.84295	1.53664	0.610072	1.64997	1.2717	-0.0543681	0.159218	2.70428	3.23489	0.436777	2.7691	4.46352	0.164812	-0.191277	-0.444534	0.0906269	0.2016	-2.22002	-1.04311	-1.65517	-2.82185
ENSG00000114204	1.07691	0.135805	1.94643	-0.0774842	6.79383	-1.46208	-1.64874	2.35645	0.494598	-0.360209	1.45485	1.27174	-2.27243	-1.03672	5.83807	1.36032	-3.16578	-0.352349	4.29162	2.47472	1.32903	2.05967	4.67935	1.34509	-3.04424	0.570155	0.0996637	0.787585	4.22494	-0.396225	2.64261	5.1762	-1.84905
ENSG00000112320	-2.3825	-2.19675	-0.0916528	-4.45912	-0.767919	-0.291178	0.360868	-0.706804	-0.0488217	-0.988073	-2.69417	-2.09773	-2.1601	-0.541307	-0.506789	0.22481	-0.0658839	-1.58511	-1.57108	-0.896117	-3.86243	0.438277	0.392885	-1.60247	-0.867201	-2.91072	-0.966193	-0.463244	-1.78256	-3.26974	-2.68283	-3.50327	3.26421
ENSG00000007933	0.483907	-0.209494	1.4693	0.209299	-0.0312628	-0.0085554	-0.178683	0.146457	-0.620341	-0.509737	0.080646	-0.27034	-0.200524	-2.00006	-0.0794284	0.106029	0.223489	-0.0743542	0.108037	-0.100131	0.269481	-0.158676	0.207601	-0.77843	0.0242087	0.112979	0.00490441	0.652779	0.28745	-2.20862	0.169894	-1.05313	-0.189965
ENSG00000175707	-1.73182	-0.411554	-0.612295	-0.0596666	-0.498556	-0.601052	0.98874	1.04742	-0.786649	-2.02017	2.69543	2.34846	-2.08609	-3.3013	0.347856	0.230712	-0.86043	-1.11887	-0.4723	1.61388	-1.24617	-0.998817	-1.95004	-0.589764	-6.19984	-0.602639	-0.265274	1.51393	-1.69912	0.553415	-0.861715	0.628616	-0.322965
ENSG00000144152	-1.32279	-5.65656	-5.83829	0.551403	-1.06004	1.00083	-0.280732	0.805213	0.0509505	1.38161	-0.556666	-1.69079	-2.78041	0.0304891	-3.05372	-0.460656	-1.18388	-1.47203	2.45442	-1.02246	2.49887	1.78054	0.420059	-1.73569	0.856705	1.46518	-0.35414	-0.939956	1.09342	0.257578	-0.544636	-0.160969	-0.416346
ENSG00000120539	-2.00387	-0.190791	-2.08662	0.309837	-0.719048	0.329095	-0.685652	-0.570842	-1.07066	2.7991	-2.19009	2.87413	0.830382	3.04962	1.54426	-0.369214	3.50113	-0.336293	-1.56168	-3.98533	0.217909	0.0444321	-0.313971	1.18113	1.03997	2.21776	-0.437636	1.01751	3.08269	5.44525	0.160103	2.0838	-0.450717
ENSG00000204220	-2.40525	-3.37687	0.223163	1.2537	-0.883564	0.496393	0.034066	-0.16942	0.428761	-0.0537294	1.86709	2.56493	0.874245	-4.32293	-1.74959	0.42318	2.35807	-2.84162	-2.9731	0.685325	3.58213	0.296572	-0.533845	-0.244305	-0.26246	0.0629768	1.11456	2.49399	-0.309236	1.02996	0.133259	1.64337	2.4017
ENSG00000146670	1.75265	2.44856	0.153369	0.403828	1.43844	-0.306707	1.50264	-0.378793	-0.580992	0.25152	4.07784	2.76071	1.33673	0.917855	0.411213	2.38806	4.35991	0.48817	-3.60542	4.24515	0.724985	0.558406	1.10702	2.29809	4.76965	1.43361	6.69497	0.996247	1.38177	1.71801	-0.63339	0.28923	0.0578021
ENSG00000188827	-3.67406	-0.255251	0.872482	0.192997	-0.24865	0.582887	0.657619	-0.0702686	-1.64571	-0.0582328	1.06356	-0.110719	-1.86119	-0.483875	-0.757773	-2.02127	-1.24325	-0.33529	0.158737	2.30308	-0.458936	0.207677	-0.226683	0.415874	0.598491	-0.0361857	-4.78071	2.43909	-1.9475	2.16007	2.33607	0.118957	-1.18786
ENSG00000169427	-1.96069	3.66723	-2.61706	0.126356	0.779887	0.222495	-0.929255	1.15043	0.248454	-1.11663	1.74832	1.73298	0.326611	2.84209	1.62322	-1.31842	2.98146	0.690493	0.618418	0.862569	-0.136807	-1.75973	-0.300277	1.16159	0.123663	0.695692	5.56734	3.88054	5.25961	1.40846	-0.155236	-0.20559	2.19985
ENSG00000088854	0.0102264	-0.0772118	-0.524875	1.56834	3.20656	0.683241	-2.8188	-2.28366	4.81793	0.391532	-1.4801	1.66702	0.769893	0.283349	1.52579	4.76235	0.192058	1.14759	-0.640883	-0.686679	4.59988	2.73016	-2.14883	-0.353814	0.696906	0.707723	-0.396476	3.03111	-1.12944	0.203864	0.29409	1.25308	0.494745
ENSG00000181085	-1.51626	1.45645	-0.54939	2.29941	-1.62024	-2.44339	-2.66605	3.0906	-0.0726375	-1.93218	-0.853445	-3.51674	-1.60393	1.2688	-1.24973	-1.37164	-0.821185	-0.369143	0.203072	0.628646	-1.96699	-0.166027	-1.52647	-1.38627	0.885828	-3.72547	-3.01332	-1.6509	0.0326027	-2.78629	-0.166009	-1.2898	-2.61057
ENSG00000068878	0.0937069	-0.453227	-0.69506	0.250333	-1.81607	-0.564846	-1.581	-1.38038	0.571542	-1.47584	-0.605874	1.44324	1.46776	0.760017	2.28976	0.801268	1.59199	-0.093605	1.2906	-1.05591	0.734878	-0.85306	-0.411662	0.192891	0.62298	0.643909	-0.304443	3.2025	-0.141487	-3.44636	0.328357	0.97204	0.394866
ENSG00000100319	-3.25464	3.02313	2.58868	1.27424	-0.271372	3.36354	-0.21376	0.145258	-0.094979	0.504179	-0.0841486	1.01705	0.105666	-0.451826	-1.03186	-0.92171	-3.95532	-2.08795	0.926296	-0.219478	-0.032902	-0.328771	0.359215	-1.34375	-0.599909	-0.308973	-0.8555	-0.233341	-2.23721	0.689115	-0.603599	-0.280945	-0.976928
ENSG00000104427	-3.99714	0.831973	-0.905894	-3.22133	-1.20876	0.609494	-0.801627	1.98478	2.28598	0.475291	4.01727	1.8766	-0.293512	0.280434	-0.402814	-1.06356	4.05244	0.22159	-1.43159	-1.22639	1.88554	-3.54441	-1.07707	-4.18606	-1.50263	-0.0931488	1.32676	2.76946	0.786888	2.72947	-3.58521	-1.17385	-1.74809
ENSG00000156983	0.65029	-0.113411	1.31537	-0.257132	-0.0205958	1.27117	0.430967	-2.44773	1.53776	1.96516	1.59768	-2.61178	-2.78407	-1.25453	0.577915	-4.85501	2.58568	-1.55039	2.18163	1.4166	-2.23527	1.40921	2.37154	-1.13217	-1.04612	-3.26439	5.54148	2.70272	0.708213	2.34947	-1.99802	-0.666583	-0.263507
ENSG00000204842	-0.79946	-1.97915	0.963631	-1.31734	-2.04038	0.401534	-1.79168	-0.823976	0.241711	-1.26888	-5.54229	0.647643	2.33482	2.20138	-1.32923	-0.981855	-3.81849	0.33836	0.221373	2.16118	-1.36921	1.56344	-0.762179	0.450062	1.01632	-0.208614	-4.44175	0.313087	-0.0875585	-5.34536	-0.778806	0.129092	-0.0465745
ENSG00000180190	-0.102143	0.158572	0.871196	1.44821	0.0403863	0.138226	0.238577	0.00616079	0.646572	0.143836	-0.900212	0.216461	0.988199	-0.366946	0.18776	0.120867	1.37321	1.77308	-0.0730099	-0.275721	2.91401	0.207464	-0.198774	-0.905313	-0.368967	0.835328	0.474178	0.919445	0.297652	0.126887	0.491379	6.1631	1.41544
ENSG00000167553	2.21632	0.359723	-4.51314	-1.54167	-0.0434493	-0.954643	-0.332913	2.46098	-0.473115	0.576159	-3.12435	0.939436	1.46916	0.651418	-5.03286	3.57441	1.15017	-4.70864	0.15877	0.560409	0.387553	-1.67981	-0.15089	1.92246	0.337022	1.36962	1.68526	0.540967	2.15582	1.52763	-1.84498	2.4169	-0.370351
ENSG00000131378	3.59219	4.00154	2.40839	2.71608	-0.19133	2.39288	0.744201	-0.13661	1.33737	2.13206	1.12486	1.5294	2.98213	0.336805	2.01929	-0.0903911	0.810433	0.497767	-0.0739136	-1.54545	-2.23449	0.919686	1.88864	-0.216074	-7.35872	1.04654	-0.0489715	0.60077	1.11373	0.965131	0.782224	1.54475	-0.1354
ENSG00000134574	-1.33271	2.09342	-2.24302	-0.0529797	2.71033	0.859606	-3.45138	2.13563	1.25668	-0.48379	-2.94778	-3.8083	0.0899315	3.6463	0.517172	3.43121	0.96471	0.101894	0.941592	1.44687	-0.02066	-0.0356764	0.355625	-0.221753	-0.210655	2.88561	-0.746775	-2.78992	-0.0554452	0.0732618	-0.786148	2.70595	0.752041
ENSG00000134317	1.05447	0.0864924	2.03126	-1.42387	-0.332393	-0.640023	-1.17841	1.85497	0.103285	0.556452	0.0414584	-3.79219	0.244466	-1.10887	-0.333855	3.67446	1.81944	-1.77788	-0.965774	-1.12355	-0.963031	0.858805	1.85799	-0.988513	-0.655035	-0.734887	-0.384003	-0.00833553	4.07868	-0.4156	-0.0791439	1.62497	0.315846
ENSG00000244588	1.08723	1.88568	2.1626	-3.33968	1.40354	3.83588	2.64084	3.45822	2.75762	4.62444	5.88007	0.764293	1.95723	3.08771	1.03464	2.73175	3.2685	3.52764	-0.520448	2.28822	0.25549	0.714739	0.128477	0.246957	2.22652	2.54692	0.310899	2.49964	4.06443	1.14428	0.894965	-2.75832	2.97807
ENSG00000156219	2.55418	2.51653	-1.23479	-0.562873	-1.3756	3.26045	2.03798	-3.90834	1.00504	2.04006	-2.57853	-0.989459	-3.20882	2.20972	0.962066	-0.818407	-2.63782	-1.66368	0.249893	-3.41601	-1.73018	-4.63024	-3.348	0.890579	0.82644	4.35412	-2.51979	-2.19738	-1.76815	0.166904	-1.6619	0.135878	-0.100779
ENSG00000148600	-4.88697	2.14369	4.96931	1.2872	0.600601	0.308985	0.779746	1.38864	2.98696	0.210159	0.102927	0.23034	1.82881	1.12167	-1.48109	1.24624	0.944444	0.196614	1.08133	-2.81649	3.93559	-0.389473	0.447541	1.22164	0.261891	-2.3441	0.645219	0.00453623	5.07643	-0.0403561	-0.201817	0.490468	0.533382
ENSG00000137460	0.661457	-1.53749	-1.13498	-3.13125	-2.47847	0.143322	4.08669	0.406589	1.86551	-0.115059	-0.299193	0.454873	-0.692192	0.331307	-2.26981	-0.244867	-0.399799	-2.28726	-2.59641	0.851878	-0.349622	-0.535432	-6.60593	2.57857	0.441972	-0.0452221	-0.698917	-1.89571	-1.88915	-2.28785	-0.11784	-0.276565	-1.84193
ENSG00000104714	2.87565	3.90605	1.06725	1.4461	-0.150382	-0.840343	0.684036	-0.0650896	-0.590786	-0.775241	0.579912	1.36818	-0.280899	-0.811098	0.840492	-0.273949	0.657426	0.639837	-2.88152	0.910427	0.870751	3.52344	1.36773	0.765715	2.75853	0.202902	1.06251	0.00305502	0.994607	0.759316	-0.682949	0.620865	1.93941
ENSG00000196407	1.07332	1.04121	-1.03625	-2.14802	-0.409303	-0.0175929	0.886062	-1.0847	-0.911802	-7.38473	-2.39654	-1.26788	0.197977	0.292956	0.422536	0.282301	0.597023	1.92953	-3.33527	-1.40645	-0.332451	-0.0223434	-0.0842882	-0.0551789	-3.50988	-0.0515797	1.12033	1.4938	-0.272062	0.448847	0.182269	-0.736936	-0.232781
ENSG00000204954	-1.25366	-1.36179	-0.68873	-0.580957	-0.526635	3.40386	0.35033	-0.875068	0.673586	-4.51959	1.61875	-0.982377	-0.794883	-0.657967	0.531789	-0.511728	0.74595	-0.156198	-1.39951	-1.48684	0.829081	3.02608	2.2566	-0.177152	-0.278084	-0.149997	0.726852	1.19661	2.08981	1.76677	0.881774	0.725307	0.144664
ENSG00000123329	0.424611	0.146166	5.97269	0.381967	-1.54695	-0.0203344	-0.125691	0.482283	1.09729	1.8835	1.53236	0.509725	-2.58697	0.178947	1.6163	-1.21129	-0.529594	-0.294469	0.52117	-2.09683	0.670149	0.432595	0.42346	-0.577845	0.111168	0.955315	0.600009	-0.0201297	0.609415	0.485354	0.910507	-1.08061	0.707676
ENSG00000163075	3.31948	2.44127	3.23493	2.04167	-0.482018	1.47508	1.06237	0.659418	0.481258	-0.522028	-1.40552	3.979	3.09323	0.674771	-0.883417	2.988	1.43113	1.49781	-0.720791	-0.191272	-0.859145	-0.729562	0.354427	-2.6272	0.0418825	1.10685	0.812803	1.16458	1.8155	5.0306	4.66462	-1.04144	3.23628
ENSG00000001617	0.226991	0.132101	0.28032	-1.04398	0.00270675	0.335165	0.313395	-0.460146	-0.704894	-1.1506	-1.76639	0.200109	-1.24431	0.241259	0.475764	-1.68235	-0.350875	-0.0812077	1.74905	0.978045	0.831979	0.102508	-0.756125	1.17332	-5.17468	-0.0937759	3.36417	-0.448713	4.19526	0.0361941	-0.000712642	-0.102415	0.139127
ENSG00000166598	-0.684015	-0.89776	-0.985497	0.159802	1.48276	-2.44746	0.833687	-1.43842	0.655189	4.22602	-0.174695	0.547075	4.93691	-5.9232	0.159263	2.87223	-3.34751	-0.737682	-0.734767	0.267259	-0.423436	0.278282	-0.586639	0.549255	2.17629	2.88472	3.64891	2.82683	-0.278034	2.21946	-0.178777	-0.0628076	-1.58288
ENSG00000159445	-0.424532	-2.19279	-1.79324	-4.30758	-1.63124	-0.190144	-2.17684	-1.59328	-4.31179	-0.567734	-0.659898	0.370371	2.8847	-2.2634	3.3139	-0.31486	-1.19564	-0.388577	0.381255	-2.55289	0.468141	-2.13576	-0.334123	1.06657	-3.68234	-2.15423	-0.740474	-1.39198	0.148699	0.193921	0.0925897	-3.46161	0.592983
ENSG00000115970	-0.0460147	1.53433	2.15634	-0.343694	-1.8942	0.673038	-4.58606	0.518796	-2.10533	0.168007	3.24398	2.95891	-2.38843	6.21802	-0.624756	-1.9531	5.45313	-0.78747	4.13662	1.08446	-1.08646	-1.06457	4.50302	0.590226	2.80108	3.25223	-1.3338	1.48767	4.56068	2.32212	-0.563649	-2.58126	1.54553
ENSG00000071073	-0.658722	-1.24821	-2.69924	-0.863044	0.879965	2.44182	-4.2702	-0.443583	-0.655172	0.503568	-0.900126	2.96764	4.51962	-2.48637	-1.00576	-0.341819	1.33238	-1.57923	0.164752	-0.449186	0.0746706	4.01631	1.47298	2.76622	-1.80995	0.771381	-3.25055	0.435546	-2.56517	1.39973	1.18004	1.25055	1.3632
ENSG00000100983	0.482557	-3.15536	-0.624051	3.93452	-1.17367	-2.1872	3.80495	4.87982	0.758036	0.821492	-0.603175	1.70522	1.55954	0.143758	-0.655271	0.673171	-1.1626	0.605768	2.89191	0.843139	0.41974	2.00727	0.866588	1.54204	1.89171	0.012896	0.0989544	-2.99048	-0.20295	0.468523	1.45228	-0.30963	0.361111
ENSG00000164171	2.59295	-2.7381	1.48176	2.58176	-0.244908	-1.11321	-3.17289	3.82362	0.424035	2.42566	-0.244856	-4.89709	-4.29425	-3.70157	3.0712	-1.13478	-1.8141	1.00434	1.31361	-1.13221	-1.25002	0.356971	-1.55197	-1.01777	-1.11491	-0.977147	-0.282856	0.874952	-0.156444	1.01913	0.642891	-0.18406	0.657354
ENSG00000091622	0.0944101	0.118073	2.15831	0.117082	1.30415	1.22699	-0.623575	1.57844	-1.40857	0.365701	3.5183	-0.403516	-0.100316	0.489122	-1.62045	-0.481552	1.67642	0.125193	-0.395725	0.0117639	-0.184826	1.14693	0.0836421	-0.20735	-0.862723	-1.70445	-0.262367	2.33938	-0.197136	1.21683	0.616265	1.44861	-4.33822
ENSG00000116544	-1.23029	-0.391913	0.798448	0.0714328	1.92039	1.10102	2.23526	1.94517	0.0345224	-0.477316	-0.622796	0.208839	0.0338546	1.20651	-1.2164	0.68962	2.45992	-0.210274	1.10598	-0.468546	3.63239	0.394041	0.0804418	0.347429	0.643206	0.564784	0.58503	3.01941	0.485762	0.374162	-0.156843	-2.98183	-1.12165
ENSG00000120647	-1.87085	-0.468964	-2.60158	-1.0015	-2.90993	1.97414	1.32697	-1.30789	-1.44236	-0.10489	-4.49104	1.02056	0.0253927	-3.57539	-0.168972	-0.584078	0.443743	1.1523	0.986355	-1.33062	-1.69002	0.121124	4.98195	-0.0915464	0.611961	0.64034	-2.20254	1.78487	-0.316631	1.78139	-1.56251	-0.704511	3.39993
ENSG00000167216	-1.67639	0.957808	0.75367	4.26305	-0.432963	0.273512	-1.22478	3.65506	1.75737	1.57806	1.53498	0.480456	-0.00350528	-4.13153	-0.761992	0.571317	-0.887916	1.51937	0.777537	2.31631	0.887707	0.76996	-1.41439	-0.53552	1.32359	0.784907	-0.233828	2.33434	2.34888	0.621792	1.66345	1.77649	1.83862
ENSG00000164344	-0.649221	-1.11631	-1.52106	1.74455	-1.89608	0.517204	-2.82825	-5.81237	4.9786	3.57761	2.29293	-0.275617	-1.40336	-0.482516	-2.46718	0.503583	-0.233643	-1.58723	-2.04544	-0.920427	2.88897	0.75563	3.34651	-3.529	-2.93115	-0.769052	-1.25827	0.712566	-3.63828	-1.4899	-0.76566	-2.95256	4.01998
ENSG00000139083	0.345257	0.894715	-1.30742	1.3916	0.266154	-0.348622	-0.601277	-0.873503	-0.691194	-0.251664	1.82686	0.341781	-0.226607	0.111316	-0.0741693	-0.201813	3.56889	0.546534	-1.10398	2.38762	-0.366072	-0.195723	0.9149	-0.257226	-0.445649	0.989986	-3.26277	0.389314	0.905582	2.64993	-1.86943	1.18247	-4.19143
ENSG00000102678	0.299598	-0.528472	-1.25748	-2.63386	-2.94542	1.16364	1.74839	-1.45441	-0.420811	0.130337	0.905195	2.31613	0.547106	0.436115	2.21121	0.644814	0.470573	-0.41033	-2.17385	-0.682493	1.21795	0.218026	-1.08173	-0.624275	1.97369	1.83653	0.65824	2.40963	-0.466299	0.185109	-1.34061	-0.19245	0.0492365
ENSG00000125870	-3.69819	1.10178	2.20086	-1.03196	-0.65522	-0.600303	-2.36064	1.37171	0.776601	2.88523	-0.998491	-0.49335	-0.187844	-5.35879	1.26737	-2.54337	-0.00254479	-0.902129	2.6886	2.05111	-0.183117	0.00928335	-2.13555	-0.771213	-0.156512	0.237379	-0.35535	1.66294	1.0116	1.35939	2.16814	0.545136	0.489059
ENSG00000133101	0.131259	-0.574477	-0.807428	3.19911	1.92552	-0.108679	0.0697855	0.753961	1.06592	0.146314	-3.64191	1.56291	0.128217	0.208715	1.5205	-0.599478	3.66714	0.345768	4.29334	-1.00644	0.132745	-2.64217	-4.84458	-0.624502	0.468403	1.5256	0.632527	0.955212	1.94684	3.40078	-0.287743	0.651468	0.224004
ENSG00000132964	0.0806249	0.578434	1.48383	-0.598268	-0.499449	1.65394	0.581368	0.724411	-0.359278	-0.297715	-0.191751	0.635613	0.384409	1.64038	2.62266	5.45922	1.3982	0.655533	0.864489	0.665802	-1.05999	-2.31855	-0.536208	1.1678	0.814335	0.75237	3.3439	0.166067	0.654681	-0.521437	-0.243669	-3.07847	-1.19193
ENSG00000092445	-1.91397	-1.52786	-1.92941	-0.911239	-1.60308	0.623142	0.998039	-4.76219	0.0747859	0.183314	0.507212	1.54148	2.64091	0.873626	3.06665	2.65431	1.03373	0.059059	0.3497	-0.503645	0.272931	0.425163	1.15382	1.32533	-0.435387	-1.53626	-2.78483	0.561536	0.593165	0.301327	-0.32514	0.0342254	-0.197481
ENSG00000166501	1.96801	0.710371	1.94386	0.723277	4.95903	1.02937	2.56326	1.45905	-0.0278937	-1.13591	2.37881	0.85082	0.191102	-0.603218	0.0292762	4.72209	0.316364	1.11943	0.454397	-1.8637	-1.86032	0.235572	-0.957755	0.825299	-0.0917448	-1.72584	-0.585964	0.978007	1.57015	0.44223	1.52051	-3.84552	-0.064926
ENSG00000006611	-0.64047	0.962759	-1.66336	-2.22336	0.323187	-1.67815	1.51501	0.695109	-0.153579	-2.17092	0.977977	-1.45437	-1.61145	2.95266	0.466437	-6.92756	2.2443	1.25973	0.860643	0.0856328	-0.891534	-2.68128	-1.10962	2.39589	1.40003	1.42162	-0.706881	-0.814206	-1.59827	1.13485	-0.415493	-1.14634	1.90464
ENSG00000213199	-1.14772	-0.969838	0.29877	1.61118	0.758758	0.586306	-0.168826	-1.51597	0.712586	2.09242	-0.324378	3.39821	1.42418	-2.25561	-1.09877	3.88483	-0.142103	0.21077	0.486353	1.37622	-1.38426	-0.239018	-0.377287	0.439048	0.402876	3.35441	-0.0234043	0.791013	-1.72098	1.09453	-1.9504	2.05883	-1.01844
ENSG00000158467	0.357258	-0.869801	-0.625388	-0.940578	-0.573894	0.265753	3.87828	-1.16922	0.871931	1.35524	0.359314	3.10522	0.579295	1.22027	1.12854	0.294052	1.6153	-2.5816	1.76255	1.18419	-2.32454	0.108333	2.95858	0.40657	0.90857	1.40558	0.510347	0.449543	1.31758	1.9381	0.549526	3.01646	1.63007
ENSG00000183090	-0.946058	-1.61323	-0.936279	0.247395	-0.804501	1.72133	0.661575	-0.595673	0.65082	0.403834	0.21539	0.613046	-0.574937	-0.110429	1.21805	-0.644778	-0.672928	2.16709	-0.93375	-0.947417	0.303348	-1.60228	-0.449142	-0.407058	-0.738467	-0.302319	-0.407441	0.207782	0.66658	-0.48577	0.0894105	-0.299745	-1.59624
ENSG00000137154	-2.6089	-0.997072	0.0574947	0.170329	-2.25309	1.6718	2.28788	1.657	-1.29272	0.210859	0.350253	1.97376	-0.338543	-5.26233	0.00781567	0.682289	0.207372	-1.01303	-0.106143	0.232215	-1.53208	0.99501	-1.72338	-0.778484	-0.3239	-0.239713	-1.10528	1.13127	-0.956812	1.2139	5.83505	1.93469	0.515602
ENSG00000174640	-1.62149	-1.67241	-1.8463	-3.05686	-1.96475	-1.725	-6.508	-0.387037	-1.28421	-1.23083	0.354007	0.357136	-2.37061	0.712325	1.26038	0.689014	-1.16514	-0.0557494	0.449468	-0.680782	4.73597	2.46084	-0.791674	1.11216	-2.88538	1.04366	-0.021738	0.809699	-3.2371	2.9111	3.4431	-0.157092	-0.220971
ENSG00000125775	2.03839	0.427452	0.796455	6.29336	-0.493272	0.399198	-1.22675	3.13921	0.689586	0.722197	0.128154	-0.223815	-1.70507	-1.15141	-0.484976	0.17253	-1.97397	-2.61896	-0.178071	-1.98702	1.48272	0.718312	-0.410586	-0.0307716	-0.79637	1.08183	-0.517889	-0.212949	0.912901	-0.510153	0.811347	1.2276	0.420121
ENSG00000197747	5.93841	0.00961271	0.983423	1.14124	-1.6539	0.557104	1.05015	0.477991	-1.1918	-0.390078	-0.0161626	-1.01846	0.924831	-0.449334	-4.3014	-5.21072	1.733	1.61761	-0.559774	-1.21749	0.204724	5.86273	2.72945	3.89629	-2.2872	-0.383525	-0.747395	1.20821	-2.19273	-0.179896	-0.287212	-0.209011	0.125565
ENSG00000035115	-3.00405	2.10483	-0.734209	0.0237144	0.977622	1.10234	-0.960014	0.133299	-1.53158	-0.0796514	2.09665	-0.57194	-0.942291	-1.24165	0.150649	-1.69288	-0.79188	-1.09298	0.182857	1.21572	-0.132322	-1.59137	0.606525	-0.0128255	0.705774	0.469112	-0.570774	0.880406	-0.704463	0.617631	1.09424	-1.28843	0.187995
ENSG00000130475	-1.62896	0.788305	-0.271202	-1.37936	-0.732302	-1.5024	3.33039	-0.284877	1.907	-0.632674	3.16512	1.44908	3.08853	0.544778	0.644537	-0.405357	-1.45078	-1.37248	1.27565	1.04915	-2.94987	-0.330438	-0.256423	0.914778	0.82497	0.132896	-2.09477	3.12606	-0.760981	-0.568333	0.19951	0.475745	0.14899
ENSG00000078814	-0.695282	-0.647802	-0.297251	-0.230042	-0.978659	-0.602939	0.722085	-0.369742	-0.0459847	0.715027	-0.400719	3.66637	2.29708	-3.2471	-0.249727	-0.291694	-0.75429	0.629869	3.25044	0.849374	-0.693242	-2.80562	-0.670519	-0.0525687	-0.168071	-0.628869	-0.0990159	-1.75803	-0.0228917	1.01868	0.486292	2.6626	0.677624
ENSG00000108557	-1.99537	-1.67643	-0.540585	-0.533633	1.64317	-0.0512003	1.83692	3.01597	-3.28218	3.19236	-0.610884	-0.558456	-1.3516	-2.0027	-0.112207	-0.0714712	1.09495	-2.27718	0.66837	4.40635	-0.818407	4.84715	-2.03669	-0.436042	-0.81968	-0.0716538	-0.539533	1.162	-1.12736	1.61145	-1.7578	2.97774	0.604743
ENSG00000166794	-0.280669	2.14177	-2.91997	-2.98255	1.1229	1.09268	1.34633	1.65093	1.02846	-0.821344	-0.0839026	1.46461	1.03353	-4.063	-0.816695	0.499291	0.877654	-0.0652144	-0.169702	-0.345023	1.08909	-3.73844	-0.669123	-0.0544743	1.47464	3.26898	0.594222	3.70268	0.488665	2.36001	0.480807	-0.133399	-2.06123
ENSG00000111254	1.87349	-0.409607	-2.81176	-0.939535	-1.47303	1.70107	-3.68952	-1.72507	1.00089	-1.78979	-1.75264	-1.84567	-1.16688	-1.11457	-0.0110108	0.200561	-0.114753	-0.437636	-0.183924	-0.496947	-0.111145	0.165399	-1.20388	-2.13225	-1.96117	-1.19013	-3.36069	0.785788	0.00650551	0.928413	-4.22237	1.74513	-1.24511
ENSG00000104435	-5.5415	1.37523	3.21367	0.0791432	0.239525	-1.21309	0.189334	0.90764	0.970778	2.27231	-0.663722	2.82962	2.93408	-0.0619794	3.60754	-0.427181	-5.5877	2.06643	5.21939	0.679248	0.968101	-0.539131	-0.596162	-0.634368	-1.27922	-2.83953	2.37861	2.23132	-0.197893	-0.544312	-0.385264	0.460331	-3.16686
ENSG00000146122	-0.339704	-0.753274	0.777242	-0.204562	0.226373	0.710634	0.252094	0.83115	1.36667	4.54915	-2.9599	-0.362972	-0.639972	-1.05475	-1.12179	-3.82173	-0.40575	-1.01179	-0.432841	2.16623	2.12034	-3.04939	-3.11326	-0.229617	1.93765	3.09313	0.21425	1.00699	-1.37981	0.245426	-1.46133	-0.927558	-1.05578
ENSG00000065357	0.137197	1.87703	1.32172	0.620186	0.000442954	0.361288	0.754452	-3.23925	1.14844	4.71541	0.410811	1.29313	1.10779	0.120371	0.56065	0.34261	-2.67835	1.60624	-0.285692	-0.802385	1.23018	0.586918	0.90731	0.716497	3.03438	0.618742	0.306182	0.047559	0.484892	0.0299237	-1.58161	-2.39088	-1.53307
ENSG00000105298	2.27436	0.827236	-0.0511951	-0.733837	-1.23443	0.50677	-0.92934	-0.234585	0.759484	-0.971239	-0.461067	1.62894	0.895263	-0.425942	-1.23349	3.53835	-1.81567	2.19803	-0.642539	-0.365692	-0.172607	-0.975589	0.261852	-0.403269	-0.522216	0.544984	4.76625	0.0693969	-0.0423267	0.367679	-0.500426	-0.493934	-2.57945
ENSG00000137364	6.38897	1.11092	0.348615	-6.71915	2.94766	1.0487	0.0337569	-0.0299627	-0.227394	-0.804388	-1.73833	1.3936	0.0804941	0.144191	1.49209	-3.99157	0.304551	-0.0559691	0.0527438	-0.833955	-2.07288	-0.0843794	-2.12797	1.10601	0.331502	3.11124	2.687	-0.469046	0.272859	-1.5102	-0.341829	-0.507766	0.539377
ENSG00000010219	0.291488	-0.00589276	0.487207	-0.290945	0.214264	2.79987	0.952279	-0.179245	0.270278	-0.0448885	0.169866	0.479015	-1.04903	0.906775	-0.734204	0.802055	0.0748508	-0.274184	0.768888	-0.665679	0.223496	0.0103749	-0.00844668	0.122966	-0.270599	0.0922221	-0.372897	0.475752	0.194697	0.0937474	0.22496	1.36703	0.434933
ENSG00000132970	-2.08828	-1.64436	2.21207	-0.15714	2.25915	-2.4154	0.319645	0.395931	2.07609	-0.498667	-1.91821	0.87168	0.346995	3.32474	-0.344858	-0.47424	2.85963	-0.463419	0.721343	0.482575	-0.376835	-1.40915	0.542176	-1.42104	-0.226718	0.944685	-2.57747	0.651084	-0.657107	0.877659	0.125917	0.363617	-0.000138226
ENSG00000124493	-0.362749	-0.347779	3.38075	2.48295	0.458114	-0.921826	0.509752	1.00675	-0.451216	1.01069	-0.956377	2.08013	0.770863	1.03289	-0.0066445	-2.31807	-1.13673	1.25418	-0.30312	0.325193	1.77804	-0.172778	3.91188	0.975747	-0.523297	0.131191	-0.0739447	3.70721	-3.88514	2.7841	-2.62577	0.164112	2.18273
ENSG00000145451	0.32157	1.0656	-1.69222	-2.81795	-3.84314	0.640586	1.26465	0.858597	1.34456	1.17674	-0.827485	0.565296	0.648327	0.82044	1.16865	-0.935228	-3.38527	-0.700437	0.138828	1.18386	-1.21059	1.20408	-2.42614	0.230032	1.58482	-1.52974	-3.01129	-0.205765	0.91702	1.70845	-0.0358088	-1.34215	-1.87632
ENSG00000122591	1.15691	4.8436	-1.35118	0.425539	-5.26401	1.43013	-0.625753	2.52866	5.05896	1.31163	-1.41138	0.0215689	-0.753662	1.33774	0.303301	-0.361297	1.27173	1.03001	1.58114	-2.97193	-1.7563	5.04016	-0.250099	-1.05963	3.98698	4.59342	-2.81865	-0.642617	-0.462231	0.775034	-0.555369	-1.533	0.550653
ENSG00000234444	-3.5277	0.943817	-0.419455	-0.246656	0.84535	-0.168042	-1.90051	-0.0124436	-0.304422	-0.897409	0.734922	3.51313	1.73763	-0.372458	1.82252	0.133653	-2.92024	2.28083	5.64069	2.15481	-1.48648	1.40118	-0.350846	-0.348575	3.03835	3.34546	0.917907	-0.763799	0.355467	3.34762	-3.85466	2.80401	0.582378
ENSG00000111445	-1.12708	-0.609015	1.51281	0.0700222	0.46868	2.04517	-1.09913	-1.8895	-1.3051	-0.952857	-0.806219	-0.199033	-0.40191	-0.918821	0.0332331	-1.03152	-0.707818	1.84882	-0.224858	-0.741508	-0.38273	0.771887	0.843123	-0.439532	-0.151284	-1.13021	-0.453116	1.20087	-0.0550523	-0.0104309	0.623911	-0.565316	0.0391842
ENSG00000196367	-2.31539	-1.1578	0.676852	2.56005	1.60856	0.668898	-0.450345	2.0062	0.314748	4.53204	0.453201	0.21267	1.73115	-0.711523	-0.63067	-0.276923	0.091501	0.0639955	0.412564	-0.0437913	-2.98451	2.27749	-0.500274	-0.742832	-0.436732	-0.247761	0.640879	-1.01091	0.173428	0.56643	-0.568458	-4.7842	-0.980459
ENSG00000272636	0.661123	1.96017	2.92785	1.15654	-2.36479	4.07474	-0.983839	-0.631455	2.57915	3.99012	-0.579618	5.7288	3.34274	2.57951	-2.66236	1.67554	0.252105	-1.46856	0.640313	-0.630107	1.2157	3.38757	1.49567	1.006	-1.22764	1.52546	0.242044	5.19482	0.810927	-0.0484765	2.35856	2.34808	0.490357
ENSG00000116014	1.66729	-0.896699	2.62971	0.531032	5.99802	0.194259	0.0501357	0.516624	0.827161	1.0499	-2.69749	-1.17657	-1.91902	-0.586501	0.175639	2.89532	-0.242524	-0.124302	3.07922	-1.06683	-0.554792	1.12279	-1.60641	0.627719	-0.617615	0.244876	1.09178	-2.13163	-0.382419	-0.08364	-0.446761	-0.270683	0.249148
ENSG00000150712	-0.93789	-1.38085	-0.733427	1.74558	-2.17735	2.06919	-0.482319	-4.01971	-0.449485	-1.42765	-0.134108	1.39183	-0.470796	-3.40923	0.724159	-1.71626	0.379841	-1.80901	-0.362427	0.517404	-1.00537	0.206101	-0.219507	0.0235041	-1.3141	-0.0492485	-0.253485	-0.409858	0.290886	-0.781102	-0.689641	-0.0186012	1.75297
ENSG00000148604	-3.03573	0.100246	-0.68973	0.270681	-0.853627	-1.90006	-5.94158	-5.15692	-0.622184	-0.809815	0.807974	2.90144	-0.292918	2.97385	-0.869813	0.203672	-0.402425	-1.53049	-1.07793	1.52906	-1.31815	0.270211	-0.231752	-0.627953	-0.0737852	-0.488123	0.264278	-0.161755	-0.474648	0.249062	1.48269	1.2879	1.27777
ENSG00000159884	4.69236	3.22998	-0.173935	0.55578	-0.580105	2.65095	1.10876	1.78568	-0.111234	0.165574	1.44441	1.27432	-2.7464	-0.467294	1.28364	0.753584	3.30864	0.341157	-0.78842	-2.55184	-2.00121	-0.287239	-0.048657	0.454582	-1.54544	0.335276	0.309694	-0.448792	-0.0822624	-3.84061	-0.210169	0.901653	0.637976
ENSG00000107719	-0.387699	4.7579	-0.30335	-2.0761	-1.71085	-0.564702	0.195852	-0.0825883	-0.409954	0.225722	-0.472351	0.147124	-0.522302	-1.93895	1.60364	0.757577	-1.22704	-0.0787146	-1.50269	0.659053	0.723746	0.147199	0.774753	-1.73254	-3.25297	-5.90802	-0.0399875	1.24947	-0.569855	1.06253	0.602517	-1.90705	2.28704
ENSG00000189091	-1.34938	0.251209	-2.57036	-0.351059	0.339385	2.94108	-0.623721	0.695846	-1.6801	-5.72126	0.479715	1.06206	-5.25974	-1.44042	1.42833	2.78754	-0.118668	-3.94683	-2.48477	-1.35657	-0.855315	0.385479	0.847753	0.442999	1.85927	0.521863	2.6832	-0.548494	-0.41803	-0.948179	-3.3326	-1.36033	-1.68173
ENSG00000168952	-0.954671	2.182	-0.439328	1.49378	0.737163	0.983923	1.88027	-1.44535	2.15197	0.75876	1.01758	-1.77337	-0.78627	2.84672	-0.469495	-0.542151	1.81057	-1.16919	-1.87345	-1.50169	-0.663674	-0.326539	-5.09206	0.814529	0.739074	0.296966	0.050044	-0.741243	-0.810014	3.91562	0.298618	0.614654	-0.610193
ENSG00000137343	-1.63715	-2.0249	-1.70167	-2.00814	-1.32049	-0.313904	-0.995534	3.51128	1.29552	0.0706301	0.329721	0.0849575	-0.304391	1.10663	2.44432	0.20105	2.80231	-1.03613	0.145058	-2.83706	0.53338	1.05262	-1.11558	-1.35437	-1.91732	0.461586	-1.9347	0.534581	-2.12046	-3.96025	-0.687035	-1.37066	0.599943
ENSG00000124006	-0.16638	-1.24452	-0.499213	-0.260079	-1.20755	0.543336	0.761186	-1.02326	1.27867	0.957773	0.0997256	-0.974699	-1.53157	1.38911	0.0811943	1.21567	-0.933198	-3.40201	5.18003	0.842554	0.813364	-1.84192	2.08388	-0.81599	-3.99999	4.31142	-1.67608	0.708806	-0.975422	1.53822	0.0991981	-0.718716	-3.14943
ENSG00000013288	2.2241	-1.78823	-0.350556	0.29102	-0.831902	-0.326865	-1.20329	-1.13333	-0.610762	-2.00192	-2.74639	0.438246	2.47743	1.41887	2.14493	-1.76957	-0.0671074	-0.379726	0.485454	2.2144	3.08432	-0.174454	0.0399112	0.121069	-1.98944	1.40843	-2.14164	-0.16477	-1.09382	-5.85354	-0.0714839	-0.497965	-0.618559
ENSG00000158113	-4.24331	0.531014	-0.0759888	-0.450378	-3.92519	-1.13941	-2.04048	-3.83167	0.496669	-1.5739	0.887545	-0.325392	-0.242708	-2.08168	1.25559	0.24993	0.204256	0.506902	1.18979	0.901432	-0.289305	-0.710736	-0.276203	-2.23522	-0.188921	-0.00826235	-1.00522	0.232549	-0.707044	3.28884	2.17715	-4.8848	-1.24221
ENSG00000183579	-4.00769	0.140726	1.1789	0.273657	1.31029	1.95574	1.97438	-1.11046	-0.782627	-2.59957	-0.645679	-0.272155	-1.06303	-1.43975	0.673665	-0.933781	0.789611	-3.15084	1.4469	-0.244688	0.597652	-2.63285	3.11099	-1.17774	0.158431	2.92386	-1.31349	0.825417	1.91133	-0.379458	-0.587969	-0.663762	-0.824549
ENSG00000166979	0.794886	0.812428	-2.48134	4.94895	0.104507	1.9932	-0.457782	1.07405	-0.0164643	-0.512871	4.02364	2.18822	0.0749807	-0.643583	-3.02844	3.38019	1.37689	0.626405	-1.09536	-0.419806	-0.249493	1.9429	1.74803	1.06773	0.779241	1.53588	-3.82252	-1.86201	1.24183	-0.187526	0.693164	0.158057	1.75079
ENSG00000164181	-1.43126	3.07088	-3.88296	-0.255308	-1.42562	-0.724566	0.615421	1.16546	0.872472	-0.0315529	-3.19195	0.774195	-1.2104	-0.781286	3.92706	0.21117	3.15864	-0.982063	-0.367479	0.993471	-0.811475	1.29807	-0.130637	-1.41811	-1.93414	-1.54163	-3.08561	-0.903056	-3.41913	-0.264495	-2.29563	-0.915652	0.803248
ENSG00000182566	1.74837	1.53616	1.14731	0.0394179	0.0665508	0.279825	-0.545847	-0.419371	-1.76135	-1.97696	0.68548	0.433935	0.692265	1.45384	0.257248	0.889062	0.210722	-1.27253	-1.99622	-0.222087	-0.677373	-2.42802	-0.733111	-0.191424	-0.488972	1.48615	-0.731347	2.17242	0.778228	0.199975	-2.62813	-1.5076	-2.49993
ENSG00000129474	-2.40064	-0.316502	-2.1386	-0.800151	-1.76485	-0.0893076	3.39589	1.01557	-3.58961	-0.601496	-0.0888171	1.07672	-0.903878	-0.328966	-0.102648	-0.498363	-0.548708	0.419166	1.84562	0.431617	5.87083	2.84626	-2.26549	1.33658	0.492429	-2.11785	-3.37523	-1.44852	3.51468	-2.94216	0.291425	-0.0644953	-5.23977
ENSG00000173391	3.6811	0.674861	0.541622	2.0548	0.822071	0.11926	2.23858	1.94435	-4.25339	0.630936	0.388507	-0.93977	-0.0198433	0.41134	-0.034524	0.846614	0.465689	1.29268	-1.13442	0.100165	0.0281832	0.835389	1.71957	-0.531625	1.18528	3.28928	0.559509	-0.256756	1.58281	1.5722	2.98916	0.00692601	-1.39735
ENSG00000065802	-0.0342807	-3.2312	6.0415	-1.3142	-4.70982	-4.93398	1.368	0.95589	1.1019	3.1811	5.07243	0.680778	0.885141	-1.08644	-0.546898	1.83078	0.911725	1.76394	-0.697939	-1.4025	0.00412176	-0.54645	-0.668569	-0.617078	0.688145	1.51219	1.19155	3.93953	0.20156	-0.832191	0.934755	-0.725863	-0.0395229
ENSG00000144649	0.197641	-0.742969	-0.492165	0.947853	0.506713	-0.0536861	0.245715	-0.133372	-2.33822	-0.454781	0.235309	1.30078	-0.095338	-1.49115	-0.818873	-2.55956	-3.49095	-0.22771	-1.52325	-0.565854	1.12169	1.68322	-0.784009	-0.510565	1.70549	-3.00666	-0.112599	0.258353	0.403751	-0.20334	1.47886	0.0801086	1.16272
ENSG00000120937	-0.73598	-0.00342862	0.340114	3.96342	-1.35514	-1.92494	2.14338	-0.760243	1.90468	-0.446947	-3.21185	0.480032	-0.378548	-1.49841	-1.93599	-0.286777	-0.331874	1.12747	0.860264	-0.646443	-1.54246	-0.517968	0.483991	0.549615	-0.618598	0.245414	-0.226492	-0.555644	-2.27719	-1.66735	-0.884174	-0.368316	-2.7332
ENSG00000109881	0.0248618	2.83613	2.9084	1.00156	0.0965309	1.72806	0.53338	0.557549	0.939502	2.11127	2.62485	4.15951	-1.40558	-1.0877	-0.863264	3.53511	1.08028	-2.25895	0.636005	-0.549246	5.98543	0.413651	0.0577589	-2.25492	-1.59919	-4.81292	4.57136	1.46467	1.50832	0.597838	-2.6335	0.65776	1.40256
ENSG00000172059	0.796207	2.7762	0.0701412	1.90986	0.101461	-0.771055	0.530287	-1.62994	-0.639468	-0.310225	0.252183	1.701	0.293745	-5.75961	-2.76852	0.843892	-1.01627	0.325848	-0.20856	-1.55451	1.08923	2.93095	1.03081	0.178407	0.199476	0.524718	0.552035	1.78087	-0.214773	0.44859	3.47169	3.00145	0.523187
ENSG00000010282	2.28609	2.10732	1.32832	-0.00231365	0.248724	1.24345	0.180448	-1.18398	-0.0578784	-1.14028	-1.27085	-0.335345	7.7693	1.05922	-0.611158	-0.986331	1.52201	2.68698	-6.46891	-0.886912	0.430394	1.56372	-2.0494	4.31983	0.845171	-0.166411	-1.84966	1.82128	1.42082	2.67146	-1.95037	2.54407	1.73895
ENSG00000122965	-0.070492	0.0815306	0.312708	-0.805115	-0.343806	0.0978558	0.640292	0.251018	-0.411551	-0.3779	2.80882	0.491855	0.424529	-0.871044	-1.13798	3.5767	-0.438996	0.246936	-0.553176	-0.284528	-0.393018	1.02149	3.13795	-0.256602	-0.634352	1.27035	3.4911	1.45679	-2.02326	1.65244	2.72738	2.39423	-0.213397
ENSG00000153162	0.696644	0.188128	-0.82273	-1.32256	-0.677777	-0.457089	1.23559	0.620738	1.00154	-0.0989101	0.776815	-0.203437	1.04284	0.436343	0.26792	0.422898	-0.829201	0.568166	-1.25564	1.28339	1.28583	1.10831	2.2247	-1.23675	0.0111236	-1.81947	0.950873	2.22414	1.71379	4.03911	-0.116525	-0.33437	0.238997
ENSG00000181031	1.18917	1.30125	1.3607	1.90958	-4.73519	-0.0216098	1.90805	-2.4638	-1.55134	1.3474	0.794518	0.588756	2.96194	0.611705	0.28811	-0.927668	0.459417	3.99245	0.789649	-0.373106	0.171839	0.138305	0.117644	0.905219	-1.98096	1.48428	-0.786657	-2.87358	-3.8848	-0.301223	0.369325	0.50909	0.382922
ENSG00000115053	-2.88832	0.0208731	-0.885126	2.10715	0.331513	0.333162	-2.97098	1.03887	-4.12723	3.22112	0.701398	-1.20919	1.68997	1.31778	0.255315	1.6078	4.4661	-3.31974	-1.69062	-1.64115	-1.26715	0.576253	0.400267	-1.09283	-0.0371641	0.854393	4.6153	1.25913	2.83591	-1.11271	1.19197	1.38639	1.55302
ENSG00000101187	-0.845105	1.82442	-0.430913	-0.668973	1.01087	0.155173	-0.411261	-0.0330004	-2.32452	0.0524992	-2.38305	0.149187	2.63627	-0.102105	1.09056	-3.11343	-0.278099	2.48104	-0.814739	-0.0554909	-2.95753	-3.31049	-0.280665	-0.576239	-0.112214	-0.240493	0.160538	-0.463801	0.164106	1.57463	-0.294342	0.644728	0.685054
ENSG00000180921	-0.010109	-0.603332	1.74334	0.22128	3.00277	1.24266	3.02492	2.95585	0.537295	0.856329	-0.238472	1.225	0.130117	1.12028	0.985135	1.98699	6.90743	2.56177	0.44526	0.941732	-1.53155	-0.276547	0.634474	1.30874	0.55823	2.35887	1.44122	1.24016	0.100796	0.662858	-3.45202	-3.3007	-0.230275
ENSG00000172461	-0.373866	2.38443	-4.89634	-1.70772	-5.45677	1.37266	-2.38429	-1.2607	0.517645	1.88512	-1.44437	-0.0237257	-3.30353	-2.35201	-0.780212	-3.58253	-0.544157	0.448242	-0.866699	-0.0126321	0.152626	-1.3135	-0.405205	0.148989	0.75113	2.53095	2.34677	1.3621	-1.80588	-1.63251	-0.693342	-3.81272	-0.710239
ENSG00000165066	-1.25573	-1.10433	-0.81892	-4.89824	1.20259	0.113428	4.96444	0.458634	0.405148	-0.259306	-1.30677	-0.793517	-0.122574	-0.0358638	-0.499776	-0.369103	-1.78252	0.201981	0.22728	-1.95686	0.231496	-0.177945	0.344699	-1.28712	-0.755738	-0.608939	-0.0656527	0.0502933	0.791936	0.23314	2.57216	-1.01461	1.77441
ENSG00000096080	-1.61697	-1.96591	0.489081	0.489618	-0.637272	0.172131	-0.685833	-0.254872	-2.00846	0.0142461	0.940162	2.31844	0.510625	-1.68494	0.205275	-2.64188	-2.16958	0.325396	0.466542	2.37711	1.87531	1.08078	-0.741331	-0.617801	0.138251	0.408381	-0.02217	-1.8222	-0.601843	2.21183	1.42777	-0.298036	-3.03257
ENSG00000139190	-0.498032	-0.163423	1.24658	1.00105	-1.73238	0.292893	0.595434	1.17776	-0.621902	-1.75106	2.31654	3.24939	0.748886	-0.643193	2.71737	-0.428499	-0.472475	0.225645	-0.0968923	-0.565842	2.18293	3.11262	-3.0594	-0.482462	-0.778085	-0.0667587	1.24988	-0.793397	-0.105763	0.0831806	1.15409	-0.732741	1.56883
ENSG00000139910	-0.639405	-0.689449	-1.72537	-0.874068	0.751038	0.280352	-1.75917	-0.249489	-1.7683	2.55473	0.459537	4.32187	0.330316	0.460068	-1.29135	-1.40118	0.380293	-0.883513	0.127548	0.24192	3.10195	0.320193	-0.0779055	-0.51186	-0.564825	0.550497	3.76781	0.679509	-0.1383	-0.0606826	3.10381	0.867037	-0.543045
ENSG00000138316	-3.42975	-1.17291	-1.88392	-0.71232	0.448357	0.402336	-3.17566	1.93916	4.42554	-1.13253	-1.04541	-1.21679	-0.992275	-1.20209	-1.64809	1.55302	-0.600832	-1.68928	0.294541	0.101404	-0.807707	-1.65479	2.11072	-1.47814	-1.34039	-0.417544	-0.517163	4.3035	-2.8715	-0.385461	-1.5083	-2.44061	-0.0499053
ENSG00000172426	-1.0011	-0.504193	0.420809	-2.19288	3.30805	-0.139519	-0.0383664	0.59843	0.233423	0.132166	0.763292	1.16067	-0.580376	-0.06301	1.24101	-0.750369	-0.322767	-1.55813	-0.853318	0.32312	-0.388028	-0.182074	-2.37302	-3.84323	0.373078	-4.19156	0.387277	-0.755944	2.39948	-0.981212	-0.412377	1.10114	0.198868
ENSG00000114019	1.70738	2.66072	0.126651	4.40793	-1.12518	0.235943	0.159924	-1.27228	0.667312	-1.61292	2.05932	-0.306274	4.90745	0.359089	2.22655	-5.34585	2.45569	2.43021	-0.774569	-2.9309	-3.29364	0.363612	-0.704686	-0.328967	4.61643	0.573554	-2.06917	0.311474	-0.44464	-4.82479	0.938694	1.3499	0.682572
ENSG00000104695	-1.67973	-2.91191	-0.487986	-0.38188	-4.41177	0.136983	2.24242	-2.35742	0.662584	0.514173	-1.91608	-1.76898	0.0613663	0.309925	-0.29732	-1.03251	-1.24662	0.448018	3.29372	2.26847	-3.30056	0.148639	0.486264	-1.60612	-2.491	-2.06883	-0.401739	1.19212	-2.466	1.76232	-1.25452	-0.235966	2.63064
ENSG00000183386	-1.05929	-0.897795	-4.2723	1.75249	-2.55445	1.72104	-2.88372	-2.24756	3.11954	1.58836	0.859112	0.320036	0.338552	0.768074	0.175684	0.517392	0.563303	-0.165014	-3.98682	0.57432	4.56324	0.759974	5.27189	-2.94223	-3.23278	-0.943676	2.06079	0.76203	-0.149434	-1.02119	-0.391079	0.626698	2.87287
ENSG00000120675	-3.17031	-0.885439	-0.26611	-0.856222	3.81307	0.114535	-0.685303	0.583158	-5.14617	-0.509681	1.99294	2.19396	-1.32571	-0.339496	-1.01951	0.169565	-0.546996	-0.548929	-0.641981	-0.937864	-2.19667	-0.0902674	-0.301659	-0.865088	-0.965595	-4.57115	-2.25556	1.59402	1.02897	-0.839382	-0.245884	-2.5735	-4.16538
ENSG00000179242	-0.391415	2.06318	4.74961	0.394493	-0.73239	2.70229	0.692479	-1.91805	0.85766	0.986852	-0.0772011	1.02787	2.54571	0.826104	1.18896	0.713545	1.79005	0.398221	-2.58808	0.05676	-2.61614	0.971225	2.16022	0.0859892	1.81687	0.991559	-2.85387	-3.41668	-0.797216	-2.84038	-0.429976	-0.407632	-0.574746
ENSG00000171476	2.47365	-0.447235	1.30342	-2.00121	0.64609	0.330259	-1.22601	2.08713	0.235057	1.06758	1.90699	0.781007	-0.255149	1.15523	1.15524	-1.93411	0.77866	0.0593482	0.00430842	-1.02895	-1.98822	0.539353	0.917408	0.836187	1.42882	2.12043	-0.907005	-1.69967	0.131336	-0.320799	-0.785533	0.916065	2.38819
ENSG00000139193	0.284557	-0.499836	1.24778	0.769615	2.7094	0.290869	-1.20129	0.575387	-0.315885	2.75189	-0.342273	-4.03446	3.55507	-1.9253	-1.2846	0.976716	-3.18207	0.732399	0.750859	-1.55325	-0.198022	-0.114065	-1.96563	-1.93381	-0.472177	0.778328	1.01853	1.2022	-1.15117	-1.55064	0.0889211	0.34551	0.306545
ENSG00000102683	-0.740123	-1.14562	-3.27862	-0.216898	-3.8528	-1.35439	-1.49399	-1.18071	5.3213	1.40918	-1.77266	-1.54638	0.047547	1.28709	-6.66099	-2.40631	-4.81024	1.42638	-0.00674483	-1.33039	-0.194241	2.57893	-0.217595	-0.889682	-0.973093	-2.74638	0.906617	-1.43963	-1.43451	-2.10371	0.93472	0.599091	-2.51317
ENSG00000134115	-0.131736	-3.99108	-0.187014	-1.4348	-0.960249	3.41085	-1.77442	0.447495	0.666724	-0.7017	-0.295658	-1.20151	0.644556	-0.428978	-0.320962	-0.205196	0.609807	0.138848	0.950973	-0.709132	-0.359181	-0.673047	-0.854434	1.67113	0.141665	0.0548031	-1.41005	1.53888	3.38329	-0.0591016	-0.065801	0.369149	-0.458912
ENSG00000163803	-2.13792	4.56182	2.15461	-2.98205	-0.163941	0.422531	-2.51975	1.65952	-0.286115	-0.531417	0.565029	0.375436	0.659371	0.862755	0.210661	0.0875642	3.3963	2.3746	-0.293053	5.04024	-2.07672	1.04304	-2.27401	0.600953	-5.23032	-0.257711	-1.77105	0.00704792	1.43707	-0.456007	-3.92141	0.0378063	-0.317421
ENSG00000019991	1.7708	2.11894	3.56501	1.66704	-1.01703	0.749231	-2.03707	-0.91047	1.38618	0.125682	-1.47477	-0.480007	4.19766	1.62011	-3.23524	-0.825287	0.614105	-1.00449	0.838252	-1.71287	-2.29505	1.31412	0.676815	0.482941	3.03888	-2.24091	5.74172	-3.31535	2.16939	3.96041	0.762683	0.0911487	1.4319
ENSG00000162543	-0.895502	-0.68301	-1.58861	0.255534	0.0649567	2.1627	-2.81715	-3.39491	-0.913217	-2.17357	0.189058	2.65895	0.492471	0.672026	0.732004	-0.588322	-0.12196	0.0381583	1.33454	-0.247946	4.96665	-4.94149	-0.313941	-1.84579	-0.243033	-1.91082	-0.785698	0.268019	-0.297358	0.883553	-1.87924	-2.53123	0.714031
ENSG00000101670	-0.219246	0.562989	2.3923	0.0316101	1.80354	7.17566	-4.04034	-1.26278	1.78775	0.705632	-0.376932	-1.28214	-0.0855116	-0.881952	3.18034	0.614687	0.190372	-2.97451	2.50713	-2.01301	-1.83151	-0.434315	-2.39587	-2.32695	5.54998	-3.24592	-1.71477	0.985556	-1.51809	0.45839	-4.05265	-4.45963	-1.53583
ENSG00000121210	-0.75942	-2.68085	0.0821387	-0.75543	3.42837	0.797282	-0.985068	-0.00661499	-0.360541	-0.505041	-1.50478	-1.04431	1.07092	-1.12938	0.0246164	0.368532	0.272166	-2.94131	1.62359	1.67431	-0.83179	-0.987764	-1.05583	-0.739734	-0.882262	-2.19807	-4.33799	1.75518	-0.229265	3.85657	0.172609	0.354824	-0.94777
ENSG00000175920	-0.623964	-0.4427	-1.70858	3.98633	-0.642143	-1.11026	3.62096	-0.555547	0.766599	1.49744	-0.675664	1.4397	-0.82299	0.00278657	0.711096	-0.81003	-0.173265	-1.19865	-0.00757164	-0.67148	0.432334	1.73283	-0.750851	0.40009	0.440714	-0.40422	-0.431472	1.48774	-0.266649	1.14819	-0.578947	-0.976436	-2.55549
ENSG00000170310	-1.17942	0.0148125	2.23507	-1.96123	-3.94454	2.88055	4.21158	1.52622	3.90236	0.35973	5.73956	3.44905	-2.3407	-2.45163	0.217954	-1.11971	-0.32005	-1.47417	-1.18508	-1.658	0.407043	0.259037	-0.356057	-0.11966	-0.32366	0.328801	-1.42823	1.16633	-0.668392	1.10322	-2.23806	-2.16127	3.40482
ENSG00000163956	1.52998	-2.66021	-2.01575	-0.137958	-2.16739	-3.09717	0.307915	1.02927	-1.57393	-1.95915	-0.472956	-0.264829	0.207606	0.0164024	1.79266	-1.01425	-0.300055	-0.696495	-2.99261	1.01606	0.818128	-0.0932356	0.355988	0.373113	0.279443	-0.312921	-0.75621	-0.64555	0.434593	1.94692	-0.638411	3.65652	2.37387
ENSG00000050730	-2.14016	-2.01971	0.148267	-5.80155	-0.474645	0.452925	-2.33044	0.283103	0.3444	2.15535	0.502421	-0.12234	0.894712	0.870269	-1.11573	-0.137252	0.163186	-3.52196	-0.0253631	0.485733	0.264261	0.320446	0.878695	-1.14224	-0.763171	-0.693997	-0.627822	-0.406001	-0.739857	-0.634556	-2.67219	-3.72752	-3.36652
ENSG00000185989	-0.445084	0.439988	-1.08549	2.44598	-0.185325	-1.74377	-1.14026	-0.35542	-0.897757	-1.0996	-0.53411	0.0260002	-0.408779	-1.16766	-1.24634	0.941982	-1.13599	-0.465335	0.226906	-0.412807	-1.48296	-0.0545199	0.0156766	-1.23467	-1.91596	-1.24806	-1.7371	0.588567	-1.19564	1.15007	-0.950765	-0.673754	-0.597463
ENSG00000135643	-1.0548	0.375634	-1.69655	-0.365451	0.554495	-0.886859	1.24982	3.42627	0.912162	1.60676	1.28646	1.34037	0.501855	-0.480143	-0.104635	0.46842	0.414968	-0.648249	0.735092	2.83606	1.06095	0.874573	-0.0921759	-0.82197	-2.36693	0.797287	-1.7514	2.00408	-2.52723	-0.00765263	-1.18658	-0.267606	-1.32578
ENSG00000092470	-5.35811	0.217268	-0.509607	1.52488	-2.28111	-1.03789	1.13145	-5.76969	-2.72845	-2.52794	-0.00444557	-1.64826	0.0756209	-2.42521	1.07513	2.34937	-1.02755	0.244594	-0.245268	-1.01831	-1.2377	0.152909	1.59968	1.57995	0.205102	0.224996	5.59858	0.798946	-2.43831	-0.607459	-0.308287	-0.828597	0.864638
ENSG00000120658	0.550367	-1.64859	-1.35518	-1.0295	-0.530962	-0.841205	-0.986176	-0.475988	3.80234	-1.48176	-2.49233	0.563216	0.111351	-0.374563	-0.983955	-0.697676	-1.74427	0.435732	-1.977	-4.05744	0.933572	2.6586	2.54789	-2.01956	-0.889059	-0.712981	1.22452	0.594437	-0.0522033	3.3911	-0.488103	0.18937	-1.29266
ENSG00000106003	-1.31744	0.252442	-0.0052264	-0.216041	-3.53646	0.236528	-1.24879	0.49271	0.0772929	-4.0865	1.08348	0.537813	-0.623236	-2.32464	-0.363492	-0.650676	0.194953	-1.81017	-3.90066	3.89666	3.07324	-1.95794	-1.10143	0.130869	1.46723	6.33208	-0.19545	0.104243	-6.4857	-0.237837	-1.46673	2.21827	-0.423695
ENSG00000182718	-0.939963	-0.595077	-0.394309	3.6997	-2.64753	-0.738159	-1.5136	2.54185	5.32317	-0.0504139	-0.0473439	-0.0229447	-1.69689	-0.321933	-0.0832141	1.16801	-0.0693688	-1.57367	-0.481468	-0.345783	-0.747999	1.54985	-1.16412	-1.60872	-5.36805	-1.02255	-1.22358	-0.0815759	-3.73372	0.866302	-0.565534	-0.614927	-0.984119
ENSG00000112902	-1.4358	-1.13211	1.65671	1.35033	-0.439374	-0.898809	-2.25016	-0.468261	1.10126	-0.609478	-1.03286	-0.338938	-0.199612	-3.67084	-1.56046	-0.7405	2.41985	0.657457	-0.704243	-1.47293	1.09579	0.306968	3.49754	0.364275	0.326213	0.0637527	1.10227	1.17511	0.358727	-1.11534	-0.898182	-4.05398	-0.810163
ENSG00000182326	0.621571	-0.0916742	2.39911	1.73427	-2.41548	-0.0437498	0.223826	-0.459501	1.06559	1.15054	2.54642	-0.939327	0.631048	0.325836	-0.40289	2.43071	-0.0218257	0.134349	-0.638961	-0.565697	0.216964	3.77723	3.56528	-1.8912	0.110539	-0.366192	-0.264354	1.45205	-0.577646	0.342377	0.397719	0.0666612	0.0918035
ENSG00000112367	-2.65653	-0.259219	-0.425581	-0.0992887	-0.103926	0.142076	1.68888	-0.0590792	-0.347718	-1.60771	0.864014	1.89379	-0.18129	0.465727	1.73872	1.76825	-0.328297	0.493406	0.886526	2.29028	1.82501	0.40431	-1.3574	-0.0604954	1.89423	1.29941	-1.354	0.390632	1.18162	-0.434609	0.11737	-0.975638	-1.96461
ENSG00000135406	0.333277	-0.543707	1.42836	2.00971	0.592067	-0.054896	-1.68223	-0.779003	1.78228	0.166489	-1.31948	-1.08623	-0.442233	1.60895	-2.66294	-3.03986	2.2282	3.6178	0.0313623	-0.59083	3.18127	1.6348	-0.238272	1.57485	0.539548	-1.97371	0.151585	-0.0566339	-0.0274687	1.16586	-0.658567	-2.88657	0.283081
ENSG00000170153	-0.388408	-1.06995	-2.44681	-0.0524508	-0.475591	-0.856336	-4.37189	0.748604	1.54107	0.248775	0.661461	1.05222	-0.193739	1.05891	-1.34402	-0.24023	-1.36389	-0.290774	-1.10484	-1.91615	1.59348	0.360837	0.0455662	0.00273503	-0.10686	0.0236595	0.360273	0.201256	0.129586	0.196448	-1.37559	-0.158766	2.38042
ENSG00000204178	-3.26454	-0.522846	0.0710528	0.465116	0.454774	-0.845298	-0.326729	0.576645	0.306448	0.388537	1.06113	-0.583678	0.442221	-0.0626654	0.117814	4.31261	-0.825471	-1.95167	-1.68154	2.59013	1.39899	-1.06742	-0.276415	-1.2878	-2.4175	-3.32495	-1.16118	0.38108	1.51378	0.72147	-0.875246	-0.417882	1.06
ENSG00000143554	-1.74306	-0.0333763	-0.702022	-0.677454	-1.63346	-1.03022	-1.80611	0.582847	-3.34459	-0.486678	0.597901	1.64007	0.469982	4.75793	2.93234	-0.0624117	-0.26227	4.83542	2.32225	-1.25066	-0.279011	1.93609	-0.224804	2.63169	2.53056	1.02668	3.26718	0.744517	2.81731	3.80475	1.58039	-0.227114	0.840382
ENSG00000155158	-0.123839	0.607271	0.264246	-0.976192	-1.26135	0.525222	-0.725048	-0.0245095	0.955548	-0.000673782	1.1528	-3.4889	1.63395	-0.504922	-0.202533	3.66485	-0.134186	1.72346	0.482003	-1.82015	-0.59886	0.191727	-2.84577	-0.294544	-5.95159	-0.181881	1.68436	1.74922	0.110227	0.455432	0.207299	-0.0960316	-0.164156
ENSG00000106123	-1.57785	-0.922814	-1.8281	2.41112	2.79521	-0.422443	-2.63757	-4.58281	-0.108723	1.71614	-6.2642	-1.43	-0.252169	-1.76894	-2.94149	-0.447339	0.236855	-2.02606	-0.37308	-0.417603	1.29624	0.700228	0.127413	0.0211759	-1.83798	0.0206466	5.38123	-0.884463	1.42968	-0.715009	1.69253	1.58319	-1.10863
ENSG00000251503	-4.13039	0.477269	0.88789	-1.26707	-2.37258	2.18723	0.0731011	-3.91414	-0.091132	-0.106251	0.172925	-0.913541	2.59235	-3.47191	1.92799	-0.112659	-2.72509	-0.136273	1.47799	1.82848	1.96919	1.25209	1.95881	-5.29524	2.19558	2.74475	0.354566	2.96438	2.88868	-0.110463	3.12403	3.80422	0.819478
ENSG00000154914	2.03236	1.57735	-0.96147	-0.474576	1.31825	-1.948	0.519574	3.32919	-0.695177	2.18819	2.02529	0.774067	-0.811593	-1.90375	-0.184873	-0.570857	-0.385691	0.416689	1.13636	-1.0484	-1.90171	1.2137	-2.41964	3.46407	-0.655018	-0.0481748	-0.684471	-0.99418	0.770191	-3.41655	0.634382	0.521332	1.05835
ENSG00000150625	3.04453	2.27949	1.8537	-1.92578	0.880095	1.12155	0.846858	3.08588	0.214657	0.378917	4.03128	6.69452	1.69027	0.725373	1.82637	-0.0605867	2.15066	2.02072	0.519099	0.572053	-0.968168	2.17655	-1.25836	-0.00556222	0.715713	3.50917	-1.93937	4.30549	-0.266647	-1.74748	1.05152	1.61154	-0.432276
ENSG00000122986	-6.04291	-1.42208	-1.0824	-0.777725	-0.975787	-2.56531	0.702914	-1.94988	1.86033	-0.873809	-1.01189	-1.13355	1.88165	2.1473	0.755104	-1.11642	1.27576	0.18968	-0.0517919	-0.0312171	0.388684	1.09174	1.52095	-1.85214	4.1429	-3.48848	1.13544	-4.69098	1.12889	0.722462	1.8531	-2.87064	1.86239
ENSG00000074964	-1.57388	3.43985	-1.42123	0.141825	-0.982244	1.99226	-0.637255	0.790993	0.222361	-0.919844	-0.419259	0.617533	0.074285	-1.52081	0.31501	-1.30127	-0.355899	0.113603	-1.37962	-2.15843	-0.0899854	-1.04813	0.553728	-2.31751	-0.618486	1.26058	-0.227908	1.40049	-2.79999	-0.497533	-1.07407	0.394743	1.67032
ENSG00000128335	0.751088	-0.277938	-0.29086	0.231196	-2.42574	-5.46921	-0.291347	-0.203406	-2.3135	-5.09686	0.467235	5.13173	-1.12886	-0.367895	5.15191	-0.390306	-1.22639	-0.812844	1.3196	1.53193	-0.958864	0.280809	-1.39881	0.673854	-0.107821	0.360341	-1.82352	-1.50455	-0.692391	1.83705	0.178631	0.244613	0.154186
ENSG00000163909	-1.72804	-0.445823	3.97853	-2.84902	0.808217	-0.962265	0.0936832	-1.23613	1.35415	-0.308953	0.782349	-1.25918	-0.55324	-2.56927	0.570568	2.59364	5.99255	-1.79715	-1.63549	-0.077854	-1.21156	-2.48825	-1.56367	-3.13921	-1.95264	1.43033	-2.49156	0.934098	-0.196941	0.452126	-1.48965	0.136147	-1.79586
ENSG00000157368	-1.1765	-0.834154	-0.164671	0.588337	-0.0206656	-0.392092	0.239629	4.90572	0.293347	-0.747126	-0.30241	-0.485993	0.159998	0.24546	0.154066	0.114	0.112196	-1.47827	0.62352	-0.0630009	0.360049	-1.93804	-2.7398	-0.202833	0.0521835	0.344759	-0.0990787	0.93044	-1.42211	0.0653826	0.17413	1.38784	1.79708
ENSG00000116981	0.91206	3.86181	0.503064	-1.48923	-0.341342	-0.688041	-2.00857	-0.148773	-0.024582	0.324503	-1.89545	-1.41592	0.477447	-0.321765	1.38992	0.395154	-0.875411	-0.6024	0.255473	-1.33822	2.58551	-4.42609	0.704875	0.30336	-2.42061	-1.06076	-0.188429	7.37472	-0.338353	-1.33035	-0.273403	-0.661657	0.247978
ENSG00000119147	1.56543	0.141837	-2.84983	0.062551	1.83713	3.79771	2.07666	1.4085	2.43132	1.12948	-2.68502	-2.66375	0.117349	1.35958	-0.328872	-0.643939	0.917215	-1.36308	2.20669	-0.690314	-1.95494	0.668522	-0.750912	2.00812	-0.160855	0.955156	2.3906	0.447241	2.34235	0.152095	-0.387157	5.5455	-1.44358
ENSG00000272325	-0.799702	2.3707	-0.29169	1.76371	-0.111845	0.449638	1.98221	3.79039	1.59643	1.39793	-4.17057	-3.73003	-0.538584	2.37438	-2.47797	-1.4895	-0.722962	-2.3072	-1.97949	-0.506689	2.2231	3.13611	2.49312	-1.10932	-3.27739	-0.234346	1.76657	2.08051	3.43726	2.04465	1.00549	2.5862	-1.4131
ENSG00000185015	-1.68244	-1.5963	-0.323516	1.71303	0.209218	2.88385	1.03946	1.35043	-1.08062	0.0829647	1.93524	2.02885	1.62925	0.424698	-1.41444	2.5835	-0.314092	-2.66616	1.17168	1.67645	0.0796591	-0.997365	1.46808	1.63523	1.12615	0.930512	0.906861	2.973	-0.956179	-0.822915	2.47793	1.22595	1.514
ENSG00000183688	2.51949	3.8715	1.34432	3.93224	-0.660227	0.581532	5.06169	-3.62265	-3.75207	-0.460108	0.491073	0.457787	0.388989	2.41098	-0.0713767	0.437719	1.54543	-1.7734	-0.897907	-1.2774	-0.53774	-1.2022	0.462874	1.23695	2.10423	0.700171	0.563701	-1.75997	-0.339036	-1.36812	1.93048	1.81934	0.701912
ENSG00000144857	-0.787182	2.4038	-0.343832	-3.02711	0.113912	0.419165	0.0246506	-0.706802	2.41186	0.0408715	-0.981085	0.306837	0.501029	1.13398	0.935149	-5.12434	-0.518364	-4.71887	0.839136	1.35817	3.41033	0.370866	0.233694	-0.360261	0.246134	1.43256	-0.8444	0.883387	0.333186	-0.224371	0.131801	-0.698624	-0.251115
ENSG00000104267	1.67288	0.113437	-0.880612	-2.48121	-0.427181	-0.399777	-0.0192879	0.799112	-0.657276	0.034972	0.039308	-0.538677	-1.05303	-2.90959	0.328719	-1.73087	-1.14769	0.500449	0.764754	0.0493721	-0.429331	-0.130702	0.266472	-0.916266	-0.15799	-0.305729	0.685146	-3.68836	0.411421	0.483719	-1.39071	-2.97907	0.915805
ENSG00000123143	0.0879761	0.194012	0.602108	-0.124113	4.27935	0.741483	1.13481	0.738479	-0.474154	1.01944	0.780094	-0.0775224	-0.950509	-0.386868	3.68577	-0.577843	0.284791	-1.43594	0.212648	0.167792	-2.15111	0.599624	-0.0698793	1.47762	-0.793555	-0.248677	-1.55416	0.436401	0.804634	0.809167	-1.48523	-0.206091	0.293693
ENSG00000179593	-2.3938	-2.15794	-1.45492	-1.77861	4.43596	-1.98817	-0.193788	1.26121	-1.79517	-2.35147	-2.1598	-2.01485	-1.05183	-3.38254	-0.726385	-1.18818	-1.53708	-1.73741	-0.956872	-1.88719	-0.277097	-1.98771	-0.664982	1.86878	-2.82145	-1.28333	-0.600476	-0.613062	-0.512363	-0.698146	-0.830183	-1.85977	-0.55625
ENSG00000142765	0.854454	0.993093	0.618545	0.892134	-0.747721	1.00931	1.53891	1.10967	0.130554	0.581969	-0.195564	0.425485	0.722854	1.86887	-0.250093	0.957318	0.88894	0.56687	1.60104	-2.13537	0.330495	-0.101863	-0.299953	-0.93285	-0.22554	-1.65079	-0.230186	-0.0935978	-0.498443	-1.93092	0.279679	0.670403	2.62554
ENSG00000081479	-0.965195	-0.262366	0.0135023	-0.565838	0.280448	-0.702965	-1.35059	1.54186	-0.797541	-0.877382	-0.0375004	0.315284	0.347385	-0.140543	-1.40884	3.02966	0.481488	-0.565715	0.942484	2.22324	-2.04305	-1.42769	-1.48033	-0.841004	-0.462844	-0.125104	-0.465997	1.20803	-0.660055	0.479084	-0.90833	-0.961386	1.60998
ENSG00000186867	-0.0676903	-0.300251	-1.89906	-1.32577	0.0264312	-3.20765	-0.570706	-0.224383	-0.910485	0.13212	-1.03488	-1.45009	0.454058	1.64379	-0.853255	-0.297224	-0.88956	-1.27872	-0.368965	0.00227896	-2.0582	-0.981169	-0.784627	-7.85868	-0.32706	-1.13041	-0.990127	-0.262076	2.62047	-1.50179	-0.164259	0.276637	-2.3892
ENSG00000206530	-0.164403	0.510012	1.31455	2.30665	1.7273	0.462725	-4.87012	0.553406	1.88961	2.4252	0.794513	1.66638	3.03243	-0.489261	0.42073	4.97044	0.56178	-0.988774	0.0771752	0.218851	0.23683	0.407192	-0.319312	-0.586327	0.102249	3.01092	-5.66277	0.707331	0.670336	-2.63328	0.467564	1.31435	1.83589
ENSG00000243927	0.190893	1.19368	-0.652866	-0.109766	-0.234557	-1.97326	1.15848	-0.435324	-0.555994	-0.327747	-0.315731	0.163813	-0.785099	-1.2997	2.41504	-0.886676	-0.113326	-0.0195619	-3.89733	-1.00272	3.66755	0.218876	-0.972522	-1.25243	-0.814503	0.169599	1.76357	-0.517296	-1.06569	1.67876	2.9395	-0.345847	-2.47086
ENSG00000083444	-3.27441	1.13415	-0.553944	-0.582504	-0.58879	3.53997	-1.37408	1.3724	-2.56177	-0.145373	0.126453	-1.61764	0.0565871	-0.480786	-2.40204	2.95365	1.01307	2.98832	-2.74922	-2.27356	-1.41896	-0.945022	-1.11205	-1.96904	-2.46021	-0.664373	-1.25979	1.30959	-1.41303	0.689162	0.193411	-3.15332	-1.0486
ENSG00000012779	0.583356	-1.02976	-0.555835	-0.0496565	-0.972197	0.630493	1.47421	2.37116	2.88205	-1.52224	1.17459	1.41852	0.271012	-0.14455	1.86209	-0.636465	-2.03912	0.406856	0.0170926	-0.104582	1.76883	-0.77895	-2.6331	-1.51358	-1.82982	1.4415	0.542045	0.139067	-0.35543	-0.169577	3.54054	0.977588	-3.66879
ENSG00000163453	0.660644	1.20901	0.348968	-0.940423	2.02168	0.380951	0.794143	-1.83387	0.495802	-3.09431	0.88312	-0.0895281	-0.373037	1.03192	0.0134778	-1.78551	1.00966	4.74884	-0.618357	-0.608434	0.712861	-1.50386	-0.224581	-0.519833	-0.026039	-1.44218	0.0877242	0.857312	-0.247131	3.72763	-0.599534	-0.938319	-0.107105
ENSG00000137393	-1.54706	0.877827	-1.31051	0.204665	-1.72626	1.50034	2.03292	-2.43066	-2.30354	-0.15232	0.163448	-0.305626	0.0929596	-0.490769	-1.11303	1.33764	-0.504234	-0.791345	-1.04295	-1.05525	-1.80626	-1.51546	-0.698456	-1.92347	-0.226011	0.293774	-2.24023	0.739447	-1.00932	2.45324	0.511034	1.88442	-3.22507
ENSG00000158806	0.422478	0.158347	0.78152	0.575265	0.0475329	-0.329324	0.105411	0.311892	0.284442	-0.0447821	0.276748	-0.289722	0.249388	-0.671163	0.27556	0.638475	0.108042	0.144665	-0.459679	0.665104	-0.738296	0.0207501	0.176735	-0.0124003	-0.826819	0.232149	0.0444785	1.01433	-1.48323	0.0570244	-0.0129035	0.103848	0.593573
ENSG00000198838	-1.8082	1.01557	1.91912	5.56213	0.486065	1.87486	-0.560521	0.0825623	-2.30979	-0.118203	-2.4766	2.11672	-2.72081	1.81161	0.46085	1.22226	3.1328	0.0897421	-0.00889221	-2.24631	1.78863	0.514141	-3.42103	-1.97011	-0.263765	-0.053317	0.12092	0.574028	-3.84895	0.950549	1.02918	1.33732	0.0679629
ENSG00000127863	-0.590508	-2.04464	-4.53697	1.24567	0.200766	-6.39667	-2.34035	-0.326423	-1.06625	0.253139	0.202583	0.52528	4.49524	-1.27184	1.52289	1.33437	1.55267	-0.0580957	0.730119	-2.45776	-0.925631	2.0674	0.205426	-1.33857	-0.0143739	5.64648	-1.30653	5.70488	-1.10813	1.20864	-1.28408	-0.630026	0.28479
ENSG00000140519	0.490327	0.697147	0.566342	1.37532	-0.756551	-3.48199	-0.00601779	0.594964	-2.70601	0.251895	-0.287171	0.323274	1.11191	-0.770321	0.211822	0.565589	-1.64144	-1.31059	1.17962	-3.74234	0.141096	-4.21018	3.18238	-2.47899	1.16643	0.603075	-0.825432	0.59023	0.0750893	1.78185	4.7126	-0.163516	-1.2063
ENSG00000104320	-1.35653	1.5924	-0.670131	0.799006	-0.546584	0.69205	-2.74436	-2.73786	-1.41362	-0.460186	0.6817	-0.631778	-1.48317	-2.41266	-0.584527	-1.37704	1.37026	-1.01584	-2.69873	1.12427	-2.10959	0.140242	1.19856	-1.54876	-1.58426	0.357945	0.0349376	1.97762	0.141094	0.362703	0.0461226	-0.430222	-2.21426
ENSG00000122420	0.694654	1.62889	0.0964454	3.04917	2.51444	1.30292	-0.00989165	-5.49315	0.614549	0.709164	-1.71279	-0.612675	1.09359	-0.446742	-0.758445	-0.779365	-0.00363751	-0.166878	-0.774277	-0.318053	0.835105	-0.676234	0.65329	0.312466	-0.0130705	-1.32062	1.66268	-1.42054	-0.571569	-0.861028	-3.69161	0.00850049	0.860734
ENSG00000250510	4.31362	2.69485	0.138177	-0.148237	2.07384	2.0136	-2.88108	1.93837	4.32705	0.270475	-0.0261412	0.498646	0.0969593	0.576789	-0.713391	0.0211416	1.79847	-4.17748	2.93757	-2.29648	-0.488545	-0.460416	0.667074	-4.13859	-2.07287	-1.56186	0.377562	8.73987	-1.23037	-0.297434	2.27587	0.680177	0.526359
ENSG00000173208	-1.69134	4.64482	-0.1177	-3.11354	-0.551082	2.52789	-5.10665	1.11371	-3.21945	0.110156	1.79934	0.968933	6.90688	1.19843	0.677037	2.25151	0.625073	2.34627	-1.72945	2.84321	1.53496	0.814487	-4.57472	-0.39828	0.0415078	1.23722	1.94402	3.6612	-0.00461697	1.07521	-1.3944	-1.18484	-1.24909
ENSG00000179477	0.255165	-1.07556	2.96804	4.65505	-0.383145	0.863266	1.87294	0.26164	0.778289	2.97296	-0.654682	-0.602581	-1.24899	-2.96026	0.0144331	-0.734061	0.502357	-6.31285	-0.433225	-0.180569	0.997053	0.0275333	0.516702	-3.57657	-1.00078	-1.20456	-0.381488	-0.838042	-0.488273	-2.47523	-2.62754	1.57121	-0.0452292
ENSG00000151789	4.1314	0.452904	0.221584	2.13274	-1.22122	1.10327	3.10815	0.221901	-0.684217	-3.42981	0.842927	0.784264	-0.98122	-3.75788	0.109884	-0.9565	-0.112489	0.629841	-2.98397	-1.20042	-2.43473	0.737057	-0.530465	-0.764263	-3.06882	-0.817275	3.38812	3.17361	0.970772	1.1008	0.0808456	0.695478	2.90275
ENSG00000138434	-0.402014	-0.0116078	0.576153	3.1453	-0.0866733	1.37389	-2.76798	2.8917	-2.03524	4.05986	-0.855632	0.117981	0.82296	-0.187508	-0.291898	0.512772	0.899217	1.00414	6.8384	2.40458	1.83033	-0.363902	1.43582	-0.194755	0.160146	1.22213	1.58142	-0.472429	2.68522	0.168662	-1.14341	-0.996204	-0.988528
ENSG00000138606	-0.797639	2.65194	0.555822	0.336139	0.202178	-0.749115	-1.00501	-1.53345	4.6032	2.44427	-1.03703	0.54405	3.59728	1.30434	1.79359	2.82117	2.87342	0.3073	1.17258	1.845	2.69345	0.81389	0.40495	1.83554	3.50533	2.59816	0.372367	1.88098	3.38822	-2.70391	4.84604	-0.136542	0.908613
ENSG00000180979	-1.57736	-1.26211	-1.65659	0.270808	-2.47909	-0.330497	2.09166	0.307254	0.0596126	-1.13519	0.472186	0.294961	-1.67541	-2.92261	2.09641	-1.02562	0.736305	-1.43117	0.335397	-1.49267	2.11497	-0.859724	0.996444	-3.05511	1.5491	-0.597712	0.75436	2.2249	1.13718	2.68266	-3.2789	-3.96226	-2.404
ENSG00000114026	-1.05265	0.483579	-1.29769	3.01457	-4.80145	-1.94964	0.211786	-0.262143	-0.454513	-0.0896927	-3.40544	0.68879	0.322651	3.06215	-1.59395	-2.69304	0.0346551	2.06139	-1.00478	0.778861	-1.63239	-0.473662	-0.776599	0.268929	-1.63809	1.33023	0.898073	0.359185	-2.59012	0.641826	-0.55614	-1.32806	0.666248
ENSG00000132359	-0.565559	-0.100335	-0.244935	-0.142535	-0.101443	-0.135093	-0.0732959	1.00737	0.280478	0.638088	2.29774	-0.12111	-0.361617	0.990192	-0.113888	-0.0510327	-0.367108	-0.439983	-0.0878206	0.486836	-0.584556	0.291257	-0.837112	-1.62119	-0.242172	-0.267018	1.99236	1.08839	-0.118701	-0.678411	-0.140439	2.46719	-2.19488
ENSG00000140254	-3.53126	-3.18673	-2.99743	-4.20451	1.20291	0.35687	-0.0364967	-3.85438	0.570414	4.20719	-3.96945	-1.07776	-1.80301	-2.4485	-0.814133	0.13633	-1.62369	-2.03458	-3.71351	-1.55577	-0.0846609	1.54329	1.36506	-1.85371	-1.32636	-2.77666	0.679489	-3.15206	-0.4734	-0.377574	-2.02328	0.553802	5.74303
ENSG00000183134	-2.12688	-1.09376	0.645084	-0.972773	0.720555	0.32528	-1.10247	-1.303	0.65843	0.708372	0.30333	-0.945403	-1.31391	-1.54739	-0.839301	-0.819943	0.175122	0.975376	0.808281	-2.22407	0.663844	-1.37792	6.58203	0.210678	-0.863905	-0.923474	-1.70842	-0.4382	-1.12014	-5.21568	0.215448	2.66399	0.582667
ENSG00000152556	5.59313	-3.59474	-1.68627	-0.31771	-0.263514	-1.19775	0.713783	0.968419	-0.383785	-1.58207	0.843276	0.150679	0.585335	1.39497	1.6412	0.670709	-0.311813	-0.571671	-1.39613	1.7361	5.67472	-1.2753	-2.23065	-1.64471	-0.245078	0.528118	-0.684714	1.05252	1.16083	2.70601	4.57053	3.7979	1.78706
ENSG00000005175	-0.935079	-2.79239	1.13326	-0.725405	1.81729	1.74173	5.14315	0.630359	-2.54864	-5.1005	2.14238	-1.06326	-0.471759	0.164068	1.1758	-0.333615	0.581356	-1.87156	-0.0272872	2.61914	3.29477	0.896265	-0.370434	0.409262	0.546218	0.656619	0.360913	5.41795	0.292145	0.076569	-0.38453	-0.364872	-3.26639
ENSG00000082556	3.7227	0.649068	0.57878	0.4937	-2.19657	0.981177	-0.284289	1.44842	-0.371369	0.0511598	-0.675169	-0.124061	-0.752522	0.672944	0.515115	-1.92713	-0.0305083	-1.13237	-1.45504	-0.131874	-1.37777	1.18885	-0.470475	-0.461948	-1.58617	0.300557	0.374211	-1.50396	-1.06992	1.73175	0.638945	1.67419	-5.35806
ENSG00000166407	-0.749848	-0.980579	-0.130966	-1.4255	-0.109139	1.91017	0.130767	2.00034	2.59858	0.35879	0.297966	-0.607496	0.165884	2.75697	0.99521	-0.229797	0.671675	-0.140055	-1.90148	0.523891	0.388382	0.315072	2.27521	-0.937622	0.330652	-1.18981	1.471	2.85288	-4.27046	1.26016	-1.63198	3.5255	0.37248
ENSG00000151773	-1.54764	-0.919748	0.727244	-0.874932	-0.788009	3.64098	-4.16954	-0.566455	-0.0818463	-0.996731	-2.17065	-1.70688	1.22778	1.93702	-2.26926	-1.42873	0.534617	-1.84698	0.130151	1.17251	0.101723	0.223893	-1.21634	-0.70853	-0.530859	-0.299665	-0.433902	1.47364	-2.21953	-0.271269	-0.0103092	-2.78774	-1.75901
ENSG00000175643	-0.866953	-0.353153	-0.740106	0.0939143	0.191264	-0.588123	-2.39505	-0.123727	-2.47974	-0.834069	1.53613	1.53076	0.390137	-0.45844	1.79308	0.486661	0.155344	-0.675886	0.360305	1.55943	0.0534026	-1.00876	-0.145864	0.22602	-0.294452	0.424581	4.5699	-0.0373627	2.27145	-0.210432	-1.42145	1.26366	1.10363
ENSG00000180881	-0.409571	1.02639	0.126275	-0.613263	-2.41942	0.344432	3.93725	0.734079	0.166828	-0.423519	-0.258532	-0.0636059	0.0618801	0.700802	-0.851566	1.09505	-1.70804	0.690281	-1.31346	-0.220323	-0.00459029	1.20356	-0.0149045	1.37692	0.255108	-0.340583	0.622366	-2.24577	1.95461	0.224746	-0.287411	-0.208997	-0.61507
ENSG00000132004	-0.552773	0.563848	0.98026	2.81366	0.115146	2.58367	0.249454	0.361098	1.70562	1.11364	-1.3961	4.54413	-0.903787	2.68517	0.459829	0.104125	4.00286	-0.736221	1.36814	-0.595774	-1.00391	-2.05757	-1.40791	3.2076	0.775889	0.74112	1.3734	1.62578	0.8167	-1.76725	1.46586	-3.18814	0.523927
ENSG00000134138	-0.52351	-0.303929	-0.225871	-4.30678	2.11443	1.6973	-2.20475	-1.21397	4.77439	0.519238	-0.0711853	-0.398098	-3.11059	1.41691	0.130963	0.293738	-0.492443	-1.76722	-0.790808	0.00239476	1.33062	-0.0549845	0.91276	-0.54836	1.579	0.307711	-1.41624	-0.980859	-2.51874	0.753574	-0.142386	0.211257	-1.55689
ENSG00000124701	-2.02004	-1.72397	2.12526	0.35652	-1.15975	1.0047	0.623389	-2.86548	-1.68919	0.580424	-0.43564	-0.120705	4.80985	-2.91736	0.48156	0.340795	1.7611	0.255156	0.218767	2.1684	-0.470374	-0.155185	-1.15023	2.03973	-0.690574	2.77304	-0.0925025	-1.22334	-1.44312	0.212259	-0.107024	-0.221449	-1.25925
ENSG00000164543	0.337347	-3.37451	-2.07492	-0.882689	-0.529864	-2.45825	-0.371449	0.951718	1.76278	0.269083	-0.543249	0.00513134	-1.42637	2.05198	0.212462	-0.168276	-0.198882	-0.390913	0.172792	-0.117121	2.25971	-1.17498	-2.51479	-0.291584	0.381786	-0.545549	-0.567381	2.77492	-1.11785	0.659679	0.428242	0.762567	-0.322075
ENSG00000137857	-0.447283	-0.876603	0.335893	-0.289545	-2.36499	-0.29548	-3.04704	-0.100601	-1.39497	1.12116	-1.19614	-1.71971	-3.18897	-2.46428	-2.60156	0.204832	-1.31268	-1.74144	-0.442608	2.77284	-2.54909	0.183086	2.00644	-2.1844	-1.51956	-0.995957	1.46811	2.46665	-1.17934	-0.36944	0.267188	2.61337	-1.85455
ENSG00000172572	0.964704	0.661901	0.830687	-0.559942	1.06366	-0.37333	-0.342774	-2.49669	-0.893848	-0.880769	-1.14963	-1.72003	1.47639	-1.19329	-2.88199	-0.914025	0.131713	-1.19866	-1.11381	0.946785	0.610706	0.427135	-0.620077	-2.86445	-0.214165	1.03433	0.312634	1.00923	0.31003	0.102546	-1.32605	-0.664311	-0.6592
ENSG00000151136	0.558604	-0.168966	-0.254983	-0.9118	1.61912	-1.27237	-4.25755	4.77567	-3.85237	-2.36442	-0.589864	-1.15884	0.558432	-5.56741	-3.42067	0.202329	-2.51235	-2.35357	-2.81572	-1.73805	0.861583	1.63313	-2.79847	-4.12187	-5.10254	-1.31352	1.06051	-0.68657	-0.270732	1.72405	0.0613259	1.26474	0.171073
ENSG00000144712	-2.10818	-3.74366	0.0949523	0.499028	0.117315	-0.172062	0.198647	3.9848	-1.58112	-0.690849	1.2503	1.84683	-0.508497	-0.996764	-2.16764	-1.61593	0.934256	-0.0230367	0.354604	-3.08069	0.290597	0.192368	-0.183254	0.415288	-0.864592	-0.841144	-0.572327	0.469952	-0.830017	0.485252	-0.850802	0.0368572	0.204122
ENSG00000090661	0.000224361	-0.287589	0.441081	0.294908	-0.904027	-1.39657	0.117955	0.181022	0.18033	0.672074	0.19423	0.351808	0.632014	-1.07075	-0.664302	-2.30956	0.0300098	-1.91126	0.135428	1.4368	-0.322367	0.827463	0.888125	-0.59184	-0.0293377	3.84543	-0.667395	3.56631	2.49622	2.60041	-0.552966	-0.245198	0.0544872
ENSG00000204946	0.547683	2.27093	-0.516617	4.11552	-1.82677	0.599747	2.20008	-2.49491	1.55046	-0.497605	0.806193	1.37443	-1.07364	0.877151	-0.190194	-0.0422314	-4.1527	-2.88653	2.35	2.42714	1.21516	0.929316	-0.314048	-0.318883	-0.431885	0.834924	2.39824	0.544796	0.974904	-0.00808447	-0.115183	0.264553	0.243668
ENSG00000179148	-1.20119	-2.32412	0.0957666	1.19718	-0.954555	0.568059	-0.227304	1.24982	2.03735	-0.187259	1.04712	0.237578	0.186996	-0.363395	0.394207	0.0285178	-0.480574	1.42082	1.58103	-0.770862	1.80933	0.225805	-3.61977	-2.07461	-0.921218	0.395429	-0.648185	2.55652	-0.849079	3.0767	-1.02372	-0.957364	-0.45774
ENSG00000027001	-2.82075	0.791681	-0.183394	-3.037	-1.61611	2.42854	0.415013	-0.00053741	-2.95977	-0.441568	1.1822	2.73109	-0.93665	1.09559	0.779647	-1.93322	0.266416	2.25245	0.713467	1.60383	3.56169	2.13639	0.98863	-0.970726	-0.981267	0.615686	-0.815217	-1.29807	1.15989	-0.107735	-0.362381	-0.347305	-0.111709
ENSG00000110446	-0.961275	-0.46682	-0.027011	2.48667	-1.42791	-1.24111	-0.315699	-1.5014	-0.189353	-2.81132	0.340204	0.606036	0.631224	-2.77616	0.236976	0.138724	0.0732374	0.114854	-1.70993	-0.812416	-3.16589	1.21161	3.93622	-0.425053	-0.61749	-0.0834514	-0.586082	0.500261	-0.503371	0.504532	-0.0523386	-0.052703	-0.659735
ENSG00000221955	0.996691	1.48117	1.62846	1.63107	0.723381	0.264077	1.04301	-0.208816	-0.978811	-0.480039	0.101778	-0.767336	0.301535	4.3629	0.600048	-0.144867	0.521305	-1.34065	2.38379	-1.60059	1.59259	0.23449	0.546829	1.18668	0.762927	0.636104	1.73813	0.0858813	0.501448	1.6142	0.391448	-2.88098	0.516122
ENSG00000122873	-0.745455	2.59575	0.118927	-2.97794	-1.03434	-0.790566	-0.423044	-0.316079	0.0169011	0.137393	1.12391	3.41256	3.12717	-0.113374	0.270014	-3.64884	-0.093378	3.57642	0.594089	-1.19954	2.20548	3.25174	1.74957	0.360315	0.227913	0.17069	2.33576	2.03676	0.644376	0.347506	0.775944	0.479756	-0.805304
ENSG00000165887	0.446164	2.99611	-2.79694	2.25676	-0.0399135	0.233707	0.868283	-3.1698	0.0957152	1.70825	0.806971	0.675441	-1.11211	-1.51823	1.24005	1.17922	1.41833	-1.87398	0.530461	-1.26884	-1.83095	0.220099	-0.386105	1.81635	4.72848	0.834777	1.22285	-0.0298608	-0.20557	-2.57079	-0.353234	-0.746361	0.203119
ENSG00000134072	1.03248	1.05728	0.403153	0.901223	0.794216	4.10162	-0.422511	0.394408	2.11416	0.776968	-0.369024	0.0189189	0.335867	-1.55464	0.410419	-0.448364	0.237813	-1.22462	-1.33615	0.87906	-0.763306	0.371247	-0.834309	-0.894936	-2.97598	-0.456698	4.18596	2.87286	0.759486	4.19446	0.149776	-0.0667661	0.221856
ENSG00000156265	1.37798	-0.606906	-1.13858	0.0327162	-3.28181	-0.25246	-0.414385	-1.47718	-2.02006	-1.52229	-3.89483	0.896793	1.66326	-1.65396	-0.940351	-0.107314	2.52841	-0.0936029	-3.40019	-1.88774	3.19554	0.0554098	-4.60218	4.74678	1.67611	2.0343	-2.20917	1.41652	-1.63756	0.285627	-0.877671	-0.212469	0.432672
ENSG00000161217	-0.302076	2.21032	0.590292	2.0267	-1.72593	-1.49294	-0.0391085	0.0549471	-0.0235142	5.10739	0.521782	0.254274	0.000110962	-1.54083	0.138572	-0.158652	-0.909932	-2.92757	-0.320436	2.54621	-1.11762	-4.76114	2.57624	-0.250371	-1.25295	-0.375422	-0.908763	-1.55563	-0.117671	0.381033	-0.248673	1.37471	-1.28225
ENSG00000165271	0.157031	1.80436	0.610151	-2.32736	-0.0671364	0.429084	-0.43924	3.719	0.229351	0.930367	0.515208	0.668241	0.163201	-0.197294	-0.766949	1.19857	0.0854183	5.71095	-1.01389	-0.806429	1.11808	-1.17758	0.581903	-0.847247	-0.123668	0.14156	0.0736812	-0.455876	0.518232	-0.0971909	-1.55288	-2.54299	-2.20638
ENSG00000111261	3.33943	-3.72853	0.343905	-0.913811	-0.0407706	0.655114	-0.288748	1.31351	-4.39553	2.03744	0.499861	1.51301	-0.680637	2.50567	1.82197	-0.520489	-0.00872923	1.0377	1.96133	2.4802	1.10956	1.82796	4.11079	1.73966	0.0100837	0.466352	0.238626	1.32798	0.541545	-3.50269	-1.70657	-1.5306	-2.3444
ENSG00000091039	2.57692	0.0169833	5.66477	-0.116263	-0.854568	2.60399	3.51895	-0.416906	-2.86291	-6.21259	0.564715	-0.091031	3.37341	0.572586	1.37196	-1.43365	0.691462	-0.868196	-2.48578	-2.69379	-2.05711	-1.02322	-0.144268	-0.259749	0.351162	0.864996	0.739632	0.742636	1.70701	0.21275	0.333116	-0.275463	-3.30743
ENSG00000133466	0.379266	-3.08897	-2.51337	-0.525626	-0.56466	1.88498	-2.28176	-1.53808	-0.13235	-1.28047	1.45059	0.859038	2.60019	0.023263	4.51314	-0.437526	-0.10089	2.40349	2.0624	3.76077	-1.98502	-0.799815	2.46278	2.99082	1.38001	2.26378	1.64422	1.90076	-2.56348	2.11415	-1.69225	-3.86655	1.1771
ENSG00000171453	-1.00992	1.98934	-3.67382	-2.14574	-2.61899	4.84454	-0.0273867	-0.480554	-1.46673	2.58377	-5.25617	-0.888758	0.792237	-0.00696216	-1.43588	0.855395	2.86294	0.751067	-0.732199	0.053631	-0.320503	1.33454	-0.174004	0.018786	0.534708	-0.290721	-6.77064	0.675074	1.20683	-0.206035	-0.752397	-2.12806	1.73014
ENSG00000152910	-1.24145	-0.770934	0.213864	1.39487	1.41611	-0.311221	0.408396	0.987242	-0.957901	0.713527	1.63567	2.24048	1.05093	-0.23085	0.428534	1.01479	0.63736	-0.346791	1.41315	0.115795	-0.00188476	-1.6986	0.753976	0.548495	0.304544	0.340673	0.462558	2.07284	0.764967	1.09705	-3.1325	-0.119554	1.83919
ENSG00000139656	-0.7697	0.112153	1.81711	1.04228	0.024528	2.43429	0.558998	-1.99225	0.80321	-0.31623	2.74493	0.395586	-0.871136	-3.19552	-1.88568	1.20968	-0.760255	0.28873	0.568226	-0.049433	-0.104307	0.259489	0.369395	0.200233	0.0805766	0.0724624	0.0844652	-1.01134	-0.0622295	-1.22611	-0.209948	0.410051	0.230196
ENSG00000225697	3.5929	1.47659	3.60942	0.0279203	-0.167815	-0.4488	5.22603	-4.47086	1.13827	0.937764	0.74225	1.16153	-2.59985	-0.216483	-0.63978	-0.711659	-0.141534	1.11701	1.8007	-5.35016	-1.76141	5.08229	-1.11147	1.45045	2.01516	1.67304	1.24501	0.510129	0.481457	-1.34542	0.992333	-3.16532	0.662595
ENSG00000129159	-0.8001	1.66558	-0.758743	0.66426	-1.88105	0.828893	-2.94955	1.2872	4.47077	7.20796	0.708545	0.581382	0.571731	-0.578201	1.89967	-0.748561	-0.0619817	-0.947146	3.33274	-2.4045	0.639799	0.665595	0.126963	-1.07837	-0.963622	2.65298	1.00628	2.35348	-0.89153	0.308276	6.78601	2.55397	0.272079
ENSG00000198039	1.16611	1.4209	1.46071	-2.3256	-0.441451	1.19841	-0.0931697	1.38031	-2.46166	-1.72619	-2.88178	-1.4315	0.0637086	-2.09156	-2.35698	-2.53679	0.658023	-1.96705	-4.28785	-0.804709	0.851954	0.843878	0.783984	1.37544	3.21159	2.327	0.912499	3.58257	0.426341	3.86081	-0.0392991	6.20514	0.712157
ENSG00000177181	-1.41247	-1.48475	-1.3103	2.55988	1.28933	-0.887868	-0.79959	0.454816	-4.72273	-0.464681	3.07616	3.35472	3.4246	-2.22606	4.72129	-0.298698	1.17812	-1.11917	-1.02564	0.770021	-0.999904	-0.380107	-1.42788	1.08452	-0.377671	-4.67308	0.678138	2.35637	1.83506	3.0241	1.2559	5.53195	-0.0108836
ENSG00000221968	0.633639	2.30711	-0.959591	0.0587618	-1.00389	-0.477716	0.0607865	-2.51056	4.11634	0.996324	2.72484	1.4803	0.687728	0.00566621	0.618527	-1.6339	-0.164702	0.883076	0.650963	0.965432	1.41794	2.41523	-1.40964	-0.220971	-0.239121	-0.379729	3.11083	1.33898	0.292307	0.931684	-3.95448	-1.66176	1.06711
ENSG00000185634	-1.78771	-0.274133	-1.39768	-0.5889	-1.79962	-0.217694	3.42017	-7.11531	0.077706	4.93839	3.39965	0.154102	-0.163805	0.384233	-0.637642	0.688637	1.0081	-4.27658	0.56178	0.721661	4.19835	-0.540105	-4.76249	-0.297408	-0.447129	-0.325585	0.273416	1.90288	-1.28927	1.81452	-0.708276	-0.655621	1.14718
ENSG00000187323	-1.68571	1.65865	0.839475	-2.26007	0.75859	1.12226	-0.280513	1.59827	0.83642	-0.26094	0.723609	-2.92947	1.9941	-1.16705	0.808161	-2.59688	1.07238	1.64081	3.74885	1.08675	-2.463	0.0192226	-0.473847	1.21098	1.15895	0.331663	0.122916	-2.11625	-4.94702	-2.00849	0.27713	-0.105348	0.119745
ENSG00000134013	0.770197	1.30014	1.73699	0.645546	1.08533	0.543329	0.670805	1.31444	-0.861417	0.31131	0.465274	-0.881706	-0.938467	-0.181441	-1.07172	2.64347	1.17421	-0.307734	-0.0282171	-0.719712	-1.9876	1.05537	2.13087	-0.171797	0.305486	1.15153	0.0128933	-0.808327	1.68113	-0.548576	0.573651	0.0982119	1.15802
ENSG00000163793	-0.0877593	-0.342608	2.08113	2.23002	-0.248452	0.495279	-0.575284	-0.904834	-3.64584	-3.35295	-0.602935	1.65227	0.778569	-1.0725	0.615073	0.577805	-0.284434	-2.96888	-0.798075	1.93666	2.76885	-0.40419	-0.703259	0.0685753	0.385156	-0.352395	-0.0044903	-0.399744	-1.0565	0.226323	0.0269116	0.123802	0.270375
ENSG00000079739	0.739812	-3.38002	-2.18304	-0.737203	1.64331	0.119804	-0.382597	0.859235	3.14051	-3.67468	0.0503617	-0.843455	-0.627737	-2.0608	-0.0421257	-2.94441	-2.02794	0.171707	-1.72555	-2.52094	0.977406	0.290284	-0.113713	-1.19936	-2.23029	-0.567779	-2.10037	-2.2011	-3.05902	0.0749361	-0.197749	1.38406	0.858065
ENSG00000115306	1.55642	-3.34102	-0.560848	-0.72358	-0.432439	0.939672	1.18669	-0.940027	-0.338265	0.520112	0.906033	3.66774	-1.51825	-0.977963	1.13761	0.590688	-0.198458	-2.48029	-0.479947	1.89192	2.14928	1.10474	-3.3512	0.750728	1.26152	-1.83393	-0.071567	6.51106	1.86208	-0.176838	0.878926	-0.566415	4.66615
ENSG00000130313	-0.173999	4.3176	4.17504	0.423144	3.5386	2.46407	-2.0878	0.772232	3.19828	4.81295	-1.34292	-0.322444	0.621296	-1.23726	0.142495	-1.79405	-0.548444	0.811812	-0.679375	-0.712328	-1.67377	-1.11342	-3.95815	-0.428096	-0.48075	0.911661	-5.21721	0.976625	-2.20383	0.958775	1.08244	-4.81227	1.89918
ENSG00000153789	-0.134462	0.305158	-0.0991106	-0.0909008	0.272978	2.55864	1.62432	0.732587	1.05903	0.13683	0.00218856	-0.0322938	0.437144	2.83952	0.339129	0.31689	0.657633	0.198375	-1.27952	3.33274	-1.59314	-2.3365	-0.161698	3.7315	-4.88703	-0.214424	-0.216419	-0.068921	-0.0127607	-0.021363	-0.213206	-0.510221	-0.954938
ENSG00000206561	-1.18815	0.649892	0.842917	1.1494	0.50938	1.15593	-0.662256	0.0236374	3.47302	1.38099	0.190436	0.100005	1.09274	-0.348622	-0.951776	-0.799726	1.14584	-0.177908	1.34113	0.186049	3.48604	-0.435573	-0.288397	-0.59217	1.26978	-1.99618	0.547315	0.146337	-0.802385	-0.778331	0.800257	0.981827	1.24412
ENSG00000101190	0.510808	-0.410571	-0.26114	-1.4156	-0.562997	-0.546206	-0.611517	-0.634748	1.10549	0.496627	0.442309	2.02932	-0.741268	-1.66357	0.690784	-0.934129	-2.92283	-5.80223	3.67588	-1.56678	2.23347	0.347144	0.675028	-3.44801	-2.55015	-2.22346	1.27466	-0.158768	-1.95873	1.42904	-2.86493	-0.621172	1.09125
ENSG00000213672	0.450271	3.31311	1.87275	1.8252	-0.384448	2.08239	0.826855	-0.225439	2.6792	3.21279	0.151478	-0.641123	-3.4675	-0.408047	0.838911	0.340165	0.129573	-0.85564	0.0573657	-0.179471	-3.7167	1.22149	-4.02861	1.20654	4.78756	0.906971	-2.21566	0.964722	-1.38191	-0.140046	0.302609	2.22501	0.774734
ENSG00000176165	-3.46337	-3.02843	-0.0666056	-3.53893	-0.0989154	-0.552698	-0.802849	-1.85271	-0.0113131	-1.07576	2.01139	4.70892	-1.3403	-1.62628	3.73023	1.55396	-1.96871	3.75226	1.11904	0.892718	1.35837	0.777957	-0.0610039	-2.7174	-2.72583	-0.397013	0.50421	1.26867	0.81304	1.64643	-0.171078	2.86703	-0.171497
ENSG00000092758	-1.83091	-2.82403	-2.67765	-0.980164	0.942083	-0.613762	-0.4214	1.5674	-0.556536	0.217374	-3.90943	-1.10845	-2.6404	-0.620637	-3.23903	-1.23549	-2.75047	-5.95905	-1.20021	-1.54119	-4.11193	-2.27079	-0.356793	-5.38351	-1.80082	-1.30236	-1.32746	0.0756616	-0.169911	0.338775	-1.94784	-1.10244	-1.2123
ENSG00000111639	-1.74765	-0.577058	-1.17256	0.6844	-1.03067	0.779106	-0.720091	0.902642	1.64297	1.00144	0.369294	2.39025	-0.246198	-3.2051	-0.787706	1.34604	3.08027	-0.36399	-0.819231	-2.32409	0.81564	1.59063	1.85261	0.271995	0.019495	0.758715	-2.04784	4.83277	-1.3806	0.68931	4.81162	-0.876258	-2.92957
ENSG00000106617	-0.122076	-0.927262	-2.53206	-2.91781	1.29325	-0.309529	-0.368018	-1.80948	-0.247035	-0.75758	-0.0481173	0.167323	0.093187	0.582922	0.375225	-0.341863	-1.91236	-2.03671	-2.51829	-1.31432	1.13662	1.20064	0.597391	-0.919102	-0.559167	0.409156	4.22699	2.18115	0.423936	0.137615	-0.294697	0.392018	-1.75115
ENSG00000198246	-0.771169	-0.774849	-0.263609	5.61582	-0.615976	0.0124652	0.378666	2.83971	3.00997	-0.334289	3.53421	-0.955572	-3.03719	-0.430488	-0.0120303	5.03451	1.72872	-0.954235	-0.384299	-1.18246	0.231364	-1.99157	-0.431472	-1.94929	0.532684	-1.60199	-0.634817	-0.834975	-1.0372	4.00857	0.0292309	2.01136	0.47958
ENSG00000010292	1.48218	1.57185	-1.63908	1.79988	1.91639	0.865703	-0.536899	1.79037	0.980772	0.263949	1.01084	1.2773	-0.303355	0.0988887	-0.108095	-3.52672	0.616433	0.0487227	-1.59984	0.322744	0.101268	0.397256	-0.525767	-0.406717	0.0581453	0.419012	1.00894	5.76153	-0.598524	-0.37072	0.997153	0.485665	0.830137
ENSG00000239474	4.99768	-0.644455	-0.724504	-1.16934	-1.18788	-0.506013	2.7204	0.985643	-1.25717	1.65999	-1.29412	0.664239	2.51243	4.62185	-2.80513	-0.808864	-4.03968	-1.73329	4.13724	-1.73713	-1.81719	1.77004	-0.88841	-1.22142	0.742682	-3.23658	-0.141685	-1.10524	-4.83722	5.81031	-0.698359	-1.62288	-0.33417
ENSG00000106113	0.341377	0.0892809	-3.53025	-0.49808	0.370695	-1.87407	-0.218609	0.11734	-1.14474	2.46837	-0.52996	-1.65923	-2.61718	0.350874	-1.57954	-1.04767	0.502489	0.0030227	0.426686	-0.778678	-0.518552	0.260911	-4.49593	0.282111	-0.00704962	-0.375769	0.640185	-1.44338	-1.41928	2.96923	0.195442	-1.05041	-0.48369
ENSG00000146263	3.75595	-2.48434	1.21932	-3.03493	5.89362	0.0544261	2.00582	-0.78144	1.05037	3.83119	0.37272	-1.52504	2.79914	0.318263	2.26645	1.25929	1.04734	-0.325035	-1.24171	-0.9861	-0.629829	1.243	-0.972591	-0.625107	0.0199439	0.437163	-0.319487	1.7226	-4.53377	-0.0997868	1.01105	1.96217	0.61795
ENSG00000034971	-2.52102	-0.179671	0.267393	2.63549	0.323461	0.0297922	0.190662	0.637113	-0.47287	-0.195695	-0.0457204	0.300644	0.109177	-0.203154	0.158331	0.300088	0.31092	0.208271	-0.100689	-0.217982	0.194073	0.350828	0.592868	-1.15412	0.071504	-0.325809	-0.457238	1.03099	-0.183701	-2.3244	0.164979	0.0270599	0.118572
ENSG00000178171	-1.05743	-0.321754	-0.585231	-0.129086	-0.966997	1.01827	-0.781001	3.32104	-0.266057	-1.66956	3.7843	-3.4951	-0.98996	0.0850958	-4.69652	-1.51226	-1.14648	0.725194	-0.801814	-1.32384	0.833573	0.643364	1.63644	-0.568205	4.66275	0.244982	-2.42075	1.2285	2.88415	-3.88887	3.06745	-0.0867773	0.0810288
ENSG00000051128	4.75123	-1.24929	2.50654	0.989356	-0.0262624	-0.0669361	-0.780373	1.32826	-0.455482	-2.94007	1.07308	1.00674	1.69818	-0.572539	4.94667	-0.596644	3.5883	-3.65732	2.76932	-1.24742	0.682329	-1.08734	2.16871	-0.692391	-1.09923	-0.143662	-0.0443946	0.786248	-2.99264	1.26536	3.35416	-1.24715	-1.82534
ENSG00000145428	1.08781	0.949791	1.58693	3.04647	-1.83651	-0.0234898	0.214	0.818152	0.24795	-0.378917	0.173873	1.18769	0.402865	0.148502	0.764653	-0.564486	1.45339	0.571424	-0.366859	0.344357	0.407494	0.0334889	0.477883	-0.526723	-2.26571	1.37213	0.681328	0.41163	0.456652	-0.303936	-5.19286	-1.21685	5.20236
ENSG00000157168	-2.67213	-0.246461	-1.91577	-0.493328	-0.422313	-1.30813	1.42166	-1.10542	1.00232	1.59595	4.987	0.647783	-1.20654	-1.84379	-4.47878	-1.64824	-0.996133	0.950108	-1.20796	-0.896561	-1.13746	-0.905827	-0.821497	-1.29487	-3.11453	-0.192953	0.575539	1.4235	-0.0776051	0.596666	-0.820671	-3.13938	-3.60508
ENSG00000150627	1.61593	0.0468953	-2.20429	0.147107	-2.09493	0.658514	-1.88232	3.71806	-0.461054	-0.46998	1.43286	0.0973023	2.87618	2.15713	-0.964833	-3.33541	0.278511	0.45898	0.555718	-0.606736	3.54519	-0.14711	-1.15923	-0.174645	4.05152	1.20704	-0.400928	-1.49319	-1.12419	0.675912	0.353471	0.156917	-1.15736
ENSG00000138100	-0.446792	0.22801	-0.00026716	0.376283	-0.44421	-0.151568	-0.517615	0.317008	0.787424	-1.89061	-1.71996	1.09381	-1.09926	-0.00891498	1.33726	-0.586068	-2.12395	1.75528	0.329225	1.49985	3.52484	0.204203	0.38412	1.22574	1.26286	2.15626	0.263337	0.445876	0.504064	1.48776	0.619574	0.923992	0.848264
ENSG00000102882	0.7629	0.0818198	-2.8485	-0.0142112	-1.3567	-4.07964	0.136567	-1.89203	4.592	0.448951	-0.934638	0.421223	1.85372	-0.297699	1.55455	-0.480231	-0.103012	0.236555	0.288987	-2.83287	-1.76904	-1.23688	1.5829	-0.729601	-2.68827	0.457623	-0.576477	0.577853	0.434877	-4.23773	-0.0282724	-0.180305	-1.88999
ENSG00000099797	1.89741	2.93996	-0.715826	0.111831	-0.117206	6.22144	0.615091	0.357331	0.851877	-0.872393	0.340342	0.0549411	-1.50769	-1.89742	-0.697963	-2.55003	-2.24042	0.352449	0.119945	-3.50775	-1.37639	2.16024	2.38154	-0.347497	-1.85742	-1.9424	-0.343837	1.448	1.64606	1.46671	1.39899	3.44927	-0.912565
ENSG00000111269	-2.54146	2.60616	-0.186609	-1.28651	-0.699216	1.70955	-1.2797	-1.21895	-4.08037	-3.93814	2.45569	1.10601	1.46449	1.31876	-0.198567	-1.2435	2.89273	0.818972	0.732359	2.05065	0.984567	2.14216	3.86111	0.296581	0.898364	3.84423	0.852978	0.257499	0.382954	1.17227	-1.23871	-0.534408	1.00876
ENSG00000278195	-2.34258	1.0097	-2.06041	0.331416	-3.82645	-1.10371	-0.637751	1.18258	0.386333	-0.808289	1.23327	2.81503	-0.834813	-1.854	1.06924	-3.72795	-3.39761	4.10133	-0.205707	-3.93166	-0.188218	-1.24998	-1.534	-0.294413	2.26917	0.227154	1.3246	0.499366	1.68959	0.694808	-0.607814	-0.709826	-3.41509
ENSG00000145423	-3.71178	0.495948	1.01111	-0.966138	0.412591	0.267907	0.306266	2.83312	0.369081	0.0482467	0.474485	-1.54373	0.119317	-0.6418	-0.37498	1.34637	-0.245811	-2.25489	-0.47119	2.03476	0.68081	3.52691	-6.14962	0.575171	-0.521398	0.0277656	-0.188312	0.204683	-1.09671	-2.20447	2.49896	-0.0554055	3.03994
ENSG00000125966	-0.621778	0.273979	1.47451	1.52259	1.09716	1.55278	5.19062	2.37494	1.23212	-0.161228	0.732464	0.191024	0.780754	1.03929	0.291692	1.86983	1.03217	0.885278	-0.0802854	-1.52119	1.72666	-0.269359	1.12477	0.48883	0.987401	0.601054	0.821802	4.61299	-3.23262	1.70451	-1.27949	0.378133	0.143649
ENSG00000160191	-0.379292	-1.7126	-1.93883	0.233293	-2.66768	-0.74505	-2.38238	-3.09399	-0.0238014	-3.66698	-1.0194	-0.118523	1.01093	-1.25973	-1.8193	0.0822621	1.11182	0.912524	-0.876169	0.558055	-1.44849	2.22502	0.375105	-0.42428	-0.561202	-0.366071	-4.0795	5.12534	-0.201585	1.80888	-1.80986	-2.66816	-0.609464
ENSG00000101182	-1.3791	-0.807732	3.23757	-0.149426	-0.39692	2.68627	-0.543819	1.29163	2.13824	-2.29886	4.32306	2.37802	-0.489638	-1.2064	0.130544	-1.79776	0.0708589	-2.72169	2.69701	0.0620447	1.35764	1.52535	5.1658	-0.513521	-0.312082	0.246446	-0.303557	1.79124	0.949852	0.527259	0.533379	0.00270424	3.47359
ENSG00000183624	-1.13973	-1.17281	-0.219287	-0.264299	-1.23755	-0.519964	-0.0524174	-0.472992	-4.54026	-0.794667	-1.26584	0.201542	-0.673653	-0.969022	-0.42271	-2.11441	-2.53111	-2.06828	0.102936	-1.41541	-4.48868	0.0458935	-1.61787	-3.55137	-1.3591	-1.65701	-1.32594	-0.693257	-0.121974	-0.759233	-0.729079	-1.64613	-2.23262
ENSG00000137936	1.41262	2.64187	-1.10918	0.395657	1.21187	-0.619303	-0.383609	1.31517	-1.15453	0.146191	6.04254	3.36407	-0.556387	-0.71008	0.215419	-0.154359	-0.424354	-0.707134	-1.88771	1.31152	0.0932466	-4.62095	-3.25245	-0.329788	0.362808	0.975201	2.22594	1.05681	-2.04283	-0.141692	2.74897	1.67231	1.65017
ENSG00000159200	-0.662554	4.93124	1.78576	1.40993	-0.623242	0.285645	1.28413	0.0257828	1.65568	3.12084	2.06727	4.45842	0.333501	2.82256	0.985	1.02939	2.03637	3.10643	-2.10932	-0.914536	-0.639844	-0.796528	-1.6444	2.08133	1.87394	0.579655	1.30527	1.49091	-2.08157	0.593257	0.672236	0.333488	-0.00915054
ENSG00000174348	1.09108	0.07776	1.25379	-0.754728	-0.342287	0.173747	1.53346	0.208578	1.36777	0.441325	0.365253	1.81298	0.445884	-1.38353	-2.47376	6.61027	0.524454	-2.70012	-1.3295	-0.385276	1.54593	1.13987	1.43235	3.34058	0.679971	0.012196	0.744075	1.87245	0.455676	-2.72145	0.182398	0.431059	0.47784
ENSG00000163251	-1.94036	-0.890983	3.20069	-2.79711	0.208507	1.23146	1.78883	-0.544182	4.90356	1.2745	-1.93651	-4.27815	-0.913554	-2.54189	1.89715	2.28881	0.736713	-3.01627	-2.97967	-0.365414	-1.66	0.349447	-3.5116	-5.05873	-3.84042	-4.29061	3.75595	4.83733	-1.24314	-0.386634	-1.52544	0.479592	-3.31684
ENSG00000165125	-0.392636	5.28512	2.09003	-1.90066	0.222156	1.59129	-1.1509	1.00778	6.46187	-0.186317	1.85779	2.50738	0.222128	-0.873029	0.116255	0.451806	1.95238	1.17269	1.22619	0.480592	1.81264	0.71836	1.2393	-0.810804	0.942219	0.897336	-0.632924	-1.69734	-0.176287	0.0846096	2.66252	0.0409979	-1.28599
ENSG00000117533	-2.94455	4.11289	1.19158	-0.974716	-2.99152	0.335795	-2.27539	1.11555	-0.429604	2.69086	-1.21397	-2.92378	1.07811	0.802214	-1.32001	-1.16025	-3.76477	-1.74602	-0.153912	-2.92757	2.1083	0.529134	1.87425	-1.47808	-1.49269	-3.77212	-4.83709	-3.95177	0.140931	-0.0270231	1.76893	-2.5716	-0.385909
ENSG00000113387	1.05857	1.8628	1.5738	-1.18293	2.09849	0.00175145	-3.75089	4.05465	0.528568	0.741116	1.11733	1.84302	1.02083	-0.684772	-1.51323	-3.25421	0.30841	0.932227	-3.65212	-0.998409	-0.27416	0.692943	0.465473	-1.5254	-0.0551092	0.178405	-2.42015	0.399846	-0.704256	1.50069	3.98087	1.09514	-0.677723
ENSG00000170142	-0.407685	-1.27223	-0.457976	-1.84328	-1.87948	0.374208	0.262378	-1.65839	-0.0471081	1.32524	0.39522	-0.880528	0.983891	-0.788002	1.9145	-0.374643	-1.288	5.61621	0.316734	-2.10216	1.10251	-0.538476	-0.0862888	-1.44011	-3.65088	-1.46309	-0.636981	0.40844	-0.686886	1.14874	-0.886081	1.28969	0.651633
ENSG00000165406	0.400662	-0.864557	-1.53037	-1.96835	-2.5037	-0.601734	1.64763	0.265526	0.577291	0.945411	0.644062	-1.60821	-3.99828	0.71971	-1.97348	-2.63047	-0.407878	-1.15688	-1.88617	2.29973	-2.4718	2.1639	-0.476329	0.797315	1.79997	0.983244	0.643713	-0.697956	0.0357189	0.345786	-2.23977	-0.257356	2.18855
ENSG00000124507	0.170889	0.359887	2.24429	0.663865	4.56925	0.690123	1.57573	5.51804	-1.74623	-1.79554	2.05819	0.346267	0.664901	1.6796	0.46976	4.17812	1.40152	0.897951	0.610325	3.9325	-1.07505	0.867496	-1.87389	-0.0908322	-0.175697	0.568606	1.23233	3.65559	-2.59531	0.35168	-0.902131	3.72953	5.99855
ENSG00000144619	0.667074	0.916976	1.82655	-1.54252	1.6256	2.54321	1.63632	1.81607	0.337882	2.56873	-2.23286	-1.00858	0.533157	1.30891	0.513394	-2.38155	-0.628936	-0.111312	-0.771705	-0.129521	3.02389	-0.0784294	-0.833431	-0.0810175	-0.235567	0.597075	2.34508	2.87893	1.1964	0.0920889	-2.49746	2.97271	-0.828292
ENSG00000176209	-0.725089	1.61103	0.064896	-3.67966	-0.102211	1.79843	0.289531	-1.01126	6.55269	-0.881036	-1.14042	-1.18768	2.71314	0.408481	-0.237098	-2.51534	1.86474	-5.42541	-3.74199	-4.19682	-0.206261	0.368758	2.57597	0.493788	-0.19803	0.373797	-0.316535	-0.71004	0.651513	0.91482	0.661685	0.873777	0.380639
ENSG00000169231	-2.39184	-1.18823	-6.39132	0.537703	-2.19298	-1.76495	0.422907	-2.13525	0.669911	0.355175	1.91405	-0.29479	-0.63727	0.342342	-0.441589	0.984633	0.685947	-0.0567667	1.17235	-0.744597	-2.05659	0.494597	1.15889	-0.360232	1.24013	-1.5037	0.224873	0.680097	-0.968644	0.264429	0.0562193	1.25174	0.114115
ENSG00000166819	-0.776712	0.174229	-2.58239	-1.53389	2.15348	1.46966	1.98932	2.00497	0.263946	0.706462	0.719968	0.341914	-0.715864	-0.654567	0.701436	5.00554	3.07851	0.0298323	1.43345	-3.3365	0.628771	-2.96242	-1.28067	0.620595	1.12323	2.87882	4.5225	0.461934	1.0178	-4.33869	2.80212	5.50032	1.02261
ENSG00000181220	-1.67241	-2.40048	3.25921	0.228685	0.982484	0.847184	-2.33279	1.47498	0.803008	0.477729	-3.72289	-0.651908	-0.369424	-0.331518	-2.59854	0.733364	-0.138007	-2.66419	0.740532	-0.481724	1.14533	-0.207139	1.84685	1.88795	2.6703	1.88332	-1.4003	0.799165	-0.718684	2.61416	-1.57177	0.0990278	0.315344
ENSG00000172671	-0.414247	1.79471	0.910389	0.678116	-3.32431	0.0504636	1.52938	-0.251644	-2.73847	-0.598137	-1.52446	0.168864	0.584638	0.955547	-2.74972	0.111236	-0.485633	-0.309693	0.595121	1.19326	2.07228	0.328924	1.31144	1.02762	0.14144	0.898489	0.0309619	-0.683478	-0.538823	-0.551075	-0.160402	-3.07242	-1.27925
ENSG00000155792	-2.82627	-0.0174171	1.92824	-0.739815	-0.650369	-1.41119	0.245986	-2.72098	-0.122457	-0.954405	-6.55765	-1.86641	1.35099	-0.166277	-1.15373	-0.599699	0.375035	1.98264	-1.55228	-0.0709122	3.70316	1.25399	0.319459	-3.33453	-5.87267	-2.56006	0.690556	0.886906	-0.562026	0.22215	-0.794558	-2.39325	-4.76726
ENSG00000103460	2.0957	-3.80203	3.15804	1.12476	2.23217	-1.65511	0.614695	-0.794738	-1.10145	0.559109	-0.0474107	-0.938891	-3.38672	-4.57697	0.79424	2.25693	-0.413935	-1.41791	3.6532	-0.203767	1.17013	0.905665	-0.319416	3.91031	1.00172	0.375524	1.34209	1.68852	-1.53494	0.597562	0.208452	-0.218892	0.0201877
ENSG00000092850	2.32395	-1.16393	0.517594	-0.200348	0.933954	-4.58749	-5.22359	-2.53453	1.63236	5.36802	-4.71807	-2.49521	-0.755123	0.462326	2.25668	0.749103	-5.33595	2.04022	1.38911	2.21778	2.62994	-0.350553	0.1914	4.31959	0.854851	-0.989786	0.330188	0.969316	2.60118	1.21468	0.123285	-0.428809	0.0143725
ENSG00000111262	0.195971	-0.402286	0.0063182	1.47254	-0.534377	-1.67447	2.69202	1.01048	-2.83879	-2.62882	1.27291	1.12325	-0.0600943	-2.19771	1.3495	-1.063	0.901741	-1.11859	-0.512256	0.0081462	-1.55447	1.2069	-2.21823	0.39702	-0.661136	-0.184331	-0.761046	2.15154	-2.96553	2.48417	1.09085	-2.3151	-0.536392
ENSG00000174137	-0.795481	-0.0439947	0.273311	-2.40917	4.42674	0.891545	1.69614	3.4053	-0.0455266	-3.14073	-0.145266	-1.21644	-0.281482	-2.03533	0.155311	-1.00698	-1.02292	0.223616	-2.83141	-1.32694	0.134851	1.22048	2.27819	-0.852953	-0.849628	-0.738333	-1.1674	0.330892	-0.591921	0.72197	0.321797	0.157676	0.901177
ENSG00000131149	-0.934205	-2.14285	3.36256	1.54056	-0.745817	-4.67451	-0.810534	0.967806	4.82014	2.22787	1.76913	4.05839	0.103168	2.96534	2.26424	2.55829	0.376593	1.04308	-1.92124	-0.561485	1.61159	-5.17329	1.26338	-0.224201	0.410607	-1.20614	-0.861791	1.2075	-3.42062	3.01388	0.76264	0.265782	-1.72521
ENSG00000196821	0.992954	-0.250015	-0.195821	-0.202146	-0.770218	-0.207137	-0.306262	-0.452652	-1.28278	-1.04237	2.06584	3.83669	0.318035	0.308204	-0.180993	0.238351	0.0421715	1.68995	-2.05243	-1.9412	0.284735	-1.10861	-0.435072	0.00349518	-0.06731	-0.0356444	1.0519	0.940563	-0.965239	-0.787731	-0.757924	-0.683885	-3.31295
ENSG00000240972	-1.24619	-0.119512	0.664277	-0.656525	-0.10662	-1.92717	-2.56616	0.814846	0.370037	0.95802	3.66542	0.502349	0.47442	0.298749	-1.81752	-0.0389231	-2.8562	-0.54645	0.62179	0.978565	0.0368845	0.662143	0.246415	-0.527839	-0.416011	-0.0680891	0.638014	1.11609	0.241117	2.42382	-0.00840921	-0.479132	2.58967
ENSG00000231925	4.86955	0.931261	-0.938628	-0.0917381	-0.652203	0.715811	-2.52512	-2.39498	-2.48306	1.07372	0.0400787	-1.96172	1.02607	0.663481	-1.12359	0.157435	0.296938	1.01032	-0.228183	-1.23504	2.64108	-0.115648	0.156867	-0.68813	-0.293104	0.395966	0.590932	0.0390673	0.00506994	-0.323624	-4.00939	-0.736716	-2.33857
ENSG00000134709	1.31094	1.63249	0.689285	1.72807	0.45465	0.923621	1.04205	1.38448	0.57949	-2.40915	0.963518	2.99378	3.48571	-0.639536	0.260984	1.47162	-0.260153	-3.93936	-2.28313	-0.946757	0.216173	0.820006	-2.1844	0.248584	0.245278	0.490224	-0.605086	2.36406	-0.527409	2.19431	0.079948	-0.168076	-1.6561
ENSG00000158296	-0.127384	-0.0443097	0.152501	3.35295	-0.951079	-0.493925	1.18707	0.593241	0.664653	-0.10073	-2.1231	2.45193	0.123395	-1.82806	1.20521	-3.10403	0.527827	-0.015553	-0.0930673	1.92308	1.06925	0.376143	0.143721	-0.136735	0.0107768	0.293824	3.76757	3.37832	4.37402	-1.6501	0.889418	0.44408	0.122134
ENSG00000106066	-0.872496	-0.385229	1.33696	1.05398	-4.41569	-0.15571	0.4967	-0.102455	0.913719	1.21563	-0.549618	-0.302347	0.493571	1.33225	1.85191	5.357	0.23263	-0.362317	0.269146	1.13036	-0.384187	0.584227	-0.359577	-0.954417	-0.861891	-0.906415	-2.41521	-0.859495	-1.20009	-1.11033	-0.727173	-1.64017	0.279014
ENSG00000159753	1.00979	0.29968	3.73654	0.955619	0.360585	-1.39476	2.94924	0.960779	0.0697715	2.05709	1.45907	1.53951	1.43778	1.04334	1.20554	2.27492	1.16282	1.88574	0.285407	1.64904	-0.774396	0.938185	0.179851	0.203434	-0.146188	-0.00461821	0.550148	8.06126	0.132505	1.7174	-4.04292	-5.28194	-1.74464
ENSG00000107736	-0.402584	-1.47676	0.482846	1.67955	-0.756906	-0.119991	-2.39037	2.73255	-0.111822	-1.38411	-0.0875842	1.61433	-1.82166	-1.13703	0.205093	0.947291	0.513904	-1.83404	0.611885	-0.377777	2.57731	1.27956	2.09433	-1.52526	-1.57597	0.0523054	1.5865	2.94272	0.759967	-0.165149	1.08861	0.643543	3.09024
ENSG00000166436	-0.359907	-1.12896	-0.298826	-0.602057	2.75711	3.55873	-3.96328	-0.0219579	0.151182	-0.502652	-1.99686	-4.93023	-4.23353	-1.08511	0.268546	-0.985376	-1.77104	-1.34265	1.37442	-1.07684	-0.761587	0.392253	2.1448	-1.00124	-1.41931	-1.0682	-1.86886	-0.00607824	-1.82086	-1.11237	1.15941	-1.24532	3.68322
ENSG00000140873	1.02041	1.83414	1.59452	0.585383	1.11974	1.53262	1.15165	3.99767	-0.135937	-1.28908	0.981334	1.34405	1.6655	2.53328	3.19168	0.942024	2.03481	2.14185	3.29123	0.433546	0.666033	2.77986	-0.789994	4.05825	1.99825	1.88948	1.22136	0.53411	2.876	1.16414	-0.925909	-0.274049	1.32156
ENSG00000036448	-2.88809	-7.28201	-2.1687	-3.29412	-0.796364	-3.72317	-0.640609	-1.33965	-1.29094	-1.82631	-0.997116	-0.110634	-6.25051	0.269493	-2.76478	-1.57626	-1.82935	-2.65293	3.38222	-2.5858	-1.49414	0.120039	-4.38003	-5.61264	-0.846027	-1.78756	-2.12393	-0.474571	-2.37598	0.268052	-2.1772	-2.20401	1.00269
ENSG00000153064	-1.15755	0.910263	1.89322	-3.62226	6.03005	0.232214	-0.436896	-0.169706	0.725475	-0.280155	1.60085	1.26889	0.570395	-0.44517	-1.02144	-0.887683	-0.202658	-0.480588	-0.123393	-0.673192	-0.756929	0.151358	-5.32048	-2.72563	-0.717963	0.66705	0.902872	-0.854478	-0.747616	-0.840373	1.2541	0.509429	-2.1357
ENSG00000197279	-0.850712	-0.572193	1.04195	1.89914	-0.95097	0.251986	3.15708	-0.464907	-2.4469	0.116816	1.49353	2.91087	-0.40945	0.984333	2.07045	0.63003	-0.523839	1.42531	3.77497	0.175001	0.0757675	-4.50902	-1.53708	-1.22628	-1.46994	-5.23752	2.10963	0.141804	-0.1045	1.24746	-2.80567	-1.43513	0.448743
ENSG00000106605	0.0673118	-0.565069	-2.4081	0.58449	-1.0019	1.34038	0.0644796	-0.602804	-1.25765	0.429248	1.13635	1.12048	0.19023	-2.02054	0.930439	2.59914	-1.43023	4.4894	1.53976	0.0726688	-2.76158	0.981626	1.39103	-3.94126	-2.23533	0.51986	0.804154	1.82254	-0.443657	1.80942	-1.91994	-2.03867	-2.4368
ENSG00000215845	1.26302	-1.11956	-0.0211017	0.261834	-2.20667	-0.258381	0.869725	-2.47034	0.321774	-0.608858	2.06179	6.54769	0.927986	-0.182382	-0.280752	-1.57529	2.42122	-0.560991	0.574521	0.0207431	0.475732	2.29352	-0.374851	-2.29378	-1.35415	1.33112	2.03674	-0.381375	0.770207	-0.312511	0.13385	0.110189	-0.289364
ENSG00000053702	3.06524	3.48164	1.61937	0.433789	-0.572667	1.09351	-0.480143	-0.369606	0.856393	0.119407	6.56991	6.63403	-2.4166	0.555573	1.09727	1.34991	-0.0978289	0.134842	-0.103839	0.0634584	-0.950358	0.767355	1.45215	1.1315	2.05302	3.13509	-0.30151	0.922795	-2.25011	-0.735079	3.44034	2.21177	-1.70713
ENSG00000170381	0.200453	1.99611	1.67643	-1.12775	0.558781	-0.549294	2.50584	0.309798	1.72244	-0.625511	2.47195	-1.47854	-3.70247	1.80223	-1.23394	-3.59265	-0.667051	0.0439551	0.109123	0.151692	0.100313	-0.381229	-0.480475	-0.0727328	0.243217	0.440635	-1.25175	3.03539	-1.51351	0.699567	3.77086	0.870103	1.0418
ENSG00000169752	-0.0335897	2.58059	0.315562	-0.622729	-0.810822	0.0313137	0.468741	-0.334739	0.839716	2.08249	-0.684186	-3.12349	3.49695	-2.35304	-1.41469	0.138929	-0.959773	-0.52518	1.12609	0.00722387	-3.35213	-0.359007	2.46518	-2.53704	-7.40017	1.94282	0.779781	1.37486	0.182603	-0.0148713	-0.318607	0.761736	-1.7282
ENSG00000023909	1.66091	2.69868	1.54348	-3.60509	-1.36064	-0.888112	1.93191	-0.200698	-0.102505	0.674803	1.91994	1.71255	0.351363	-0.215064	-0.987923	1.69361	-0.0198783	0.711147	-2.15353	3.24643	2.03627	0.434456	-0.506465	0.83417	1.20308	0.838206	0.890897	0.581757	0.696221	1.31033	2.25985	1.09772	-2.89442
ENSG00000183617	-1.26468	0.0806006	0.625677	0.283978	-2.51396	-0.154564	0.479714	2.34446	0.307586	-0.760212	-1.62031	1.14806	-3.82349	-0.95655	-2.64153	-1.06481	0.929246	-5.14655	-1.20633	0.766578	-0.388468	1.00388	-1.04197	0.36821	0.280634	-0.0657492	1.70728	3.46999	-1.30513	1.46512	-1.51834	3.2121	-0.0605289
ENSG00000172771	-0.721747	-3.40065	0.354287	1.73744	0.238632	-0.334111	-1.27076	-2.45765	1.00676	-2.73211	-1.59659	-0.290269	0.93855	-1.00046	-0.268535	-0.150027	-0.393072	-1.89132	1.85745	-0.210504	-2.38414	-0.716926	-2.00324	-1.62975	-0.430213	2.0584	0.530938	0.771872	0.587515	0.0352896	-1.01227	2.66199	0.756281
ENSG00000111203	1.14763	0.0838081	0.719459	3.37437	0.22439	2.87342	0.441673	0.911098	0.427382	2.34727	1.70043	1.71212	2.27199	0.225895	2.21448	-0.518198	-4.07784	0.533244	0.572535	0.322051	0.660289	1.81718	1.38304	2.12627	3.6906	1.45293	-0.358841	0.0442764	-1.01869	-5.98515	0.819854	-0.472286	1.14861
ENSG00000152527	-0.13488	3.47893	0.181567	-1.20561	1.00064	-0.320472	0.247235	-1.83005	-4.33924	0.0234988	1.85565	2.10529	1.03505	-2.79968	4.64482	0.0286883	3.92577	-1.49611	-0.585474	2.05823	1.08878	0.429851	0.109495	2.22396	3.24881	3.32209	3.08301	-1.39203	1.88857	-1.19955	-2.40221	-1.31316	2.45017
ENSG00000184602	0.678174	0.459916	0.970052	0.997446	0.134096	0.731749	0.0425622	0.215259	0.72649	0.979984	-0.269661	-0.615302	1.21822	-0.524009	0.0152828	-1.66039	-1.09168	0.541041	0.204197	0.789026	0.0363905	2.24615	4.54539	-1.0443	1.02442	-0.692452	0.458947	0.507392	6.61827	0.434264	-0.922149	0.00956354	2.03019
ENSG00000141485	3.77033	-1.34446	-3.94555	1.83518	0.691034	-0.529011	-0.703336	-0.0901075	0.206188	-0.550355	-0.974063	-1.77263	-0.621701	-0.714092	4.50798	-0.263395	0.24695	1.50214	0.265251	-1.44662	-1.90495	0.739732	0.213214	2.11571	-0.482883	-4.54473	-2.50143	-0.459091	0.48092	-1.54679	3.1778	-1.01223	0.454853
ENSG00000196812	-1.48805	-1.6894	0.331477	-0.60781	-0.215876	0.148505	-0.207059	0.990269	-0.425533	-1.74509	0.3011	-0.789522	0.590082	2.99697	-0.814733	0.959289	1.74794	-0.570141	0.636026	1.52014	1.2617	0.170706	1.22015	0.2544	0.177561	0.95062	0.243822	4.59246	-1.13898	0.315279	-2.84104	-2.29433	3.14686
ENSG00000184544	0.332772	0.00354158	-1.0947	-1.22998	-1.83796	1.12892	-0.615717	1.46687	1.42742	-1.88555	-3.38935	-3.14402	2.84054	0.628306	-1.00274	4.08466	2.30578	0.0868524	-1.63954	0.139547	0.82768	0.914133	3.21768	0.701009	0.727102	0.491404	1.39487	1.18257	1.23886	1.26089	0.329771	4.18954	0.293866
ENSG00000187634	2.34531	2.02758	1.61451	-7.33553	-0.0581171	0.954795	0.711018	0.28566	-2.00742	-0.789309	2.40713	1.43064	1.79714	-0.0438875	2.80651	0.0635938	0.259019	2.342	0.146767	-0.72684	4.75441	2.49188	0.929923	4.95831	0.107657	7.62624	-3.79081	2.28845	-2.84703	-1.61878	1.8707	0.700014	0.603859
ENSG00000116128	-0.67157	-1.19513	1.94139	-0.910337	-1.63522	0.752853	1.81812	0.352335	0.958486	-2.10395	-1.79262	1.08705	-2.01389	3.5456	-1.33741	-0.0893433	-0.189125	-3.11277	-1.30521	-0.153215	-1.72853	-0.470167	-0.806526	0.119336	0.964646	-0.226016	-0.0521929	0.95578	2.44132	0.229058	3.40351	1.88947	-0.988135
ENSG00000182568	1.70675	0.719132	0.901651	0.540425	3.1784	0.904723	0.352414	1.46603	-0.342141	0.205224	-0.0366884	0.0345365	-0.0872214	0.604088	0.454294	1.7077	0.358237	1.60045	-0.02421	-0.139748	0.737461	0.751993	-0.279772	1.8647	0.887039	0.533451	0.98668	0.283919	1.23062	-1.2786	0.398576	0.0786035	0.49975
ENSG00000034053	-0.295255	0.965632	0.398396	-1.09432	1.21684	4.25549	-0.403148	-1.58786	1.41367	1.33262	-1.81709	-1.1353	1.03644	-0.083202	-3.02832	-0.333641	0.135089	-1.70511	0.239348	0.660077	-0.256103	-0.0136859	0.772937	1.12598	0.433717	0.595815	1.62199	-1.21001	2.08612	-1.97409	-0.854976	-1.07932	1.26065
ENSG00000183248	-0.845096	-1.97038	1.38904	0.124823	0.363678	-0.670588	1.52878	4.43087	0.323301	-1.23175	0.197216	1.31689	1.08838	4.95787	-0.781596	0.38819	3.7475	-0.586761	5.49995	-1.14364	0.390806	0.630735	0.00839066	0.128316	-0.575544	-0.0358245	-1.41326	0.747996	-0.904317	0.108477	-2.85341	0.232732	-0.703269
ENSG00000150051	-0.604058	-0.852926	1.08981	-0.907731	-0.957432	0.233085	1.09561	1.2024	0.280881	0.0639182	0.0768683	4.22759	-1.71586	0.665844	-0.125171	1.2591	0.70183	1.71399	0.020789	0.171148	-0.597677	-2.86593	-0.22904	1.52973	0.221214	-3.14189	0.625108	-0.172809	-0.639093	-0.30318	-1.42548	-1.10215	-0.628527
ENSG00000049759	-3.8754	-2.51243	4.8961	0.417774	0.0179179	1.7469	0.592049	-0.28923	-1.29534	-1.43624	2.56976	1.96446	-1.16724	3.12701	-3.54081	0.0589925	-0.309108	-0.612816	1.82344	-2.65877	0.650149	-0.285907	-0.13252	-1.79869	-4.24899	-3.61472	1.86517	-2.64229	1.53242	0.0724622	-0.797768	1.67532	2.95958
ENSG00000144136	-1.81219	-0.530781	-3.38665	-0.746863	-0.0605231	0.814738	-0.540085	0.46404	-0.316663	0.930336	-0.104895	0.71381	0.967704	-1.38969	2.18212	3.54519	-1.50005	1.03705	1.29977	1.44212	1.64454	0.974419	0.567509	0.464952	0.766351	4.94999	1.60749	0.793522	1.54749	1.08601	-1.81575	-1.45871	-3.35759
ENSG00000157873	0.5069	-2.33069	-1.20727	-1.80643	-0.697478	0.920191	-1.2168	-0.414003	-2.14024	0.167781	-0.634504	-0.45029	-1.18605	-1.92886	-0.407654	-1.6698	0.839695	0.69304	1.92494	-2.21562	-0.590202	3.72623	-1.46854	5.94377	-0.514268	-4.05511	-1.13811	2.12946	-1.7434	0.107818	-0.807538	-0.459036	-0.209349
ENSG00000100242	-0.247611	0.667496	1.0176	4.70772	0.423577	1.65992	0.113001	2.38176	0.604193	-4.51258	0.158631	0.206809	0.541841	-0.258973	0.363415	1.59178	0.751334	-0.31632	2.17332	-0.539379	0.638944	0.596698	0.71677	-0.404019	-1.15327	0.310141	1.32945	1.25881	-0.824066	2.60664	-0.211382	-3.18491	1.22088
ENSG00000152061	1.09135	-1.89981	-1.11026	-0.897807	-0.563447	0.388651	1.2606	-0.702193	0.468186	0.596353	0.913936	3.01171	-0.727133	-0.846465	-0.671172	1.95352	-0.191157	-0.622872	1.1307	0.146439	0.300175	1.4945	-2.08301	-1.22719	-0.760174	-3.53646	1.13041	-3.85398	-0.555776	-0.974269	0.809531	0.291217	0.626806
ENSG00000182175	-0.104079	2.1165	1.32909	0.535348	1.17561	1.54041	-0.415717	2.31574	0.903223	0.580029	3.11031	5.28916	0.230659	3.80545	1.67214	0.0314375	1.18636	2.65792	0.126701	0.234915	3.87562	0.378256	0.696894	-0.383659	0.737721	1.52334	2.21492	1.86994	1.70945	0.178724	-0.210902	-4.87131	0.533097
ENSG00000116863	1.65815	-0.0399754	1.47374	0.393786	-0.107309	3.80574	-0.371161	-2.60618	0.461266	-1.85741	-0.384172	-2.8642	-0.127575	-1.07792	-0.294896	2.16224	1.69801	-0.377777	2.95441	-1.9599	-0.0847762	0.492876	-1.76637	-0.283241	-1.03036	0.355011	1.59172	1.28962	-3.81324	1.78998	0.0454966	0.0391995	4.54452
ENSG00000181240	5.43554	0.362778	1.64017	0.378144	0.0764155	1.01073	0.408968	0.154159	1.29648	0.431501	0.30252	-1.3096	0.451422	1.52799	-2.27247	2.84542	-0.990606	-1.74477	-0.487022	0.825762	0.691524	0.764937	-0.191259	-0.865039	1.80348	3.37657	-0.926725	3.46594	-1.68733	0.0348081	0.760752	0.508918	2.01311
ENSG00000115252	-1.00421	-2.97987	-1.2328	-0.727556	-1.33815	-0.145942	-1.71989	5.5426	1.01111	1.23431	-1.14518	-0.417076	-1.3006	1.51406	-0.565883	-0.570945	-0.418392	0.344077	-0.245066	-0.0917805	2.17435	-1.21196	-1.51144	-0.458489	0.0292434	0.110198	-0.589566	3.66858	-1.24224	-0.130081	-1.76265	-0.671101	4.82837
ENSG00000111271	-0.675794	0.26226	-0.313014	-0.546317	-0.421669	-4.69939	-0.933006	-0.743996	1.57059	-1.73759	-0.0968076	-1.01186	0.616985	1.59346	0.769491	0.388459	0.498626	-1.98977	-0.47376	-0.45755	-0.74661	0.232074	-0.258616	1.55927	3.60885	-0.00363855	-1.05229	2.36983	-1.50379	0.544525	-2.02256	-1.11442	-0.366489
ENSG00000143194	-1.1895	-0.933502	-0.416261	-1.61178	-2.2676	-0.512757	0.4639	-2.49526	-2.78883	-1.62985	-0.635069	-0.559909	-1.10859	-3.84493	-2.26911	-1.50675	-2.362	-1.07233	1.58631	-0.153818	-0.516044	2.6724	3.98889	-2.83239	-3.55289	-2.83104	-0.164982	-2.038	-1.00396	-0.0996082	-2.69754	-1.59781	-0.731105
ENSG00000114013	-4.72953	-0.365101	0.854929	1.6624	-2.71795	1.74311	1.31674	0.207324	-1.27334	-2.15125	1.0836	0.243528	-2.90697	-1.80506	-0.760545	0.175974	0.626316	0.649435	-0.897311	0.629656	-0.846683	-0.128512	0.679071	-0.0038166	-2.72779	-0.20234	3.70744	2.24762	2.14397	0.752147	0.282956	0.390151	4.26498
ENSG00000173269	0.0168151	-0.58254	-1.07824	-2.06935	3.66732	0.0229908	0.0870764	-0.798946	-0.200955	-0.0796799	1.59862	-2.39969	-1.34352	-3.20276	-2.84772	2.60602	-1.83878	1.13134	0.13826	0.894815	4.82017	-0.929858	-5.9574	2.62429	1.37251	-1.14953	-3.11799	2.12614	-1.50078	1.57528	-0.101729	-0.536127	-0.0523533
ENSG00000159212	-0.312186	-0.319668	-4.22296	-2.88021	-1.35844	0.263204	2.40018	-5.57331	0.0374382	2.19695	0.832358	0.0569907	2.73879	0.821103	2.54568	0.109184	1.1227	-0.191419	-0.573532	0.215585	1.26107	0.42076	-0.617552	3.22201	-0.278532	-1.97926	-1.92047	0.444223	-1.27164	0.582788	-0.0287156	-0.85416	-1.3775
ENSG00000115758	-1.12532	1.22419	1.66925	-0.941954	0.650319	-1.56059	1.42127	0.190222	-1.01488	0.924094	-0.0219903	1.97142	1.87863	-1.14792	-1.30545	1.32057	1.39642	-0.153122	0.0183967	0.635766	-1.62526	0.486161	-1.06677	-3.02066	2.16858	1.58582	1.01437	-0.0594227	-0.462431	-0.135687	-1.01836	0.211263	-2.59013
ENSG00000197872	-2.48037	0.253119	0.0233977	0.175984	1.37033	-0.614645	-0.980147	1.96324	-2.96344	-2.7441	-0.16278	1.42969	-0.131169	4.44153	-0.441539	-0.608918	1.95462	-0.37659	-0.0311221	-1.69282	0.570261	-0.885531	-3.04374	-0.300683	-3.70486	-0.103083	1.03854	-0.248537	5.61838	-0.00579286	-2.63603	-2.81119	-1.15149
ENSG00000070610	0.646894	1.5156	1.64479	-0.109058	2.06436	1.22387	1.20179	0.341612	2.48557	1.19528	-1.38612	0.127949	0.376029	-0.45683	0.411166	0.177286	-3.75499	1.76552	1.59426	-1.62675	2.83231	3.5539	1.70774	0.118535	1.9311	3.7953	0.00610187	0.523732	0.797152	-2.6931	0.885987	3.0977	-0.22856
ENSG00000124749	-1.04018	-0.0291697	0.931504	-1.08526	5.67587	-2.86612	0.540793	1.23517	-1.73231	-4.90985	-3.87796	-1.34982	-1.80291	-2.17631	-0.155946	-0.493074	-1.28477	1.18976	2.05179	-1.51339	0.810795	-1.22104	-3.57926	0.711209	-2.63547	-1.18305	-0.354614	-1.86054	-5.05527	3.14847	0.544455	1.44574	0.529439
ENSG00000197956	0.0973075	-0.167102	-1.486	-0.748071	-0.402084	1.81414	-0.0232416	-1.00103	-1.49847	0.16513	-2.08269	0.0878499	0.271311	-0.801175	-0.427896	-0.2048	-2.3215	2.02722	1.4934	0.223408	-0.369568	-0.507439	-0.703727	-0.520452	-0.257908	0.0387255	1.45241	-2.74712	-1.04117	1.33455	0.646656	-4.11289	-4.62274
ENSG00000177989	0.123575	-0.205637	0.821952	0.049641	1.10791	-2.38334	1.91285	-0.294167	1.07716	0.687369	0.918801	-0.526816	0.867695	-1.54884	1.00667	-0.214834	-0.375588	-0.408329	1.24986	-0.60567	-0.188826	-0.83566	-0.373006	-0.235169	0.45259	-6.3825	0.0161741	0.732538	0.892449	1.19744	0.477227	-1.94547	1.09433
ENSG00000025770	2.75186	1.37228	1.86225	-0.496959	4.43587	2.14161	0.990734	2.54935	1.99058	1.55676	-0.0625528	-2.43147	0.00381416	-0.339504	-1.73958	0.486526	-0.15615	-1.18121	0.41786	-1.00529	-1.00735	1.17589	0.608915	0.38927	0.0907052	1.95882	0.0875489	0.826748	-0.0998692	-0.522916	-0.269666	-0.570279	-0.405032
ENSG00000104140	3.64776	1.55097	1.46199	-0.58831	1.03677	4.6231	0.126448	3.14704	-4.06141	1.31458	0.0493527	-1.85045	-0.195874	-0.996029	-0.00829274	-4.15016	0.250398	0.142273	0.941989	-0.220941	-0.48005	1.70092	0.43649	-0.849698	-0.177196	-0.0723827	-0.455388	1.28133	0.258827	0.0904164	0.276268	-0.338456	-2.59038
ENSG00000012822	-0.253511	-0.011808	0.816215	5.01164	2.55083	-1.31002	2.16128	-3.04227	-0.136426	-1.12805	1.56859	2.20071	-1.92447	2.06298	-1.09349	-0.304246	0.917118	0.478574	-2.41993	-0.227003	-0.449643	0.072871	0.060323	0.912868	0.853065	-3.91731	-3.49319	1.07079	4.20573	0.9246	-0.811267	-1.16143	-0.811513
ENSG00000111412	-0.527219	0.652101	0.426754	0.441938	-1.85948	-0.226131	-3.8377	0.129664	0.686068	-0.0910611	2.14609	1.33799	-0.363044	-0.654658	-0.777116	-0.939644	0.249494	2.7878	-1.96209	1.37775	0.0806108	0.225996	0.250792	1.3495	1.75362	1.14051	0.81799	-0.577223	-0.41528	0.0144738	-0.0880136	1.36913	-0.32478
ENSG00000127483	1.08349	0.344532	-0.178077	0.500332	2.90897	5.28889	-0.14158	-0.333396	-0.338856	-2.58317	0.26359	0.494069	0.20174	1.24869	2.72245	1.19517	0.364839	2.74222	2.69487	1.30542	-2.4382	4.1698	-1.16886	1.96642	1.90172	0.157029	1.16131	3.61034	0.0964007	0.697878	-4.48363	-1.52304	-0.057281
ENSG00000075234	0.106317	-0.27243	1.17286	-0.900082	0.0854943	0.153188	-3.22539	-1.40981	-0.146485	-0.603936	-0.123149	-0.343461	-0.0441935	1.41986	0.219873	2.72813	0.506713	-0.349006	-4.52104	0.747844	-0.40974	1.69094	-1.04757	0.127266	0.150983	0.229496	0.0721243	1.59203	2.77976	-0.491364	0.647551	-0.110044	4.2347
ENSG00000147454	1.73916	3.14177	-1.10545	-2.16091	0.291492	-1.38487	-3.03701	-0.360702	3.06679	1.32992	-1.12799	5.08687	-1.73651	0.0837956	-0.529797	0.331539	1.30083	1.30364	-1.47333	-2.97285	-0.153327	1.31496	0.194895	-4.05255	-0.21169	1.48846	1.98781	2.68587	-0.110586	-0.263399	-2.51495	-2.20011	1.2112
ENSG00000186298	1.38156	0.427257	2.25441	0.496667	-0.8627	-0.735916	1.3619	-2.83875	-3.20261	-0.165027	-1.41208	0.544557	0.00396837	-3.20291	-0.453155	-0.344836	1.20637	0.297028	-2.63316	0.902749	0.282746	1.28383	1.43607	-0.674499	-0.83932	-1.77622	-1.02249	0.376935	1.68031	0.403524	0.650543	3.18354	-0.00878438
ENSG00000100994	-0.729641	0.0787699	-0.119051	0.0035918	-0.814145	-0.299069	-0.624485	-1.81961	0.938447	0.980999	-4.88692	1.0273	2.90399	-2.54608	0.341139	-0.92017	-1.10029	-4.11303	-1.02908	-0.451276	-1.91845	3.89657	0.255004	-0.920992	-1.06022	-1.22127	-1.79088	-0.617086	0.250585	-3.15777	-4.38683	2.52696	-2.17571
ENSG00000213918	-0.798608	3.12998	0.0265383	-0.517995	-0.225169	2.20989	-1.06899	-0.109358	-1.62076	4.82621	1.11105	-0.743943	3.25969	2.22794	2.4898	-1.5076	0.76355	3.00213	0.160063	-0.156457	-1.124	-1.54468	0.631588	2.87187	-0.542144	-1.99472	-1.06582	0.554451	-0.420446	0.869868	-3.18013	-1.28254	0.685254
ENSG00000167034	-0.972129	0.510918	1.71932	-2.77425	-0.291416	0.395107	0.899028	1.31844	0.914934	0.910174	1.15161	-0.0874065	-0.00694904	0.533029	0.608703	-2.23963	1.4466	-2.05164	1.72544	-2.54739	-1.6199	1.03452	-0.0799234	-0.989345	0.612461	1.52902	2.87833	0.628373	0.654303	0.106478	1.75664	-0.814086	0.810868
ENSG00000130414	0.528823	2.32296	0.0388777	-0.764746	0.68383	-3.71208	1.1749	-1.48296	0.65955	-1.49023	-1.10784	-2.58197	-0.635115	1.15126	1.38695	-1.80614	-2.90897	1.81978	2.4843	2.19702	0.450154	-2.30969	1.20415	0.709169	0.989644	2.18794	-0.870455	2.90791	0.877756	1.08133	0.134676	-0.265767	0.143507
ENSG00000075213	2.89828	2.42872	-0.132779	1.03818	0.175389	0.575812	0.220099	0.991891	1.41281	3.36111	0.478926	-4.67547	4.61463	0.912887	-0.349933	-5.69043	1.36294	1.29476	0.132667	-4.05066	-0.331881	-0.273519	-0.11656	3.15116	-1.83	1.9564	-2.74397	-2.92849	-1.22319	0.146415	0.507787	0.8511	-0.234787
ENSG00000107341	-1.74505	-2.68756	-1.47559	-1.03017	-2.03428	3.65426	-2.58909	0.30354	2.51659	0.802105	0.48154	-0.387485	1.48668	-0.692128	0.293921	0.347504	0.980847	0.895296	1.09424	-0.191195	-1.12952	-2.96349	-2.04249	-0.798516	-0.906136	0.27575	-0.808467	2.10977	-1.42071	0.579353	1.91363	0.942341	-3.35409
ENSG00000171812	0.797201	-0.249016	0.562711	0.86093	-0.383531	-0.196489	-0.393708	0.590146	0.282974	0.146697	0.41951	-1.43994	-0.17372	-0.330759	0.16626	2.14739	-0.859779	0.303094	3.31685	-1.80319	1.1711	0.457189	-0.27353	-0.706498	3.86968	-0.658371	-1.44121	0.459801	-0.435761	1.88228	-0.473411	-0.231964	-0.0120174
ENSG00000060237	-1.08281	-0.35907	0.741962	-4.75816	0.547146	1.5654	-0.252047	0.920792	0.0402395	0.352867	1.85615	-0.281581	1.64897	-0.111775	1.26528	-1.22562	-4.43114	-2.07342	1.04929	-0.557961	-0.204714	-1.46434	0.0438139	0.264409	1.00724	-0.0427667	-0.285	4.30944	1.39128	1.69729	-0.91119	1.67616	-1.19235
ENSG00000013810	-0.411818	0.0366883	-0.326488	-2.18777	1.0025	1.28609	2.19451	-0.772018	2.59269	3.42221	-1.71857	0.565482	-0.155295	1.62576	-1.88823	-0.226115	-4.9922	-3.77162	-0.093476	-0.685684	-0.592436	-1.13265	0.799647	-1.60482	-1.58199	-1.42196	4.54212	-0.628479	-2.26657	-5.83191	0.683983	0.245158	1.1986
ENSG00000174938	3.91536	0.650412	-0.681054	0.118048	0.0845217	-0.517619	-0.344844	-0.186168	2.35422	0.20467	-1.43188	0.717529	3.14577	-0.449791	4.11998	3.27234	0.338359	-2.32467	-1.76344	0.379035	0.0745277	0.84595	-0.287944	0.0106344	3.83293	3.29963	-2.17133	1.54098	1.2617	0.129712	-5.58333	2.62201	-0.378383
ENSG00000124641	-1.46467	0.40355	-0.0658849	3.42722	3.73543	-2.57433	2.1787	-2.1537	3.18895	1.69449	-0.00473463	-0.163253	-0.0236791	0.0860141	0.133112	1.15267	0.290903	0.749442	-0.725332	-0.160478	-1.40145	-0.40913	1.30833	0.51429	-0.257149	1.02575	-0.409233	1.7407	0.193427	0.669301	1.12702	-2.00408	-1.95144
ENSG00000164237	0.463454	-1.53831	-0.366083	1.39134	-0.883768	0.145886	-0.399038	3.40399	0.00770727	-0.71026	-2.23638	-0.527684	0.335895	-0.129895	-0.418942	-1.75594	-0.900651	-0.869472	-0.347672	-1.14774	-1.164	-2.36304	-3.07877	-1.61066	-0.107541	1.78267	-1.2082	-0.835571	-0.261875	-2.11056	0.279887	-5.27823	0.0465958
ENSG00000170275	3.26581	-0.452441	0.168114	3.18506	0.332288	0.472877	1.51106	1.02694	-1.86495	-1.55091	-0.0167475	2.13353	0.41467	-0.135285	0.460953	3.21556	-0.0461063	-0.168618	-1.16919	-0.842652	1.71688	0.103464	1.35949	-0.642839	0.591361	0.177946	2.56217	1.6336	-0.38844	-2.10941	-0.227766	-0.537747	-1.91351
ENSG00000157500	-0.541099	-0.48804	-0.885918	-0.683927	-0.0761308	0.954693	-0.0613431	-0.0461207	-0.825201	-0.566107	-1.54714	-1.36925	0.656616	2.07792	0.142334	-0.176682	0.275133	0.874699	-0.25317	0.113683	1.45074	-0.323595	-0.0525172	0.430327	0.815398	0.155907	0.00363662	-1.94222	-0.183027	0.208054	-0.121608	-0.12137	1.126
ENSG00000102699	-0.797003	1.29612	0.55439	0.699057	-0.118381	-0.100697	-1.39246	3.58975	1.29376	-2.19775	-0.133795	-0.799893	-0.146157	-0.34744	-3.42883	-0.392077	-3.52992	0.279275	1.55709	0.862482	-0.536571	0.693512	-3.70496	-0.833149	-0.402882	-0.874612	0.299638	3.0489	-1.50119	0.134056	-0.420526	0.240666	1.03813
ENSG00000155265	1.19039	-3.92154	3.18958	-6.29793	-0.343738	1.35948	2.08095	0.473317	1.64345	0.546925	-1.23569	-0.439558	-0.179212	2.41888	-2.79775	-0.172169	0.59703	-1.50375	-0.463586	2.66827	-1.67225	1.73949	1.59584	0.165521	3.32828	-1.94574	-3.03919	2.22752	-0.336447	4.2714	-0.797481	-0.264047	0.913048
ENSG00000095713	-0.867677	-0.620864	-0.587402	-2.97169	-2.03315	0.520884	1.2029	-0.599573	4.03503	1.4911	-0.510255	-1.26401	-1.77454	1.67564	-0.298474	-1.26081	-2.47825	-0.55916	-3.87378	-1.65862	1.94151	-0.576282	-0.338275	-0.0313877	0.839906	5.53774	4.89007	-0.90434	1.67891	-1.61191	-0.524579	-1.66682	0.356202
ENSG00000133116	0.847635	0.753381	-1.9834	-1.83486	-1.80422	-0.760651	-0.566299	-0.993036	0.519673	0.667047	-0.573075	-0.680471	3.01037	0.0861283	2.42536	4.44862	1.69799	-1.55967	-4.08984	-0.880301	-3.90569	1.38782	0.17386	-0.690411	0.219812	-0.521721	-0.460605	1.49545	0.267394	-1.32246	2.13734	3.60668	4.22794
ENSG00000205744	-0.318749	-1.41854	-3.38351	-0.421663	-0.681187	-0.235473	-0.554061	0.544652	2.1693	-0.454429	-1.64936	-0.873659	0.994256	-1.68922	1.8167	-5.08187	-1.45067	1.8804	2.77843	1.46719	-2.27261	1.14057	2.41684	3.43878	1.24578	-2.8188	0.183248	4.72541	0.0257926	-1.67358	1.35959	-1.06393	-1.38044
ENSG00000156170	3.33361	-5.10513	1.82037	0.11987	-1.44458	-1.04837	-0.0104942	1.91289	-3.59551	-1.66873	3.16039	-3.06408	-1.60252	-4.53937	5.5005	-2.83296	1.04292	-4.40542	1.10357	-1.49537	4.34285	1.16929	1.06986	-0.923485	-0.374947	2.90258	-1.18132	-0.530401	-0.00553425	-3.80458	2.60583	-2.55668	0.31782
ENSG00000163913	-0.693457	0.208725	-4.0641	0.17152	2.2222	2.91816	-0.921408	0.836211	0.777461	3.47141	0.732211	2.92199	0.283026	-1.83675	0.745375	1.16951	1.56476	0.523121	0.445244	0.128594	-1.43669	0.171981	0.281678	-0.642561	-3.34117	-0.0989964	-0.3221	1.40263	0.337923	2.26005	0.514921	-0.141708	1.3836
ENSG00000159433	0.861394	-0.0166943	-0.994317	-0.160673	-0.724417	0.855855	3.63706	3.31348	-0.735235	1.51914	0.186698	0.174687	-2.00927	-2.76094	-0.15159	0.376196	-0.494558	-0.991363	1.31276	0.597592	1.67141	-0.0600655	-1.30818	-1.79196	-0.400927	-0.363408	-2.21433	0.234321	-1.60992	0.913602	-1.10945	-0.801801	1.45357
ENSG00000196154	-3.27001	-0.72168	0.474653	-0.517287	-1.12187	0.0230554	3.17175	0.354283	0.281504	0.190432	0.266297	-0.0607021	-1.4604	-0.155911	-2.23024	0.470052	-0.0649996	0.139896	-0.942011	0.05702	0.118028	3.90119	0.317162	-0.942979	-0.734691	-0.105366	-1.06241	0.34152	-2.34767	-0.569593	-0.786915	-2.47286	-0.37388
ENSG00000133121	-2.11234	-0.622099	-1.50018	-0.760368	0.299909	-0.253639	2.09075	-1.37237	-0.921736	-2.61634	-0.670168	-0.464137	-0.725747	-0.783747	-0.404967	2.21665	0.538484	-0.265594	-2.21454	-0.760601	-1.69261	-1.18225	-1.409	-3.82519	-3.2838	-1.0105	-1.50402	1.18867	-1.53522	1.95461	0.160259	0.0712894	1.8839
ENSG00000260001	0.57198	0.157582	0.274154	0.693591	1.03202	0.380441	3.24786	2.88312	0.782572	1.03362	1.60785	0.76659	0.222209	2.1569	-0.0279405	-1.04209	-1.31457	1.71225	1.80914	-0.0797975	-3.96797	3.64186	0.407098	4.41278	5.61719	2.55085	1.11073	2.78295	1.01367	-0.32104	-0.143013	0.141883	1.49478
ENSG00000171962	-3.5563	-0.939502	-3.76089	-0.156584	-0.410924	0.475928	-2.12018	-4.82028	0.00379368	-3.21521	-0.362475	-0.150709	-0.392983	-1.75102	-0.926555	0.24678	-1.56052	-1.57608	0.8253	1.13015	-0.773114	-0.430719	-0.843255	-1.00016	-1.07024	-0.152143	-0.973258	0.680102	0.491065	1.9118	-0.243421	2.12307	-0.290281
ENSG00000078967	0.510822	-0.844238	2.28196	0.879328	3.40752	-0.631461	-1.57142	3.19419	0.777234	-0.0177327	1.37662	0.349949	-0.0624115	-2.56181	5.17486	3.11175	-0.79037	-0.174496	6.11098	0.645227	-0.73545	-0.405049	-0.455515	-0.140573	0.323178	-3.36275	0.475822	0.987597	-0.12877	2.45861	-0.663535	-1.68367	0.483487
ENSG00000188921	0.191604	2.03611	3.91024	1.10693	-1.63437	0.521279	0.106508	-0.0565812	1.05676	1.76755	0.300093	1.54136	0.0994671	-1.70539	2.32232	-0.297498	0.39977	1.66681	0.654685	-0.492732	0.116129	-1.95737	-0.44697	1.09847	1.13301	2.24434	-0.61416	-0.676363	-0.861699	0.270836	-0.357751	0.230291	0.128159
ENSG00000005108	-0.335558	-1.59585	-0.126272	-0.702258	2.08008	1.44284	0.630906	-0.995539	0.361269	-0.374985	2.16583	-0.212394	-0.782596	1.52795	-0.681962	0.432429	0.0883258	-2.52743	-1.43883	0.122526	0.45634	0.341167	0.465011	-0.164568	0.0970736	-0.0167688	0.141982	-0.168651	-2.11731	3.93383	0.815004	-0.281555	-0.394343
ENSG00000163273	3.2519	0.769833	2.80291	-2.17175	5.55488	1.52599	-0.44396	2.11356	0.159255	-0.354983	-1.38531	4.56555	1.87008	2.20162	0.322334	0.125564	0.183796	-0.152197	-1.33463	3.57294	1.29982	0.77156	-0.304814	-2.7166	-2.40077	0.940531	0.941743	-3.52734	0.307529	-2.30445	0.108087	-0.0744611	-1.9141
ENSG00000102981	-0.150275	-0.421746	1.10553	0.758601	-0.792435	1.83862	-0.491843	-0.427991	-0.67757	-3.16218	1.13024	1.35328	-2.54737	-2.86451	0.725557	0.844588	0.0111212	3.37907	1.63392	0.883687	-1.09068	-0.468094	-1.37575	-0.472261	-1.50969	0.0803455	-0.72129	2.06431	0.13357	1.28725	-2.72318	-0.703853	-0.916993
ENSG00000068078	-1.31248	-0.210496	3.57338	0.183084	2.62571	0.982506	0.11243	1.21251	-1.44779	0.00973003	1.69585	0.283647	0.691271	2.11961	1.28459	2.06321	1.1879	0.526309	-0.208878	1.37388	4.31654	1.06268	-3.07324	1.08182	3.00007	1.74132	0.380437	1.19231	-1.46936	4.15382	1.8492	-1.3332	-0.859057
ENSG00000161960	-1.22269	-1.29683	-1.95739	-1.99409	-4.28835	-1.25109	-0.536348	-2.80481	-0.728974	1.97426	-1.91059	1.83239	1.13573	-5.12744	-0.639555	-2.17562	2.62373	3.99047	4.49202	-0.34192	-0.332427	-0.140317	1.2084	-1.34941	0.0189206	0.744336	-0.520936	1.46013	-0.496238	0.692969	1.59177	4.04171	1.2937
ENSG00000104059	0.722146	-0.0953996	2.17693	0.82794	0.342319	1.9135	0.662316	2.11474	-0.626591	1.05556	1.18235	0.0944145	-0.349709	1.99875	0.720813	0.833296	0.994643	1.6987	3.4742	-0.432864	0.401111	1.12907	0.215619	0.00138148	0.154244	0.434432	0.170605	7.52328	-2.95879	-2.53456	0.477673	0.039014	0.881932
ENSG00000075035	-2.57708	-1.49101	-0.73696	-0.200441	4.08175	2.41022	-3.65341	1.19903	-0.220259	-0.788555	1.3309	-0.775157	-0.438611	-2.00497	1.4225	0.462531	0.481481	-0.271346	-1.42325	-0.470487	-1.3591	1.27568	-0.401607	-1.62458	-0.872357	-1.00312	1.83535	2.31306	0.41912	0.671216	-1.48975	-4.33426	2.46416
ENSG00000166444	0.224287	0.517093	-2.88062	1.12196	1.27261	1.25925	-0.0921879	-1.40459	-0.110705	-0.00324063	2.09195	0.335256	1.46158	-0.342868	2.70525	-0.577777	-1.35597	-1.95326	1.10651	2.72675	-0.509116	-3.30973	-1.86829	-0.0668682	-0.348815	1.36267	1.03404	1.02941	-1.93526	0.0109867	-0.437562	0.495321	0.559777
ENSG00000184985	-0.61194	-1.23281	1.20658	-1.04602	-1.42972	3.30797	-0.348711	-1.90674	0.51376	-1.01116	0.807642	-1.13606	-2.28441	-3.7648	-0.468884	1.58331	1.63434	-2.51392	-2.91884	-1.12779	0.439554	0.140708	1.22322	-0.492376	1.28261	-0.878863	-1.9923	3.44993	1.24604	-2.28015	-0.39518	0.459561	-0.734621
ENSG00000132199	-0.865846	-3.03504	-1.51984	-2.08931	-0.594554	0.869994	-0.790406	-0.316652	-1.57114	0.185727	-1.01793	-6.64565	-0.677985	-1.01994	0.727283	-0.0727284	-1.03399	-1.91753	-0.0331327	0.550794	-1.94877	-0.50185	-0.121584	-1.66975	-1.40696	-1.4595	0.0685286	0.1616	0.0706534	0.023501	2.33756	-0.928946	-0.422423
ENSG00000213578	1.95079	2.10392	3.6002	1.16682	1.12637	-0.591745	-2.22453	-0.346206	3.65714	-2.15358	1.14484	0.765962	1.22407	-2.7407	0.208465	5.57723	0.104572	1.53055	-0.635031	4.06183	-0.30967	0.601802	1.43634	-0.573736	-0.245417	-0.395589	-0.710927	-1.10153	1.58709	1.74711	0.257954	0.653153	-2.83012
ENSG00000118898	-2.3508	-1.69871	-2.9797	-1.91363	-0.942458	-1.91835	-0.361354	-0.895064	-0.269609	0.80139	-0.0842075	-1.73402	-1.93743	1.64934	-0.738971	-2.85139	-2.75745	-1.54455	0.106391	-4.95746	-0.0591783	0.777864	-2.0401	-3.32611	-1.5442	-0.802945	-1.11403	-0.247229	-1.70827	-2.82871	-3.50879	2.7397	-5.76123
ENSG00000144481	1.16447	1.30922	1.85076	3.38142	-2.38013	0.419354	-2.14113	1.05382	0.929327	1.99778	0.33358	-0.759442	-0.166393	-0.0413834	-2.97523	0.328165	-0.949268	0.525013	0.607084	1.21057	2.89521	-0.627121	1.77754	0.227845	0.523227	0.013316	0.688576	0.0230719	-0.360283	1.29761	-0.261358	2.08126	-0.984068
ENSG00000011105	-2.39627	-0.584677	-0.0964607	2.60973	-6.37549	-0.479474	-0.489678	0.471574	0.935452	0.413239	0.148112	1.73129	1.01327	-0.514029	1.73511	-0.179416	-1.28828	0.901722	-0.776127	-4.27698	0.601786	1.36421	5.05222	-1.97847	-0.195216	-0.721333	2.5615	3.37396	3.40748	0.0725271	-2.79066	-2.78645	1.3844
ENSG00000123737	-3.37385	3.04783	0.175539	-1.52738	1.59999	-0.216537	-5.31348	-0.507511	-0.225318	0.770429	2.48421	-1.24708	-3.88568	-0.192587	-4.14457	-3.57753	-1.42945	-1.65019	0.238206	0.0471182	-2.45086	6.19202	-0.205474	-0.606976	-0.210723	0.230503	-3.75776	0.38073	0.257167	5.87188	0.572665	0.261765	3.26084
ENSG00000005469	-2.30695	0.436285	1.35607	0.15661	-3.16394	-1.32242	-2.80631	0.0429642	-1.53199	0.689822	-0.245649	-0.317551	0.814779	-0.176103	-0.617603	-0.783083	-0.363379	-2.76785	0.365632	-0.0252062	-0.839318	-0.399667	0.0692606	-0.34004	0.240227	0.525808	3.07394	0.79802	-1.03505	-2.34214	1.96784	1.06545	-2.47293
ENSG00000156928	-1.4018	1.1244	-0.76534	0.240032	-0.714715	1.09724	1.76816	1.53095	0.80313	-1.67365	2.04356	-0.660061	2.95145	0.900586	-0.509837	-1.85594	-1.98313	1.93601	2.16914	4.67958	1.54484	-0.469329	0.310342	2.5206	0.958764	2.575	0.850732	2.02012	0.303918	1.44011	-0.0555234	1.76824	2.24362
ENSG00000110628	5.48022	-1.74102	1.50348	0.573354	1.44882	2.16032	3.94514	2.04705	0.624813	0.876829	1.3713	0.352184	5.98442	0.231095	3.43621	0.951977	3.42576	1.27854	2.03405	-1.12721	3.86799	-1.4941	0.221776	2.68828	0.957939	0.360155	0.467452	2.11299	0.969451	0.994646	2.05482	5.74587	2.55582
ENSG00000196408	-0.934245	-0.252385	2.54095	-0.420927	-0.421239	-2.22413	2.11081	-0.644627	-0.0422873	-1.64779	-2.13123	1.17096	-2.12265	-2.32938	-3.38159	0.227802	-0.0888282	1.57911	0.155205	1.56182	1.67928	1.21248	-2.11354	-0.182532	0.386915	-0.435249	-2.64845	2.91208	-0.5867	-0.0331597	3.19132	0.563432	0.20508
ENSG00000163170	1.59857	-2.18616	0.88328	-3.14052	-3.84448	-0.396548	-4.43896	3.39975	-1.43477	0.0355024	0.768721	2.65254	0.0963905	-2.84369	-0.0369687	1.50006	0.246786	1.96526	0.700567	0.71982	0.442596	1.23793	-0.237793	3.53754	0.735152	3.84147	1.15483	-0.40627	-0.460546	0.789657	3.58749	1.80685	-0.307864
ENSG00000189350	1.38514	1.44914	-0.149204	-0.695307	-1.17546	-0.767649	2.6186	4.13978	-0.311725	1.45525	-5.91832	-1.5438	-4.47265	-0.0361232	-2.55179	-2.09021	1.57668	-2.29945	-0.161463	-3.3423	-0.593253	4.83011	-3.5087	-4.0587	0.113897	-0.958263	-0.121724	0.136151	3.04381	-1.51283	1.76467	-0.899223	1.01565
ENSG00000198832	0.958838	1.94344	-0.277875	-0.390704	0.745529	-1.32834	1.20032	1.08602	0.836259	0.276725	0.872397	-0.0650975	0.889732	-1.14204	-4.27549	0.596964	0.585462	-0.777486	1.12549	-2.24493	0.627402	0.848711	-0.170292	-0.0995721	-1.47876	0.669632	-3.73796	0.43211	-0.449964	1.23631	0.758138	0.624173	-0.367299
ENSG00000183751	3.95472	1.03779	7.28857	-0.658777	-3.26862	2.60571	-0.36611	-0.638142	-1.43047	2.03523	0.58534	-0.525732	1.4625	-3.59022	-1.78228	-0.0305146	2.15622	4.17452	-1.20574	1.79491	1.72681	-4.88252	-0.421693	2.06253	-0.0493536	-1.79576	-1.82975	3.19549	1.59626	0.0927656	-0.24319	3.61514	1.75584
ENSG00000163032	5.64154	1.86219	1.20314	-1.27933	-0.0771639	1.05575	2.02914	2.32031	0.627282	0.743537	1.56503	1.67958	0.961372	2.04905	2.68348	2.3325	1.30668	3.14598	1.40686	-3.07903	1.58134	-2.1114	2.07083	0.0646	-2.0598	2.5734	1.35138	3.37306	-0.151477	-2.77749	-0.751037	3.1953	1.5205
ENSG00000144647	-5.06666	2.08371	0.533446	0.656177	0.883644	0.258903	1.05161	0.602473	-1.0622	-0.629721	-1.42594	1.81756	0.73942	1.59647	1.53858	5.07729	0.451464	2.23306	4.6348	0.0990932	-1.00298	0.962076	-0.503697	0.0610749	0.873639	1.61173	-0.657924	3.77565	-1.4687	-1.25832	0.385071	-0.667335	0.74552
ENSG00000141504	-0.319261	-0.680171	-2.06214	0.291496	-0.445643	0.675192	1.38585	0.942925	1.85251	2.90268	0.239804	-0.605748	1.43454	-1.94855	0.148756	0.572802	-3.2109	-1.37714	1.52789	-0.0184829	1.56967	-0.410584	-2.50999	-0.0427526	-0.228797	2.35913	0.197459	3.55085	-0.0220451	0.0942767	-1.1645	-1.11499	0.0538359
ENSG00000100416	1.28105	2.90572	1.14563	2.70711	-4.79959	0.444236	-2.76122	4.24224	0.0039801	0.51163	-1.13712	1.95024	-0.387427	1.7911	2.73533	-1.1427	1.05741	-1.15402	0.0228334	-0.00743209	1.38441	-2.14817	0.261184	0.727851	0.264357	1.49282	2.08434	0.0434797	0.653917	-0.524498	-0.753084	2.07688	-3.06676
ENSG00000166823	-0.970176	-1.63961	-0.196642	-0.579868	0.0780295	-3.60397	0.719978	-0.359645	-0.255915	0.312147	-4.36863	-1.875	-0.873444	-0.67179	3.28476	-0.949958	-7.55867	-2.59963	-1.55767	-1.11746	2.86921	1.13071	-0.855908	-3.68656	-5.62982	-2.70265	-3.02718	1.08971	-0.852245	-5.89274	-0.93275	-0.510213	2.31543
ENSG00000152954	0.43715	-0.326784	-0.339875	0.120705	-2.27741	-2.13743	1.03779	-1.53981	-3.45063	-0.319374	-0.359773	0.367856	-0.223293	0.679827	-1.15142	0.610427	-2.17493	-2.3444	0.203081	2.15093	0.505514	0.707322	3.45044	-2.35044	0.899195	0.603693	1.18961	-0.709426	1.01848	-0.107164	1.64846	4.35106	-0.161178
ENSG00000104976	1.82988	1.08475	3.22317	0.639815	1.36321	4.18505	-5.43053	-5.55835	-1.72145	-4.82489	2.58987	-0.865834	-0.0475288	0.975222	0.171169	0.22475	1.03917	0.0356554	0.145882	-1.49188	-0.543183	-2.02614	0.282602	-0.431074	-4.11264	-2.68471	-0.907436	-0.216831	0.145004	-0.533437	-0.814928	-0.261957	-2.70121
ENSG00000196569	2.11367	-0.66646	-0.181018	1.77711	-0.896506	-2.0619	3.17406	-3.22884	-0.302681	-0.290924	1.04292	-3.11934	-1.24511	2.70581	-1.0367	-0.116137	3.26943	0.740469	0.655939	0.647594	1.64389	3.79292	0.686556	-1.31201	-2.54302	1.62291	0.0397797	-0.246825	-0.348591	1.60129	0.502162	0.393123	3.13618
ENSG00000149503	-1.56056	-0.580173	2.68464	-0.941831	-0.773992	-4.76349	-0.562231	-2.37579	-4.63251	1.90679	-0.0567252	-0.44304	-5.03542	-0.290391	-1.47342	2.06977	-1.58303	-0.108043	2.33025	1.51482	-1.12997	-3.47771	-0.791672	1.51073	-0.522311	-1.16717	-2.20334	-2.45498	2.85027	0.177661	-0.840934	-2.87478	-0.239618
ENSG00000124786	-0.229827	-0.46602	1.77447	0.0135824	0.484102	-4.66598	2.35115	0.688439	-0.250453	-0.423729	0.581337	-0.4001	-1.29382	1.40268	-0.0737254	-0.278891	-0.0286129	-0.86347	-0.306564	0.728718	3.0979	1.61682	1.27372	0.0487464	-0.263565	-0.277764	-0.533484	2.10045	1.27066	0.630399	-4.08611	-0.826122	-0.765894
ENSG00000148429	-2.44751	1.39084	0.00581005	-2.69453	-0.168127	-1.43941	-0.696371	-0.613728	-1.82093	1.86672	-0.287175	4.60167	1.15804	-0.225283	1.78159	0.174953	1.85197	-3.53214	3.07397	1.26108	1.51912	0.302901	-1.02441	2.11167	2.52541	5.12535	-0.677054	-0.761362	2.21971	1.23318	-0.400706	-0.121473	-0.539295
ENSG00000197496	0.319574	1.30499	-0.18341	0.456122	4.60141	-2.39747	0.896742	0.615517	-0.167761	-0.524635	0.328274	0.0250998	0.649731	-0.695007	-0.0444836	-0.180682	-0.0125656	1.21885	-0.271576	1.01058	4.6955	-0.495922	-1.84912	0.292866	0.70665	0.512126	0.646287	0.0197379	0.348887	-2.11709	-2.91664	0.647212	1.7832
ENSG00000130702	-0.455694	2.98355	2.21243	-1.16039	0.3172	0.401673	0.0781433	3.19504	-0.188812	1.73031	-1.11002	-0.125256	0.257804	-1.08559	1.12662	-0.403756	5.10043	-1.83683	2.71378	-1.53782	-1.00907	-3.03212	0.102541	0.476707	-2.97879	1.89271	-1.58516	1.31462	-2.5209	-0.936745	-1.22116	-0.90569	2.61907
ENSG00000174600	-1.20201	-0.898845	0.547628	2.39675	0.77707	-0.157832	0.0779002	-0.144697	0.86758	0.381288	-4.70722	-0.577897	-2.5033	0.403353	0.694661	-0.483252	0.599987	-0.626358	-0.720893	1.46844	2.13985	0.44132	-0.296714	-1.41959	-0.395921	0.0208424	-0.849623	0.478831	1.77507	3.68372	1.2821	0.198487	-0.997998
ENSG00000171724	0.0342164	4.99017	-1.78036	1.43018	-2.24642	0.979188	-2.97462	3.53145	0.652935	1.48586	-0.284747	-1.54664	0.0988564	0.664531	-4.01604	-0.627903	-0.766901	0.341237	4.93644	-1.43372	7.89807	-0.851434	-1.68644	0.488571	-0.126855	1.72209	-1.58362	2.46196	1.86441	0.2401	-0.134573	-2.27043	1.4624
ENSG00000088179	2.45054	-0.189574	2.14607	-3.25938	-0.631942	1.23736	-0.0895874	0.290896	0.199463	1.32002	0.270653	1.4193	1.27582	-3.84398	0.0954428	-2.79726	2.8766	0.290887	1.6724	-1.56372	-0.890328	0.222524	4.36857	-0.342468	-2.97858	-3.19292	1.61013	1.01917	3.83314	1.56422	-0.831592	-2.86504	-0.81617
ENSG00000106459	-0.900296	-0.199926	2.74009	2.26465	-0.813745	0.18861	-0.246477	0.429557	0.919234	4.11603	0.141615	0.50829	2.66435	2.88119	2.4921	1.17034	2.60658	-1.02679	-2.48483	0.371854	-0.131306	-2.75655	1.07173	1.57949	-0.450253	1.0059	-0.549631	2.75974	-0.337982	0.86802	0.740296	-0.00815543	-1.96012
ENSG00000174611	-0.19854	0.117724	0.777321	-0.556152	-1.07521	-0.702818	-1.51255	0.28886	0.735767	0.0161044	-1.38311	-2.99061	-0.0629804	-0.0408956	-0.671139	1.42572	0.411854	0.227714	0.040276	-1.42428	1.99336	-4.17223	0.521754	-2.44807	-1.12881	-0.0333045	1.67457	6.44892	0.461923	1.5482	-0.0246234	0.0895133	1.93286
ENSG00000174007	-0.317806	-0.534719	-0.633206	1.64592	-4.13638	-1.44282	-0.79325	-0.431196	-0.914258	-2.57133	-2.6805	0.189993	-0.543009	-0.893415	-1.93261	1.78776	-1.83591	-0.343332	0.642676	3.76011	-2.51527	0.108828	-1.62072	-2.21283	-0.685009	-0.478787	2.22301	0.108498	4.35263	1.60371	-0.013963	0.362522	-0.453321
ENSG00000169814	1.44911	-2.26175	-0.737346	-1.31679	-0.527628	0.0852194	1.49353	-3.9836	-1.71217	2.63868	-4.08087	-0.77318	-2.43187	-0.778094	2.11274	-1.48669	-0.393137	-1.27949	-0.279925	1.61118	0.215023	3.89918	-0.0581963	-0.698166	0.109174	-0.160527	2.18097	-2.76804	0.737998	-0.142575	0.202635	-3.28319	-2.35957
ENSG00000129071	-1.83319	3.57259	-1.69252	0.0220597	-1.51882	0.0524244	-0.100271	-5.07498	0.215291	4.71936	-0.0506213	-3.11036	1.25733	-2.16706	-1.00611	0.282578	-0.070023	2.13429	1.1079	0.995692	3.2224	-0.965095	0.56342	-0.769392	-1.02686	-0.153268	-1.29747	1.62409	-1.36456	-0.322947	5.22902	-2.39848	1.36049
ENSG00000174989	1.09097	1.15664	-1.65173	-0.463455	-0.629089	0.201382	2.41037	0.95446	-1.19708	2.15182	-1.43343	-0.521591	-0.992145	1.46948	3.44155	-0.45961	0.649197	-1.84537	-2.23621	-0.148357	-3.29861	-0.11365	2.22822	0.391231	1.84917	4.50036	-2.16111	0.861566	-1.20264	1.10101	-0.379417	4.56561	0.543228
ENSG00000178602	0.281905	0.129605	-1.00221	0.497744	-0.51614	0.656088	0.279076	0.0620165	-0.176225	-2.85361	-2.14386	0.709504	1.08796	0.713205	1.91142	0.253589	0.793489	1.4793	-1.00796	-2.28818	-1.40142	-1.65818	1.67257	1.0879	1.23165	1.60976	2.50421	2.16508	-4.13972	1.56438	0.0847054	-0.176087	-0.301543
ENSG00000089012	-2.54204	-1.33594	0.893752	-0.844093	-0.274821	-0.0240796	-0.908865	1.21953	1.25506	0.824967	-1.41245	-0.775442	1.17675	-0.734935	-1.66605	0.904394	-0.504556	-1.80666	-1.14893	-0.111372	-0.124507	-0.469595	1.76371	-0.529806	-1.14226	-1.32566	-0.652543	-2.85517	-3.21319	-0.940906	-3.85181	0.0910767	3.10141
ENSG00000174004	2.86175	-0.607551	0.289238	-2.58718	-0.246286	1.05015	-0.967634	-0.367262	0.334741	-0.0771734	0.283761	2.27919	-0.923074	0.965449	5.35014	0.758502	0.783772	-1.21573	1.14118	-1.60962	0.604715	3.3739	0.770305	-0.260975	0.602873	-0.339852	-1.70501	2.07985	1.01212	3.56853	0.12371	-0.713445	-2.58154
ENSG00000161981	-0.201413	0.832979	0.804084	1.93178	-0.191072	-1.27782	0.179213	-0.39933	-0.425605	-0.000713023	1.38999	0.0410639	0.934512	-0.448549	0.274444	3.10038	-0.309857	2.87675	-1.03998	3.83051	0.520097	0.0404222	0.861858	0.378035	-1.17953	4.40377	0.462488	-2.34007	-0.0962105	1.68294	0.0171622	0.148284	1.67105
ENSG00000143110	-0.179886	-0.127194	-1.66589	3.8719	-0.394499	0.290205	-0.360508	-1.55486	-0.36232	-3.58102	0.183332	1.99338	-0.694329	-0.480789	0.880762	0.713144	-0.701881	0.878405	-0.0938051	-1.15507	-1.63112	0.224093	-0.22637	7.05998	0.296285	-0.686177	0.586711	-4.18427	0.322702	0.459976	-1.54394	-2.80288	-0.537454
ENSG00000162998	-1.52078	0.580539	-1.95327	-1.60468	0.376839	0.791427	-0.843157	-1.62677	-3.77963	1.4902	-1.54612	-1.14015	1.56797	-3.32943	-2.0782	-1.43395	-0.354478	-1.50384	-0.307295	3.57609	-0.572866	-1.82442	-1.13233	-3.648	-1.62265	-0.166394	-0.660467	-2.38526	-0.729822	0.0210619	0.61167	2.84782	-0.347401
ENSG00000135845	-0.606154	-1.52261	-1.25593	-0.434483	1.76178	-3.92847	0.927997	0.499435	-1.41447	-3.42487	-0.975296	1.20683	-2.72235	-2.27127	-1.7248	-2.13808	-1.43063	-0.534641	0.929442	3.17733	2.8711	5.30879	2.41894	4.06855	0.265283	-0.596854	1.57681	0.0555628	1.03217	1.05418	2.50101	0.961942	-0.478189
ENSG00000127507	3.31313	-0.89394	-0.613605	-1.81998	0.215023	-2.58658	-0.823518	2.89462	-0.995553	-1.20012	-0.621751	0.386259	-1.37189	-0.811326	0.204821	1.72425	0.543223	0.162229	1.33913	1.75728	0.48166	0.765536	-2.46653	-0.525812	-0.273498	0.692034	-0.910329	2.39104	-1.19001	0.274571	-1.25929	-1.40524	-0.282732
ENSG00000177595	3.59308	2.00919	-0.341567	1.23917	0.405794	0.730626	2.17266	0.351026	0.306343	-0.0477522	2.46017	-0.226095	0.157758	1.41678	0.389417	0.609686	0.0125643	1.15026	-0.351468	0.660387	1.37872	1.25835	0.609912	0.310497	0.349161	0.591664	0.740569	-0.0166999	0.275153	0.291813	0.774379	-0.131002	0.396231
ENSG00000185522	2.20063	6.13383	-1.80942	-0.515386	-2.72309	0.304321	0.491445	-0.674255	-0.400634	-0.771244	2.03542	-1.9229	2.01841	1.37693	1.98321	0.207001	-0.923803	2.33617	0.0134727	-0.903399	-1.18864	0.213545	0.0925015	-3.27064	1.82578	1.71688	-1.2628	-1.17302	2.68822	-0.27348	0.611263	-0.492864	-1.72011
ENSG00000135250	-2.61759	0.920659	2.05347	-5.59774	-1.393	-0.488842	-0.849622	-0.109529	2.65214	5.40818	0.959163	5.05574	-0.0981868	-3.3132	2.3015	-2.24254	-0.000420132	4.25346	-0.00224577	1.10528	-1.39692	2.51272	0.328203	-0.962908	-0.402556	3.11309	-2.7535	-0.0731863	1.36817	0.632771	0.706283	-0.0714812	0.764752
ENSG00000161328	-2.175	-0.0776012	2.59292	0.090324	-1.01003	-1.81642	0.121103	1.35859	0.202816	0.0628053	0.11647	-0.0536232	0.222484	-0.330709	1.60216	0.0878547	-1.31204	4.54511	-0.448126	-0.311059	0.33416	0.0661611	-3.24148	0.455297	-2.72239	0.078309	0.425325	-1.12558	-3.47036	0.395848	-0.659768	-0.272417	-1.43107
ENSG00000162384	-0.749472	3.02609	0.779924	-0.499991	0.412578	-1.26531	4.21211	1.5823	0.529756	-1.41248	1.12954	2.79655	0.627129	-1.57582	1.00853	0.451794	1.91084	0.888236	0.06032	-0.442006	-1.57345	-0.152128	1.6054	1.56446	7.29442	4.04657	2.74792	1.90176	-0.188446	1.38858	-1.68056	-2.27329	1.10506
ENSG00000166262	-1.04842	1.23946	-3.2989	-2.945	0.417216	-0.825436	-1.03032	-2.37425	0.888945	-0.76047	-0.500808	0.478882	3.16542	-0.474343	2.95404	0.579491	3.61473	0.971816	2.20012	2.04772	3.1311	2.87024	-0.489804	0.982176	0.35891	-1.21511	1.7622	4.01535	3.75014	1.05502	-0.887993	-0.380913	-0.18502
ENSG00000168569	-3.31774	-1.76204	2.0718	1.19413	0.813453	4.06974	-0.459481	0.500088	0.270423	-0.442551	-1.21049	-1.72544	-1.52586	-1.39924	-1.19692	-0.801089	-2.14249	-0.594743	0.249771	0.246497	4.19439	2.62102	-1.37057	-1.00471	-0.921948	-0.812359	-1.21531	2.46542	-0.045052	-0.846841	0.890617	0.740534	0.192488
ENSG00000218336	-0.0162542	-1.41637	-0.010636	1.83904	-0.270369	0.753045	2.45964	1.34991	0.687631	-0.284344	-0.113164	2.6389	-0.0999498	-0.11884	1.24256	-2.65095	-2.67388	0.293888	2.28227	-0.891644	-2.42613	0.578636	-0.235306	-0.372716	0.427343	-0.357731	-0.296622	0.763213	3.05846	1.36476	-0.504141	-0.191989	-0.426916
ENSG00000134463	-0.897327	-4.12018	2.80344	1.27914	-1.39719	1.24871	-2.84898	-0.177801	-0.670357	1.05089	-4.98078	0.00636917	-5.68494	-0.481906	-1.64123	1.21568	-2.22151	0.90487	-0.081937	0.629303	-1.29939	-1.54509	-0.481164	-3.26539	-0.410215	-5.36292	0.0897692	-1.23614	2.5473	-3.95277	0.229486	1.23736	0.228001
ENSG00000186184	0.559927	-0.194953	-0.342299	-2.63713	0.152824	1.45863	-0.306278	0.132525	1.25932	0.120603	1.95497	2.14266	0.953823	2.2107	1.11874	0.122966	-2.95507	2.13027	0.369897	-1.0808	-0.344801	1.44231	0.0479951	-0.975685	-0.0166437	0.901118	-0.648435	2.66893	0.098601	2.12343	0.309321	0.849803	-1.54162
ENSG00000156958	-2.35809	-2.63173	-1.79697	-0.500908	0.346662	-2.00627	1.61107	0.165772	0.879134	1.29647	-0.3648	1.73725	-1.25743	4.27247	-0.489253	-3.07741	-0.158084	-0.687643	-0.848617	-4.5624	1.89307	-3.24706	1.79152	-0.762384	-0.731318	-0.883983	-2.60495	0.262837	4.47796	-0.221468	-3.78177	0.981976	1.39157
ENSG00000237765	1.91376	-0.181149	0.225852	-0.611786	-0.961344	-1.56191	-1.21026	-0.783791	1.84938	-1.2778	0.654993	-2.61324	0.688704	1.22263	2.10854	1.06483	5.25128	-1.43312	-0.295609	1.77597	-3.46486	1.07267	0.392228	2.94378	2.5584	1.91033	0.395549	0.0935392	0.458278	1.89348	-1.28071	-0.344205	0.342826
ENSG00000146376	-0.903604	2.23956	1.17691	0.0699901	-1.57775	-2.35843	1.91507	0.564065	2.32353	-1.92753	1.29406	-0.0866052	2.36577	-0.470179	-0.956653	0.369691	-0.601104	-4.69592	0.3494	-1.125	-1.73561	-0.225815	1.51558	-2.87968	0.412275	-1.04267	-1.49942	-2.69576	0.105778	-5.32689	0.126277	-0.946969	4.58807
ENSG00000179409	2.4326	-2.15788	2.94445	-1.37764	-1.98082	0.574889	-0.71585	-4.44983	-1.84244	-0.682407	-0.784252	0.502158	1.73619	0.0492416	-0.202159	1.9317	-1.28233	-0.8155	2.62652	-4.94526	0.0208293	0.18818	-0.233897	1.14971	-0.224037	-0.27339	-0.942085	-2.41669	-0.54137	1.11385	-0.526245	-0.938648	-0.169023
ENSG00000125037	-0.751302	-2.16111	-0.415493	-0.720119	-1.37647	-2.0299	-1.47357	-1.98501	-0.302013	0.83064	2.32593	1.08833	1.91606	-4.04798	0.223195	-0.385962	-3.70643	0.453766	-1.08848	1.32219	0.000661914	1.05987	0.336475	1.25629	-0.0662812	1.28324	1.99127	1.13654	-0.4638	0.443873	0.507635	-0.303615	1.77819
ENSG00000120549	-1.99993	1.58985	-1.12953	-0.161165	3.4173	-0.895296	-2.5193	3.11331	1.49676	2.23242	-3.2573	-0.646244	-0.170165	-2.78554	0.529113	-2.57297	4.87542	2.41442	-1.05385	-2.22354	0.0334364	0.152277	0.190761	-0.821397	-1.55462	-2.1009	0.546904	5.40257	2.74175	1.34774	1.17927	3.24359	1.98224
ENSG00000133789	-3.20609	-4.77268	3.26365	0.0586275	-1.50968	-1.05473	-2.75473	0.0289022	0.757252	1.29514	-2.26778	1.59934	0.528958	0.0470693	-0.446921	0.232152	-0.397351	-1.88835	0.138146	0.147776	-0.673172	0.554632	1.15663	-0.658381	-0.058749	-0.905208	-1.48931	0.978552	-1.28167	0.880569	0.190038	0.346745	2.8577
ENSG00000170540	0.944453	2.92302	-1.99523	-2.4927	3.63835	-0.0704736	-0.512027	-0.0458783	0.355917	-0.338157	6.74658	3.63652	0.750962	-0.538611	0.945156	0.420018	0.246125	-4.73054	-0.208989	0.656142	-2.41342	-0.490814	-0.304209	-0.147096	0.0303698	0.40696	0.949455	0.440554	1.49024	0.0411625	-0.139303	-0.954866	4.88639
ENSG00000128512	-0.490949	-4.60942	0.0652449	0.900981	-0.654383	-0.354439	3.23247	2.84254	-1.08488	-0.629475	0.891865	1.00359	-0.348882	-0.310995	-4.30318	-0.185562	1.00375	-0.198193	2.27891	-0.451082	3.19165	0.460114	1.11487	1.56453	1.55206	0.594581	1.26596	2.61023	-0.452789	2.68245	0.203752	-1.20996	-1.56332
ENSG00000107521	0.390783	-0.397892	-0.440143	-0.126804	1.06431	-0.789743	1.60036	-0.361811	-0.684974	-1.2238	0.755062	0.958384	4.01136	0.0872742	1.29018	-0.0973901	-0.660524	0.691799	0.435102	1.01731	2.00122	-4.82631	0.223002	5.76331	0.823934	0.0984283	0.0828018	0.201679	-0.0961557	0.0643809	-0.444293	-1.02837	-0.608716
ENSG00000177082	-3.09969	-3.17609	-0.689832	-0.102302	0.830196	-0.544976	-1.20558	0.507534	1.59697	-1.36231	1.47128	-2.37533	-0.0370832	-0.238822	0.0518493	0.511915	0.110146	-0.161227	-2.07851	-0.622969	1.53647	3.75952	0.268055	-6.07146	0.75881	0.427421	-2.65121	1.07388	-0.16712	-0.288254	-0.0592991	-0.14038	-0.765665
ENSG00000159228	-4.67142	3.76541	1.59335	0.304258	-0.470902	0.447021	2.58763	3.72067	0.460662	2.27606	1.20059	-0.756677	0.494388	-1.35038	0.656214	-0.540012	1.75446	1.77868	0.950415	-2.53095	-5.87911	-0.152065	-1.21024	-0.651012	1.61926	-0.932613	0.455392	1.37701	0.963209	3.19288	-3.93922	2.05425	2.33368
ENSG00000099904	2.30387	1.40561	-0.156421	1.02488	0.193286	0.611171	0.705229	0.0287499	1.54527	0.320278	1.25282	1.27443	1.59127	-0.0475976	1.66629	1.00472	-0.36865	2.22775	-0.787604	-0.425728	2.08412	0.495322	0.516863	5.51806	1.68113	3.22463	0.212373	0.0173814	0.883174	0.69102	1.94748	0.758623	1.62744
ENSG00000116990	-0.935602	1.9558	0.150219	1.7791	0.785518	-1.47909	-0.581553	-0.270653	-1.20169	1.36821	0.413193	-0.231707	0.15374	0.117092	1.84806	0.596581	-0.533012	-0.923894	0.110131	0.425924	-0.165876	-0.160688	0.318442	-2.68632	-0.486126	-1.34636	1.41991	1.17964	-0.721358	-0.809261	-0.427293	-1.43783	-0.13752
ENSG00000134775	4.09272	-0.399704	3.89827	0.703008	1.73696	0.152805	1.67448	2.25459	-1.43151	-0.344651	0.344965	3.13122	-1.24745	2.15154	-0.132596	0.822963	-0.746353	0.49675	1.06651	-0.0991372	-0.0469643	-2.52778	-0.34462	-1.06409	-2.10667	-0.998925	-0.112811	0.863435	-3.92323	2.47918	4.47061	-0.0930593	-0.797064
ENSG00000105784	1.36774	3.13742	0.944236	3.30131	-0.181325	-0.0123813	0.845671	0.307963	0.921827	1.06449	-1.68941	2.81729	-0.82139	-1.34904	0.84229	-0.0407082	-1.87971	1.78502	0.718757	-0.165047	1.22936	1.27596	-0.43805	0.318849	1.65379	-0.0991575	2.61295	4.00748	0.222875	0.361373	-1.07005	-0.268449	-0.397011
ENSG00000185917	-0.790369	-2.57516	1.01217	-0.77975	-3.12703	-2.26313	-2.71808	-0.0610435	2.3046	0.0949619	-0.364382	0.299299	-2.91487	1.49079	-0.281497	2.15333	-4.02294	-0.0361716	-0.660711	1.60192	0.234425	-1.09376	0.306962	-2.57448	-0.824491	1.25112	0.76617	-0.601417	-1.00365	-1.21253	-0.744239	-1.01067	1.22261
ENSG00000123552	0.113056	4.1591	1.4253	-1.04982	-1.29934	0.433285	-0.887236	1.55062	1.7721	-0.308168	-3.55679	2.58611	5.84419	-1.3826	-5.06412	0.456806	0.239125	0.410444	-2.48477	0.0307154	-0.897502	-0.378742	-0.692911	0.0212842	0.412267	0.533121	-0.19772	1.20705	-1.18289	-1.11213	0.686737	-0.399204	0.284329
ENSG00000120333	-5.67952	-0.937947	-2.34799	0.040393	-2.5786	0.547117	-1.22514	1.93711	-2.41017	0.0504819	-0.0659533	1.38283	-1.27158	-2.19176	-2.48505	-2.23087	3.51684	-0.826375	-0.839023	-0.496487	-2.65438	-0.0266804	0.279169	0.504622	0.666912	-1.68388	1.4404	2.5004	-1.22632	0.639296	1.61328	0.167038	-0.842223
ENSG00000164258	-5.16455	1.30108	-1.56441	-4.91357	-1.04802	-1.19294	3.53171	-0.923257	-2.35588	2.76448	1.36544	0.707919	2.89997	-3.59953	-1.58888	-2.40032	0.558777	0.909359	-0.862636	-0.278273	-0.28557	-0.783158	0.27609	0.0401485	-0.28751	-0.489384	-0.293882	0.378509	-0.961724	2.77009	5.03752	0.553671	0.814307
ENSG00000105613	-1.38804	-0.929949	0.843104	0.796439	-0.176683	0.539519	0.698358	0.831941	-0.30893	-2.145	2.06803	1.43048	-1.44893	2.01541	0.273835	-1.74449	0.659478	0.0254419	0.604795	-0.668824	-3.31068	0.314375	0.319129	-0.763523	-1.35773	-1.23907	-0.480429	1.98794	-0.125414	0.99638	0.385913	3.29272	-5.40999
ENSG00000159899	-2.14363	1.56874	0.293809	4.10357	0.527432	-0.711247	3.17378	0.511875	2.48758	1.8205	-2.79732	-3.62111	-1.04131	1.37849	-0.819469	-0.298448	-2.95999	-1.0554	1.22702	0.628751	1.72853	-2.4933	3.762	-0.0645328	-3.52635	-0.324857	-2.66195	1.2114	-1.52418	1.2793	2.02412	1.93532	1.49255
ENSG00000180694	1.8109	-0.844653	-1.0095	0.184915	-3.50265	-0.153715	2.94565	1.38144	-1.78328	-1.04902	-0.18939	-0.583314	-1.42498	-3.00438	0.371304	1.26684	2.16687	-1.29623	-1.59199	0.206289	2.07021	2.48703	-2.5218	-1.14215	-1.77521	-0.950794	0.126845	0.810457	-2.43215	-0.284496	3.0178	-0.516965	0.800871
ENSG00000116670	1.63589	1.3744	-2.52075	0.660273	1.38256	0.688269	-2.30451	0.431174	-0.215555	-1.44907	2.06575	-4.94969	2.30694	-2.19942	-0.059823	1.46437	-1.01607	2.12253	-3.60057	-0.107798	0.159669	-0.502166	-4.43647	-0.252415	-0.917989	3.27315	1.97586	1.71274	-1.74282	2.14664	-0.207277	0.509448	0.136246
ENSG00000041353	2.03197	1.0617	0.215916	4.54481	-2.62051	0.598647	-1.14801	6.25879	0.632248	0.516852	1.66243	-0.112805	1.50248	3.52503	-0.760126	-5.7514	1.4925	1.36751	0.0486183	-0.567958	1.27304	1.29548	0.571376	0.801114	4.54846	0.973162	-1.22261	0.914582	0.914009	0.875907	1.9968	1.67619	2.13916
ENSG00000253250	0.212792	-1.28624	0.963452	-0.370047	0.845966	0.778035	4.67384	1.33823	1.35964	-1.63112	-1.06656	-0.473045	-1.30614	0.735517	3.10539	-2.17958	1.16864	-0.355383	0.648097	2.08624	-1.16747	3.68402	0.174624	0.19436	0.228065	0.488623	0.0974042	1.3444	0.102347	-0.386887	-1.23362	-1.31793	-7.07471
ENSG00000171223	1.64797	0.241555	1.09671	-1.56466	-0.768912	-0.177818	-1.13846	-0.293121	-0.92831	-0.955978	2.5309	3.19698	1.56511	1.10908	3.39521	1.38651	0.280473	0.498383	-1.44045	1.8393	2.73587	0.953679	0.254517	-0.137051	-0.7848	-3.35813	0.469747	0.748475	0.353644	5.64204	-1.02347	0.371013	-2.28904
ENSG00000095066	0.0111693	2.30155	0.391122	-0.344608	0.0424946	1.10361	-0.44067	-0.731291	0.398326	2.72966	1.39368	1.09426	1.26443	0.92619	2.17709	-1.18208	0.188394	1.7459	1.21584	-1.26311	-3.11433	1.35832	0.0588155	2.30558	5.99224	3.86386	-0.570703	1.18521	-2.32411	0.880352	1.83901	-2.31576	-1.08432
ENSG00000132182	-1.82946	-1.72618	4.16926	-2.43193	-0.935527	-0.382016	-0.276407	0.136529	-1.30021	0.255405	-1.26416	0.965897	0.109277	-0.272938	0.207973	-0.491051	-0.601222	-1.70563	0.160499	3.15781	-1.5275	0.13047	0.718361	-1.96694	1.46405	0.770063	2.269	0.698386	-2.14228	0.588696	-0.244971	-0.21142	-0.0750031
ENSG00000142606	-0.575845	-0.807292	0.481507	-0.936611	1.21367	0.973088	1.08532	0.8174	-3.45716	0.474941	-3.31686	-0.137738	-0.944792	-0.74861	1.53871	0.863924	0.638534	-0.755426	-3.43462	0.167279	1.17451	4.42273	-1.11543	0.298918	-0.578316	-0.764908	-1.91094	4.93084	-1.04129	2.91546	0.119711	0.974237	0.199232
ENSG00000128881	-3.75106	-0.416707	-1.73839	-0.157151	0.0277025	-2.06565	-1.09986	-1.07651	-2.46337	-5.58714	1.02082	0.982687	-2.93193	-4.40814	-0.347469	-3.62366	0.409934	0.252792	-0.394967	2.72836	0.834155	1.11099	-3.4254	-6.3759	-0.640255	0.789419	-0.270838	-0.216635	4.53395	2.74517	-2.67539	0.0958475	-3.49117
ENSG00000188042	-1.36299	-0.803269	-3.72417	-1.1925	-0.250332	-0.860254	0.426603	0.504405	0.409275	-1.20336	0.429434	0.767828	-3.21431	-1.63286	-0.66947	-1.6064	-0.378567	0.822491	-0.407331	-2.99162	1.77739	-0.736472	-0.374339	-3.5136	-0.796805	1.10358	-0.879653	5.36104	-4.25396	3.34559	0.581428	1.28156	-4.2426
ENSG00000135916	-0.939738	-4.01496	-2.16361	0.473447	-3.6357	-4.35204	0.885266	0.184497	-1.12247	0.311782	-0.176018	0.874694	-1.2802	-1.13854	-1.13212	-0.571926	3.32856	-0.618162	-1.73021	0.0726978	0.124553	1.42493	0.753321	-1.67455	-0.362698	0.419741	-0.887398	1.64853	-0.942883	-4.23579	-3.92244	-0.399924	-1.9144
ENSG00000154065	-0.304978	-2.69861	2.1231	-0.941508	-2.33875	1.03176	4.01573	-1.70918	-3.38356	3.6482	-2.9382	1.2164	1.63777	0.875151	-0.822103	-1.54432	-1.81363	-1.95233	-3.85235	-0.712989	-0.155963	1.2207	-0.927573	0.136193	-0.760453	1.2448	3.47067	0.556599	-0.156199	0.741264	0.426437	0.408734	-0.348953
ENSG00000100285	-2.62897	-0.955019	-2.91381	2.52201	-1.15117	0.404036	4.92438	-0.531057	-0.439754	-0.78815	1.03705	2.68687	0.653738	-1.26604	1.88966	-0.991774	-1.88856	-0.448047	-2.56535	1.06747	2.37094	-0.317717	-6.01875	-0.483066	-0.626225	-0.0718713	0.482139	1.95682	-3.7839	1.58229	5.73896	2.16083	-1.48556
ENSG00000234409	2.29525	-0.519542	-0.0666993	0.524812	-0.278362	0.850824	-0.0367891	0.174784	-0.163629	0.539619	-0.488874	-0.575144	-0.794789	0.44572	-0.344452	-1.04998	-0.694072	-0.0125532	1.69998	0.214625	2.8321	0.445091	0.99231	-0.128533	-0.223692	-1.96779	-0.310846	-0.152328	-0.247415	0.109257	0.172616	0.158981	-0.825611
ENSG00000132026	6.60928	3.86348	1.28382	4.98732	0.951712	-0.291806	0.680312	0.928482	0.701801	-0.505557	0.826131	1.60515	-1.37063	0.524605	0.393537	-0.535832	0.403779	0.0351319	-1.53673	-0.662734	2.3456	0.490203	0.0913458	0.046376	-0.605845	-1.0765	1.99566	1.97193	0.919468	-1.41236	0.229091	-0.419033	0.465936
ENSG00000040608	-0.511861	-0.106207	0.492464	2.17836	-0.367675	-0.720709	1.21519	2.51136	-0.8803	-4.05907	1.84377	1.50403	-0.502298	1.35458	3.90814	2.93019	-2.55855	-0.556576	0.381704	-0.682253	-0.155067	0.500816	1.20133	-1.44163	-0.711618	-1.03146	0.173763	4.13867	-2.97962	-1.19555	-1.78085	0.0312978	-0.0536794
ENSG00000162929	-0.390785	-1.94509	-2.21126	-1.82467	-2.23041	-1.33561	-0.101077	2.6273	-2.49404	0.55642	0.832904	-3.08427	-1.35749	0.524135	-0.105058	-0.581816	1.17068	-0.673306	3.92881	3.27284	3.56901	-0.0261164	-4.99697	0.516358	0.0730398	0.836028	-3.174	4.25298	-0.423444	-0.535828	-0.00866301	-2.31059	-0.957634
ENSG00000185133	3.76172	0.52096	-1.01634	1.21482	-0.136862	-0.641916	3.93893	-2.0702	-0.596992	-1.17999	0.133011	-0.50391	1.18555	0.759938	1.74293	1.93002	1.10868	-1.09239	0.548561	-0.932771	-1.19748	1.43642	1.15777	0.741194	0.598304	-0.181137	0.0594797	2.64318	-0.243097	-0.939796	-0.141992	0.307493	-1.85699
ENSG00000153233	-0.450941	0.682536	3.79408	3.12687	0.821909	0.953568	-0.462911	0.791562	-0.253069	-1.18924	0.307492	-0.41354	1.76868	2.03124	0.187683	-0.277127	2.10504	0.78989	-0.275901	-0.0638789	-1.16573	-0.179017	0.412721	-0.26537	2.05991	0.728158	0.427181	1.89351	-1.83924	-0.243056	0.125908	0.402759	3.38048
ENSG00000122025	-0.73838	0.399933	0.089754	-1.05076	-1.69352	1.90034	-1.66374	-2.69704	1.13037	-0.255136	0.893742	0.714454	-3.00683	2.21279	0.446061	4.46882	0.564898	-1.22276	-1.4006	0.208479	-1.80129	-1.11791	0.536425	2.78499	1.88482	0.140987	-0.0559338	2.09489	0.786848	6.15309	-0.0478506	0.57483	-2.18297
ENSG00000177600	-2.18977	-0.0866717	-0.772253	-0.830763	-1.41337	3.21163	3.39442	0.0829339	-0.93958	2.1169	-1.10803	-1.58373	0.412087	-2.42259	-0.477007	0.420137	-0.258127	-0.503168	-0.426842	0.378519	-1.00439	1.1161	-0.844984	-0.621549	-0.484397	0.420032	-0.9803	1.18488	2.51457	4.54788	0.558899	0.802128	0.434952
ENSG00000174939	0.546337	1.51182	1.18017	-0.158011	3.29432	2.40756	1.1792	1.55295	-0.0895297	-1.21649	0.090641	0.0921155	0.925647	2.39731	1.72103	2.17338	0.533055	0.932356	-0.331723	0.124699	0.547666	0.0302059	0.993625	-0.00294727	0.0930909	2.1778	1.18777	2.27137	1.62186	0.129658	0.141537	0.363888	-1.32012
ENSG00000214941	1.70663	-0.61105	3.06087	1.11421	-0.0419241	-0.404057	0.150079	-2.88476	0.563185	0.494931	-0.311729	-0.37446	0.261279	-0.611427	-1.51775	1.8457	-0.0559694	0.532618	1.26233	0.0958395	0.413956	0.897054	-0.28049	-0.578091	-0.211426	-0.0907532	0.149401	-4.98879	0.0413904	0.841432	3.8784	1.50226	0.285945
ENSG00000139880	0.277266	-1.76065	-3.91548	-0.0922272	1.67298	-0.257294	2.67359	-0.929948	-1.95239	-0.626328	1.86318	2.13348	-0.0341057	-1.50215	-2.96919	0.530982	-1.62369	1.32512	-0.0517317	4.89415	-2.47196	-0.172505	0.710709	-3.46638	1.94851	3.27468	0.113962	4.05705	-6.19555	-6.1207	-0.64483	-2.76038	1.30349
ENSG00000149633	-1.34227	-3.16406	-1.06702	-1.34648	1.74389	-1.63865	-0.780531	1.01828	0.940377	1.41981	-0.0626788	-2.67289	2.75648	-1.40581	-2.4057	-4.15535	0.32867	-2.24505	1.45247	0.85882	1.07543	0.123323	0.880053	-1.46965	-2.14953	-5.16851	-1.5323	-2.53863	0.741182	2.35097	0.601722	0.482288	-1.87114
ENSG00000167858	-0.193258	-0.520223	6.51867	0.165715	2.23309	-0.569768	0.541552	-2.3892	0.630109	-1.38482	-0.91855	0.974034	-0.241947	-1.74156	0.368397	-2.44419	0.851889	1.46639	5.65477	0.242528	-1.38277	-1.97037	-0.139502	-1.9367	-0.491254	-5.85351	-0.114703	0.536592	0.248263	-0.166117	-0.387952	-1.25596	-0.692921
ENSG00000101004	-0.881965	-1.62797	-0.370083	-0.184535	-1.97076	0.581615	0.42663	-3.7735	-1.67489	-0.0274574	2.94372	1.25296	-0.834791	1.1228	-0.136821	-1.18146	-1.2603	0.784013	1.01781	-0.528214	-3.34992	0.938645	1.92771	-0.948859	-0.991723	2.14417	1.37139	-1.69128	0.558599	-0.447153	0.594868	-1.85916	-2.18904
ENSG00000102967	2.62746	-1.17521	-0.400653	1.24664	1.11751	0.471013	-3.62757	1.25678	1.77428	-1.00085	3.30569	-4.10102	1.26825	0.789304	0.194303	-2.14679	-0.164692	0.432936	-3.11216	0.79283	-2.49121	-2.12483	-5.6417	0.0234618	0.0240529	0.555035	5.04397	0.596467	0.620695	-1.37961	-0.0396872	0.120112	0.264394
ENSG00000143256	-3.53882	0.300428	0.532126	-2.46575	2.3456	1.24147	0.720527	1.17382	4.63003	2.86505	2.52838	0.809463	1.03939	-1.10596	-2.93962	0.238938	1.43312	0.278712	0.553425	0.22056	1.12526	0.170769	-0.391675	-0.427602	-0.0713347	-0.501176	-1.47975	2.14578	-1.28646	1.10022	1.14097	-0.376425	1.28288
ENSG00000168884	-2.4888	-1.47236	-2.06025	1.90625	1.68085	-0.476946	1.08566	1.51923	3.84262	-1.58322	0.222196	-0.934037	-1.50812	3.56013	-0.11464	0.0232805	-0.486291	-1.35108	-0.129436	0.656067	4.69767	0.936475	0.590417	-2.74009	-1.63353	-0.62682	-1.62237	-0.135931	0.597157	-0.24588	-0.0829381	-0.176178	0.901904
ENSG00000047457	1.84221	-1.73391	0.136296	-1.53157	-0.231215	0.596139	-0.990768	-2.71126	2.91609	0.243081	4.44675	-1.10196	-0.288649	1.26638	0.0787563	-1.12156	0.692077	-1.55388	0.0478166	-2.33415	1.40377	1.67153	-0.300459	-0.770925	0.127804	-2.10463	-0.218814	-0.0855146	-1.59357	-0.522101	-0.346603	-1.10245	0.352943
ENSG00000186479	1.44178	1.57408	0.420844	0.457281	2.74989	3.36939	-0.375125	1.92398	0.334446	-0.562931	1.25984	-0.0307263	0.457675	1.24535	-1.87931	3.36705	0.280124	0.916546	-1.07235	-0.102865	0.477657	0.629847	-1.26458	-0.549951	-2.6425	-0.886569	-1.30171	2.39384	1.16198	1.49133	-0.152226	1.19288	1.3556
ENSG00000002016	-4.44871	-1.07457	-0.969189	-0.523663	-0.43975	2.41893	-2.17355	3.91424	-0.245032	-0.679034	-0.724158	-3.01754	0.252305	-4.82096	0.132765	0.280601	0.757609	-0.349138	0.942181	-1.5279	0.750722	1.6425	-0.207116	-1.72578	-0.693701	-0.649959	-0.361985	-3.44491	-0.151554	2.18405	-0.0131492	1.67099	-1.39868
ENSG00000158793	-0.927392	1.30805	-2.28368	0.431703	1.33794	1.95432	0.585132	1.31179	0.322857	0.511747	-0.189035	0.858658	2.32352	0.153869	-1.06372	-1.73757	-0.787301	-2.68453	-0.24421	-0.159447	-0.166958	-1.29465	0.796847	-0.681286	-0.333788	-0.230965	-1.99138	1.3015	-4.40544	1.31035	-0.0551947	0.108223	1.05543
ENSG00000108474	-3.03389	4.11511	2.78608	-0.0485931	2.31027	-1.54805	1.34736	0.165272	-2.8142	-0.398736	0.342379	1.70338	4.65426	0.418798	-3.98311	-1.07852	-0.908105	2.37363	0.884295	-1.13148	-5.88847	-1.29812	2.91869	5.50958	-2.57253	3.19858	-1.81499	0.770203	-0.002126	2.18938	-1.47745	0.206941	0.159737
ENSG00000156076	0.36841	1.793	-4.52325	-0.459442	-1.95863	3.11998	3.67089	1.13494	-0.851303	-0.751864	0.230766	1.29031	2.72067	0.845203	0.378596	4.60296	1.43606	-0.117498	0.0722979	-1.25167	1.29768	-0.10216	1.42042	0.158468	0.544949	4.90172	0.0399797	-2.52938	0.759754	1.62665	-0.463504	0.0391365	0.657575
ENSG00000134152	-0.90826	2.8124	-1.47562	-0.701645	-0.0388256	-1.68215	1.19722	0.294831	0.261331	-1.13139	2.44914	-0.585257	-1.24084	0.0866761	2.23345	-1.04555	-0.893764	-1.63032	-1.18075	-1.04681	0.530473	-0.601003	0.0801084	0.361853	-0.130054	-0.17031	-1.02282	1.65896	-1.47686	-0.459816	-1.12221	-5.94918	1.37443
ENSG00000166510	0.557295	0.577538	0.305297	1.70362	1.7189	-0.472746	-3.89416	-0.613881	1.47587	-0.990894	-0.0351804	0.452525	0.105692	-1.16258	-0.0884278	2.0279	-0.910021	0.10929	0.00904528	-0.872737	-1.02364	-0.81061	0.723819	1.96804	1.35864	0.609578	0.428795	-1.34303	-0.780822	0.384152	0.253202	0.662707	2.20796
ENSG00000120332	-4.37999	-2.79434	-0.344247	-0.508496	-1.78736	2.94379	0.160164	-2.23358	-3.91765	-0.139508	-4.95276	1.87421	-1.11722	-3.35011	1.22728	-3.27518	-0.477936	-4.33927	-1.11939	-2.33793	0.204871	-0.703727	1.97988	0.758469	-0.562444	0.668952	-0.349853	0.219125	-1.64871	-4.6983	-0.375845	1.28348	4.11599
ENSG00000144504	-0.337238	0.150009	-1.4175	-0.0917728	0.527561	-2.05272	0.388115	1.61478	0.406561	-1.50528	1.51567	-0.00346386	-0.475039	1.33154	0.70778	0.270341	1.09627	0.949465	2.10564	-0.323811	-0.473895	2.45814	-1.12604	0.912347	0.255716	0.688829	5.14662	0.0925906	-0.559235	-0.169232	0.246939	0.0226948	-0.895756
ENSG00000169064	1.89408	0.53371	1.50343	1.67626	0.32949	0.357143	-0.856256	0.612561	0.829104	0.253647	3.89622	1.03254	1.9176	-0.191168	0.865158	4.51706	-0.0254374	3.84232	0.164956	-3.41595	-1.01414	-1.26556	-1.22403	-1.63737	0.366024	2.44943	1.62729	0.981893	1.4505	1.67026	1.86765	-2.06168	0.390864
ENSG00000107295	-0.516024	0.78252	0.887376	-1.67629	0.172167	4.7527	3.2789	5.29241	-0.593408	0.023356	3.25815	1.99008	0.532368	3.76217	0.909374	-2.47115	1.27483	2.6454	0.431778	-0.300962	-0.87835	0.70525	0.0212438	-0.962484	-0.341325	-0.364938	1.70406	3.05714	-0.33446	-2.2646	0.717359	0.62406	1.07922
ENSG00000133119	2.32094	1.35469	0.0966132	-0.902149	0.255157	3.47672	0.315429	-0.552646	1.52949	-0.80152	0.997264	-0.966551	-0.803792	-0.0170469	0.974934	-0.67378	0.707834	-2.18101	-2.35488	3.35501	-1.24666	0.447304	1.83472	-2.17704	-0.965409	2.20772	-1.2884	1.35956	-3.30719	-0.156496	0.685319	0.388979	-0.686354
ENSG00000163918	0.978932	0.0295054	0.33554	-0.854342	-0.543796	-0.835051	-0.397427	-0.0152413	4.34112	2.0892	1.42289	-2.72066	-0.682788	0.554822	0.109821	0.36665	-0.686382	-1.10912	2.68611	-0.692856	-1.95755	1.6891	-3.41546	1.0256	0.426802	0.679851	0.179005	-0.321505	0.838686	-0.728116	-1.24281	-0.766201	-3.15679
ENSG00000104213	-1.93181	2.40453	-3.75374	-0.583602	0.187746	-5.28229	4.78739	-2.50333	4.70885	0.240389	-0.713711	-0.718351	-1.1699	5.12452	1.16536	-1.48994	-2.04797	3.94901	-3.17201	-1.30761	-3.35292	3.69319	2.13535	-4.25438	-3.5041	-3.35783	-1.63431	0.24372	-1.08572	-1.21452	-0.504891	1.07194	-0.250613
ENSG00000015475	0.910725	0.704766	0.116265	0.638574	-0.782186	-0.348869	0.226359	1.2162	-0.01105	1.69062	3.43548	2.66101	0.933802	-0.21201	3.78593	1.14302	-0.20346	1.3327	-0.0988347	1.9487	-1.01762	-0.138402	0.041837	1.13869	0.871397	1.59412	2.73297	0.659406	-0.550425	0.425714	0.174337	1.68591	-0.341697
ENSG00000172137	-1.02771	-1.06032	-0.303029	-1.0692	1.69375	-0.464918	-0.00287365	-1.47342	0.314221	-1.2928	-1.79365	0.695505	-2.31541	-0.110089	0.0924694	2.26322	0.953849	-1.11274	1.31563	0.288227	-0.157732	0.0610264	-1.26727	-0.243161	-0.112467	0.538858	-0.806638	0.781802	-3.66301	-1.87737	1.13664	1.15879	-0.941813
ENSG00000140830	-0.55602	0.155376	-1.60088	-0.378672	3.90346	2.14502	0.973166	-0.829905	1.19804	-0.235421	0.596029	-4.91069	-0.386664	3.18888	-1.93949	-0.538768	-0.0149013	-3.13958	0.278159	-5.00113	-0.971198	-0.696797	0.370848	-0.418191	-0.686	-0.447926	-0.355126	-0.250035	-0.853235	0.471277	4.61057	-2.44683	-0.0460649
ENSG00000075240	-1.3888	0.454988	3.00254	0.546581	0.764109	-0.655365	-3.59272	1.85772	-2.4488	-1.35612	-0.372949	-0.192067	-0.0674507	1.48886	0.990277	0.579977	0.746789	-1.22705	0.375568	1.6875	1.36536	2.77123	0.820915	-0.0332831	-0.125819	0.66979	0.194656	0.760452	0.120833	0.438567	-2.34514	-1.58783	-0.0869026
ENSG00000167969	-0.665415	-0.858193	-0.028626	0.553104	1.69042	0.168381	-0.484881	0.372278	3.29816	1.16978	-0.273175	-1.59421	-0.0437198	0.245936	-0.644669	0.0758694	-0.481346	-0.331218	0.892788	-1.03671	0.243861	-0.978149	0.684799	-0.513546	-0.372466	-0.0901878	0.935824	-0.224507	-1.19978	-0.999588	0.656677	0.842783	1.96607
ENSG00000123612	-4.34713	-0.117373	-2.76421	-4.3675	-2.97891	2.42295	1.13947	-1.75198	-0.950572	-0.235615	-1.46329	0.729233	-0.0707778	-0.560844	1.15881	-0.121568	2.03268	2.33349	2.19907	-2.81461	-2.46572	2.47743	3.32678	-0.09307	-0.31404	-0.21036	-0.619758	0.143499	-1.42042	0.52154	1.04457	-0.660107	-5.46279
ENSG00000197381	0.661394	-0.363788	1.77251	-0.325606	0.0102759	-0.922097	0.487594	-1.3574	0.134453	1.37838	1.11856	2.85049	0.988036	-2.54412	0.652953	-0.17112	1.29546	-0.330693	0.525807	0.444648	0.28147	2.47305	-0.825465	-3.19654	-1.70184	0.866889	-0.0220658	5.9235	-0.393284	-0.616833	-0.237475	0.328601	0.333863
ENSG00000127481	-1.32679	0.314705	0.636495	1.25603	-0.950587	3.10333	2.04785	-4.50544	0.377462	1.13355	0.842776	4.8393	1.78881	-1.25885	0.727607	-3.05407	2.93739	1.41148	-0.400956	1.18401	2.0668	0.869255	-1.88583	6.38092	3.25796	1.05474	-0.837699	0.678371	0.111946	-0.930196	1.08534	-1.5722	0.694063
ENSG00000132394	-0.148305	0.995182	-0.163409	-1.57723	-2.47729	0.723504	-0.73268	-0.507225	0.765209	0.855769	1.99915	-3.86578	-0.00369551	-0.533683	-2.70177	-0.373101	0.700458	0.793632	2.46062	-0.30114	-2.08356	-0.604072	1.49742	-0.698418	-0.961111	0.0184618	0.201582	-0.301444	0.951084	0.319471	2.8634	0.659178	-0.223398
ENSG00000137962	2.07493	2.46128	0.101176	-3.49207	-0.550775	2.69564	1.94567	1.36077	1.89557	-0.133447	-1.66822	-0.599242	0.406825	-2.52334	3.83266	-2.60316	0.901782	-3.28135	-1.66325	-2.48611	0.490232	0.846252	-1.19645	0.98154	0.717318	0.632165	1.94758	1.58473	-0.114505	0.316488	-2.29702	0.582457	2.59482
ENSG00000139767	1.34441	0.315353	2.97858	0.461647	2.99197	4.76121	5.94748	0.202999	1.23711	5.53379	1.16011	0.0887868	0.209029	-0.583802	0.122621	1.68167	3.7394	2.61789	0.513556	-0.609496	1.03535	1.17079	-0.925291	-0.105067	-0.368427	-5.3623	2.09578	7.48608	-0.399645	1.11529	1.84617	3.91	0.495669
ENSG00000100979	-2.60872	-0.418607	-2.3425	-0.74292	-1.57181	2.698	1.70938	-0.643009	-2.50726	1.83909	0.712566	-0.418132	4.6894	-2.18093	-0.363938	-1.60358	-0.0436218	1.92305	-3.40008	0.117037	-1.90367	-0.870507	-0.815162	-3.76977	-1.37137	5.37527	1.0978	1.01938	0.529597	3.03371	2.69274	-1.2201	-2.48567
ENSG00000108839	0.844682	1.08684	-0.696159	0.762444	-0.174404	-0.0945316	1.12535	1.42055	-0.243382	-0.421085	1.01049	0.00145976	0.282706	0.972583	-1.0543	-0.248988	0.162769	2.35742	0.770207	3.36031	0.516031	-0.0693441	0.681539	0.391894	2.12609	2.87574	1.7506	0.201843	0.98413	-0.622348	-0.201264	-1.23564	-1.77365
ENSG00000144320	2.23939	-0.3279	0.187486	0.316502	-0.410612	-2.35217	-0.139296	-0.341711	-2.97088	-1.34514	1.36728	1.80896	-1.76863	-4.72199	-0.168423	0.54154	3.08359	-0.00284928	-0.941707	0.820519	1.16728	5.03086	-1.29304	-0.0511877	2.12846	0.698824	1.1569	1.70361	-5.16999	-0.847468	-0.657857	3.30602	-1.96265
ENSG00000124225	-0.399032	3.49566	-0.855628	1.81113	-1.98444	1.7079	2.75271	5.53132	-2.18254	-1.85495	2.13152	-3.83328	-1.89031	0.957793	0.0816396	4.47431	1.36336	0.604374	2.06061	-3.14188	-1.47456	1.35637	2.05099	-0.211231	0.117375	-0.00818351	0.0995858	1.82785	0.611542	-0.394563	-0.405334	0.215641	-1.21519
ENSG00000196689	2.37884	2.11945	-2.53184	-2.74091	0.192656	0.227759	1.87696	0.577957	0.387079	-3.85804	1.2133	0.0621289	0.361593	0.507733	0.296328	-0.714624	-0.243763	-0.573265	-3.25118	-2.2964	0.347855	-4.85811	0.0418689	0.172159	0.0920277	0.937285	0.941387	0.749837	-0.383786	0.843216	-0.0563532	-1.41018	1.12931
ENSG00000242110	-0.101188	-1.47338	2.99723	-0.840689	2.06283	0.767552	1.19016	-3.99543	1.6391	-0.561012	2.31509	0.976352	1.59797	-0.55526	1.53446	-3.37555	-1.35566	-1.28692	1.60552	1.34656	-0.318857	-0.206115	-0.668666	-2.12221	0.766614	-1.37726	1.37535	3.4523	-0.715675	-1.25037	-0.934154	-1.15258	0.0784682
ENSG00000126432	-1.96349	-0.112856	0.394635	0.503967	-1.12389	6.76855	0.191672	1.6079	1.21906	0.591705	0.975403	1.33328	-3.18178	-1.34959	0.0134322	1.39591	0.423775	-0.315118	0.665223	-0.982614	1.0052	-2.06714	1.95639	0.370661	0.102605	-1.63467	1.80397	0.946264	-0.36435	0.877302	1.10898	1.13166	0.0746805
ENSG00000170745	1.63931	1.53227	0.717041	3.78339	0.492936	4.21858	0.148625	4.24881	-3.41512	-3.22727	2.50442	0.583909	-3.44599	0.371828	1.19319	4.51111	2.89613	3.22893	-0.956086	-0.376161	0.420806	0.285993	2.1267	1.74792	1.83374	2.63067	0.0607501	-1.12562	-1.14583	0.928702	0.782436	1.43621	0.528224
ENSG00000157570	0.464412	-0.759141	-0.837244	-0.161647	-2.19887	-1.69342	-0.125953	0.187626	-2.10936	-0.160939	-0.807445	0.591982	0.710893	-0.0967087	-0.318176	-1.29542	-4.43502	-0.648079	1.54923	-2.64592	-0.400148	-0.266354	1.83896	0.99909	0.111812	0.0896182	-0.134498	-2.27105	-1.79541	0.146032	1.90466	0.352584	-1.302
ENSG00000275342	0.47256	2.32936	0.168542	-1.09281	-1.26486	-4.89902	-3.58906	-0.871188	1.49501	2.99192	-0.729689	-1.23202	-2.01114	-0.056463	-2.52119	0.48069	1.02771	1.74466	0.354214	-2.40423	0.200832	-0.624531	-0.588576	2.60944	1.17446	1.42555	0.797532	-1.23292	-0.393522	0.66862	-4.01037	-0.693635	1.00151
ENSG00000109320	0.42044	5.61115	0.604981	3.33866	-0.78119	0.189728	-0.558274	3.29066	0.74236	0.337117	-1.79459	0.260821	1.28582	1.031	-1.36543	0.932143	3.67675	0.677958	0.217009	2.05904	0.143935	1.04506	-1.23018	0.0526951	0.0861061	0.26837	1.79863	-2.16173	1.11677	-0.662109	0.176926	0.865587	2.27363
ENSG00000244486	-3.73034	-3.12937	-1.71737	-1.69968	-4.81265	-1.2726	-1.90499	-3.23063	0.373873	1.25287	1.18738	1.66657	-1.81619	-1.84149	-2.64556	2.63173	-0.702014	-0.400155	-1.40717	0.58799	1.74497	-1.01853	-0.480838	-0.698819	1.18002	-1.55501	-2.68291	-0.924686	-0.228921	-0.313979	-5.79439	-2.49225	1.71743
ENSG00000091651	3.98029	1.09945	0.609925	-1.86143	3.19356	0.667531	0.0182926	-0.4943	-1.6803	-0.458795	5.12384	-0.4464	2.17426	-0.694596	-1.68066	2.82287	1.87039	-0.0738403	0.446065	0.802738	-5.22331	-0.332996	-1.49784	0.919862	-3.32739	0.801878	-0.293051	-2.82873	-3.01743	-3.75629	2.73192	0.592299	-3.09749
ENSG00000178031	-0.636694	-1.22585	-0.832212	-0.794064	-1.45414	-1.03832	2.05016	-2.56605	1.31409	-3.03876	-0.882003	0.543856	0.868989	0.0495487	-1.28871	-0.139479	-0.561107	-1.19002	2.03281	-0.503565	-0.50701	-0.330849	-0.33547	-0.1079	0.800365	-0.509997	-1.19335	-3.15105	0.0909985	-1.24386	0.732495	0.18314	-0.800803
ENSG00000065717	-1.47118	-4.81915	-1.0335	-1.2855	-1.64864	-1.68027	-0.392476	-0.794359	-2.62563	-2.04815	3.02855	0.0298886	-1.28594	0.127498	-0.670086	4.64693	0.2625	-1.50288	-0.758118	-0.978355	-1.22535	1.7092	-1.44364	-1.17491	1.58214	0.0715364	-1.60267	-1.6645	-2.63393	0.836037	0.184192	-0.184898	-0.180159
ENSG00000102904	-2.07872	-1.76592	0.61232	-0.563716	-0.271081	-0.290299	-1.32926	-1.64636	-1.06376	-1.77286	-1.54981	-5.92293	2.97956	-0.149563	0.466121	0.0532839	0.497998	1.95604	0.866396	1.12086	-0.73658	-1.39179	-0.710092	-1.10304	-0.0134078	0.462864	-0.174636	1.03978	1.79925	-2.45441	0.304038	0.126389	-0.284788
ENSG00000165046	0.605354	0.479401	0.558397	1.97171	-2.0304	-0.176001	3.66413	-0.958454	1.44676	1.38734	0.943542	2.43309	0.603318	-0.500059	-3.41433	0.888798	-1.0173	-3.47409	-1.41405	-3.24613	0.721693	-1.3342	0.570941	-0.154226	2.51323	1.29532	3.3078	1.67039	-0.312146	0.494345	0.764442	1.01119	1.32161
ENSG00000143882	-0.993366	-0.987029	-2.7642	0.573088	-0.944145	-1.47719	-0.74194	-1.86391	1.3685	0.155211	-0.813374	-0.619716	-3.05876	-0.954404	-3.12403	-0.883578	-0.9405	-2.05523	-0.109126	1.67096	-1.29525	0.194807	-0.789358	-6.44633	-1.92924	-1.32808	2.89175	-0.0573708	-2.3308	-2.16943	-1.34407	-0.884734	0.501291
ENSG00000143032	-0.444865	1.44969	0.490297	1.60703	-0.536928	5.06276	2.4335	0.884716	0.543824	1.60732	1.08584	-3.45161	-0.15119	-0.686584	-1.15951	0.388085	-1.24379	-3.7028	1.37168	-1.80487	3.67443	1.92565	-6.02403	0.0233564	-2.77049	-0.0323831	-1.08778	3.13607	-0.456504	-0.58413	-0.806599	-0.754757	-4.23466
ENSG00000143398	-2.74702	-1.61847	0.0345825	-0.0841296	-0.409016	2.21786	3.55202	2.26016	-1.08584	1.62175	3.82793	3.36656	3.63934	0.758036	4.30592	1.18768	1.57852	-1.2007	3.88446	-0.76217	-3.79742	0.319489	-0.897667	2.05572	0.760254	5.18029	0.0799641	0.765308	1.1001	3.73164	-3.6923	0.255282	-2.8564
ENSG00000003137	-0.0912451	-1.43626	-2.45725	0.738807	0.00728616	-2.97245	-0.951406	1.62394	2.23279	-0.175488	-0.17619	0.00672713	0.51454	0.0436905	-1.49321	1.24853	5.43155	0.525498	-1.46224	-1.44377	-1.7494	-0.248311	-0.788041	0.842023	0.427527	0.310561	0.766679	0.449085	-3.44729	1.20428	1.65632	1.11257	-0.428772
ENSG00000115414	1.30217	-0.408689	-1.67498	0.536295	-0.922255	-0.228626	0.692979	2.33698	-0.905321	0.38234	1.13156	-1.09719	0.104577	-0.224381	-1.06013	1.23542	0.509664	0.152979	-1.90212	-0.178315	1.13352	1.30965	0.146102	-2.88701	-0.112608	-0.127045	-0.913401	0.943904	-0.150645	3.05954	-0.915079	0.131332	-0.212774
ENSG00000116717	-1.24816	0.626423	-1.4921	0.632786	0.150412	0.701714	0.994233	-0.0498439	1.2748	-0.32727	-0.795996	4.52672	1.10145	-2.74284	-0.116112	-0.653898	2.38999	-0.00482094	1.91009	-0.802106	-1.80268	2.63709	-0.538528	2.73339	2.53725	-0.176238	0.115094	-0.49998	0.397709	-0.269896	-0.63704	-0.425985	-0.561973
ENSG00000130477	0.0088196	-1.80102	1.91343	-0.551067	1.76915	-2.08175	1.13361	2.39899	1.22259	0.40234	0.260074	-0.1569	-0.0426236	2.67479	-0.069484	3.90196	0.748481	0.269068	0.144325	-0.0375748	1.16588	0.880782	-2.37149	0.303442	-0.0385936	0.0829744	-0.0807489	1.16282	0.320519	-1.91616	0.149906	0.356673	0.727447
ENSG00000101327	-1.13989	-1.78291	-1.22683	-1.92616	2.43136	0.96452	1.41561	1.64194	-0.806895	0.738634	1.57206	0.935062	-1.20386	0.451331	0.827201	-0.783719	0.0920707	-4.10241	0.487901	-1.61987	0.546931	1.97676	0.555169	-0.129854	-0.0485188	1.53215	1.92227	0.0979015	-3.36604	-0.531378	-1.03514	-0.427918	5.18699
ENSG00000151353	-0.139434	0.0435199	-1.17059	-0.803133	0.313149	-3.36782	-1.8634	0.986992	-2.94099	-1.49809	-0.631979	-0.0257182	-4.66069	-1.66912	-0.828121	-0.879539	0.0691017	0.0169955	-4.76032	-1.44057	0.683852	-1.24598	-0.282123	-0.481564	-0.904755	0.590659	-0.504555	0.328444	0.451263	-2.91508	-2.68687	1.73688	0.788485
ENSG00000116729	2.48993	-2.11624	-2.43439	-2.01397	0.542094	-1.24136	3.01897	0.192097	0.933146	-0.387198	-3.16383	0.103595	-1.06965	1.19971	-0.0826759	-0.968241	2.83695	-0.803854	0.31138	0.490936	-0.608619	1.55415	0.699619	-3.09988	-0.329474	0.44363	0.16654	0.915315	1.24202	0.272655	0.54142	-0.0434282	-1.32987
ENSG00000213658	4.45261	1.23766	2.21625	0.353914	0.0595337	-2.48085	-6.35779	1.81254	0.503624	0.801431	-1.26488	-2.42374	2.12719	2.78709	-0.430256	1.378	-0.129445	-1.75136	-0.0400581	-3.30369	1.00445	1.05561	-1.72912	-1.703	-0.717472	-2.70494	-0.594432	-2.11448	-0.519523	4.06082	3.03677	1.4522	0.472999
ENSG00000136152	-2.3266	-3.70529	-4.39084	-0.152055	-3.40984	0.528507	-0.74741	0.647265	0.145828	-0.997472	0.915928	2.7916	-3.29564	-2.43342	-2.65303	0.903586	-2.07367	-1.74092	-0.262139	-1.05116	-3.12315	0.225001	-0.587469	-2.56631	-6.31576	-1.71106	-1.08748	1.39854	-3.5248	0.562323	-0.781363	-0.297153	4.83616
ENSG00000112511	2.34713	5.60331	0.130177	-0.346817	-2.98308	1.54932	0.084408	0.738284	2.57021	0.379783	2.29203	-1.06841	-6.22209	0.198195	0.970232	-3.32281	-1.58504	-0.337829	-3.42215	1.24952	-4.69822	-0.893796	-0.243253	0.675515	-0.311584	-2.8969	-2.3252	0.76617	1.9706	-0.368788	-1.18978	-4.13189	3.58882
ENSG00000106341	0.125275	-1.95615	0.593983	-5.49592	0.537312	-0.0439605	1.42462	-1.48568	0.841518	0.495838	-0.23707	0.584719	-0.341657	-2.32157	-0.859579	-0.680062	-5.38672	-0.0300221	0.705787	-0.229036	0.20649	-0.34296	0.0202735	-0.858218	-1.16629	-0.714208	0.282283	-0.358435	1.17002	-1.45745	-1.27392	-0.96839	1.82736
ENSG00000169855	-0.979998	0.640473	1.7537	3.07663	0.195928	-2.32679	0.527236	-0.0416361	2.34706	2.9529	0.657624	1.77332	-1.03449	1.7196	6.57013	0.362967	-0.304461	0.739656	0.12806	-0.824728	0.2936	2.38214	1.72828	-0.290674	0.699333	-0.807168	-1.26814	2.7672	2.2045	1.06346	0.239415	1.50444	1.4841
ENSG00000152137	-1.95132	-1.45856	-1.30663	-1.03141	-0.224614	-1.60733	0.853137	-0.322339	-1.26011	-0.449214	-1.6369	-2.5847	-0.731106	-0.62625	-1.48633	-0.189206	0.0603483	-0.141821	0.246763	1.33219	1.432	2.52378	-1.011	-4.21935	-0.069698	1.78129	1.35813	-0.404744	0.519234	4.05545	0.320344	0.0995372	-0.909899
ENSG00000162595	-1.45392	-0.483265	-0.0697401	-0.706339	-1.59575	0.19893	0.312173	2.88173	0.405108	0.027511	-1.85038	0.889898	-0.920351	-0.278688	3.43132	-0.24329	-0.0224644	-1.46686	0.522007	-0.202165	0.714671	0.730762	0.0322382	-1.44866	-1.20882	0.432138	-3.19817	-0.271567	-1.8421	0.242783	-0.364586	-1.03732	-1.46553
ENSG00000170017	-3.76038	-0.865053	0.515387	-0.12585	-1.07544	-1.38905	-0.99322	-0.67174	1.92961	-0.448587	-0.519754	0.364762	-0.815326	3.09614	-1.29739	1.62243	-0.212138	-0.597071	2.72476	-1.22603	1.7081	0.664336	0.807629	-1.11117	-1.38308	-2.06031	-0.847484	0.890252	-0.970074	-0.128794	1.92452	1.19248	0.0805432
ENSG00000127324	0.890978	0.479378	3.53075	0.730716	1.47352	0.484695	0.84577	3.41372	-0.0856691	-0.737006	0.48	1.75294	1.07999	2.13854	0.536755	1.79312	1.71609	0.999315	3.25233	0.731271	0.312993	0.999184	0.618048	1.49595	3.29749	0.896572	0.355342	1.31042	2.7966	4.57263	-1.02042	0.700478	0.404164
ENSG00000102901	-6.21345	1.45561	-1.69002	-0.519798	0.351966	-2.36878	-0.810667	1.55877	0.495563	0.272226	-0.967602	1.32115	1.97604	-1.31628	-0.307445	1.35551	0.935896	0.746501	-2.11717	-2.51224	-1.09738	-1.96366	-0.198885	4.27526	-0.523032	0.412366	-0.448403	0.964068	-1.82549	0.107508	-0.347004	-0.848284	0.212702
ENSG00000157856	0.83887	0.0920184	1.20761	-0.313544	-3.15949	-1.36912	1.08673	-2.99408	-1.18269	-2.25911	2.73946	-0.51922	-0.329064	-1.65941	0.173034	1.52261	3.09653	4.84391	3.96109	-1.24228	1.87248	0.126342	-1.64327	-0.0904699	-1.72646	0.537581	-0.21305	2.3149	-0.174031	-2.62814	-1.69608	-0.201426	-0.961216
ENSG00000139292	-2.21109	-0.818059	-0.919437	0.110678	0.665631	-0.596496	0.629408	-1.65961	-0.78517	-2.59833	0.406652	0.148714	0.0419531	0.653678	-0.0915353	1.88667	0.838002	0.427397	2.36409	-1.7855	-1.57039	1.26546	-4.96597	-0.0458885	-0.0856372	-0.470901	-0.622914	0.21409	0.642061	0.205163	-2.45676	1.46615	0.0516813
ENSG00000112514	-0.165948	1.43055	1.72321	2.39032	-1.09895	1.41828	-3.08507	-2.26603	1.66549	-1.4432	0.203679	0.644089	1.79036	-2.19279	-0.573497	2.02891	2.7484	-0.594403	1.55282	-1.08661	0.456647	-1.13709	-2.18211	-0.497012	-0.139323	0.903485	-1.18951	1.6669	-1.69182	1.59208	-0.0690343	0.0583219	-0.659434
ENSG00000143627	0.00691302	-0.947281	0.81042	-1.07354	-0.815691	0.113291	-2.31582	0.522306	-0.465601	0.455272	-1.60753	0.128593	0.921641	2.33203	-1.04565	1.08278	-0.577154	0.50531	-0.0350177	-0.321349	0.871752	0.654945	1.13995	-0.893296	-0.18409	0.752321	-0.936664	0.997137	-0.925294	-0.977224	0.01762	4.10332	-3.65596
ENSG00000169271	0.152861	0.174952	-0.020459	0.393805	-1.85872	-0.190042	-0.738122	-0.852788	-0.0149899	0.0555387	-4.01825	-1.54162	-0.321695	-0.210733	-0.0449721	-1.06645	-0.261963	-1.03021	-1.22496	-4.60386	-1.75385	-0.916452	-1.53962	0.959841	0.430678	-0.460756	-0.729298	-0.497464	-1.84192	-1.19912	-0.345974	-1.00227	0.178538
ENSG00000080493	6.24543	0.177636	-1.40835	-2.77245	0.27161	0.271314	-0.60893	-1.51484	2.12333	-0.444471	-0.249973	4.10115	-0.74316	0.265082	-0.294453	-0.690351	3.52659	-2.74152	-1.26096	1.23659	-1.222	3.547	-0.0911204	-2.17195	-1.63294	1.23951	-2.24876	2.77	0.907223	0.419905	-0.958014	0.665517	-0.0803112
ENSG00000053747	1.61233	-1.79738	-1.71201	-2.26957	0.767829	-2.4069	0.015134	0.260585	-0.157349	-0.208759	-0.97111	0.302245	0.172629	-0.425383	-2.75267	-0.284813	-1.33073	-0.334869	1.53952	1.45624	0.234946	0.0453163	0.210518	-6.45249	-1.17338	-0.28968	-0.753869	-1.53013	0.256002	0.0833734	-0.739943	-0.472181	4.12733
ENSG00000103152	0.95028	2.05918	0.237381	0.772617	0.423434	-2.96137	1.87453	-1.11526	3.2474	3.7465	1.50563	0.846718	0.083825	-0.645732	0.402829	-3.63813	-1.40516	-0.0312337	-0.562876	-0.586105	-0.213503	1.23594	-0.417073	1.87255	-3.43625	1.86082	-0.145544	-1.83646	-0.0751893	-0.73465	-1.26911	-1.22186	0.209824
ENSG00000064687	-0.852383	2.88925	0.882519	-0.453172	5.70398	0.586389	2.79991	-2.0346	0.0239727	2.88168	-2.40832	0.342467	0.256119	3.0191	2.83865	1.2005	1.57934	-0.628411	1.54372	-0.920847	8.12487	0.418783	0.41523	5.63221	-2.54477	-0.281413	0.795003	0.0446877	1.60625	-3.13762	-0.415703	-0.646616	-0.658071
ENSG00000179915	2.04126	1.80678	0.568591	-0.0466486	0.242419	1.32194	0.499844	1.23213	1.23847	-0.572976	3.16759	2.58152	1.03179	0.463022	1.86109	5.95018	1.13516	1.63792	3.44507	0.514528	0.22976	2.07643	0.458215	0.40202	-0.63845	-1.29701	1.02091	2.77666	3.01506	3.99839	0.948803	-1.05688	1.62024
ENSG00000106012	0.135004	5.49142	-0.784249	-3.39164	1.22852	-0.345394	1.04573	-2.0819	2.52043	1.01207	5.27091	-1.9804	-1.73875	2.1023	-0.180991	0.653958	4.34266	-1.64598	-4.9657	0.947993	1.53278	-1.99077	0.589174	0.880273	-0.510437	-0.184156	2.9969	0.0409894	3.41435	-0.256269	1.7244	2.08508	0.553323
ENSG00000002745	2.75876	-1.04992	-0.322197	0.364236	-0.861658	2.10061	0.783924	-2.19573	1.7269	-1.05517	0.380449	0.111521	0.558543	0.65102	2.30508	-2.19306	-0.341553	1.03095	-2.07203	-0.45361	0.195855	2.33204	2.37612	-0.38559	0.813541	0.510493	0.520443	-0.0128316	1.74973	-0.275123	3.64285	1.53386	-0.560309
ENSG00000125657	-0.288971	-0.0917281	-0.440055	0.0400209	-0.714191	-0.523904	-0.169276	-0.404094	-0.439959	0.0653168	-1.30497	-0.772424	-1.30453	-0.463848	-0.826987	0.0916191	0.167419	0.10451	-1.53377	-1.4485	-2.45833	0.230088	0.11518	-0.768245	-1.18418	-3.81497	-0.486366	-0.439625	-0.247458	0.350582	-2.08682	-0.438529	-1.06214
ENSG00000178035	-0.0240331	0.756841	0.280161	0.719914	-1.06859	2.91164	-0.0306553	1.14761	1.38525	-0.689599	-0.994177	-0.226539	2.33392	-0.466405	-0.252637	0.957165	1.44026	-3.18437	-0.980175	-2.92874	-0.451451	3.28941	0.417231	-0.512816	-0.980287	0.311427	1.05584	1.44218	3.9567	0.681221	-0.0208524	5.78435	1.64606
ENSG00000175183	-1.84247	0.651965	-1.54759	0.736507	-3.77985	5.49342	3.01593	-1.8063	0.258741	2.13368	2.2071	-1.89567	0.969214	2.40647	0.879698	1.14228	4.31297	2.8887	-0.265506	-4.21894	-0.368177	-1.28707	0.919215	3.60072	0.962149	0.128569	0.669861	-0.0363308	0.368839	0.9408	-0.213772	0.213747	-2.09987
ENSG00000196376	0.786223	-0.174128	1.8633	1.79937	-0.618533	3.28259	0.585607	0.972106	0.79943	-0.35138	0.515678	-1.26548	-2.49664	0.657925	0.924275	-3.49185	2.40509	-0.0858477	-1.16537	-0.723854	-0.592622	1.51423	-0.624808	0.57145	-2.32023	-0.300249	-1.06951	0.365432	-2.24306	-0.400883	-0.297584	-0.0351475	-0.290373
ENSG00000176623	-1.45627	-4.21864	-1.35941	-2.51209	0.0461383	-0.548267	3.21917	-0.98763	-2.31132	-0.719726	3.33896	-1.97648	-3.3893	-0.764692	-0.498283	-0.385268	0.107499	-0.412898	0.683323	-0.93865	-0.990145	-3.54862	1.497	-1.41372	-1.23763	-2.11331	-1.97351	0.490288	3.09847	-1.60718	-0.97092	-0.0948129	-1.5572
ENSG00000091536	-0.416287	-0.878397	0.87954	-0.982507	1.49413	0.301377	0.313312	2.67441	1.89308	1.92013	4.25299	-0.779758	0.296996	0.411944	0.442261	1.13979	3.01685	0.852759	0.966507	0.67102	0.268007	0.158084	-0.236178	-3.22717	-0.928833	-2.88451	-0.382379	-1.73646	0.480381	1.39962	1.48424	1.652	1.79901
ENSG00000224982	-1.23535	1.77077	1.16389	1.11787	0.357738	-0.842183	0.528328	-0.945682	-2.00837	-0.697734	0.609877	-1.97912	2.34946	3.26981	0.246331	2.79796	0.417917	1.32608	0.789471	-1.64047	3.73463	0.06873	3.00776	0.504166	0.422873	2.0419	2.7358	-0.461732	5.83617	1.91985	-2.74262	2.15419	2.35065
ENSG00000198682	-0.428885	0.378721	0.406564	0.223871	-0.555199	0.0576344	0.603974	0.652675	-0.472057	0.932285	0.145702	-0.0269322	0.0168104	0.544221	0.499636	0.435982	0.502064	0.342033	0.128655	0.432038	6.51886	0.581376	0.380836	-4.11431	-0.372743	0.0801886	0.22942	0.0943475	0.123283	0.852572	0.374794	0.00319059	-0.168813
ENSG00000144407	-0.164852	-0.168002	-0.149107	-1.09132	1.11229	-0.483054	-0.320751	0.103977	0.136784	-0.521262	-0.517047	0.317389	-0.656259	-0.416767	-1.44855	0.281503	-0.158575	-0.0920635	0.583146	-2.03473	-2.61438	-0.100893	0.344159	-0.400572	-0.621352	-0.48798	-0.798776	-2.06677	-1.88804	-0.495338	-0.267817	-0.227022	2.66331
ENSG00000165821	0.765588	-1.78512	-0.192454	-1.67231	-0.197361	0.0273578	-1.25313	0.560968	0.405102	1.61386	3.14681	1.1429	1.83083	-2.29179	2.21404	-0.50306	-0.415266	2.76801	1.64897	1.80178	-3.22991	2.75793	-0.756802	-0.916093	-0.35227	0.856367	0.170076	4.39998	-5.32053	-0.978219	-1.09074	0.404415	-0.884515
ENSG00000204396	0.80326	0.873546	-0.0185161	3.81719	0.632913	-1.60215	2.43872	0.849813	0.681251	0.484288	5.58364	2.88604	5.5515	0.113042	1.88287	1.02384	0.820051	1.88398	0.109624	1.87414	-0.380538	-0.459997	2.48507	2.5664	5.2172	2.39426	1.58707	3.45135	-0.417793	1.41895	2.27258	2.49993	1.03446
ENSG00000165966	-2.71785	-2.14507	-1.75555	-2.48469	-0.732944	-2.1457	-0.37463	-0.831295	0.258909	-0.126614	-0.437299	1.15764	-1.22488	3.58032	0.862177	-0.321137	-0.731985	-0.154714	-0.387177	-3.43955	-0.448762	-4.15419	-6.05751	2.46032	-2.39146	-0.387561	-0.607497	0.232813	-2.50052	0.130157	-3.49782	-1.97369	-0.0484994
ENSG00000104722	-1.17568	-0.959907	1.03841	5.20059	-0.641673	2.68587	0.396879	1.48953	0.243213	0.566622	0.851173	1.8618	-0.103107	0.185296	0.0142638	0.464056	-1.49779	1.4748	1.7798	-0.0183152	-0.960003	0.474853	0.702859	0.216124	0.438277	1.435	0.523725	1.33026	0.100226	1.09508	1.32631	0.0523157	-3.95091
ENSG00000125780	1.05568	0.418677	0.280626	2.27065	-0.212437	-1.30072	4.71575	-4.27199	-0.95444	-1.04827	2.74305	-1.02494	0.416701	-1.55577	-3.8592	0.296495	-0.301033	-0.894788	0.281742	2.19942	-3.1827	1.75805	-1.6132	0.493016	-1.93291	-3.90644	-3.02804	-1.07467	-2.2521	-0.246749	0.962032	-4.46971	0.56587
ENSG00000111860	2.73299	-2.83255	-3.42543	-2.58516	-0.457247	0.0776594	0.273676	-1.00841	-1.06231	-1.47178	-0.519262	-0.16112	-0.190817	1.40184	-0.46295	0.429628	-0.42009	-0.88052	-0.512286	-5.15916	-0.238047	1.44089	-0.376405	-4.53868	-0.804334	-0.0884347	1.79338	0.736661	-1.06916	-0.720093	0.233141	-0.292434	1.36809
ENSG00000156299	-1.27006	0.182024	-4.89438	0.476078	-1.46538	0.338455	-4.17153	1.32452	2.58371	2.54102	5.1869	1.03326	-0.723183	0.747788	0.519026	2.43611	-1.2419	-4.75953	-2.56437	-0.0837445	-2.06575	-4.2341	-1.3062	-6.99369	-4.34856	-0.307436	-0.738798	3.74128	-1.16856	-1.05785	-3.005	1.15896	-0.256293
ENSG00000107863	-2.89586	-0.394343	0.701839	0.608889	0.857199	0.0342987	-0.188203	0.939672	1.24599	0.57995	-0.914034	1.06294	-2.81231	2.01358	-0.159263	0.418426	1.47927	0.178541	-0.00193838	1.06214	0.759904	-5.2807	0.698058	-0.0885146	0.044578	0.317643	0.124909	-1.6786	0.268086	-0.741043	0.917521	0.603805	-1.43496
ENSG00000256043	-0.871938	1.21001	-1.82878	-2.07248	-3.44709	-2.18789	1.11654	-1.19328	1.6617	0.799739	-6.23479	-0.486245	0.738083	1.55237	0.284755	0.838479	-3.01089	-1.43128	-0.028164	1.95958	-0.877547	0.865932	-2.4093	-2.91825	-1.14701	-3.42592	-1.30861	-0.29431	-2.04142	1.49009	-2.19753	-1.21941	-0.50149
ENSG00000184307	0.598226	-0.534948	-0.771162	0.0808859	-0.242048	6.92258	-1.00693	0.198535	2.96426	-1.64926	1.59998	3.11495	-1.78008	1.52569	-1.61145	0.280355	-0.879107	2.29533	-1.53662	0.689629	4.02456	3.1229	0.951383	0.664404	-1.97627	0.496814	0.907223	-1.15597	-0.741946	0.257235	0.640818	0.871191	-7.11446
ENSG00000164318	0.68681	0.243799	-2.78254	-5.07749	-0.895971	0.0282038	0.224794	2.80048	2.4766	0.138565	0.333799	0.779802	0.20065	1.48443	-1.05511	-0.111419	-0.298645	0.527966	-1.35706	1.39436	0.148739	1.00575	-1.35571	-0.869603	0.478056	0.420745	0.387557	1.12461	0.64416	0.162965	1.64927	0.58423	1.37442
ENSG00000112394	2.20469	0.573701	-0.353831	-0.977253	-0.0490065	-0.172726	-2.16511	-0.406441	1.50212	0.121701	-2.2872	-1.59994	-1.18665	0.535359	2.67098	2.90772	-0.0923229	-2.75492	-2.51086	4.6842	-0.616141	1.29607	-0.0206964	-0.264757	0.225284	-3.18804	1.18008	1.78987	-1.72377	1.91637	-0.68658	1.29899	-1.75002
ENSG00000157985	-4.37226	-1.40312	-4.5934	-1.27548	1.73315	3.12442	-2.21272	-0.510332	-2.40712	0.382739	-2.28328	0.533649	3.63062	0.312931	1.68779	-0.777165	-0.548554	0.906122	-0.299948	-0.238365	-0.01585	1.84169	3.93528	0.479424	-0.00744384	2.38044	0.824802	-0.429909	-2.03141	0.651695	2.73506	-0.136542	-1.47924
ENSG00000065054	1.21798	-4.16804	-0.256632	-0.597181	-2.17941	0.935099	-0.957686	0.627805	2.61483	0.586177	-0.524717	-0.0881035	-0.675296	1.81655	-0.690286	-3.99722	0.266214	2.2984	-0.330939	-0.0482536	1.19447	2.52966	-1.2236	0.123206	-0.731437	-1.97141	-1.30862	1.42924	-1.11687	1.26079	0.666882	-2.36683	-0.587211
ENSG00000119227	0.167548	-1.37022	-0.0597567	0.924303	-5.33454	-0.281075	1.42462	1.99347	0.808471	1.84131	-1.1877	-1.54726	2.49959	-2.29641	-0.505879	-0.123887	0.0107344	-3.25534	0.41963	0.115692	1.5467	-0.641738	-1.14088	-0.683689	1.55849	0.168442	1.80951	-0.177149	-0.384473	-1.13866	-0.594966	-0.21631	1.21998
ENSG00000154678	1.48169	-0.182513	0.334865	0.396062	3.88162	0.297337	-4.01443	0.375378	-0.390064	-0.0930544	1.25705	0.515932	0.220761	0.0693805	0.738049	0.992011	4.01533	-0.592431	0.557895	4.4811	-0.395631	-0.736869	0.179743	-0.08511	0.0887549	0.440486	0.392723	3.44664	-0.572139	0.977293	-0.196658	-0.320844	2.51823
ENSG00000134548	-4.96256	-0.541695	-0.954597	-1.5332	-2.1529	4.31943	-0.571874	-0.440498	-1.02545	0.89929	-3.47081	-2.5459	-1.74306	0.32716	-1.45141	0.435287	0.57872	0.172796	-1.82326	-1.44544	1.66044	-1.32867	-1.21653	0.797444	-2.19987	-1.9813	-1.12689	0.037104	3.56661	3.0592	-1.9984	0.941426	2.49204
ENSG00000100345	-2.83604	1.03115	2.86932	-3.54116	-1.17997	-0.209568	-3.91849	-0.144301	-0.0721469	1.50853	1.00196	2.34365	-0.465748	-0.657716	0.0475915	-0.305947	1.93192	1.57871	-0.654504	0.0924869	1.06144	0.450043	0.240537	0.714424	-1.75947	-2.18651	-0.166826	1.05328	-0.00576727	0.866068	-0.314154	-1.0995	1.02162
ENSG00000164692	1.66461	-0.339859	-0.451256	-1.0758	-1.25761	-0.757067	-0.647191	1.75322	0.580287	0.269879	1.35196	-1.16146	-0.361457	-0.69335	-0.819119	-0.317886	1.41971	0.17164	-0.493415	-0.205921	0.93175	2.05559	2.12668	-1.30972	0.0545229	-0.36645	0.458158	1.17083	0.0139797	1.70642	0.553573	0.505959	0.611148
ENSG00000165609	-1.22526	-0.807611	-1.12194	0.56453	-0.0759355	-2.01527	0.256652	-0.602031	0.292553	3.95946	-0.285743	-0.360827	0.814952	0.484022	-2.74845	0.507773	-1.76505	-1.074	0.571653	-0.488563	-1.65322	0.122659	-0.395825	-0.910893	-3.57901	-1.42723	1.98849	1.43647	0.634564	-0.207246	-0.800356	0.152741	0.630361
ENSG00000134020	-0.758283	1.29186	2.97051	1.27868	2.25442	2.0065	-1.68335	-2.09456	3.42901	0.778251	2.42815	-2.55917	-0.425773	0.662945	-0.686657	1.55565	3.70077	-3.11204	1.09636	0.181238	0.902526	1.4282	0.293218	-1.97477	-0.629402	0.099746	0.526698	-2.00049	1.40376	1.0867	1.09498	-0.646103	-0.229327
ENSG00000163975	-1.39654	1.47791	-0.367779	-0.760466	-3.09628	-1.45357	-0.195922	-0.253383	-0.70483	-0.553115	-0.459002	-1.62452	-3.79769	1.63996	-1.94153	0.921462	-1.70694	-1.23645	-2.37146	-1.96307	-1.46196	-0.555181	0.926992	-1.76067	-1.57251	-0.998676	-1.68926	-1.7052	-1.31644	-0.997529	-0.151101	1.73612	0.917536
ENSG00000145431	1.94728	0.313065	0.889527	3.1023	-1.81031	-0.165943	-0.197325	-1.1622	0.277557	1.73046	-1.27744	-0.780725	3.01344	-2.97673	-0.395706	-0.482912	-4.47267	-0.205729	-0.814612	-1.04904	-1.69671	-2.68656	-1.36626	0.515005	-2.20424	1.76651	-0.703805	1.07192	-1.40117	1.75923	3.04448	0.454683	0.279488
ENSG00000215475	1.31534	2.21946	1.16242	-2.09303	-1.07047	1.72124	2.6429	-1.21219	3.10962	1.44027	-1.06027	0.158437	-0.475995	0.211881	0.0589483	-2.09572	-1.74501	1.93068	-0.702593	-2.61685	0.491523	0.766437	-0.469364	-0.220418	-0.742831	1.5933	0.494801	1.31698	-0.679213	1.09226	-4.02062	1.3103	-3.90641
ENSG00000172667	1.54443	-1.01332	2.37232	0.566054	-0.675316	0.0891138	0.654249	1.76187	-0.723706	0.48289	0.518959	0.855188	2.44343	-2.35032	-1.20947	0.00804158	0.342682	2.5009	0.634986	-0.967642	-0.09174	4.76828	2.24487	2.09942	-0.926582	-3.25643	0.0269963	-3.72001	-1.13865	1.04428	0.279261	-1.63476	-1.65259
ENSG00000151465	-0.139858	-0.356988	1.93312	-1.04896	-1.59324	2.94807	0.0979682	-0.23534	1.93573	-2.29975	2.59545	2.45178	-0.848109	0.770308	-1.0329	-3.28985	0.407951	0.583988	2.94285	-1.39572	-0.421696	-1.10901	-3.18823	0.0652047	0.103592	-0.234906	1.28204	1.03625	0.211079	1.11763	-2.96235	-0.639328	1.11206
ENSG00000164972	0.0514206	-0.5887	-0.231875	0.122243	-0.0631892	-6.3151	-0.257702	0.312264	-0.266653	-1.12141	0.133122	0.204673	-0.0172875	-1.0223	-0.790618	-0.286723	0.0719969	-0.0452182	0.593712	-0.816812	-0.0592238	-0.709101	-1.26757	-1.19754	-0.595129	-2.01286	-2.51279	1.11362	-1.70255	0.545421	-0.190846	-1.86961	-1.26806
ENSG00000182054	2.00976	0.498271	-0.640542	-0.442132	-0.480326	0.352912	-0.456187	-0.451099	-1.72577	-0.194169	0.0605478	2.42032	1.84646	-0.128179	-1.35217	0.221035	-1.8121	1.83559	-2.08573	1.00148	-3.36001	1.7595	-0.684364	0.473212	0.826131	0.635424	2.77817	2.19469	2.29165	1.28347	2.10626	-2.41737	-0.866739
ENSG00000165730	-0.318859	0.246546	1.87181	-0.696593	0.578091	0.701714	2.95206	-1.00283	-0.884938	-0.605889	1.33409	0.381363	0.150755	-1.53085	-0.142674	3.55712	0.304579	2.28391	0.295673	0.554023	-0.0844953	5.56543	-0.600812	-0.107608	-0.099308	1.39346	1.87711	0.549901	2.92308	0.956903	0.389933	0.701228	-0.444439
ENSG00000153237	-2.84145	-0.948766	-1.4631	-2.8964	1.04377	-1.20881	-0.226313	-0.202875	1.64844	1.85825	-0.663633	-4.74158	0.0433442	-0.96605	1.41142	-1.00227	-0.163176	-0.244921	-1.77421	-0.770099	1.35115	-0.464056	1.23392	-0.184366	-0.913639	0.424575	-0.20215	-1.15976	-2.35356	-1.65075	-2.42816	-3.01752	0.735415
ENSG00000104671	-1.044	-4.38672	2.1527	-0.535556	-3.37577	-4.1653	2.67962	-2.17751	0.710533	1.99316	-0.710667	-1.97199	-1.58774	-2.28119	-1.40032	-1.22068	0.12547	-0.835743	0.118288	-0.858975	0.546779	3.61653	2.75238	-0.187735	-0.188649	-1.9617	-5.04942	2.31947	-0.602787	3.02034	-0.783882	2.50735	-0.816463
ENSG00000166796	-2.59625	-0.561247	1.1139	-1.35061	-2.41134	-2.71432	-2.50635	2.33522	0.187101	-0.930691	-1.21613	0.7174	1.2922	2.18047	-2.23353	-1.31226	-3.70987	1.69717	-1.65305	-2.63857	-0.401707	1.95707	1.09467	-1.76871	-2.02205	-2.33528	-3.6766	1.68615	1.03747	0.0461263	-3.30473	1.64459	-0.170086
ENSG00000099785	-1.57061	-0.580414	3.31857	5.19598	-0.105021	1.40708	-0.46303	2.11808	0.150187	3.37136	4.8777	0.977596	-0.530401	2.31966	0.900165	0.911014	-0.396693	-1.55147	-0.255408	2.77869	-0.489403	0.131409	-2.4271	-0.812649	-1.41407	-2.45024	-0.815618	2.64248	1.10373	0.355839	0.467678	-0.223169	0.473646
ENSG00000198945	-1.64897	-0.738661	0.0998354	-1.33584	0.485247	-0.348215	-0.0175543	1.39424	0.752906	1.26511	1.96627	0.952451	-0.448549	-1.32082	-0.0234489	0.90326	-0.415492	-2.21527	-3.6373	0.488174	-6.69152	0.153819	-0.272647	1.36926	0.235702	1.25021	4.87043	2.37302	-1.51378	0.0804921	-1.87092	0.278514	2.7126
ENSG00000134215	-3.27643	-3.6262	-0.193807	-3.76628	-1.23593	-0.686042	-0.83669	0.262075	5.93442	0.0850904	4.57629	1.6109	0.597168	-1.09024	7.95019	1.76063	2.42131	0.00476696	0.735722	2.59437	2.33742	-1.28334	-1.17955	1.71038	1.36285	2.46477	-1.37063	1.53922	-0.921184	-1.57209	0.00598356	-1.43567	-0.602972
ENSG00000184650	1.33179	-0.336137	0.878843	2.46253	-2.69293	0.180565	0.336497	-0.626581	0.345116	0.916372	3.37926	-0.548693	2.0265	-0.298754	0.00816897	-1.32683	-0.300667	-0.0725295	0.434732	-0.703343	1.7285	0.644665	-0.61443	0.263882	0.249353	-0.153864	0.181696	-0.28308	-0.33285	-0.308026	2.29081	0.116653	0.468847
ENSG00000197077	-1.14781	0.0232665	3.4225	-5.68951	0.420665	-3.3775	-0.203263	1.39772	2.75883	0.401172	0.88859	1.4352	0.21303	-7.46581	-0.362216	-0.806252	2.04852	-2.70648	0.674424	-2.06578	-5.40101	-4.05822	-0.357384	-0.88704	-0.274275	0.386762	2.74827	-0.433203	-2.80746	0.0951233	-0.534935	0.537973	0.679401
ENSG00000135535	-1.05393	-0.343421	1.34132	1.34393	0.241841	0.259726	-0.892317	2.87131	1.00999	0.173547	-0.567431	0.0411947	-0.509221	0.185151	2.50278	0.0934668	0.19219	-0.0774978	0.157474	1.708	-1.15141	1.88954	0.535724	0.216504	-1.13434	-0.274986	-1.71035	1.07173	-0.856286	-0.590706	-0.447075	-1.06765	3.18798
ENSG00000088992	-1.07052	0.933416	1.54322	1.81615	-2.18276	0.0698816	-3.34562	0.758936	1.14596	-0.739681	2.67608	0.734577	-1.90548	1.35537	-1.6646	-2.07495	0.904701	-1.48276	-0.0233517	1.5044	-3.04267	0.0677687	0.456611	-1.7758	0.797566	0.296378	0.234943	-1.05139	0.545222	0.163172	2.0104	1.02994	-0.708647
ENSG00000136193	-0.95402	0.402011	0.596895	-0.0972201	0.32491	-2.01756	0.398138	-0.987565	0.857252	1.36901	-2.5249	-3.17354	-0.519429	-4.11885	-0.43961	-1.06746	0.041416	0.658167	-0.14325	0.210968	0.619129	4.09486	-1.00901	-0.12049	-0.203701	-0.59906	0.406659	-0.357339	-0.619668	-0.140222	0.623966	-0.829695	4.168
ENSG00000168016	-0.924101	-0.730165	-0.0006616	1.88415	0.118295	1.49816	-1.78387	0.224324	0.311658	1.24193	2.35393	0.481115	0.789446	-1.1518	-2.0352	1.37584	1.13129	1.18996	1.81827	0.673665	2.15997	-0.838792	0.0556889	-0.731735	-1.42756	0.14643	0.747151	8.00864	-1.31815	1.53113	0.853202	0.220459	0.823579
ENSG00000121361	2.29122	0.184402	1.86826	2.02164	2.3415	-0.754639	-1.51654	-1.34236	2.04089	-0.527634	0.0123011	1.19576	-0.246425	-0.489491	-0.655675	-1.18691	-1.43966	-2.58449	1.141	3.71313	2.4637	0.146203	-0.151384	-0.38222	1.90782	1.01601	0.383332	-0.415821	-1.26594	0.51732	-0.874194	0.562026	4.00525
ENSG00000001460	0.355769	-1.19492	0.334997	-3.91497	-2.62744	0.0280813	0.629193	-0.0496693	-0.730959	0.975036	5.33026	4.96963	-1.74285	-0.582795	-0.0508514	0.0347523	-0.184818	1.35483	0.58551	-0.862972	3.18835	-0.11295	-0.231847	-1.24848	-0.786306	1.86502	-0.0535467	0.639379	1.60297	0.986081	-0.120493	0.759109	0.0793755
ENSG00000170579	-0.0237464	0.356034	-0.519177	-0.0824119	1.37727	0.381229	0.000632747	0.589813	-0.40243	-0.561817	0.105404	-0.773442	0.0601111	0.595946	0.0244696	5.33463	0.405608	-0.0970382	-0.0232578	-0.202642	1.0292	-0.639465	0.810578	-0.483253	-0.953322	-0.502143	-1.4719	2.34414	0.0350853	2.01688	-0.296893	-1.22703	-2.36155
ENSG00000124209	-0.64603	0.357053	0.784003	-0.922871	-4.01963	-0.530207	-1.0598	0.907963	0.177825	0.150541	-1.34692	2.7682	0.285075	0.0944058	-0.166437	0.555612	-0.8194	0.988867	0.460033	2.2484	-1.14905	0.339876	0.644075	0.338928	0.284276	0.601149	-0.164536	-0.921796	-0.0270993	2.48672	0.678312	-0.308864	-2.27373
ENSG00000177674	-4.0684	1.71357	0.218675	1.03805	-0.546862	0.203992	1.28945	-3.46724	1.47472	-6.60397	-2.28365	1.09859	-1.08169	-3.21311	1.63274	4.67223	-4.02744	-0.217455	-0.213779	0.726814	2.07619	-4.18453	0.494607	-1.31055	-6.65063	-2.45532	-0.89448	-0.412136	-1.78811	0.668147	0.115419	0.524815	0.518642
ENSG00000119541	-2.26309	-4.89312	-0.69521	-0.376319	0.756665	-0.590646	-0.0238128	0.566312	3.59582	2.87268	-2.27852	-2.17189	-0.322072	-1.34704	-0.603579	-3.17093	-0.871605	0.627867	-2.12936	-2.46263	-2.0215	0.142344	0.792742	-2.14677	-1.52598	-2.21991	-0.527866	0.111091	-0.988447	0.470435	2.13098	0.951285	2.49609
ENSG00000167657	0.970973	0.549274	2.6044	-2.33689	2.81218	1.07981	1.8592	1.20047	-2.96925	1.18257	2.31374	-1.38143	0.48536	-0.143769	0.353096	0.368306	-0.743957	0.05122	-0.124033	0.00422739	-0.158443	0.352272	-0.267377	1.17072	0.794649	-1.29162	3.48813	0.171156	-0.191941	-0.327555	-3.15202	0.331639	1.82915
ENSG00000136689	-0.876901	-0.541982	-0.301475	-0.656212	0.73226	1.96939	-0.61502	-2.41361	0.662651	0.24608	-0.973959	-0.209374	0.150811	-0.504911	-0.184984	-0.304546	0.115168	-0.532453	-1.5033	0.178825	1.02254	0.852223	0.820763	0.542113	-6.58085	-4.05287	-1.11363	0.245109	-0.266389	-1.82775	-1.92935	-0.64957	-3.0643
ENSG00000001461	-3.26814	-0.0788593	0.283973	0.71356	-1.6506	3.4762	-1.81372	-1.51994	-0.613148	1.68829	-0.956811	2.29005	1.10631	-0.570356	-0.149202	0.341082	1.80675	2.13597	-0.688743	1.12664	1.74327	-0.485751	2.14886	-0.466067	-0.257549	1.20782	3.50373	-0.582289	-2.41602	-0.609995	3.76621	-0.27103	-0.151191
ENSG00000115307	2.33995	4.05929	1.63566	3.76509	-2.05724	2.96688	0.685663	1.03576	2.64365	1.75863	-0.866625	1.15058	0.793994	0.089578	-1.44747	-1.67894	1.09876	-0.125485	-0.664466	2.62682	-1.37437	3.27737	0.331211	0.735596	0.649789	4.744	-0.600312	2.48441	0.243213	2.39441	0.501481	1.32256	4.17472
ENSG00000143867	0.563856	-0.529988	-1.26081	-1.73044	-1.44438	0.0399006	0.163276	-0.699837	0.0482947	-0.0125796	1.67892	-0.664197	-0.353701	-0.699836	-0.108726	0.828978	0.459488	0.79212	-1.12996	0.436368	-1.18169	1.81187	1.4641	-0.027106	-0.0581228	0.700729	0.0221928	2.25437	0.624278	0.0376291	0.63161	-1.13618	1.00304
ENSG00000277586	-0.0622768	1.90514	0.180895	1.57953	-0.354076	0.395158	0.122883	0.314551	0.388658	-0.416763	0.974911	1.57184	-0.0214283	1.74756	0.197784	2.36444	-0.137546	1.31388	7.49107	-0.822248	-1.23033	-0.313729	-0.666084	-0.301866	-0.787006	1.1663	3.10692	1.86529	2.82379	0.946581	-0.143039	-0.468918	-1.22097
ENSG00000125845	-0.775743	2.50209	-4.63278	0.306445	-3.62155	-1.84261	-0.272033	-0.416548	0.366896	-1.31464	-0.941244	-0.701164	1.01997	2.61578	0.880276	-0.944304	0.237515	2.27897	-0.25503	0.169756	0.741435	-1.61329	3.32679	-0.90211	-1.3965	3.43483	-0.330765	6.40984	0.0961909	0.96138	-0.429627	-0.00557187	-2.77313
ENSG00000273749	1.40007	0.549283	0.318223	0.184098	-0.355965	-0.224346	-1.27007	2.55902	0.82089	1.92789	-0.14438	0.217903	-0.914919	3.82421	-3.03764	-0.575543	-1.87885	-0.106853	0.875827	-0.900128	-3.1981	-0.14761	-0.57911	-3.2017	-0.387224	-0.747869	-2.76739	0.85461	0.380549	-2.49061	0.30414	0.170402	0.467541
ENSG00000111879	1.98611	-0.316239	1.06752	-1.67045	1.50184	-1.11382	0.0360137	-1.64253	-0.900344	1.07046	0.0192844	-0.489067	0.222324	-0.622509	-0.729526	1.51574	0.252337	-1.37954	0.389436	0.322749	0.422599	0.156655	0.0589262	-1.45723	-1.05022	-0.203521	-2.31959	1.58364	1.32174	-0.772314	0.0559878	-0.258502	0.504179
ENSG00000156253	0.157413	-0.286099	-0.015277	-3.71469	-1.81215	0.272826	-0.139126	-0.714062	-3.41023	-0.00252401	4.92881	1.32332	-2.43784	-0.195564	2.41482	-0.0271102	-0.335027	1.77437	1.32707	-4.64953	0.257951	4.1224	-1.40461	0.138953	0.410375	0.585715	2.52903	1.72895	0.0364505	6.08127	-1.4088	-1.33077	-1.73447
ENSG00000172554	-1.05622	-1.39523	-1.19575	-4.72433	-0.561563	-0.147453	-0.354397	-0.136363	-3.13297	-3.88968	-2.48845	-0.699312	-0.0709197	-0.93087	-0.288583	-0.618819	-0.144054	-0.174225	-1.49748	-1.40701	-2.48002	-0.180983	1.52385	0.172952	-0.540582	1.62295	-0.895427	-0.406592	0.131568	-0.197399	1.68452	6.50974	-2.4024
ENSG00000172575	-1.64004	0.435282	-2.04008	-2.11883	-0.526825	0.971723	0.0134223	-4.87376	0.417462	0.389254	-2.23348	-0.474776	-0.597606	0.297872	-0.210327	-0.988726	-0.0716494	-1.70488	-2.21326	-1.16619	2.19521	2.44645	-2.27925	-0.135293	0.144109	0.65156	-0.478312	-3.5336	-2.4728	0.142673	0.645421	3.52247	-2.29231
ENSG00000179152	-0.625593	-0.186538	0.0992658	-0.92012	1.38546	-1.0114	1.64055	2.04874	-0.13886	-1.66079	-3.41135	-1.73407	2.01309	0.931525	6.48353	0.0615612	-2.62051	-2.34334	-1.2519	-0.936979	-0.491931	1.43167	0.790963	-0.107949	-0.766577	-0.222933	-1.04441	-1.2981	-0.656646	0.589724	-0.717959	0.437765	1.46908
ENSG00000172987	0.0820118	0.187576	1.00537	0.923739	-2.76922	0.520419	-0.150892	4.58615	-0.00109294	0.0684995	4.19186	-1.8911	-0.0949612	4.20889	-0.808808	-1.25984	0.198136	-0.797542	1.72527	4.70687	5.99115	0.473845	0.664275	-0.0453103	0.737137	-0.165756	0.521496	3.35838	0.929791	1.47075	0.261505	2.52834	1.62524
ENSG00000137261	-0.410781	-0.34608	0.682943	1.02814	1.11226	-0.222684	0.0361192	1.44661	0.420493	-1.4602	-0.0150858	-0.803062	2.65985	1.69794	0.0555554	0.931398	-0.190709	0.093782	-1.13978	0.311249	-3.28076	-0.055712	3.95106	-0.72897	-0.510263	0.507803	1.04771	0.517342	-0.635521	-1.27861	0.29439	0.514286	0.25696
ENSG00000183160	-4.22059	-1.84469	0.243183	1.18634	-0.246779	-2.33243	-0.124831	-0.810179	-0.290422	-0.665576	0.444792	0.704016	0.0754205	-3.87633	2.32838	-0.196838	-4.74899	-0.475358	-0.165682	0.013049	0.277986	0.148497	0.766464	-1.0607	-0.862733	-0.10965	-1.71358	0.579448	-0.374106	1.05104	1.60344	-1.14098	-0.326438
ENSG00000164100	0.672398	1.31252	1.92761	1.26066	-3.22316	0.873528	-0.98169	0.329914	1.86976	0.749923	0.542327	0.181483	0.153924	0.271965	-0.613033	1.65286	1.63608	-0.638735	-2.60304	-0.529601	4.7344	-1.96202	0.543601	0.777631	1.90154	1.46094	1.10096	2.88745	-1.47288	1.19641	-0.451207	-2.05424	0.607666
ENSG00000198276	2.59978	1.85502	-0.546262	0.0548056	1.43866	0.178841	-0.376887	-0.372817	1.83444	0.485025	1.78298	0.724089	-0.165267	1.27259	-1.70242	-0.230591	-1.20665	-0.284882	0.702092	0.266851	-0.250512	1.66971	-3.88947	0.577739	0.291218	2.3508	-4.247	0.0160995	0.0680501	0.600757	-1.01717	0.0197909	1.56409
ENSG00000132849	-0.575056	0.396344	-0.133342	-0.319294	0.865207	0.351026	2.40002	-0.577	-1.18685	-1.72046	3.30309	1.92323	0.698834	1.01747	0.0916812	0.138969	0.718728	-4.18462	-1.66295	0.942266	-1.23133	-1.54879	1.32876	0.542157	-0.75389	-1.96154	-0.708763	2.04007	0.140993	0.294682	-1.56146	-2.391	-3.37343
ENSG00000103248	0.295347	-2.28127	-0.00513119	0.23203	0.965189	2.23039	0.832813	0.621187	0.172797	-1.11814	0.25618	-0.550281	-0.795499	2.33479	-0.271008	2.60347	0.275035	-1.32826	-4.31148	-0.266147	4.18592	-1.90412	0.659943	-2.10102	-2.71828	-1.32394	-2.66253	0.914206	-5.6629	-1.38499	2.11838	2.1474	-2.21073
ENSG00000169592	0.133718	1.54297	1.17441	-1.72637	-0.239324	2.40215	0.746739	2.47446	-0.226268	-0.0598302	0.0868823	0.588471	-0.259115	3.8652	0.35995	0.240175	5.66443	0.826077	1.26353	0.811934	-0.811127	3.53079	2.17416	0.931167	0.210311	1.98586	3.62133	1.08535	2.69642	-1.13171	0.35928	0.832365	-0.526394
ENSG00000141627	-3.83666	2.14736	1.36724	-0.437396	-2.79058	-0.640556	4.89746	-0.0919064	1.63956	0.666824	-0.823937	0.565102	0.759957	0.586249	-2.21901	-0.169137	-0.972442	3.16337	0.814972	0.885968	0.879207	-1.0885	1.89372	-0.656612	-0.365201	0.885235	0.774859	4.5647	1.33066	-0.474356	1.77079	-2.2742	0.488
ENSG00000144283	1.26071	-0.195197	1.64035	-0.194994	3.67227	-0.670228	-0.892842	-0.988523	1.06846	2.0971	1.15388	1.83949	2.23393	4.84985	1.81703	1.32448	1.23642	0.67282	0.120047	-0.218049	2.94659	-0.123348	0.964082	0.0437715	1.47355	0.977333	2.23785	3.72124	0.0161019	0.929752	-0.678583	0.553098	1.65415
ENSG00000171517	0.542755	0.20545	2.56795	1.22908	0.850821	0.344981	-0.604085	0.793501	1.52866	0.657719	0.815775	1.334	0.904817	-1.6895	-1.06318	0.693444	1.24565	1.00807	-0.344119	-0.782562	0.310355	-0.234489	-0.453276	-0.221416	0.600709	0.894974	0.637873	-0.068115	0.194119	1.03706	2.1107	6.0655	-0.97251
ENSG00000149929	-1.077	0.886422	0.220041	-0.612209	1.27006	0.976945	-1.81229	1.3102	3.34132	-1.73954	-3.33499	2.9921	2.05648	1.13313	0.119836	3.60184	2.78396	4.32836	1.98111	0.0745195	1.18816	2.74439	-2.19239	0.048495	0.240169	3.07677	-4.85203	1.43683	-2.35598	1.39535	4.2109	0.536911	1.81598
ENSG00000071282	1.03317	1.46874	-2.35601	1.57294	-0.69797	2.92468	4.17254	-0.770368	-0.330732	-2.08343	-4.34559	-0.675991	-1.48488	-1.92671	0.635543	-4.2706	-7.00258	-4.44587	3.89709	-0.858839	2.37428	2.01571	-0.653625	0.29014	-0.413283	-0.217706	0.328696	-5.84636	-1.93525	-3.59693	1.63875	-2.26464	-0.20548
ENSG00000121691	0.418927	0.274796	-1.69878	-1.68506	0.525159	1.96685	1.23325	1.61277	-0.68737	1.2434	1.65493	-1.09326	0.394155	-0.411308	-0.273683	-0.906429	0.362037	-1.4652	-3.14843	-3.60242	-3.67337	-0.270807	-0.536437	2.08408	2.59439	1.45634	1.95947	-2.67271	0.901429	4.47772	-0.452602	2.89203	-4.42057
ENSG00000101040	-3.58811	0.0430287	-1.70517	-1.49187	-0.598256	-0.651268	-0.81652	-0.425325	1.63441	1.26273	-0.455399	0.425302	1.12697	0.888981	0.269927	-1.62739	-1.99933	-2.21937	1.90945	1.08253	-0.926801	3.84017	-0.711553	-0.481477	0.252198	1.87664	0.280836	1.24343	-0.224498	1.30205	-1.8365	-0.905419	1.01036
ENSG00000152595	-0.960554	-1.10671	-3.71368	-1.84332	-1.0205	4.11762	0.466543	-3.72886	-0.580283	-0.640586	-0.0673153	0.0681164	0.231227	-0.0635388	-0.794683	-1.18798	-0.254443	-0.912786	-2.32599	0.550302	0.318273	-0.178152	0.0829851	1.87136	-1.14152	-2.84864	0.347002	0.00635141	0.15219	-0.26218	1.45268	1.81737	-2.36929
ENSG00000121005	-1.31255	1.73474	-0.991031	-3.54351	-1.97789	-0.765473	-0.737903	3.01487	-0.977923	-3.1873	-1.55782	1.1958	-0.230345	-1.02135	-2.91053	4.73109	2.56029	5.17096	-1.45932	0.676012	0.527892	-1.79684	0.640468	2.31044	1.47779	-2.39111	-1.46529	2.11633	2.53627	0.744098	0.362599	-0.447093	-1.35462
ENSG00000237412	0.281863	-1.33361	-3.98973	0.188909	-8.39298	4.14946	-3.07218	1.53474	-0.395746	-0.0684213	-0.0607913	0.538311	-1.03883	1.74701	1.73847	-1.09507	0.000151269	1.22468	-0.918067	-0.845768	-3.65676	0.219967	1.35493	-1.89399	5.98584	0.272927	0.0275824	-0.162723	0.0178633	-0.390018	-1.98888	-0.517992	-1.58674
ENSG00000164687	0.0512801	-2.18807	-1.21355	-1.2756	-0.909309	1.55518	-1.80764	3.23361	-2.2723	0.552365	0.008442	0.734778	0.370396	-2.91244	0.57726	-3.06804	-2.301	1.54048	-0.0915492	-0.31379	0.388258	1.44742	-0.754653	2.49456	1.58704	-1.03318	-0.801193	-5.54125	-1.85854	0.450696	2.48553	0.502028	-0.0825234
ENSG00000125827	-2.48119	2.04853	-0.00175613	1.09866	0.0822281	-2.3591	0.28437	-0.996481	0.334431	0.499662	0.207143	0.0333736	0.668752	0.999665	-0.340226	-1.66932	1.39826	0.954794	2.43906	0.331063	-1.64168	-0.500542	-0.239134	-0.373017	-0.0485857	0.206949	1.08325	1.68295	0.516429	-1.11605	-4.41734	-3.67122	-0.622274
ENSG00000013583	2.34928	2.27877	2.84752	2.17955	0.458182	3.71332	0.153545	0.386581	0.852184	0.44896	0.818199	0.530348	2.9021	1.55795	0.288959	0.620019	1.84022	1.47333	0.13947	-0.174599	-1.04638	-0.979478	-4.06158	0.418367	0.0787005	0.414212	0.540366	1.35059	1.42464	1.90758	-0.959202	4.15082	0.990209
ENSG00000067798	-2.43391	-0.985822	-2.06421	0.11945	-0.455164	-2.79191	0.225641	-0.711453	-2.30637	-3.9789	0.543385	2.16262	1.2491	-3.64255	3.69323	-0.776131	-0.248802	-0.879648	-1.28821	-0.408801	-3.85402	0.409336	1.7163	0.983061	0.506096	0.209352	-1.49123	0.233079	-0.0156296	0.538181	-0.947335	-0.549625	-3.10196
ENSG00000116745	4.74564	6.27889	1.41909	0.27843	2.5073	0.182997	0.173981	-0.70488	0.150576	0.666274	1.09434	0.097032	-1.19049	-0.284932	-1.70131	0.26011	1.07743	-2.0471	-0.1744	-1.80572	-1.51259	1.27464	-1.19219	-1.87612	-0.107492	6.43619	-8.22813	-0.735396	-0.423965	-0.994822	0.823564	1.81913	-6.62645
ENSG00000166946	-0.226887	0.122789	2.35714	-0.0619671	-1.93018	0.768578	2.10801	2.50389	3.23716	3.3323	1.68269	2.17488	0.741644	-0.284974	2.75256	1.03118	0.541425	0.286529	-1.61098	1.47947	2.39122	1.01214	-1.70139	0.0341687	0.179911	0.0796595	-1.03489	-0.678483	0.795965	0.227092	2.00812	0.644039	1.67719
ENSG00000000971	-1.08522	-0.703434	-3.56015	0.603716	-4.27889	-1.42402	0.536157	2.77826	-0.858065	-0.124019	1.10508	0.617915	-2.12587	0.0508368	0.20482	3.08524	-2.35734	-1.58951	-0.146652	-1.64535	-1.19616	0.60277	-1.34937	-1.52549	0.423788	-2.15289	-0.934788	-1.36104	0.140891	-0.239321	-0.709495	-0.809704	-0.535145
ENSG00000120925	1.69277	-2.71293	-2.34156	-2.39871	1.49817	2.14181	2.6167	-0.730762	4.1878	2.28449	2.64023	-0.576202	-0.458142	-0.987876	3.10433	1.1301	-0.68175	1.56035	2.12378	-0.646456	4.58856	0.711427	1.65549	0.647618	0.398242	0.92284	3.65608	1.25505	3.28942	-0.246616	-1.88016	-1.28676	-0.484349
ENSG00000165449	2.4295	-0.915123	-0.756721	2.73069	0.076402	1.21361	0.863665	-0.0313913	-1.67229	-1.79995	0.577151	0.722082	1.32217	-1.19993	0.656977	-0.0123145	-0.122542	-4.21798	0.166554	-0.359569	1.9059	5.05481	-1.51861	-0.644307	1.07975	-0.89188	0.0115943	2.01527	-0.900186	0.194434	0.338593	-0.566657	-0.11854
ENSG00000109323	0.985143	0.700308	-3.28817	-0.431599	-0.682916	-0.235963	-1.19429	-1.3034	0.0828451	0.241254	-1.78815	-0.924985	1.53578	0.0908584	-1.02653	-1.26002	-2.21693	0.0976414	-1.77691	-1.92466	-0.975413	-0.135225	0.614129	-1.04621	-0.867572	-0.348002	-1.03341	0.367633	-0.109541	-1.21132	-2.03614	0.231021	0.0881923
ENSG00000174827	-0.37209	-5.47146	-1.26938	-0.301516	-1.76688	-2.21083	0.587269	0.273649	-1.24346	0.0109486	1.49854	4.42059	-4.96168	-0.628279	1.21891	0.723334	0.565665	-0.846288	1.21327	-0.820232	1.05524	-0.22931	1.54414	-0.783095	-0.504705	-0.833515	-1.50081	1.16971	-0.574771	-0.379939	-0.964776	-1.19051	-0.57517
ENSG00000177000	1.75739	0.759234	1.24226	0.619449	2.62524	0.651613	2.56639	4.609	0.581367	0.780398	5.76238	0.700196	-0.325734	0.894038	0.399172	-0.951751	-0.264279	-1.28164	-1.03952	0.813637	-0.351757	1.05768	0.716984	2.1732	-0.106147	0.988955	-0.343336	0.189294	-1.16707	1.20866	-0.756282	0.110102	-0.278199
ENSG00000168172	3.48619	1.30694	2.37069	1.74747	0.202925	-0.426057	1.42168	0.224312	3.48686	1.8206	0.685001	0.653999	-0.772972	-2.67658	-0.810042	-0.592228	0.800442	4.51047	5.13781	0.93266	-2.53414	0.129917	-1.95705	0.83467	0.822562	-0.419496	0.501065	-0.684961	0.664473	1.37704	0.511827	0.351769	1.17116
ENSG00000254999	-2.02919	-3.64964	-0.610298	-0.499105	-0.314414	-2.61979	2.00453	-0.230632	2.515	-1.55176	0.659756	-3.72209	-0.0181988	-1.57982	1.53505	-0.256358	-2.12231	-0.971576	-0.0619402	1.27147	0.32786	1.02196	4.27332	0.47741	0.083785	1.64546	-0.353407	2.08513	-0.667424	0.147828	-0.187655	-0.421021	-0.345648
ENSG00000154447	0.763004	5.05674	-0.742675	1.54537	1.14101	-1.69028	2.09397	-0.536489	-1.63643	-0.75789	0.638133	-1.28172	4.32793	-0.978932	-1.4631	0.882915	1.30494	-0.831017	1.77905	-4.69882	0.850292	-0.891528	-0.494026	-1.90099	0.587643	0.130681	0.39953	2.92031	3.15334	-2.61139	-1.14875	0.977392	-0.228078
ENSG00000152669	-1.59984	-0.82944	-0.27304	-0.798526	-0.467904	1.21919	2.83381	4.91653	-2.44905	-1.61997	-1.96225	0.0535094	4.65727	-2.13284	-1.37784	-0.576806	2.17511	3.8338	-0.167881	1.20567	-1.58947	0.224462	-0.575766	0.394881	0.29608	0.452596	-0.124911	1.68461	2.31758	0.224949	-1.61812	1.76629	1.29331
ENSG00000012171	-0.557372	0.643827	0.129277	1.38806	0.498009	0.846698	1.07953	-3.34732	0.447012	-1.59035	0.264246	0.528868	0.184601	0.211118	-1.38916	0.373161	-0.254434	0.81885	-0.0333858	0.759454	-2.42697	3.00016	-0.44475	-0.827557	-1.96274	0.325512	0.803739	1.45164	-1.22604	0.395814	-0.105483	-0.486855	-0.48954
ENSG00000183831	-0.0522366	0.305169	-0.629163	2.67857	-1.74039	-0.73144	0.164328	-2.29795	-0.298598	-0.828302	-0.216059	-0.0123804	0.717686	0.117835	-1.03674	-1.76523	-0.208036	-3.52099	-0.473699	-0.776114	1.47407	3.4235	-0.314163	-1.87115	-0.650855	0.592886	-0.0968893	-1.49092	0.940397	0.739741	0.313251	0.0886449	-0.742395
ENSG00000160207	-0.0711339	-5.32088	2.66224	-1.75591	-6.06317	1.81825	-0.186524	-6.13627	0.897258	2.04602	0.0177244	-0.341122	0.0591274	-0.0713054	0.308377	-0.232802	0.390513	-0.438744	0.331199	0.761188	-2.32978	-0.928126	0.544053	-0.267629	-0.580061	0.0623813	-0.355597	0.788777	-0.502442	1.57253	-0.475993	-0.876382	-1.67684
ENSG00000175206	-0.749454	-0.0241804	-0.280846	-0.00889441	2.10933	-0.221159	0.0162589	-0.437412	-0.063363	-0.17243	1.45032	-0.0257268	2.52631	-0.222092	2.75042	-1.3224	0.0995208	1.61478	-2.87657	-0.771177	1.39481	-1.5608	0.174585	-0.00117862	3.50879	-1.07402	-0.461114	-0.678935	-2.97776	-2.10801	-0.0558651	-0.110241	0.266798
ENSG00000185049	-1.07407	-4.44761	3.28058	0.0331433	0.750671	-1.4001	0.445318	0.229534	0.812573	-1.86406	0.553989	0.390788	-1.52424	1.78904	1.98064	0.21584	2.74686	-0.938273	0.798987	-0.808631	-0.635823	-5.53462	-3.06829	0.972817	2.07567	0.0971252	-1.17762	0.785071	2.6659	-1.84573	-0.244686	1.02333	0.176252
ENSG00000134070	0.206083	1.31048	1.05303	0.511288	-0.807795	0.0527803	3.49427	-0.810546	0.431706	1.01583	-0.0487762	-0.799781	0.664354	0.947519	-0.243051	3.9575	0.618313	0.172861	0.0762703	-2.91899	6.2775	0.679408	-3.34843	2.1167	2.05165	-1.24051	-2.29116	-0.168495	2.71295	-2.90283	1.53561	2.50687	0.590025
ENSG00000085491	-0.298875	-4.40785	0.81907	-0.236402	-3.04904	-1.56829	1.14838	-1.51522	-1.74529	-0.883537	-1.73212	-0.126428	-2.50069	-0.984548	-3.62776	1.30402	-0.555089	1.62286	-0.967281	0.0894203	0.937688	-3.56558	0.900928	-1.82266	-0.456662	-2.1075	-2.31137	-3.71368	-0.512796	-0.245942	-0.809979	-1.67381	2.80357
ENSG00000110619	-4.93957	0.693132	0.613503	0.266159	-2.50767	2.82357	0.11215	-0.510055	2.90015	2.22388	0.85019	2.83778	0.629682	-0.587742	2.37838	0.0156397	-3.68763	-0.113804	6.23799	-2.79004	0.190724	-0.123818	-2.19873	-4.88231	-0.653358	0.582709	0.659486	-1.01134	-0.879212	-0.202502	-0.235675	-2.47265	1.13282
ENSG00000133393	0.878922	-1.76536	0.250422	1.35025	-0.238502	-1.13144	-3.53907	2.01607	-2.62756	-2.29272	-0.20247	-2.00738	-0.0527142	0.966386	-1.30687	1.32653	0.0730747	-1.93177	0.459911	1.45311	0.952049	-2.57751	0.561458	-2.3055	-0.819213	-1.53798	0.343043	0.0446358	-1.20921	2.13915	-0.773545	-1.05383	4.49484
ENSG00000116819	-2.41542	-6.19326	-0.66354	-4.21267	1.14635	0.347433	0.754725	1.09314	-0.31718	1.1517	3.58526	-0.62921	1.76038	3.16374	-5.0736	-0.907588	1.16487	-4.7569	1.21926	4.79147	-1.78514	-1.36288	3.23781	2.5333	5.15106	6.20867	-0.948451	-0.888436	-2.8518	0.969894	1.17096	4.09109	0.382496
ENSG00000100060	-1.24142	3.85117	-3.05282	0.926807	-1.57395	-1.59214	2.09818	-0.476812	-2.12507	-0.769853	-2.33399	-3.14477	-0.333818	-2.14738	0.64738	-5.37504	-1.63733	-1.22806	-2.05397	1.01368	1.30473	0.323414	-1.53196	-1.21555	-2.07201	-3.72205	2.26589	3.99818	-2.06369	-0.964482	-0.904288	-2.38383	0.426247
ENSG00000138670	0.483378	0.00938261	6.43484	0.890402	-0.603109	1.96205	2.24828	2.33787	4.71079	1.09699	2.82273	2.28634	2.57023	0.853651	2.92252	-0.360076	2.67927	0.147385	-0.619568	-1.09222	1.47623	0.235892	2.33281	0.650097	0.590925	1.51023	0.051307	1.34289	0.495664	-0.0291872	-2.94048	-1.84135	-0.454082
ENSG00000171824	3.46077	-2.29417	1.35624	-0.75229	0.682069	-0.550422	-0.208606	-0.67385	1.13186	1.23958	-0.633792	2.5926	-0.156026	-1.14122	-1.98912	1.15155	0.0588964	-1.47902	1.19309	0.228579	-1.9087	-1.18571	-1.61443	0.448372	0.265046	0.270623	0.323385	1.17948	4.00765	3.43068	0.840745	1.02277	0.38062
ENSG00000099840	0.930982	-0.191398	-3.4212	1.47103	-0.258953	-0.534263	-0.645958	-2.65638	0.62123	6.73285	1.7149	0.582882	0.665935	-1.11773	-0.514802	-0.794997	1.08662	1.53481	0.540339	1.54096	-1.77919	0.738897	-3.22937	1.06572	0.718461	1.22932	0.721674	3.12481	0.128818	-0.346965	-1.03769	0.191391	2.65702
ENSG00000170581	0.289091	3.25034	2.06542	5.75997	-1.89058	-0.290883	0.052936	-0.632242	2.06346	0.788505	4.65248	6.04912	2.07945	1.48975	0.863675	-2.2447	0.145962	0.936322	1.63493	1.7983	-0.613931	0.880512	2.7979	1.47126	2.52898	4.81082	-0.660522	1.19812	0.110789	-1.54965	-0.216457	0.197402	0.204569
ENSG00000115155	1.5851	0.887636	0.797625	1.50104	-0.301697	-1.24845	0.811957	0.265148	-2.45658	-2.83447	0.564	0.846916	1.01649	1.17199	2.67362	-1.85278	2.05802	0.391489	-1.32388	0.0436837	2.53184	-0.127673	1.68904	0.214611	0.702869	0.563274	0.0721722	0.634085	-0.522415	0.439582	0.1362	-0.635526	-0.140396
ENSG00000107105	-0.570901	1.97936	1.03309	-2.67289	0.0390315	2.74895	-0.0624284	2.05093	0.391109	3.99932	1.8351	1.78479	1.07195	0.63761	0.902983	-3.96853	-0.351449	-0.549164	2.07383	-1.08954	-0.111107	-1.43876	-2.5616	-0.412134	-0.190233	-0.0104263	1.39368	4.25443	-0.150246	1.12032	-0.259098	0.129379	-4.50933
ENSG00000139178	-0.515295	0.503746	-2.04979	-0.587647	1.7352	1.6251	-0.162537	-1.80147	-0.857037	0.542785	-2.25806	0.473888	0.994102	1.80602	0.701406	-0.920806	-1.6126	3.25155	1.14049	-0.627171	0.688622	0.653072	-0.626447	-0.956325	-0.0416288	0.41389	0.548842	-0.609501	4.2293	-0.00980786	-0.375652	-0.444165	-1.74364
ENSG00000116096	-1.74455	-2.27282	0.227605	0.551484	0.871989	-3.74025	2.25818	-0.763687	-0.263401	-0.132429	-3.35295	0.307916	-1.68251	-1.79212	3.88554	-1.43999	-0.648597	-2.16699	1.45231	1.33822	0.729969	0.2251	-1.21864	-0.162277	-0.436921	0.577235	0.812761	0.133616	0.40188	1.11959	-1.11814	0.0520986	1.28941
ENSG00000143373	-2.76496	-1.18177	-2.57781	-0.0445275	1.10885	0.800852	-0.0773419	1.03641	-1.37458	2.45252	-0.916628	-1.60817	-0.0176511	1.39826	-4.17614	0.480051	-1.5736	-1.05026	-0.0271297	1.17067	-1.9601	-1.44093	-3.88847	0.445679	0.285636	0.0376803	-0.994271	-0.804908	-2.72176	2.50882	0.68638	0.892413	1.83066
ENSG00000140553	3.88149	0.977685	-1.30606	-0.0628236	0.0830633	2.29686	-1.10648	-2.09686	0.643582	2.36328	1.55739	-1.17016	-1.98582	1.39858	-0.362592	0.955156	1.25985	3.66854	-1.41423	0.409254	0.331663	-2.29817	-0.539321	-0.102199	0.941365	2.28243	-1.44579	-0.244584	1.28391	1.24648	1.33923	0.36771	-0.14736
ENSG00000139291	1.59881	0.0659578	0.380378	0.0758125	-1.11332	-0.802466	-0.459611	-0.741641	-0.913166	2.96225	-1.56449	1.62645	0.606441	0.0580123	-1.8021	1.53217	0.161633	1.60287	-0.0755088	0.233255	-0.208845	0.681699	0.599259	2.56082	0.809496	0.357855	-0.205748	-0.585206	-0.475607	0.402709	0.544678	-0.697263	0.648035
ENSG00000151208	0.572965	0.453121	-0.512832	-3.21748	-1.56595	0.0192574	0.418272	1.04959	0.538122	0.382124	-0.239948	0.0687025	-0.104922	-0.0396251	-4.9496	-0.17187	-0.366859	1.03408	-3.1584	0.509528	-0.487388	-1.09545	4.33578	-2.96306	-2.17212	0.45485	1.02196	-1.47332	-0.145329	-0.267658	1.47191	1.11688	-2.74524
ENSG00000162976	-1.27642	-2.46306	0.0895286	0.422513	0.115669	-3.30123	-1.21158	0.00571674	0.422982	-2.34776	-0.969563	-0.200897	-0.673978	2.026	-0.185538	-1.64653	-1.64071	-0.961632	-2.41204	0.393682	1.62058	0.325791	-0.831954	-3.32439	-2.39432	-0.393503	-1.04025	0.0900227	-2.45931	2.06632	0.872252	1.90634	0.992064
ENSG00000133878	0.989138	-0.510985	-2.49877	-0.879499	-1.98869	-0.9761	0.713338	1.46754	-1.69227	-3.58756	1.98394	2.51724	1.88396	-1.23698	0.880281	-0.0500989	1.8935	-0.853943	0.0585498	0.757409	-1.15558	-0.17221	-1.29839	-0.298313	2.22055	5.20095	-0.872756	-1.22642	-2.95039	-3.00003	0.184113	-0.373272	1.18887
ENSG00000135048	-3.66172	-0.778888	-1.10078	0.125622	-0.395499	-0.853378	-0.859456	1.10939	-2.53934	-0.770565	-0.196181	0.386374	-1.0797	-1.91154	-0.127674	-0.449781	-0.794177	-0.31611	0.583378	-0.199911	0.368503	0.30662	-0.0712045	-1.12903	-1.32089	-0.378613	0.00649619	-3.80478	-0.0748953	0.764663	-0.16952	0.23517	0.588404
ENSG00000162104	-2.66126	-3.37538	1.66066	-3.23811	1.24152	-0.804907	-1.66747	-1.79109	-0.0296986	1.79343	-1.56947	-0.0135188	-0.715315	-2.41486	0.258906	-0.728223	1.10755	-1.4795	0.0329262	0.0332603	-0.145557	5.72534	0.0944195	0.405245	0.840408	-1.83562	-1.4761	2.29758	0.00651669	0.999365	0.3355	-0.631051	-0.294268
ENSG00000163331	2.24168	-0.390313	-0.656688	-1.98175	-0.176603	-0.41981	-0.896371	1.70509	2.58369	-0.12075	-0.610045	1.76201	-0.68739	0.0111347	-0.226808	-1.52921	0.720975	0.241654	0.874375	-0.223857	-1.83762	0.0354087	0.992429	-2.5672	-0.431807	0.205913	-0.329577	-0.727638	-0.990573	-5.09297	-0.227042	-0.514226	-2.29385
ENSG00000114302	-1.79679	-1.28955	-0.554853	-1.20758	0.777272	0.863949	1.69019	-0.779891	0.836622	-0.748086	0.0810094	1.36016	-1.15529	-0.588323	-1.64596	1.37152	0.336909	1.8081	0.194925	-3.94489	-0.43576	2.61378	-2.01159	1.23522	-1.11977	1.03192	-0.175224	-0.24008	-0.772761	1.40226	-2.48726	-4.72608	-3.5621
ENSG00000168906	3.27397	3.29346	0.449408	0.413107	-0.453714	-1.05722	3.90708	1.1754	0.840984	-1.30564	2.74138	0.926017	-1.30033	1.40271	-0.471912	1.00123	-3.32099	0.802862	-1.19197	3.72519	1.90006	1.7673	3.1989	-0.376216	-0.94866	0.0838361	0.393906	4.70895	-0.407816	-2.31715	-0.249307	-0.42501	1.19776
ENSG00000130226	-1.52713	-0.649616	-3.01316	-1.6642	1.89898	0.209325	-2.77843	1.35776	2.24388	-1.85125	-1.17258	0.0261695	-0.883336	0.535811	-0.588525	-1.55753	-0.814459	-4.99356	0.900222	0.733033	0.551344	-3.5777	-0.0886116	-0.874514	1.95467	-1.66339	-0.72047	1.49024	0.559682	1.89491	0.00447824	-0.0613937	-2.31081
ENSG00000111300	-1.40638	2.363	-3.92125	-2.40825	0.450484	1.83082	-0.642976	-1.44937	-2.8065	-2.23346	0.470664	-2.14785	-0.790747	-1.04603	0.687746	-0.800163	-1.00838	1.23123	-0.707427	0.988855	2.11219	-0.587633	0.86207	-1.40139	-1.90696	-1.81578	-1.12494	-0.175105	1.47364	1.98331	-0.83701	1.51518	-2.53078
ENSG00000132321	-0.55745	-1.68804	0.352113	-1.53348	-4.15289	-1.49463	-0.0936913	0.132196	0.918127	3.94893	-0.864921	-0.794991	2.28071	-1.79003	-2.49726	0.319847	-1.08668	-2.66178	-4.21813	0.331324	1.31865	0.74115	-2.19087	2.21315	2.32508	0.615997	0.66936	4.60538	-1.31069	0.293168	1.22311	-0.913214	-0.869597
ENSG00000100350	1.00424	0.0640454	-0.471456	-2.04621	-0.114535	0.928532	0.103963	1.32462	0.0281131	-0.471214	1.61301	-0.129748	0.239807	1.59032	-0.490631	2.50793	0.508334	0.469563	2.53792	1.94604	-2.19492	1.40147	-0.758317	0.781763	0.421805	0.36097	-0.417518	0.438538	-0.373043	1.45756	0.0136564	-1.4148	-2.0047
ENSG00000166965	-2.91645	-1.69678	-1.02437	-0.755693	2.24262	2.85263	1.24693	1.16264	0.133476	2.90171	-2.05426	0.644576	0.833932	3.65104	-4.90543	-0.00584118	2.89381	-4.09164	-0.290097	-4.18472	-0.837374	1.53941	-1.93641	-0.320586	-0.229789	-0.173142	-0.496458	0.376834	-0.901265	0.413939	0.465969	0.743719	-0.548773
ENSG00000185418	-0.511014	-3.94596	1.68109	0.505093	-0.0896557	0.7126	-0.425485	1.66	-1.58483	1.15073	-1.18142	-1.05019	-2.77647	-3.01863	1.25882	0.177528	-1.05889	-2.2019	2.92667	0.791173	-1.54842	-2.68683	-0.576515	1.61181	-1.26142	-4.72558	-1.62168	0.00454078	-1.0058	-1.38893	-0.261293	-4.64758	0.934435
ENSG00000236609	-2.14225	0.384617	-0.633325	0.467467	0.994017	0.291258	-0.0577519	1.50068	-0.781277	0.337348	-1.49968	-0.103336	0.762206	-0.0817088	0.411208	-0.214127	-0.29334	-1.47127	-3.78053	0.657291	1.29533	-3.62667	2.42438	-0.689363	0.79706	-0.842555	0.437168	3.29177	4.13466	-0.0575306	-0.39249	-0.36563	-1.65921
ENSG00000161888	0.612748	0.263892	-0.547831	-0.262823	-0.774264	-0.780927	0.528166	0.862603	-0.0585637	1.72132	-0.460464	-0.676094	0.0475127	-0.350348	-0.145149	-2.55302	0.877102	1.37709	0.178191	-4.33684	-0.27444	0.055095	-0.787199	1.06151	-0.325692	-0.0793957	-0.626896	0.404599	4.11049	-0.469698	-0.392323	-1.79207	0.372141
ENSG00000130164	-0.533268	-1.85201	1.41418	-3.40702	-1.52146	-0.314005	-2.80915	0.719271	-0.0236905	-0.237551	1.19313	0.190354	2.1108	-1.1112	1.09742	-3.22872	1.97356	0.347314	0.0716003	1.25843	0.538718	-0.616532	3.168	0.518012	-0.0244466	-0.482392	-0.719888	4.18914	-0.0083771	3.09693	2.09023	0.842444	1.39441
ENSG00000155980	2.02621	0.44696	0.3417	1.26848	-0.967042	0.28117	-0.356348	0.1909	-1.25873	0.20039	1.99801	0.530666	0.348337	3.1826	1.27647	3.53668	0.677446	1.39722	-0.45365	-0.455344	-1.42569	3.74158	-0.37325	0.750949	-0.108907	-0.334031	-0.172114	1.63262	0.671536	-0.173222	0.0800785	-1.17068	-0.389931
ENSG00000159256	0.0626862	0.362713	1.45718	0.40643	4.04753	0.0769671	-1.10816	1.21877	-0.8921	-0.681726	-1.663	-0.0341744	1.00616	1.95694	0.698719	-0.452641	0.221598	0.575671	0.0275672	-1.32313	3.7826	0.481287	0.204499	1.0266	1.90062	0.726264	0.395078	0.610849	0.616124	0.223848	0.256257	1.61836	-0.503717
ENSG00000053524	0.374531	0.43606	0.240682	0.256807	-0.545145	0.586327	-1.00937	-0.50553	0.0422255	-0.0656179	-0.611342	-1.99437	0.611207	1.29784	0.319165	1.66571	1.77798	0.296182	0.726435	0.0291573	-0.562948	1.14395	0.491227	-0.444437	-0.782335	0.175014	-0.417082	0.880852	-0.42177	0.0893505	-0.477906	0.528539	0.121204
ENSG00000103197	-0.594534	6.50906	3.22798	-0.565376	-1.26385	0.553789	-1.37109	-2.89526	-0.106514	0.780772	-0.065534	-4.93941	-0.792934	4.46854	-5.28557	-0.796534	-1.20944	1.47221	-1.34207	-0.873799	0.136217	-0.788482	-1.06751	0.777107	0.556212	-1.14814	-0.749201	-1.54966	-2.25814	1.22503	0.565879	0.836144	-1.59168
ENSG00000137038	-0.197751	0.938913	0.0178018	-0.475261	-0.128017	0.348704	3.51042	2.27206	0.855414	0.324275	-0.578425	0.32021	-1.88672	-2.26941	-1.68332	0.52269	-0.82699	-0.554937	-0.621103	-1.34603	2.35853	-0.100733	-1.20434	0.437515	0.204668	0.983756	0.178405	1.95692	-1.5297	7.30892	1.30072	-0.325867	-1.47479
ENSG00000115718	-0.630076	2.2955	0.669263	-0.13348	0.506675	1.872	1.04466	0.992151	-6.13727	0.632363	1.21056	-1.79076	0.567297	-0.579441	-4.20631	0.930256	-1.45851	0.185185	-0.695332	0.117708	-0.490402	-2.63698	-0.718305	0.315086	1.29247	2.15029	0.218708	1.36669	1.04934	-1.46825	2.40267	0.615507	-2.26018
ENSG00000185272	-5.76781	1.59565	1.12613	0.0537771	0.459222	-1.03307	-3.66173	-3.47068	-0.15508	1.48607	0.359304	4.70734	-0.124427	-0.163521	1.18221	-2.53925	-1.18894	1.13807	0.572124	1.03298	3.91459	1.67497	0.037156	2.62086	1.82363	0.978026	0.579993	0.668612	-1.52217	-2.13742	3.52655	-2.14327	2.01145
ENSG00000102445	-0.371875	-0.533871	0.490355	0.533187	0.476497	1.2279	-1.50315	1.55796	-1.46965	-0.0341547	-0.307065	-0.471316	0.0334992	-0.794185	-0.149223	1.36206	0.0768724	-1.90744	1.07548	0.868559	-0.0607862	-0.498724	-1.13498	0.312556	0.239429	-0.0335021	-0.125047	-1.63008	-1.05584	-2.16448	-0.497416	-0.915031	-1.8979
ENSG00000119787	5.31945	1.01395	-4.51469	-1.07063	0.0783897	1.91428	-2.16838	-0.50526	2.905	2.53372	-1.44258	2.96512	1.24841	-0.459393	0.356199	2.37484	-0.0220853	2.90821	-0.751759	0.382652	1.48712	0.603728	0.731745	-0.826382	-2.49171	0.172361	-0.928337	1.67957	-0.97918	0.754009	1.26194	1.31718	0.328988
ENSG00000056972	0.761153	1.00857	-2.83794	-2.77445	0.871538	0.888062	1.58304	4.15358	1.14999	0.918532	0.119647	1.02909	-2.89188	-5.00104	0.472227	-0.931797	-1.48531	3.7121	-0.311063	0.595123	0.487732	2.91132	-0.128918	1.06427	2.48374	1.47983	-0.225013	0.346909	0.401388	0.364159	2.30699	-2.84749	-1.62339
ENSG00000166454	-2.25497	-1.95399	-0.525094	-0.555339	2.20192	-0.0427326	-0.688483	-0.264302	1.30237	-1.15797	1.28399	1.13063	1.88096	-2.5614	2.27126	-0.316478	2.56067	0.874548	-0.52531	4.83322	1.51371	0.313572	-1.0893	-3.01871	-2.24784	-3.47832	-1.53776	1.62242	1.38082	-4.06327	1.32261	-0.1475	-0.517147
ENSG00000139514	-0.658385	-0.447792	4.28246	-0.927194	-5.18287	2.09977	-0.00168599	2.99151	0.149031	0.033171	0.381188	1.52215	0.878383	-3.54905	-1.83767	0.748093	-0.490021	-0.802559	-0.716818	-1.55589	-0.642486	1.58633	-1.23855	2.54242	-4.06849	-0.294503	-0.935166	0.40216	0.566338	-0.785767	0.127359	-0.395544	0.688792
ENSG00000117748	0.993541	0.633409	0.48543	-0.180805	-0.416334	-0.224455	0.848166	2.97508	-1.9654	1.72991	1.84575	1.48099	4.89851	0.0622265	2.45995	2.33059	1.07295	4.77667	1.05545	0.780179	-0.215663	-1.98432	-0.770416	2.79709	1.3526	1.81221	0.828052	-0.00838096	0.82704	0.511754	2.80339	-1.28183	-3.89977
ENSG00000103121	-1.59369	-0.841673	-5.03047	-0.861161	0.708111	2.5153	1.4173	3.73085	1.25428	1.37411	1.28694	2.34055	-0.653252	-2.73493	-2.31869	-2.38414	1.15459	-0.370027	-4.69075	-1.86487	1.22846	2.74508	0.0262172	-0.74209	-0.742257	-0.201093	-1.6745	2.05841	1.48782	0.611367	1.36072	-0.348022	-3.42591
ENSG00000180660	-1.92725	-1.7904	-0.596661	-0.412852	0.0610419	-0.230672	0.101333	0.830807	2.67566	1.6696	2.76333	0.61742	-0.781832	-0.503415	-4.67055	0.191712	-0.548097	-2.22347	-0.988446	-2.86359	1.7401	0.87501	-0.584895	-0.869701	0.834766	0.619755	-1.15101	3.49606	-2.2299	0.0389456	1.20467	0.402599	-0.55035
ENSG00000019485	2.14761	-3.01992	-0.802916	0.8625	0.316012	-5.48906	-0.710455	-0.167951	-0.135031	-0.337851	-0.538791	-2.46561	-2.06819	-0.749555	-0.44684	-2.12878	-0.50419	3.54424	0.880432	-0.545422	1.45313	1.78775	-0.614091	4.48908	0.392986	1.29724	1.60672	1.65938	1.39166	-0.505629	0.939547	0.0769527	0.841585
ENSG00000055732	0.237062	0.585344	-0.0591251	-0.874506	0.245921	1.09986	1.24635	2.8935	-1.60262	-1.46382	1.41671	1.21212	0.209817	0.642235	0.688801	0.297852	-0.0290103	-0.0397932	-0.322128	1.54774	0.550004	1.02905	-0.192886	-0.0666404	0.29728	0.13839	-0.0687875	0.529952	1.04334	-0.000389859	0.543184	0.163702	-0.542603
ENSG00000074410	1.89871	-0.430381	-0.900295	2.61939	2.59684	-0.534218	-1.31758	-0.937492	-1.52726	-1.22211	0.2498	1.22621	-0.334762	-1.60331	0.902983	2.19764	-0.784537	2.36038	-0.490833	-1.75511	1.96568	0.0129702	7.76875	0.303505	0.231458	-0.204929	1.27853	-1.47688	0.321278	2.4885	-0.0729599	0.154793	-0.483453
ENSG00000069431	-1.09489	1.32564	2.05669	-0.106161	1.26382	-0.0359199	-0.758587	-0.378885	1.54553	3.07169	-0.404715	1.33529	2.89025	-0.0409122	1.99065	0.753832	3.06493	0.728145	-0.201839	0.435966	-0.548425	-1.28657	1.51583	0.141028	1.04424	1.78622	-3.13476	-0.0439602	-4.71629	0.947744	2.52028	0.324921	-1.72479
ENSG00000156140	-0.01326	0.149973	0.704004	-4.29172	-2.3073	0.336797	-2.61063	0.957434	2.64483	0.630306	0.334051	0.64218	-2.99329	-0.0821646	5.15688	-0.525683	2.99843	-4.72722	0.75899	-1.46608	0.682947	1.05083	2.81651	-0.422729	-0.181592	0.469734	0.0739165	0.725158	1.86984	0.505691	1.867	1.89817	-0.847242
ENSG00000101198	-1.54975	-2.46949	-3.73876	1.98356	-3.32549	-1.47538	-2.03776	-1.64091	-2.14487	-3.0895	0.31677	-2.10889	-0.979451	0.483244	1.58711	0.883663	-4.24303	0.115659	-2.73905	-0.486571	-0.467231	-1.87722	-1.49569	-3.0018	-1.98558	-1.47056	-1.00912	-0.268931	-2.35191	-2.91307	0.716667	-1.46806	-2.86105
ENSG00000135245	-0.604829	-1.3202	0.0103248	-2.08271	-0.519755	-0.393808	-0.207573	-5.90792	-2.97623	-2.41101	0.234965	0.365084	4.10162	0.884191	1.55456	0.835466	0.249938	-0.443461	-0.419538	1.14757	-2.24223	-0.817319	-2.04978	1.49927	1.58329	-0.0877715	-0.237379	0.59369	-0.271238	0.414009	0.803543	-0.491019	3.26056
ENSG00000136205	-0.000853401	1.41273	0.986954	0.174806	-0.333636	-0.316054	0.20398	-0.952653	2.19302	0.570267	2.1697	0.465755	-0.24954	-0.234007	0.316038	0.387038	-0.295189	-3.18583	0.208389	1.19918	0.845528	1.1933	-1.46242	-0.129041	0.193371	0.656546	-0.300642	4.10401	-0.502197	0.793261	-0.169864	1.84084	-2.27721
ENSG00000135541	-3.32403	0.156754	-1.04287	-2.17753	-1.04072	5.22907	1.27772	-0.968551	0.0415447	-1.15475	-0.618752	-2.00818	0.495837	3.36283	0.361413	-1.71882	1.5384	1.02778	1.44857	2.80567	-1.02305	1.77083	-0.717416	0.194838	0.0338737	0.48283	0.194726	-1.38158	0.996134	1.00605	1.44511	0.539269	2.34253
ENSG00000136383	-1.66402	-0.554382	-0.470928	0.462992	-0.133859	-1.70586	-4.59742	-0.429991	-0.525041	-0.17179	0.495011	-2.65233	-0.728313	-0.0405558	-1.41788	-2.20872	-1.07747	-0.202255	-0.300696	-0.676818	-3.90957	-7.37007	-1.40977	-0.100928	-0.179292	-0.19907	-0.863663	-0.447281	-0.910558	0.535681	0.116461	-2.91871	-2.75004
ENSG00000067113	-1.05008	-0.0110696	0.583019	-0.153902	-3.17106	2.47811	0.0757827	0.873476	0.721475	-0.158925	0.116677	-1.12768	0.661753	-0.241988	-4.01248	0.980357	1.26227	-0.040395	0.647334	-0.651931	-1.66698	2.28518	0.323405	-1.01062	-3.53037	-0.860664	0.31158	0.884772	5.19967	0.664244	-0.271795	0.468415	-0.348452
ENSG00000143578	-1.93155	0.612137	-0.786767	0.563802	0.352469	1.31306	-0.620073	1.48198	2.00699	-1.69729	-0.438771	1.32674	1.65659	1.63214	0.0503407	-1.58433	1.08329	-0.249252	4.66929	0.332614	0.4308	0.346791	2.18467	-0.0357718	-0.155571	1.31248	-1.16111	1.2707	2.40788	0.452896	1.71085	0.87504	1.27974
ENSG00000163902	0.000294825	1.08977	0.655806	0.726878	3.46463	2.86572	-0.271588	-3.45114	-4.26997	-0.834482	0.960704	-0.0435541	1.09763	-0.473738	0.0868401	1.11835	2.36732	-0.723659	0.727601	0.918329	0.784418	1.34503	3.89627	0.652011	1.00096	2.01468	-0.241301	1.27404	2.97215	0.890772	-0.607838	-0.00557496	-0.182344
ENSG00000260456	0.0237268	0.472283	-0.227274	-2.72542	-0.632308	1.11192	0.94382	2.2705	0.355587	-1.40453	-0.623349	0.922604	-2.30071	-1.37222	1.14692	0.0695314	0.89192	0.248387	0.421403	0.45213	0.57953	0.0164848	-2.09736	1.5599	0.518675	0.750517	0.385601	5.0001	-0.107183	-0.262603	0.155592	-0.393336	-1.01752
ENSG00000171208	0.151664	2.05634	-0.211643	0.57478	-1.38283	1.08434	-2.00606	3.0162	1.51063	-0.802736	-1.61558	1.13644	1.41883	0.173061	2.52124	-1.28926	4.78557	0.485441	4.48261	-0.0789513	-0.596057	-0.951464	-0.379563	8.16042	-1.94181	3.64717	-1.11353	1.4434	-2.72032	-0.0624329	-1.52723	1.12847	-0.204716
ENSG00000117602	-2.64095	0.873871	0.0308929	-0.752958	-0.161489	0.802586	-1.81536	-4.00275	-0.303766	-1.08059	-2.08875	-1.46185	-1.11712	-5.45626	-1.24673	-3.92155	-0.595165	-0.234276	0.574529	3.68254	0.667678	0.995541	-0.834844	0.388825	-0.0877569	-0.182956	4.68042	-2.61305	-3.33448	0.123702	0.839966	-3.3956	-1.09066
ENSG00000019505	3.04119	1.90699	-0.269812	-0.546158	0.640247	0.941921	2.8233	3.09136	0.824436	-0.537064	1.48733	1.15886	0.193291	2.74018	2.13212	-0.226691	1.13387	0.581108	0.391711	-0.314601	-0.529862	-3.86165	-1.24988	-0.0446273	-0.998631	0.43555	2.30977	4.4541	-0.784386	2.64156	1.70979	1.83209	-0.57573
ENSG00000187135	-2.46518	2.54035	2.11062	-0.715232	1.75988	-0.919332	0.308634	-1.18281	-0.0124279	0.544012	4.78589	1.23586	1.21596	-1.24296	0.604437	2.28151	-0.663116	0.339803	1.60424	0.321126	1.01707	0.254293	-1.76492	3.39986	1.38586	2.77179	2.08457	-1.04636	-3.42752	-1.1994	1.25771	-2.80646	0.640225
ENSG00000214706	0.198766	0.266727	-0.988909	-1.61103	-1.72293	0.631016	0.326627	1.14974	0.695416	0.2329	0.556474	-1.55099	-0.60412	0.88223	-2.35329	-0.418498	1.83162	-0.241863	-0.113912	1.68565	4.51101	-0.183742	-0.391966	-1.20363	-0.886803	0.156166	2.97512	1.85666	-1.09085	4.28871	-4.69881	-1.00161	-1.7312
ENSG00000139168	-2.59235	-0.953271	4.91843	-0.857808	-1.55114	-0.867918	-1.33741	-0.187012	0.0662455	2.44996	-0.115896	3.03648	0.830661	-5.26143	1.31754	-0.510697	-0.753883	1.1627	1.9503	1.75512	3.36015	5.05454	-0.555347	0.317241	0.0169362	2.9902	-2.11062	2.54011	-1.34758	1.5918	3.54826	0.908495	1.03874
ENSG00000164114	-2.84014	1.96977	2.48489	-6.51367	-1.64823	0.384454	-0.849251	-0.969379	2.58667	1.79971	1.33003	4.06457	-2.74115	-2.826	0.556779	0.994473	-0.405956	2.66046	2.30259	5.06132	-1.11276	-0.0104583	0.969633	1.17994	-0.0697534	-0.145338	3.61325	1.63425	0.213492	0.503738	0.975678	-0.603606	2.74924
ENSG00000168386	1.66973	4.45521	2.52635	6.47267	2.32724	2.18993	-2.3673	3.31594	3.73679	2.98489	2.94297	-0.977	0.218038	0.436001	0.750408	0.788507	2.7731	1.94336	-1.25489	-0.219993	2.38966	-3.4198	2.19883	2.02704	2.12239	1.64921	0.0300166	0.945512	0.344546	0.442956	0.759614	4.27041	7.6248
ENSG00000198646	1.72549	5.35591	-0.569397	-0.839994	2.49467	0.803196	-1.44198	-5.05124	-6.00965	-0.259056	1.87418	0.391308	0.65562	-2.9408	-0.297738	5.41611	0.416501	-0.525247	-0.295664	5.51927	-1.78762	0.619295	-0.416929	-0.181015	0.0577556	1.00716	-1.96642	-0.380514	0.699967	-0.303381	-0.613049	0.623625	0.354862
ENSG00000250305	-1.56257	-4.39208	-2.93084	-1.25734	1.95039	-2.86742	-0.476405	1.20835	-0.401445	-1.83829	2.57996	-1.11892	-0.631011	-0.589696	0.476217	0.641171	0.591428	-0.521769	2.02256	3.04989	2.26434	-0.698548	1.13555	-0.440237	-0.35594	-1.14053	-0.557879	2.74827	-0.160367	1.12117	0.527722	-0.108978	-0.224811
ENSG00000178821	1.02436	-0.753939	0.239706	-0.0215059	3.24433	0.25334	1.25364	4.4425	1.38656	2.52345	-1.76395	-3.11496	2.70734	0.0581207	0.642631	-0.0838252	1.47141	1.63387	-0.341659	0.250328	-2.13565	2.91616	-1.77873	-0.212054	-0.305424	0.197533	0.109665	0.219684	-1.08986	-1.09821	1.09343	-0.75926	2.72556
ENSG00000184220	0.609184	1.68604	1.09491	1.86324	-1.16115	-1.92381	-5.51365	1.65429	1.46406	1.42789	3.16901	-2.49901	-1.18229	-1.50622	-0.0894414	-1.01845	1.27095	-3.63888	0.0384127	3.06828	-0.0423951	0.436821	-0.569996	5.06502	-0.647239	1.26757	2.93884	1.70064	-1.09613	2.43515	-1.75237	0.406261	2.5876
ENSG00000182836	0.407555	2.68462	2.90551	1.02749	-1.2963	0.192712	1.43541	3.99772	0.824765	2.24703	0.607947	-1.81508	0.664055	-0.383991	0.978994	-0.9941	1.16363	-0.75808	2.45898	-1.83088	-2.26537	1.08024	-1.16478	-2.97766	-0.708715	1.7554	1.81943	3.98681	1.70036	0.331916	0.157675	0.477928	2.17583
ENSG00000215440	-1.35484	-0.744042	5.04229	0.181295	3.85804	-0.205833	-0.619738	0.334095	-1.17919	-1.66881	1.34267	-2.002	-0.594936	0.421881	-0.590678	0.394117	-3.76669	0.200927	-0.614213	-0.00603739	2.1066	1.64225	4.24818	0.677277	1.80173	0.520563	-0.241346	-0.855799	2.50054	-1.20035	0.268282	2.06444	0.790675
ENSG00000067715	0.560729	3.00624	5.77503	-1.39141	2.08736	0.970589	4.1709	6.17945	1.89419	1.44688	0.831086	1.37356	2.36431	1.08453	3.63849	0.607408	0.306164	2.44499	0.297423	-1.55438	-5.86628	1.89698	0.483927	0.188705	-0.284771	1.10237	-1.98229	3.8001	0.157701	0.212954	0.782445	3.28058	1.50446
ENSG00000171956	-0.378164	-0.574975	1.17692	-0.559871	-1.29878	5.13189	2.47822	2.3512	1.12844	0.837686	3.01409	-5.73229	2.30924	-0.661516	5.64391	-1.20078	1.3761	2.44412	-0.318941	3.01106	-2.00461	-2.59462	1.21061	-0.182628	-3.56843	-1.09472	1.27619	0.0990137	0.347571	0.56115	-0.151022	1.79649	-2.46316
ENSG00000174326	-2.20304	-1.39449	-2.64226	0.330595	0.847289	4.29872	0.263796	2.44671	-6.05008	0.254881	-4.38677	-2.00223	0.692743	-1.96297	-0.194904	0.259083	1.86976	1.02865	0.0353858	-4.33265	0.353276	1.10386	1.10308	0.557598	-0.497025	1.16724	-1.50116	1.17419	3.10134	-2.34672	-0.743165	1.75932	1.31622
ENSG00000186648	-1.0928	-5.25179	1.0716	0.430693	0.335912	0.329456	-0.653796	0.565167	1.26092	-4.47814	-0.215445	0.296931	-2.35145	-0.219969	-4.58927	1.0336	2.22106	0.202653	0.762907	-0.258341	0.476009	0.00205347	0.238892	-0.460471	0.802966	0.677183	-0.849888	1.88149	1.24509	2.60837	-0.054879	0.0889223	0.616616
ENSG00000105137	1.25024	-0.727207	-1.16424	-1.7977	-1.03424	0.0430878	-0.764987	0.583671	-0.730763	0.0974716	-0.449929	-0.148861	3.39802	-1.03936	1.97961	-0.682358	0.210285	0.329885	0.47723	-0.658288	4.27235	-0.51308	1.06942	1.2758	1.05415	-1.69685	-2.40658	-0.686458	-0.0260044	3.0522	0.409053	-0.171389	0.360512
ENSG00000122042	0.372362	1.66512	-0.606125	-0.58966	-1.76001	-0.245121	-1.28084	-1.30176	0.579748	1.45154	5.02679	2.35224	0.443111	-0.250276	0.175176	-0.706124	1.00446	3.3398	-3.35654	1.05541	0.346323	-0.975636	0.398756	-3.67041	-3.10103	1.20794	-0.716042	-1.04288	1.10992	0.371758	1.77404	-0.139687	-0.98272
ENSG00000166949	-3.28281	-1.85527	1.67822	0.747891	-0.602167	2.99808	-0.643807	0.0305221	-2.0109	1.04281	1.3364	1.25827	0.178767	0.480727	-0.901342	-0.294328	-0.664406	0.564926	-0.0826452	-0.889959	-4.34358	0.463198	-0.160842	-0.0194867	0.312282	0.75558	-0.481462	0.123356	0.516246	-0.879378	-0.189493	0.187278	-0.403994
ENSG00000174749	-0.912497	1.3987	0.220719	-3.3416	0.262376	-0.529475	0.242179	0.0181376	3.64302	6.37989	0.0724297	-0.969855	0.667021	-0.0601513	-0.995984	-0.763739	-5.01928	1.08799	-2.80121	2.38248	-2.97492	0.354867	-3.59651	0.881418	0.170231	-0.300182	-0.553665	-0.400254	-0.120558	-1.28203	0.946823	0.242327	0.343844
ENSG00000147437	-0.816626	-0.698023	0.308051	6.09412	1.05716	-1.11157	-0.768026	-2.82142	0.560548	2.16598	-0.589791	-3.70916	1.76951	-0.265823	-0.0921584	-1.10104	-0.174312	-0.398291	0.627385	0.10199	1.97782	-0.281584	-2.24953	-0.670305	0.121243	1.67017	0.263496	0.428577	-0.118687	-0.944844	-4.31609	-0.821895	-2.63061
ENSG00000162636	-2.59808	0.46004	-3.15406	-2.86645	-5.78353	0.603086	-1.06693	0.356714	0.913433	2.91426	2.69012	0.431181	-1.40467	3.32236	0.804484	-0.377189	-1.67932	1.50774	-3.41547	-0.677986	-1.73395	1.16432	-1.02286	1.0246	1.35088	-1.3651	-6.59534	2.0946	-0.946206	-0.133747	-0.11888	2.43896	-1.11515
ENSG00000135636	-2.04568	0.514767	-0.982416	0.683284	-0.211249	-2.19981	1.83119	1.21411	2.70196	3.54807	-0.938575	0.563945	0.256955	0.126713	-0.437405	2.16257	1.47316	0.090611	0.288906	4.18837	0.576392	1.41231	1.92743	-0.477108	-0.237899	0.656251	-1.18437	-1.61971	1.96497	1.922	0.490366	1.8492	1.58612
ENSG00000163520	-0.745347	-2.09193	0.115431	-0.793463	-0.851324	-1.15297	0.616658	-1.9541	-3.12918	-0.781348	-3.93678	-1.99334	-2.00344	-0.721415	-0.833077	-0.835971	-3.94227	2.04708	-0.0631051	-2.37228	-1.19817	-0.198188	-3.54815	1.78763	0.200214	1.71017	-0.796769	-1.3582	-7.16298	-4.85128	2.35445	5.37376	3.5671
ENSG00000185736	3.3547	1.13414	0.329344	0.565915	0.764713	-0.398397	-0.229123	0.930986	-1.93301	-4.36302	0.688179	0.664199	0.927102	-0.0803913	-4.02822	2.14646	-0.53878	1.04853	0.982911	0.398308	-1.03365	1.7364	-0.0455907	0.0979341	-0.133409	0.0499463	-1.36226	0.804568	-0.537666	-5.83336	0.388433	0.593656	-0.00322778
ENSG00000182871	-2.82615	0.29508	-2.18682	-3.77599	-1.63121	-0.214691	-0.00394455	-0.966372	-0.600948	-0.0356986	2.60974	-0.0402292	-4.00293	-0.680428	-1.0089	-1.35194	-0.917925	0.420913	2.86825	-2.46285	0.594247	-0.568412	-1.4899	0.707832	-1.07123	2.56042	-1.54031	-0.105276	0.255506	-3.18853	-1.64182	-0.558786	-3.73886
ENSG00000078618	-0.936721	2.84963	-0.350832	-0.294379	0.275219	-0.926357	3.73674	1.55957	-0.750454	1.84676	2.57884	0.414231	0.332876	0.0897832	3.25984	-0.607991	-1.71034	-2.49768	3.3366	-2.07345	-0.19075	-0.0143571	1.07252	0.694831	0.744223	0.900652	-1.02118	4.86094	3.91825	-2.79714	4.44721	2.57776	3.93043
ENSG00000066557	0.519315	1.26131	3.8868	-1.06498	0.867508	0.610245	4.32818	0.277786	0.148209	1.61443	-0.827601	-1.38339	1.33895	0.915267	-0.141908	-2.01261	-1.30533	4.25929	0.499091	-0.79309	-1.33691	3.03615	-2.52963	0.825268	-4.86124	-1.94273	-1.54878	-1.44891	2.23568	-2.27672	-0.647021	-0.539775	-0.0398681
ENSG00000004468	4.89599	5.35825	4.95539	1.93898	0.779009	1.93904	0.0157149	0.69784	0.481665	0.881417	0.842513	0.552295	0.413462	-2.54883	-0.0183596	-0.0949337	1.90568	0.430317	-0.534976	-2.03102	-4.85799	7.88146	0.89152	4.39909	1.45776	1.18006	1.68462	0.668947	1.42941	1.53151	-0.807762	3.67835	-0.801288
ENSG00000128610	0.885236	1.16292	-0.741691	-0.10182	2.30648	0.890887	2.28562	-0.230647	0.52101	-0.946702	-3.42461	-0.250879	1.09573	1.70213	2.64261	1.45776	3.21924	0.0541841	-2.38	3.80155	-2.38493	0.737894	-4.03941	-0.508448	-0.44175	0.767332	1.56654	2.62693	0.97528	0.94191	1.21094	0.855295	-0.0059052
ENSG00000133246	2.26244	-1.55016	-0.554585	-0.270212	-1.4241	-0.224555	2.38683	-0.237632	-0.0980748	0.25838	1.27838	-0.998967	1.27143	-0.448052	1.56778	0.156643	1.5578	1.06583	2.78362	-0.607609	0.796231	3.23422	0.366572	-0.638583	-0.200913	2.38675	0.219425	2.94762	-3.93791	-0.959047	-0.236492	-2.06713	-0.661877
ENSG00000076003	-4.33629	-0.764762	1.0619	0.667332	1.48047	0.0173234	-0.291152	-0.230749	-1.5306	0.665122	-1.03159	-0.857758	-0.0418745	-1.31576	0.234662	-0.547571	-0.21108	-0.265941	0.0452661	0.44285	0.61594	-1.80047	-1.7122	-1.98935	-1.85359	3.31002	0.0524997	0.487484	-4.09696	-0.27773	-0.0299972	-0.138187	0.210706
ENSG00000196792	0.0492853	1.37364	-0.969853	0.894719	1.49063	-0.722076	-4.68979	0.361648	-2.33551	-1.36275	-5.16966	0.854426	-0.362863	2.69478	0.663433	-5.01831	0.466074	0.543222	-2.9605	-4.28618	1.02463	1.49956	1.3312	-2.32175	-4.56862	-0.807839	-0.378801	2.03702	-2.24322	-0.416538	-1.7849	-5.99777	0.599817
ENSG00000144040	2.26253	1.54883	2.14337	0.921975	-0.146766	-0.779324	0.67377	-0.775582	0.741566	0.46956	1.97031	4.35431	-0.121232	1.16967	1.429	4.05438	2.99239	1.28594	0.233975	2.24923	0.200453	1.33851	0.000771903	0.128717	0.803118	1.85165	-0.914766	1.28636	-2.50702	1.92217	0.319017	-0.295487	0.238892
ENSG00000115738	0.0244518	2.42944	1.46358	0.567601	2.54215	2.10351	1.13654	2.77687	0.842972	0.0242218	1.46934	1.15965	0.651927	-1.38537	0.966416	0.595562	3.12732	3.29486	0.676458	-0.623957	0.512151	-0.443071	3.04016	1.9931	1.47099	0.484462	-0.723715	2.86328	1.63962	0.0743008	0.9516	0.282838	1.86713
ENSG00000198865	-3.69905	-1.70268	1.35422	3.47153	0.14204	-0.0899655	0.481688	1.17971	-2.14487	-4.23646	-0.211755	2.14679	-1.37192	-0.217504	-0.613155	0.388071	-0.276746	-0.54013	-0.344989	-0.250043	0.165483	0.632047	-1.43253	-0.889796	-0.65199	-1.76798	-0.768977	0.0469624	1.37202	1.19255	-0.968266	-0.129948	0.137769
ENSG00000164099	2.06756	2.34973	2.94976	2.94265	1.70306	3.05064	-0.938533	0.284283	0.325404	-0.580807	-0.422079	1.24652	1.05757	2.87586	0.0104452	-0.41553	0.111321	0.207436	0.478561	-0.812667	2.00541	0.408013	-0.663145	4.01568	4.45488	1.90485	1.93272	0.982559	0.559993	6.22451	1.49124	0.850879	0.595628
ENSG00000095596	-0.0271922	2.46711	4.00021	1.24793	1.77865	-3.98604	-6.30409	0.326827	1.29748	0.369209	-2.06982	-0.241968	-1.20538	1.05376	-0.9946	-1.75872	0.52619	0.0328959	0.57293	1.84462	-0.107901	2.50847	-0.227097	-2.03728	-1.74198	-1.97986	-1.39312	-0.346868	-0.871995	-0.586306	-1.20058	-0.52848	0.0531977
ENSG00000100353	-1.06797	-0.170761	1.57686	1.74326	-0.91017	-4.39266	3.91954	2.3752	4.01154	1.12609	-2.33582	0.0198332	-0.118299	-0.130777	-0.255358	0.93417	3.84937	0.928461	1.35047	-1.45491	-1.81188	0.461135	0.00384569	-0.0943838	0.109595	0.253237	-1.6261	0.367535	-1.08105	0.969946	0.186449	1.80944	-0.30994
ENSG00000105339	2.51745	-0.37681	-1.06424	4.21287	-0.882418	-4.42846	-1.09801	1.27375	-0.897686	0.0193608	-5.57601	-1.00445	-2.78692	-2.40265	-2.51744	0.367567	-3.04488	-0.602005	-4.56033	1.19879	-0.737763	0.18882	3.40288	-2.51598	-1.85689	-0.515554	-1.15691	0.531308	-0.622365	-0.322247	1.91868	-0.71937	1.03433
ENSG00000265491	-0.632757	-1.57752	-0.814895	0.56185	-0.514947	4.48164	1.59604	-0.178168	-2.11021	-0.18016	-1.42928	-0.431447	0.772886	0.278371	0.370968	0.731085	0.280541	0.0841777	0.266014	0.039068	2.43857	-0.0286403	-1.21097	-0.400093	0.151207	2.13069	-4.93655	-0.631483	1.4948	3.78511	-1.18207	-1.81798	1.10411
ENSG00000060558	2.35271	0.899519	2.64538	0.68895	0.873384	0.796123	2.7821	1.75975	1.55086	1.35589	3.47954	3.1107	0.82798	0.120031	-0.739775	2.38622	1.71843	1.65078	2.5757	0.0288214	1.13578	0.356507	1.37501	2.00557	4.6239	1.15856	1.26597	0.661651	1.10193	-0.243253	1.54641	2.18784	4.6066
ENSG00000164061	-0.383545	0.0737183	1.93854	-0.122923	-2.39111	1.23435	-2.20804	1.87779	-0.0426468	-2.51814	-0.432898	1.5673	-1.11201	0.56489	-0.197509	-0.531792	-1.01074	-0.0883411	0.0115557	-0.3527	-3.92275	0.184642	-0.844636	-0.167639	-0.793191	-0.127948	-0.884286	3.39643	0.867342	2.20872	-0.475421	-2.30219	1.98442
ENSG00000147872	3.16186	-5.31095	-0.413681	0.512808	1.32407	-0.533865	1.09038	1.6154	0.826435	0.272119	0.303188	4.30153	0.00954621	2.73468	-0.258805	3.16091	5.41063	0.689488	0.332214	0.428457	-1.90192	-2.01985	-4.09516	0.119193	-0.917715	0.429237	1.54129	0.939958	0.838239	4.86803	-0.323454	0.652339	0.894427
ENSG00000014138	0.930475	1.41754	-0.420292	-1.08032	-3.38599	-0.198111	-2.33406	-1.33521	0.441396	-1.09396	-3.55077	-2.77106	-1.06323	-1.6251	-2.28291	1.17313	1.06886	-1.26035	-0.0836288	-0.535963	5.29569	0.00396178	0.186982	-1.68256	-2.96287	-6.14476	0.42921	0.705812	-1.44779	-4.1256	-1.12677	-1.08009	3.21918
ENSG00000198286	0.348353	1.22462	-3.34576	0.506619	-0.526274	0.17276	-1.74032	-0.940829	0.164299	-2.98561	1.03157	3.01597	-1.65548	1.90975	2.45962	3.10367	-0.0596408	-3.78358	0.818691	-6.99669	1.26235	-0.66717	-0.483261	0.0929466	-0.860613	-0.576034	3.07957	6.85191	-0.320832	1.83246	-1.27495	0.839357	0.489837
ENSG00000126603	1.07245	1.54281	3.68599	0.229029	-0.371882	0.395251	0.650064	0.286075	-0.869454	0.531036	-4.68045	1.27552	0.0751662	3.14323	-0.389823	-1.20997	2.89935	-1.70661	-0.257413	-0.887102	-0.40766	1.90836	-1.64491	-2.45449	1.09511	-3.16076	-0.22046	2.72915	0.0802642	-0.056745	4.34932	0.0683237	4.54314
ENSG00000117298	1.5245	0.531576	-0.29905	-4.59556	0.743889	1.06275	0.32049	0.575994	-0.212248	-3.5327	0.434032	0.643036	1.09746	1.54319	-0.416184	3.2354	1.55439	2.94479	-0.43122	-0.492423	-0.287436	-1.06007	0.300208	0.752724	-0.612507	1.49078	0.826604	0.661179	0.0165602	-0.198868	0.117672	0.0644679	0.449023
ENSG00000075711	-1.64728	-0.781084	-0.49876	-0.000561186	1.33837	-0.726125	3.79783	2.63723	0.152738	-0.281263	-0.581759	0.515067	-1.3194	0.0202725	-0.479029	-0.476345	0.835742	-1.91201	-1.05018	0.143737	-2.24635	-0.86543	-0.906442	-1.86718	-0.971757	0.512375	-1.10652	0.926263	-2.27096	1.30943	1.78636	0.385763	-0.860598
ENSG00000163873	0.904245	0.192605	-0.714017	1.71574	1.66138	2.16616	0.706275	2.6042	2.1492	-0.115707	-0.601542	0.777981	0.913371	-2.68768	-0.855624	-0.446218	-0.400924	0.710695	-0.198391	-1.2143	1.08083	-0.10178	0.934112	1.16942	1.38692	1.71621	3.79955	-0.595914	1.89396	1.05307	-0.14787	0.539525	-1.00191
ENSG00000102893	-1.6894	0.698349	1.24066	-0.079081	-0.763746	-0.676826	-1.80844	-4.1859	1.87334	1.26836	-0.871071	-4.30924	0.111575	1.45409	4.33621	-0.0551147	-1.99777	-2.11713	-0.210391	-1.58865	-2.86399	-0.26675	0.900674	0.827475	3.45141	4.42818	-0.478444	-3.52972	-0.139699	0.130144	1.05161	4.32366	-1.28078
ENSG00000081803	-0.520352	3.21846	-0.0222416	-0.743801	-1.79073	1.25777	-0.45265	0.775512	2.0635	1.01896	0.0507166	-1.0506	1.66594	-1.54596	5.65713	-3.20932	-0.696833	1.07342	-0.619157	-6.68059	0.900425	1.50951	0.949148	-0.456717	-0.30869	1.14538	-0.580815	3.46415	-1.42823	3.69242	1.51484	0.757461	-1.44043
ENSG00000164125	-1.74397	-0.281085	-1.22876	-1.0454	-0.584365	-0.27142	-0.0263438	2.60046	-0.198645	-0.348659	1.71135	-2.51937	-1.24345	-0.88901	3.40714	-3.59524	-2.19252	-6.65042	-0.256862	-2.28535	0.821648	-0.117441	-0.0699114	-3.04085	0.596127	-3.81834	-2.00563	-2.68305	-0.733263	-1.11142	-0.995984	0.0293627	-0.315473
ENSG00000018408	-1.35386	-2.60778	1.33455	0.62816	0.607449	0.00170236	-1.56649	2.48642	-1.35703	-0.563436	-1.45759	0.285794	0.415014	0.240641	0.75008	-1.95462	-0.38135	0.83768	-1.96431	0.14541	0.576139	0.508214	-2.27288	-0.297101	-2.12699	-3.57171	-0.677483	0.263132	-0.946137	2.13509	-3.87841	-0.779241	-2.76454
ENSG00000107864	2.59011	4.14315	3.87285	0.369908	0.73685	2.62105	-0.194924	1.28443	0.183028	1.60454	0.840048	-0.750806	-0.203243	-1.76402	0.291408	1.34561	1.13245	0.280709	0.145635	-0.945861	-3.4391	-0.480163	-0.322932	0.962975	0.574982	1.15703	-0.529428	2.20122	-1.0065	0.297961	1.15557	-0.208175	-1.09947
ENSG00000178623	-0.593007	0.361552	-1.51684	-0.174637	2.52919	-2.30768	-2.52578	-2.3863	1.65627	-1.20533	1.91794	0.501987	3.4295	1.72892	1.45868	0.656192	-0.489792	3.79119	0.195861	0.545907	-2.17057	-1.07597	3.77166	-0.125295	0.308804	0.927321	-1.6029	0.908634	-1.81922	-1.29335	0.264855	-2.11685	1.42278
ENSG00000198797	-0.464842	0.0235648	0.305693	0.364128	1.28725	0.197781	-0.351536	2.40385	-1.41446	-2.43741	1.22556	-0.0204988	-0.98734	2.39272	0.782865	-0.701208	1.15609	-0.0238476	-0.230185	-2.40198	0.4723	-2.56515	-2.82382	1.97867	3.16391	4.57054	-0.842291	1.78069	-0.885243	7.75166	-0.198209	3.74462	-0.156963
ENSG00000151025	-0.681876	-0.240012	4.06635	-0.119454	-2.58244	0.477659	-0.954736	-0.0849993	-0.472076	0.459142	0.701088	-0.0991523	-0.790996	-2.23943	0.405074	2.76603	-0.457322	2.21967	1.13373	-3.90759	2.50804	0.738555	-0.575666	-0.126189	0.898927	-0.439316	3.14253	5.61468	0.890033	0.898359	3.48158	-0.740921	-0.134393
ENSG00000162639	-2.11204	1.45515	-2.5311	-1.96324	-2.08	0.0483399	3.37093	3.35174	2.02391	4.62722	-2.68469	1.36608	-1.64377	1.71098	-1.72069	-3.57611	-2.81203	0.710985	-1.00809	0.546648	1.66627	5.2451	2.55005	-1.45789	-1.59732	-3.31442	-4.84485	-0.428652	-0.155453	-1.49979	0.537565	1.09261	2.08185
ENSG00000204179	1.08542	0.788168	-0.307433	-0.800685	-1.08696	-2.82304	-2.55909	4.03895	0.296798	0.878133	0.822812	1.56938	1.49364	0.971138	-0.504259	2.25289	0.473426	2.10524	-1.86026	0.211478	-3.3243	0.180377	-1.62834	0.208753	0.176977	1.55635	1.50301	2.68539	-1.20924	5.30051	1.066	0.0166483	-0.971864
ENSG00000146555	-2.64806	3.47874	0.566929	1.47805	-0.973202	-3.19522	-1.94291	-0.120644	0.463413	1.67816	-0.232512	0.807981	-0.60906	-0.899661	1.04671	1.61032	-1.19804	0.327347	-0.0866056	-2.90435	-0.0243566	0.663859	-1.06725	0.116363	-0.0791285	1.69967	-0.62978	0.483797	-3.18175	-2.7958	-0.741985	-1.1271	-1.78739
ENSG00000137441	-8.33706	-1.38491	-1.80429	2.76334	-0.885234	-0.63318	-2.95813	-1.25209	-1.86356	-1.16125	-0.839378	-3.67443	-1.32298	-2.91807	-2.88982	0.987106	-2.01268	-2.50735	-2.03305	2.4195	-0.0402518	-1.47863	-1.26753	-4.30056	-2.45541	-4.76689	-2.18826	-4.09776	-2.68299	-0.823615	0.761236	-3.54537	-3.03152
ENSG00000159625	0.102982	-0.786854	2.38887	3.50289	1.87262	0.417197	0.403815	1.38128	-4.62814	0.662594	-2.52186	-2.22466	-1.93884	0.221087	-2.4494	-3.07536	-1.44143	0.375409	0.179352	-1.02017	-2.95514	4.16508	-0.498163	-5.67289	-1.06559	1.3068	-2.74502	-1.66768	-2.62649	-0.357558	0.435638	-0.37373	-0.565023
ENSG00000101546	-0.460933	0.656552	0.228463	0.0915542	-0.226201	-0.0232206	0.086859	1.31445	2.24053	-2.08816	-0.920149	0.216152	0.30428	-1.45526	0.775216	-0.718221	0.885348	-0.757116	0.794608	0.0642237	2.95438	1.15191	-0.064201	-0.109254	-0.172216	0.549829	-0.859085	0.379647	1.21942	0.587668	1.97196	0.879916	-0.385318
ENSG00000119125	-1.32959	-3.98673	2.41037	-3.10592	1.54366	0.264618	-1.40382	0.771671	2.6817	2.54235	5.7688	1.37781	3.27983	-0.759413	2.32665	0.910166	3.06009	-2.50087	1.95783	-1.16348	0.412507	0.519509	6.62275	-2.08277	-0.0843995	1.25798	5.23594	4.11228	1.83633	1.30089	-0.79865	-0.673643	-0.106071
ENSG00000177106	1.6488	-0.602852	-0.45563	0.228939	2.69025	-1.41739	1.05653	1.11968	-0.890949	0.237384	3.66477	2.02979	-0.685598	-1.54127	0.241922	-2.20019	0.949904	-0.0682332	2.07169	-4.11223	0.747093	0.484941	-0.63191	-5.08339	-2.13962	-1.18468	-0.135499	2.64116	1.08792	-0.2922	0.452566	-4.54145	-1.71664
ENSG00000095587	-0.47437	-0.792395	-0.953106	-0.395236	-0.903374	-0.783969	-1.09548	-0.358473	-0.598929	-0.197804	-0.499677	-3.24116	-0.636114	-0.707886	-0.316781	-0.292129	-0.787617	-0.780023	3.23271	2.56343	-0.189713	0.083447	-1.08037	-0.702709	-0.52798	-1.13389	-0.520359	-1.21888	-0.486349	0.00978573	0.170991	-0.411072	-0.334938
ENSG00000149798	-0.911787	-2.83917	0.171325	-0.541985	0.158734	-1.29529	-1.85055	-0.231419	0.455907	0.780883	-0.206363	0.462767	-2.5257	-1.6443	-1.09148	-4.07557	-2.56602	0.492446	-3.00251	3.63066	0.44514	2.07331	-0.803607	1.01369	1.47594	-0.713687	-0.56626	1.26501	2.04992	0.437923	0.796999	2.12577	1.51239
ENSG00000003393	0.430238	1.01292	0.582336	-0.757503	2.24043	0.615426	1.17795	2.44438	4.90673	1.43234	-0.292296	0.612976	2.23116	-1.14411	-0.32394	-1.43867	2.15253	-0.664742	0.477574	1.22606	1.01564	3.80627	1.1941	0.369006	-1.19416	-0.938857	0.396437	4.51537	2.37571	-0.219802	1.75852	0.183174	0.138196
ENSG00000156026	0.687859	-0.0902568	-0.562472	-0.0561854	-3.21978	-3.08838	-0.320715	1.27806	-0.13086	-3.8918	1.60545	1.38998	1.18099	2.3419	1.25364	-0.597744	-0.025004	2.25812	1.69024	-0.908683	-3.86882	-1.96752	-1.17451	-2.24283	-5.17285	0.12734	-4.00735	1.62785	-1.02332	3.3948	0.760848	0.912973	-0.178622
ENSG00000100884	-2.04283	-2.73433	1.63178	0.448546	-1.30195	0.298993	2.35272	1.37347	-1.15752	-0.559744	0.534186	0.668927	0.388934	0.0255192	0.768976	0.0233875	0.255976	-0.489589	-0.0767523	-0.0668821	-1.95768	-1.27909	3.21079	-1.4133	-0.869012	0.029361	-4.4856	-2.46147	1.39435	1.59997	0.106962	0.823594	0.101717
ENSG00000105677	-0.13842	0.459198	-0.285277	-0.62374	-1.47663	0.496824	-1.1199	1.10244	0.436497	0.971181	2.71912	1.43619	-0.498601	0.0248397	-2.23495	0.447884	-1.39211	-0.116679	0.258397	-2.33826	0.10606	-0.231395	-0.482166	-0.267467	-0.109434	0.658476	1.50022	1.13412	0.570077	1.20133	-2.01189	-0.940562	-1.15292
ENSG00000141424	0.287629	1.34207	3.52227	0.247517	0.611946	3.16114	2.33102	-2.88639	1.18742	2.09898	0.367911	0.932665	-0.537169	-0.776433	0.15539	0.33934	-0.257512	-3.78438	-1.40223	-1.55754	0.842162	1.38209	1.56709	0.772368	1.43893	1.3964	0.386206	0.316276	3.36374	1.96529	0.532358	0.612649	-0.705018
ENSG00000154764	2.93263	1.29263	4.96322	-1.31794	0.103095	0.377907	3.88275	1.7496	-1.23329	-1.10591	-0.160401	0.408025	2.34263	-0.651384	-0.227864	1.61709	0.555391	4.14899	-1.58639	-2.00685	-2.21133	-0.516274	-0.906155	-1.26113	1.69989	0.0106156	-7.80287	-2.72521	-0.725424	1.25221	0.729095	0.436746	-0.0909065
ENSG00000096093	-2.02486	-0.0141037	-0.797917	-2.08976	0.357215	-0.308202	-1.69486	-2.7395	-0.964641	0.528249	-2.57054	5.40487	1.59515	-0.167865	0.0328573	-0.613488	0.304031	1.72469	-3.36112	-2.18305	0.24382	-0.613234	-0.439374	-3.38611	-1.19671	0.480892	0.477912	-0.894034	-1.56628	-0.773483	-4.69163	-6.90359	0.0360557
ENSG00000134759	0.245737	-0.877716	0.153748	1.47878	0.727073	-0.0718394	5.13182	0.805431	-1.31747	4.04037	0.345069	-0.304763	-4.44383	1.67728	-0.987638	-2.83598	-2.76865	-0.96588	1.94225	-0.481275	-1.50971	1.48392	2.98009	0.304078	0.594495	0.119311	-1.50913	0.0530491	0.538903	6.5931	-1.30507	0.175357	1.82758
ENSG00000172830	0.436066	2.33254	0.985731	1.74789	-4.83987	-2.38576	1.58421	0.561278	-1.13321	-0.218257	-0.843212	-0.657449	1.45494	0.241086	0.755026	0.542831	-0.122185	-1.21219	2.43571	-1.44099	2.52546	3.97243	-2.21117	-0.504929	-3.68625	3.56651	-2.71883	-0.341701	1.12859	-0.0267806	0.803015	0.24111	-0.333108
ENSG00000166831	0.478011	1.10804	-1.44734	-0.400992	-1.42654	-0.197064	-0.583556	-3.39786	0.873983	-2.4379	0.198408	-0.489204	-2.71941	1.09659	-1.67731	-1.77598	-3.4469	2.29412	-1.59676	-1.79395	-1.6115	-0.108463	-0.327245	-0.764284	-0.950645	0.141903	-1.235	-0.965134	-3.00239	-0.710626	-1.39539	-0.674421	-0.666545
ENSG00000171303	0.690612	0.183201	-1.20045	0.768281	0.48832	-0.252091	-2.07412	0.410753	1.02807	-2.58069	0.99115	0.994074	0.336584	0.859542	0.489254	6.02459	0.543436	1.28115	0.630485	-0.133878	-1.06848	1.15055	-3.63257	-0.346653	-0.980313	-0.758037	0.133409	2.95617	-1.67429	-0.536843	1.01166	0.146143	-2.11881
ENSG00000134531	0.183541	0.0915031	-0.20542	0.426551	0.199037	0.151079	2.57404	1.63629	0.203084	0.252332	0.05908	0.854521	0.606605	-1.99606	-2.95119	5.0134	-0.280872	0.960183	0.402675	-1.19381	0.737798	0.515683	0.728566	2.1046	-0.00806083	-0.615417	-0.0052804	1.03095	-0.296187	-0.665778	-0.934287	-0.186609	-1.66673
ENSG00000133107	-5.0277	0.200914	-1.38836	-1.44032	-2.25496	0.462313	-1.06783	0.531578	3.80949	0.580526	-0.766965	1.35015	3.01264	1.65176	0.763255	3.19693	0.162215	2.60672	0.591483	-1.09401	3.68038	1.91951	2.65157	0.841484	0.939571	1.3666	-0.668626	0.312091	-1.70441	0.87425	2.32885	-2.46248	-2.17082
ENSG00000007174	-0.478822	0.467445	3.4118	0.275455	1.94977	0.964578	3.85294	6.36677	2.52325	1.21552	-0.887524	-0.431267	0.352591	1.75246	2.64506	6.86127	4.78169	1.52681	0.893401	1.26972	1.6331	-1.04806	-1.17509	0.160112	1.79134	0.226072	-6.37643	3.01129	1.38773	4.82309	0.679165	-0.538302	0.192068
ENSG00000101489	1.77167	0.251909	2.16239	0.472919	1.44073	0.246901	1.29418	2.7752	0.565783	0.677415	1.4013	0.749022	-2.08875	0.507902	2.076	-2.28246	0.870692	0.921984	-0.663924	-2.73554	-1.19745	2.70531	0.942406	-0.00509997	-1.13236	-0.803386	3.77321	3.32431	-0.255773	-0.333158	-0.746456	-0.755105	0.786315
ENSG00000091164	-4.66625	-0.844812	-0.537251	-0.874139	0.732094	-1.349	-1.40278	-0.744985	2.78113	0.502223	1.25504	2.01169	0.668071	-0.150894	0.849739	-0.0310534	0.0653942	3.0375	1.87947	0.804911	-0.632083	0.957177	3.26969	-0.452159	-0.23681	0.0282384	-0.866512	0.431226	1.18926	0.0183745	-0.944132	-1.19097	-0.383152
ENSG00000132854	-0.762662	-0.903734	-1.49042	-0.0956927	-0.577363	0.605609	-0.485531	-2.28692	0.612047	0.364236	-0.793387	-1.1016	-1.41072	-4.00963	0.341639	-1.26404	-0.281134	-4.64662	-3.18927	-1.81733	-0.252451	0.70171	0.334557	-1.36483	0.526035	-2.05958	0.0189305	2.48594	3.00908	-1.0306	0.293431	0.194954	0.822645
ENSG00000185909	0.100466	-0.233443	1.38746	0.0239829	0.776264	-0.0842888	3.0259	-2.56074	-0.750315	-0.108651	-2.76833	-1.21163	0.734762	-0.421972	-1.37394	-0.362977	2.64785	-0.223359	-1.163	-0.41876	0.00966616	1.4259	-1.06221	-0.431164	0.18352	1.62484	-3.06459	0.724719	-0.492689	-2.28806	-0.654882	1.96343	2.39004
ENSG00000187730	1.25576	1.31554	-0.429957	1.60814	-1.1	2.70797	-3.24346	4.8063	2.92359	4.33306	1.69075	-0.929389	-0.292015	3.19623	-1.13435	-1.78788	-0.363768	-0.650699	-0.691085	-0.047041	-2.71489	1.27433	-0.0683129	-0.660919	1.50795	-0.610611	4.08686	3.63507	2.45036	-0.521616	1.27198	4.57798	-3.23249
ENSG00000166341	-0.708162	-0.671154	0.543741	-0.4297	-0.108338	-5.72063	-1.93636	-1.75898	-0.396332	1.16942	0.221213	-0.0194071	-0.221691	0.719755	0.471625	0.0249818	0.919926	-0.80036	1.99095	0.535147	0.916651	0.997796	-3.95313	1.00788	1.56312	0.686383	-0.575759	-0.111522	-1.82802	-1.1783	3.9952	0.63555	-1.15896
ENSG00000103375	-0.278028	-0.334373	-0.068721	0.637576	-0.26714	0.562623	-0.350921	-0.619733	0.4076	0.0060876	-2.11018	0.322083	-1.16071	-0.301118	0.907075	0.822544	-0.615963	-1.37728	1.09478	-2.56417	-1.85395	1.27072	-0.329486	0.487314	0.811303	-0.7439	-0.340452	-0.264395	-0.799833	-1.63016	-0.33992	-0.0936348	0.271165
ENSG00000204387	-1.44607	-1.45155	1.06793	-0.205255	-3.55244	0.280843	0.000415038	0.956551	-0.00964754	-1.91914	-1.28895	-3.55686	-1.6211	3.11384	0.325956	2.28298	-0.709377	-3.41905	1.42952	2.28254	-1.6986	-0.710896	-1.39937	-0.565092	-0.406457	-0.465132	-1.36059	1.80421	4.65741	1.31145	2.27739	2.04861	-1.28467
ENSG00000170396	0.69031	2.3107	1.03949	0.998458	-1.61222	1.92243	1.03405	0.851907	0.753402	6.71253	0.596159	0.102879	-0.671454	-0.374048	1.74143	-0.33357	0.372328	0.418096	0.326353	-1.22577	-2.89252	1.7475	0.315772	-0.00392425	-0.676176	0.124799	1.26134	2.18236	-2.18159	-1.54926	0.0447959	0.244468	0.133196
ENSG00000082397	-2.64225	-1.24746	1.10439	-0.00528284	1.31865	2.84033	0.615932	1.5244	-1.86447	1.73518	0.24506	-3.88621	0.0808638	-1.32764	0.38487	1.21008	0.276017	1.10551	0.310427	-1.18145	5.17328	2.34316	-2.0588	0.333212	0.105058	-0.107019	0.980866	2.22011	-3.65053	0.200728	-2.27566	-0.616225	0.4079
ENSG00000060140	5.13365	2.97685	-0.112724	0.652749	-0.971415	-1.09039	0.81159	-2.58224	3.03114	-1.05968	1.64426	1.91083	0.553294	-0.948489	2.18616	-0.521167	0.278827	1.14665	1.31621	-0.0961323	-0.47909	-0.106071	1.13738	-0.458281	5.05069	0.40643	0.359364	0.781459	2.32733	0.585433	0.324424	-0.10151	0.0667907
ENSG00000165568	-0.669804	-0.586699	3.01579	-3.82381	1.99144	-1.5369	-1.65349	-0.572582	2.00439	-0.207573	0.17245	1.6038	-0.593657	1.84736	-0.121116	-1.36148	-2.68668	-1.04502	-0.691543	0.634346	1.07651	5.14127	0.918729	-0.190439	-1.0721	-0.34801	-0.751914	-0.00247041	-0.659914	2.20923	0.426509	0.976991	3.40098
ENSG00000136141	-1.25197	0.435381	-0.566697	-3.32008	0.00456607	1.79807	1.4029	-0.562628	-0.396592	0.195842	0.403899	-1.38211	2.36031	-1.83043	0.0880312	-2.16633	0.140719	4.87013	0.312264	-3.86203	-2.72472	2.10594	0.769421	-1.40811	-1.20851	-4.65682	-0.0826003	1.34655	-0.0792557	1.34774	1.22151	3.17776	0.368524
ENSG00000182601	-5.44324	1.28012	-1.74516	-1.93954	-0.123734	0.588368	0.184477	4.34898	-1.32483	-1.93325	2.48659	-0.498591	-1.16577	-0.457334	-0.748991	-4.27023	-0.00486057	2.64536	1.44287	-0.663314	1.46604	1.67563	-0.726116	1.03249	-1.08606	4.51489	0.380624	0.71169	-0.0330054	0.448164	0.65399	-0.804517	1.00439
ENSG00000196975	-1.04486	-0.545886	0.827514	0.624094	-1.07377	-0.394176	-4.04843	1.00725	1.29025	-3.19952	1.06934	0.231414	0.227948	-2.21771	3.19614	1.26711	0.774051	0.0261433	-3.53801	-0.450941	2.58557	0.309734	-0.29322	-0.172838	0.136918	-0.890715	4.06973	0.814515	0.233777	-1.93838	0.161114	-2.47027	0.462127
ENSG00000158022	0.842242	-0.130144	-1.05449	0.964507	-1.2441	-0.560433	-1.10765	1.6316	0.458244	2.39968	-2.3983	-2.51636	-0.688727	-0.416892	-1.96458	-0.274645	-0.732679	-0.913712	3.73899	0.410351	-3.57215	3.18441	0.327206	0.273784	-0.00802079	-3.69127	-1.83359	-0.0121942	-2.4182	-1.03658	-2.98811	-4.43707	4.75825
ENSG00000273079	1.04208	0.429464	4.14952	0.346961	-2.73345	1.58711	2.5644	3.2352	0.285343	2.41747	6.34057	-0.69019	-3.47784	-0.166968	-0.238542	-0.317431	1.31799	0.546936	2.2627	0.208056	0.0387762	0.771634	-2.2786	1.3062	4.02186	1.97103	2.44465	6.93447	4.15511	3.41792	3.7203	-1.33448	1.83551
ENSG00000275835	1.45375	-2.68334	2.15513	-1.07151	-2.74874	1.55691	-1.54196	-1.23803	-1.0604	-0.399491	-0.0250159	-0.608765	-0.817257	3.92408	1.82789	-1.41312	-2.87964	-1.28642	-1.61995	-0.692022	-2.54992	1.69683	1.68466	1.13374	-1.25389	-0.957004	-1.66945	-2.48734	-3.66442	0.842839	-0.83604	0.184952	-1.21833
ENSG00000135423	0.0462798	-0.661885	0.0808398	0.791749	-0.799723	0.185652	-2.58037	2.20216	-0.773534	1.26109	0.428084	0.928557	1.16569	0.494202	2.4671	1.24118	0.0664038	0.979039	0.869034	-0.327233	-0.576694	1.37239	-1.48075	-0.120256	-0.507546	-0.541772	0.139251	5.12102	-0.73033	1.02454	-0.127984	-0.228775	1.85126
ENSG00000157064	-0.962636	-0.766331	-1.07923	-0.570459	1.99121	2.63015	2.02178	1.74276	-1.45009	-2.07592	0.909565	-2.65915	-0.382494	-0.638142	0.285416	0.931274	1.00621	0.376631	1.22065	-0.257282	-1.88846	-0.643901	-1.49695	-0.463984	-0.714955	-0.415523	-1.06726	6.50742	-1.63783	0.907122	-0.871176	-0.360459	1.74308
ENSG00000082996	-0.463392	-0.669237	2.40079	0.140828	-2.86911	0.738426	0.698234	4.77244	1.37654	6.63553	0.53137	5.09417	5.90225	2.88099	0.984452	-1.09445	0.0787129	1.36215	1.74594	3.06476	-0.241903	-1.03438	0.593954	-3.09548	0.389278	3.32369	2.44232	4.56313	1.63702	0.791179	-2.54278	0.0545527	-0.78625
ENSG00000101442	1.25271	4.59403	1.38195	-1.33353	4.22358	-0.339536	0.748204	2.34211	2.54765	0.851517	2.23285	-0.477685	5.22624	1.92557	0.00136854	-1.29832	3.7203	0.769974	0.377417	2.47204	-0.363977	2.24546	-2.86932	0.933946	2.27148	1.56775	1.81287	4.31459	-1.22402	0.3086	0.031742	-1.34432	1.07799
ENSG00000160216	-0.518523	0.136689	-0.987361	-0.0632655	1.64465	-0.560369	-3.31637	-0.804375	-2.66049	-0.148981	-0.060317	-0.710882	0.54437	-0.0464267	0.14907	0.598367	-0.172148	-1.92172	0.572928	0.824576	0.375652	-3.03476	-0.801288	0.306625	0.347497	0.14262	-0.101402	-0.188754	0.839902	-4.47784	1.14992	-2.16805	-0.320402
ENSG00000109736	-4.31421	2.73495	-0.0656018	0.817325	0.968	1.60429	-0.261717	-0.564077	-0.14036	-0.00886467	-1.66489	-0.0163147	-0.106435	-0.206836	0.433665	0.0760264	1.58062	-0.469906	0.0734947	-0.768045	-0.783598	-0.383301	-2.43398	3.4213	5.3059	0.340961	-0.791443	0.123598	1.51308	-0.514094	0.941391	-1.56879	4.03509
ENSG00000181215	2.50392	0.516196	2.93837	2.34285	-0.138723	-0.135113	-1.45835	4.39667	-0.145731	1.3593	0.0266555	0.129785	0.487467	1.58082	2.43656	-0.456323	0.772143	-0.556447	-1.13603	-1.12512	-0.770187	1.97901	-1.58478	1.23824	0.953932	1.81364	-1.25026	-0.542736	-1.63181	0.923156	1.75405	-2.03319	7.48956
ENSG00000163166	-2.32711	-1.05811	-2.35617	-1.48628	0.772312	0.780766	-3.55435	2.29494	-2.22582	-2.5194	-3.59393	2.45606	-0.0660081	0.778631	0.426008	0.797531	0.988221	0.193124	0.326422	0.857833	0.269996	-2.15757	-1.12314	-0.586228	-0.215301	0.305237	0.151759	3.48665	-1.96595	-0.489305	-1.73123	0.628045	0.94843
ENSG00000105650	4.27177	-0.901961	-1.34564	1.83331	-1.81472	-0.167751	-1.96875	-0.962436	1.67614	-0.509037	0.967929	3.1136	0.266032	-0.938503	-0.792257	0.23177	-5.13735	0.585408	-0.263034	-0.993198	0.523104	-0.770166	-0.408423	0.37737	2.30154	-0.923243	-2.55131	-1.26137	4.04409	-1.62717	-1.15464	-0.604447	-2.78165
ENSG00000142867	6.2676	0.949009	0.162642	0.0718626	0.730051	-0.553745	1.3336	0.368071	-0.410636	-0.312825	0.698989	0.450031	-0.632333	0.0641282	1.24461	0.748178	0.62958	-2.5226	-0.178585	-1.36343	2.23227	1.78325	-0.908468	1.03677	1.43414	1.07109	1.4572	0.417192	0.702842	-0.563667	-3.91357	1.53382	-0.883053
ENSG00000176422	-1.25365	-1.96681	2.04775	0.187841	-2.52863	-0.146004	3.03739	2.45177	2.23314	3.10899	-0.599282	-1.30538	-0.385835	-0.705998	1.3855	-0.86986	-0.743482	0.254557	0.462876	-0.187297	1.79088	1.63095	2.1828	-2.1703	-1.07718	1.96568	-0.637041	-2.02004	0.786785	1.72719	-0.325726	0.299178	0.219975
ENSG00000021762	1.7366	1.17516	4.21017	-0.670391	-2.09648	-3.10311	0.695062	-0.44131	4.51432	0.93372	-0.0934933	3.93085	-0.0362728	-0.93042	-0.51129	3.45604	3.85195	-1.35943	-0.314787	-0.131056	-2.73547	2.44671	3.24386	0.227123	-0.028792	1.15083	0.76005	1.23387	-0.949999	0.26744	0.46171	0.0436327	0.112225
ENSG00000196208	-0.820313	-3.75743	-0.72536	-1.74762	-0.274509	-1.09928	-2.71768	0.0355119	-2.02338	-3.1843	-2.43691	2.51907	-0.598042	-0.567484	-1.44365	-4.36104	-0.954624	-1.06238	2.49003	0.887841	-0.271362	-1.24005	-2.10178	-0.674249	-0.206082	-0.191735	-1.06219	-1.58162	-2.06684	0.00151694	4.07215	-0.123801	0.913463
ENSG00000158109	0.0136609	-0.335097	0.0497272	1.01304	2.83725	-0.683226	-0.0875388	0.681556	-0.41893	-0.914678	0.0864513	1.26497	-0.232373	-0.247701	-0.14158	-0.247041	0.224613	0.186783	0.425456	0.84325	2.37202	-3.46782	1.07351	-0.70003	-0.395062	-0.193236	-0.909001	0.613601	-1.63173	0.0695061	0.476378	2.02835	0.667784
ENSG00000160808	-1.29425	1.21748	-1.92689	-0.811681	1.02063	1.26623	2.28578	1.77465	2.00601	-2.08927	-0.365679	-2.25455	0.0157438	-0.309237	1.74502	0.612149	-1.52376	0.318209	-2.58553	1.59582	2.15466	0.118664	0.439999	0.917062	1.72094	-1.10411	-2.99033	1.09223	1.90906	3.4861	1.39913	2.07255	-0.849009
ENSG00000082014	0.818054	4.41311	0.0940409	2.37084	0.751428	-2.1688	0.462277	-0.178904	1.05989	0.154468	1.50034	-0.327942	-0.683781	-0.551329	-0.863417	-0.814469	-3.55511	2.22015	-2.69464	-0.178521	0.404661	1.81787	0.199523	-3.15737	1.21789	-0.0345966	-0.5802	1.98229	-1.00191	-2.38614	0.11296	1.43178	1.05579
ENSG00000160801	0.818944	1.05447	3.93371	-2.03094	-1.73199	2.40713	-2.67783	1.45084	-2.39777	2.75053	1.55709	1.3977	-2.07246	-1.17227	1.74882	-1.86146	-0.551525	-2.87288	-0.730676	-0.504435	-0.422086	0.454726	0.938248	0.773743	2.10311	-0.235117	1.11343	-1.10649	-0.932954	0.7833	2.76711	-1.53656	-1.49556
ENSG00000178184	-0.448243	2.7439	-0.107846	-2.05869	0.940423	0.881546	-0.40537	1.87581	1.40713	-0.100029	-0.154293	-0.614762	1.9493	0.44546	1.25294	-0.0379199	2.66187	0.992915	0.579621	-0.202745	1.20238	-4.75017	-1.08594	2.07468	0.305792	2.97896	-1.60978	-0.501171	-1.76783	0.566171	1.87503	-0.0842283	-2.20564
ENSG00000130695	-0.655354	-3.45123	2.7693	1.4695	4.7754	1.20091	-0.685991	-0.408015	1.45799	1.17058	-0.710516	-2.78373	-1.0087	-2.25894	0.147087	-0.581625	-3.31868	0.458738	-1.08486	-1.24874	2.05086	0.898331	0.698362	0.650982	0.66694	0.102892	0.156998	0.802272	0.540234	3.48554	0.465578	0.225137	-3.15702
ENSG00000134697	-1.48903	3.08315	2.38629	-0.848215	-0.111762	-0.328043	1.55332	-0.650807	-1.10505	0.895026	0.13116	-1.12884	1.36021	1.89438	-0.111821	-1.82885	0.339881	-0.587604	0.476119	0.178693	0.728381	-1.63176	-1.90715	0.000935796	0.201497	0.200276	-0.963811	0.14748	0.673069	1.2773	-0.102279	0.590838	1.55473
ENSG00000141505	-0.369948	0.112455	1.59978	0.855005	0.645333	-1.15241	-0.618173	-0.777848	1.55444	2.17198	-0.123381	-0.34991	-1.50524	1.14857	-0.452459	1.66352	0.334722	-1.42686	2.41005	-0.709513	-2.19433	-0.267167	0.41945	-1.09462	-0.949241	-0.0973919	2.55456	-0.531924	-2.01758	0.24249	-1.24977	1.1102	0.363298
ENSG00000163879	-1.73053	-0.236284	0.128188	-1.59227	-2.26023	-0.101809	0.247574	0.321807	-0.344369	-1.07552	0.153705	0.550007	0.219628	-0.923097	0.571624	0.690389	-0.517477	-0.192463	-4.25638	1.20324	0.488463	-1.33001	-0.525578	-1.72101	-0.493786	0.724313	-0.487053	-0.435116	-2.89498	3.29246	1.32606	0.056673	0.413192
ENSG00000166557	-0.335114	-0.674412	-0.255563	-0.698637	-1.42328	0.379587	-0.938774	-0.982981	-0.626366	3.66703	4.58412	4.09704	0.542653	-0.0800821	0.526264	-0.23339	-0.374741	-0.532807	-0.677654	0.258823	-0.0752011	-0.527321	-1.36531	-0.504636	-0.00491194	0.0805455	-2.23486	-0.386022	-1.47466	-0.363468	-2.46994	2.15224	-1.31219
ENSG00000133805	-0.0803444	1.01456	0.746957	0.850678	0.736543	3.24479	-1.69703	2.03983	-1.04	-0.526566	2.82128	0.771061	-0.835837	-0.506266	-0.103906	1.07793	-1.50352	0.885853	-1.61411	-0.0362377	4.32691	0.459553	1.56481	0.496266	-0.269127	1.3487	-0.726779	1.05413	-0.667888	0.270754	-0.632139	0.559344	0.0765328
ENSG00000114654	2.66148	-1.06026	-1.04302	2.2678	1.20826	-1.01395	0.835484	6.13596	-1.2064	-5.48411	-1.44994	-0.347258	-0.154838	1.91458	-1.22305	0.161366	0.608553	-1.03972	-3.04304	0.0482518	-0.373504	-0.305359	-0.956356	-0.700317	1.61015	0.722774	-0.273764	0.182342	-1.67345	0.652343	0.748805	-0.587197	3.49291
ENSG00000116213	0.378425	0.464339	-0.810383	1.538	0.460535	0.451015	-1.53453	-0.436221	-3.02857	-2.40304	2.82221	1.78643	-0.418242	0.335938	-1.69011	-0.345406	1.1686	2.54361	-0.0845444	-0.262517	0.360667	-2.73514	-0.478551	0.758452	1.08285	2.56291	2.76169	0.366626	-2.74887	0.125937	0.106475	1.63235	-1.38112
ENSG00000181744	-0.433896	-0.4833	1.26633	0.203174	-4.51311	2.50026	1.31034	-1.11636	-0.106042	-0.941464	-0.15803	5.58181	-3.62009	0.448211	-1.17389	-0.224407	2.10992	-0.982519	-2.85166	-2.06314	0.047786	1.95549	-1.83124	-0.516643	-0.77565	-0.374086	0.380994	0.199257	-0.788147	0.398654	-0.0972169	-0.208777	-1.59577
ENSG00000197780	-0.301001	-0.022686	-0.133499	-0.538365	-2.52332	-0.0772084	-2.04734	-0.940864	-0.3235	1.32765	1.06287	4.01721	-0.32937	-0.458509	-2.83116	-0.19983	-1.16648	2.07333	-2.73711	2.56942	-1.06251	-1.94299	4.06695	-0.550631	-2.75658	2.66481	3.53022	1.23617	-1.05436	0.711114	-1.37145	0.388686	2.13745
ENSG00000078900	-0.496228	1.30409	-1.43535	-0.937782	-0.114317	2.21844	2.10103	0.701329	-0.406145	0.392639	-0.560224	-0.558608	0.189848	4.151	0.327929	0.627077	1.05247	0.396808	-3.40384	-0.0883289	-1.27217	-1.00109	-2.97137	4.43806	0.619868	0.561583	5.39451	-2.52329	-0.598626	-0.330859	-0.44203	-0.583296	-1.62953
ENSG00000198483	0.26402	0.432304	0.256885	1.40521	0.412759	0.337272	0.341605	-0.0791227	2.19676	-0.310198	-3.19259	-2.77771	-0.308977	0.4101	-4.07816	0.815894	0.0530047	0.167103	-0.0861536	0.301032	0.785539	0.341096	0.893761	1.0967	-0.646656	-0.243311	0.082096	0.623566	1.21747	2.36206	0.551005	0.0155651	-0.370074
ENSG00000171703	0.572721	3.15115	-0.768259	0.48661	3.73234	1.77517	0.229463	0.848633	1.58949	1.32994	0.00657091	0.579207	1.98243	2.04861	0.391936	0.834884	1.33622	2.78282	2.15183	-0.157649	0.240855	-0.165356	-1.9706	1.18783	0.536717	1.57508	-0.429039	3.8909	2.57124	-0.168443	1.81197	0.830214	-1.90147
ENSG00000100299	-1.23625	1.59455	0.347853	-0.594147	-2.09196	-0.260231	0.220428	-2.59696	-4.82576	0.771186	-0.794268	-3.88882	1.12719	4.55336	-0.727438	-0.497656	0.893989	-0.0133559	2.98433	-0.284304	0.805204	-0.180015	1.74309	0.736305	1.79375	-3.42318	-0.536345	-0.69129	-2.22864	1.60913	-0.557238	2.30542	4.52537
ENSG00000100083	1.03928	3.59218	3.09994	-2.942	0.538587	4.06895	-1.97373	-0.0595479	0.239952	3.439	2.5103	1.20617	1.50941	1.13212	0.679663	1.23157	5.21965	1.99975	-1.28279	1.20225	0.453542	-0.260018	-1.05525	0.887154	0.893301	4.46108	-1.94957	1.46412	-1.1933	3.78316	-2.34552	-1.04143	-0.783924
ENSG00000169442	0.0302638	0.97304	-0.573402	-1.69194	5.5553	-1.09505	-0.156555	-1.01675	-0.160174	0.677824	-0.14983	0.601176	-2.58956	-0.498816	-0.959367	-0.0701489	-4.20046	1.91607	-2.93061	-1.23685	0.75583	-1.80777	0.112598	-0.136975	-0.528632	-0.478544	0.260968	-0.493287	0.199359	0.514837	-1.15839	-0.283564	2.12362
ENSG00000142669	0.323265	1.51042	2.38607	0.66068	2.05727	-0.963688	2.11388	1.22074	0.488746	0.0789171	1.88211	3.91429	2.46038	0.577765	-1.53606	0.56971	0.613667	6.0022	1.81279	0.673364	0.760276	0.994911	2.01951	0.0392037	0.703177	1.69701	0.918918	-0.855652	4.87876	1.88165	0.418773	0.213654	1.50773
ENSG00000068831	-1.62246	0.582943	-1.05769	0.745892	1.0147	1.31853	-0.568	-3.22267	0.374071	3.99424	0.299383	0.417816	0.525167	1.41883	0.742929	-0.328737	-0.997942	0.128672	-3.72146	-0.46729	0.39426	0.0321398	1.00717	-0.876465	1.32278	0.053854	-2.92202	-1.67837	-3.55632	-0.906038	1.74371	1.64605	-0.60695
ENSG00000135454	-0.394368	-0.510783	1.95636	-0.541868	2.83228	0.217335	2.52671	2.29114	-0.0930862	-0.287075	2.109	0.974797	0.294762	4.48228	1.05154	2.00815	5.32156	1.46853	2.44083	0.958135	1.6928	0.16602	-1.32514	-0.147546	3.20177	-0.452507	1.13152	3.17962	1.85792	0.77402	-0.707003	-0.963736	-2.11749
ENSG00000166073	2.12066	0.536678	-1.04766	1.97182	-0.705871	0.473936	1.65506	0.149843	-2.30493	-1.63266	0.758001	0.754962	0.0430476	1.05622	2.41394	0.328877	-0.00659424	-0.00103007	-3.96823	-0.927577	-1.17469	-1.07437	-0.910984	-0.710375	-0.582808	0.78201	0.720888	0.16364	-3.42158	-0.166162	-2.1242	2.42897	2.68951
ENSG00000139220	1.87585	-0.716179	0.880915	0.807261	0.734721	-3.76671	2.47963	1.07979	0.307517	1.26663	0.456758	2.66164	5.19865	-4.16544	1.80191	-0.318717	1.52501	2.34046	1.7663	2.48175	1.43663	0.38224	3.84755	3.48074	5.21409	2.02087	1.51549	-5.60305	-4.24529	0.00493556	1.82721	0.930519	-0.6088
ENSG00000152952	2.58938	-0.861158	1.06716	-0.561267	-0.685012	-1.20114	-2.97651	-0.823789	-2.95771	0.932591	-1.80694	1.03023	-2.42109	2.14779	-2.09153	-0.389837	0.45329	0.092743	-0.580653	2.7719	1.43154	-1.18979	-0.346575	2.3234	1.98651	1.47739	5.68876	0.328941	-0.8913	0.149534	-0.396758	-0.370952	0.11475
ENSG00000073060	-0.637195	-1.53304	-0.330076	-0.350887	1.35003	-0.420822	0.870889	0.898067	-0.93195	0.683633	-1.18171	-2.08414	-1.48109	2.58004	-0.910515	-0.504399	-1.28462	-0.82642	-0.293254	1.30702	-0.158214	-0.0319516	1.8042	0.652475	-0.385493	-0.204198	-1.39226	2.40676	1.79796	0.315575	0.921741	-0.025007	-1.07094
ENSG00000137161	0.0366673	0.47257	-0.854257	-0.88906	0.647497	0.728294	-0.845942	0.323812	-0.417469	-0.981185	0.290784	-0.237286	0.146073	0.172402	-0.0307571	2.23834	1.17446	-0.628841	-1.84579	2.21858	-1.31686	1.61565	-2.25071	-0.330764	-0.700483	1.09117	-1.33422	1.15449	-3.81052	1.0607	-0.389145	1.26761	-2.61644
ENSG00000161082	-0.418102	0.64477	1.52895	1.02071	-3.75825	0.630711	1.89239	1.79169	1.75349	0.172153	-3.56748	0.157351	3.9546	0.455098	0.0500318	-1.22729	0.63532	-0.547357	-0.836858	-0.395519	-1.80342	1.26691	0.948795	0.311703	1.01209	-0.517871	0.632588	1.24957	2.17961	0.447786	-3.9947	-0.682554	-1.5467
ENSG00000135502	-4.05489	-0.471288	4.86388	-0.800304	1.45379	0.520128	-1.23104	3.89437	-2.6703	-0.343042	2.94936	1.34901	2.29358	3.45491	0.619203	3.53662	1.04177	0.207602	2.1511	1.8618	-0.415894	-1.63246	0.407531	-1.35074	4.37967	-2.09518	-2.32557	1.21678	1.23119	1.51929	0.425277	2.13596	0.737399
ENSG00000124587	2.06807	1.10874	-0.18668	-3.70739	0.381794	1.04069	0.160146	4.19285	2.04869	0.706493	0.733747	1.0616	-0.0212526	0.575055	1.4387	0.59038	-0.317759	0.0884824	-1.17047	-0.510928	-2.58559	-3.20133	-1.40553	0.325189	-0.0326325	0.370889	1.75044	0.31799	0.668794	0.302983	0.526177	-0.144463	0.181685
ENSG00000122547	1.20661	1.25722	1.88579	-2.48547	2.80003	-0.745005	1.07593	0.039065	0.508093	-2.38909	-1.02183	-1.80227	0.736942	-1.34571	-0.666704	-0.466902	2.22576	0.470381	-0.413891	-0.194062	1.23389	0.441439	-0.3149	0.488195	-0.0703222	1.21634	0.198753	0.374585	1.32452	-5.29971	0.670826	1.04765	-0.440487
ENSG00000105397	-0.596428	-1.57692	0.828587	-0.612041	-1.90962	1.95739	-1.3647	-0.658244	2.96458	-1.80599	1.21061	1.8447	1.68745	2.92561	0.823839	0.0355856	-1.67956	3.57501	0.645782	1.87819	1.724	-4.93199	-0.0704451	-0.771068	0.105629	-0.978728	-0.492759	1.01131	4.97235	0.203684	-0.95877	1.68182	0.561933
ENSG00000062524	-5.22275	0.295542	-2.75429	-3.15774	-1.50878	2.18117	1.58051	-3.33943	-1.08998	-2.02296	-3.21822	-6.74079	-1.71644	-1.60727	-0.0688662	1.431	-4.92351	-0.0782714	0.271414	2.14059	-0.884246	-1.80756	-0.760366	-1.04161	-1.55615	1.02834	-2.75012	-1.54894	-2.80899	-0.607941	-1.05568	-0.295928	0.281568
ENSG00000180096	-0.729201	0.318402	2.47824	1.88964	3.52083	-2.39958	1.89404	0.731372	3.80386	-1.75565	1.80526	2.04927	1.84026	-2.76175	1.93122	0.991267	-0.330294	1.24236	-0.157554	0.40514	-2.67467	0.591509	0.246352	-0.688524	-0.403843	4.51647	4.51599	-0.0473997	-2.21108	-2.50849	-1.50632	0.275694	0.738292
ENSG00000136267	-0.666369	0.180159	0.960905	-0.413298	5.03704	1.00733	-0.119187	3.98763	6.70748	0.502224	0.0560282	-0.159171	0.257096	1.51727	-1.63945	0.457581	2.77634	-0.840448	-0.231159	-0.286107	-1.73992	5.02045	-0.78511	-0.612947	-0.244122	0.295198	0.138778	1.44695	-0.0982099	-0.38845	3.08182	0.332645	-3.45486
ENSG00000175463	-2.23484	-0.39243	3.21819	-0.169085	-0.327799	-1.83727	-1.04281	1.58647	-0.692536	-0.702042	0.860871	-3.80487	-3.38848	0.251107	-0.256081	-0.280372	-1.23308	1.78221	1.33726	-1.02231	0.940927	0.650144	-2.04167	0.705095	-0.00332714	-0.101395	-0.117083	-0.653221	0.949427	-1.6015	-0.450209	-0.87147	1.97812
ENSG00000152795	3.36712	0.707169	0.180474	0.203449	0.848229	-1.52224	2.22099	-0.827461	3.98524	3.47142	2.64817	0.479316	-0.0531145	0.787771	-1.32733	-0.455578	1.21993	-1.35561	2.62588	-0.251637	-2.15522	1.17708	3.5137	0.414437	0.0768634	0.135404	-1.34213	2.90946	-0.113472	-0.522137	0.28543	0.505975	-4.50113
ENSG00000158966	0.663311	0.822389	-0.604236	1.86521	-2.58282	1.20093	-2.57364	0.368222	-1.99733	1.69763	-1.07312	1.55901	1.67118	0.332209	0.0749074	5.37239	0.70578	-3.95292	-0.296182	-0.227708	1.61191	1.30502	0.817042	0.689379	0.754239	-1.06681	0.0995765	0.801602	0.491381	2.38833	1.24915	0.787817	0.738218
ENSG00000182621	0.143982	0.0336875	0.545734	-2.41445	-0.379929	-3.47221	-0.618215	0.620311	-3.23315	-1.01836	0.560249	1.49597	-3.49423	2.51576	-0.898738	0.737378	-4.55668	1.1672	-0.946786	6.55845	-2.90287	1.43662	1.91988	-0.336678	-2.28972	-1.02975	-0.580198	-1.43619	-1.83452	-1.37832	-0.613753	3.86847	2.03558
ENSG00000149926	1.01357	-0.551375	2.18652	-3.97611	-0.942333	2.82156	1.54754	1.34542	-1.24972	2.01626	0.618505	0.270251	2.12042	0.592186	0.973274	-0.745366	0.156284	5.54427	3.15694	-1.82712	1.4714	-1.81103	-0.979074	-3.14593	-1.06557	0.766937	0.561816	2.44274	-1.57275	1.96143	0.51143	0.0897157	0.29825
ENSG00000111670	0.173095	2.47589	0.262204	-2.13751	-0.999697	3.97396	-0.621828	0.669203	1.27744	1.02646	-0.516197	-1.25582	-0.529521	0.578411	-0.177525	-1.62785	-1.58648	3.63144	-2.30727	-0.874065	-1.3549	-1.67213	-2.66841	1.3361	3.07781	1.63079	-1.80566	-0.336329	-0.276941	0.614959	0.592929	0.630468	-2.56924
ENSG00000136068	-0.910677	0.722181	-2.74618	-2.75106	-2.23138	-0.821886	1.4365	1.0332	-1.58789	-0.648062	0.614163	-5.74221	4.78892	0.05953	-0.70987	-3.65406	0.580263	0.643844	0.0523381	0.652789	1.37948	0.632787	0.248177	1.66376	0.115354	2.6675	0.0437054	2.86669	0.850822	0.358852	-0.448269	-0.508714	-0.40723
ENSG00000067057	-0.0304389	-0.367331	-1.83141	0.643709	-0.2523	-3.41209	-0.573779	0.357047	0.0409202	-3.66435	-0.42134	0.0885918	-0.028039	0.166401	0.316117	0.132341	-0.553072	-1.406	2.76944	0.229877	0.851708	-0.997864	1.46816	-0.88112	-0.60746	-0.215071	-0.332218	0.143638	0.131712	-0.971088	-0.384113	1.63635	0.374719
ENSG00000197901	2.45714	0.0853478	-1.9137	-2.43671	-1.05599	-0.409849	-1.07919	3.89509	2.60472	0.957805	0.046267	1.83063	-1.26938	0.55223	0.321387	-3.84953	0.337116	0.0299331	-0.70162	-0.16359	-1.80061	-0.148011	0.291861	-1.81779	-0.611756	0.0136328	-1.12203	0.868024	1.87126	-0.24426	-0.113038	0.0977846	-1.6772
ENSG00000204334	-0.935892	1.24307	0.426692	1.18626	0.896814	5.10728	0.205706	-3.9834	1.26537	-0.530928	-0.610856	1.75345	-0.156305	-0.567931	1.04856	-0.26369	0.521677	0.757458	-0.0558494	2.81763	3.52261	0.306077	0.470402	0.452562	-2.35561	-3.08986	1.01281	0.664044	0.706107	0.935292	0.0770714	1.29637	2.35013
ENSG00000183049	1.01956	0.995118	0.733754	0.120345	0.227183	3.11675	3.75297	1.95022	1.57994	1.34796	0.378706	0.299652	0.525878	0.478824	-0.0819803	1.07591	3.18631	0.712322	-0.24251	0.395933	-4.50865	3.62384	-3.01549	0.0806289	1.15844	0.0901951	3.96759	1.88187	-2.16212	-0.308983	4.78354	0.732973	-1.36664
ENSG00000143942	-1.49995	2.59281	-1.86809	-1.43688	2.55729	-0.848742	3.57799	-1.2613	-1.35442	0.153619	1.2791	-1.64044	-1.77129	-0.468278	0.648338	0.689967	-2.63616	1.20018	0.550356	-1.75477	-1.32055	-5.98362	0.100031	0.288928	-1.51404	-0.472996	-1.06645	1.2565	-1.95705	0.295882	0.425816	1.86713	-0.93575
ENSG00000105675	2.80788	0.674298	0.239808	1.84383	0.835242	0.274457	-0.540348	0.0960879	0.536014	0.631745	0.0199898	-0.319773	-0.25002	0.456239	-0.00466588	-0.029045	-0.20068	0.0876934	0.0629188	-1.51883	0.369493	0.21266	0.195908	-0.220465	-0.096556	0.0795243	-0.0710852	0.117559	0.347657	-0.715083	0.119555	0.0117744	-0.0171068
ENSG00000134077	4.96676	-1.78446	-0.198635	-0.615953	-0.983138	-3.4307	-2.00996	-2.13896	2.44704	0.640758	-0.744287	0.388607	0.301636	-0.305817	-1.32165	-0.144269	-3.68052	1.21619	-0.448009	0.169794	-1.43382	0.541579	0.319216	0.1915	-0.233514	-0.71422	0.757706	-6.20682	-0.236372	-3.75344	0.575939	0.233856	1.46755
ENSG00000163430	0.255694	0.328241	-3.33412	4.09201	-3.05573	0.961377	3.97692	-0.19672	0.559994	0.617521	2.76701	0.772646	2.33928	-0.0847029	1.10772	-0.641729	-1.00879	-1.78747	1.99387	-2.14844	-2.7856	0.823784	-0.40595	1.144	-0.259128	3.72561	-1.26858	2.12265	-1.766	-0.794871	0.639829	0.279344	2.99763
ENSG00000110315	-1.40449	-2.18372	3.05701	-0.0425983	0.427844	0.128648	1.43341	2.09159	-0.981443	2.65154	0.673098	0.717436	-0.105855	1.31278	0.418457	1.86357	-0.535315	0.169646	2.10429	0.662981	0.0572417	0.0978836	-0.0743223	-0.0639845	-0.456508	-0.556034	-0.238221	1.3762	-0.616588	1.67695	4.33414	0.718678	-0.871735
ENSG00000007171	0.515892	-0.0500279	-0.0411836	0.33675	0.55822	-0.214233	-0.0169876	3.18141	-0.0791345	-0.226624	2.15207	-0.496941	-0.320509	0.315619	0.839767	0.12648	-0.507772	0.511262	-0.317427	-0.461983	-1.53886	0.159529	-0.425615	0.515449	0.354112	0.196705	0.426812	2.73369	-0.766118	0.284123	0.125968	-0.0760846	-0.0453235
ENSG00000163701	-1.42667	-5.38815	-0.334183	-1.99386	-2.01925	-0.579228	0.222347	0.390305	1.32833	0.382918	-5.4043	0.83639	0.833819	2.60089	1.98316	-2.25497	1.53614	-1.55223	2.37357	2.17751	3.18023	-1.47485	-1.54329	-0.390201	-1.37812	-2.26921	-0.329077	-2.0159	-0.701476	2.69541	-1.03772	-0.683895	-2.56332
ENSG00000166862	2.72294	0.46271	0.701036	1.97364	-0.232405	-1.15386	3.88229	0.0611568	1.22034	-0.16067	0.171207	0.468278	-1.66039	0.403903	1.32159	0.43091	-0.389888	0.597188	-0.238437	-1.59547	0.225252	3.17069	-0.498352	-0.351225	-1.32494	-0.719883	-0.00938704	2.31696	-1.02777	-0.410082	-0.585496	-0.0667838	2.9681
ENSG00000070785	-0.455046	0.285306	0.704783	-0.499731	-0.0780067	-2.75823	3.33719	-1.15375	-0.474184	-0.185215	-0.536533	-2.01961	0.290258	-1.22266	-3.29602	-1.23584	-3.84551	-0.165892	0.0814291	1.95765	0.0669149	-1.37199	0.173859	2.32375	0.816778	-0.783757	-0.463081	3.14019	0.07799	1.74948	-0.23178	-0.212225	0.301911
ENSG00000166839	-1.39234	-0.497305	1.70344	1.41846	-1.26502	-0.651033	0.657215	-3.53575	3.42455	0.20013	-0.628518	-0.298837	0.191309	-0.215141	-0.564887	1.36853	1.38958	-2.04335	-3.17213	-1.1388	-0.554106	0.868854	2.42624	-1.28831	-0.835479	-0.778843	-1.49161	1.33833	-1.22546	-1.8058	0.118062	-0.37193	3.71009
ENSG00000143878	-1.59076	0.521216	-0.0566022	-2.29874	0.0562741	1.74613	-0.908705	2.54242	0.274435	-0.864557	3.69014	2.53934	-6.19715	0.920162	0.510866	5.99769	-1.30039	-1.23196	-2.2673	0.0565584	-2.31244	0.298298	-2.15196	0.572108	1.41626	-0.409248	-7.4537	1.62259	-1.36891	-1.10102	4.71981	0.440557	-2.30014
ENSG00000174948	0.858868	0.865468	0.37878	1.20568	-0.534125	0.0738778	-0.374458	0.461638	0.946403	2.83433	1.01616	0.677176	-0.865644	-0.273936	-0.977426	0.38847	0.170453	0.066755	-0.564557	1.0804	2.58694	1.28826	-0.439192	-0.142713	0.326373	1.01981	-1.89339	-0.84926	-1.0798	0.330741	3.77916	2.52585	-1.1612
ENSG00000132671	-1.67317	-3.64237	-5.55087	-3.37863	0.979043	0.0520079	0.382897	1.16832	0.383247	-0.0997666	0.0243401	-0.247159	-0.0199151	-1.37764	-0.574576	0.776105	0.726682	1.89985	2.59815	-0.958219	-2.10433	-1.68704	0.489787	1.81062	-0.266281	-0.631122	-0.158876	0.447035	1.09025	0.916025	-0.321383	0.0641562	1.15607
ENSG00000178726	-2.69862	-0.776092	-0.207153	-4.26012	-1.02706	-2.0363	-5.45683	2.10273	0.571876	0.272002	1.20377	3.41287	-1.51842	0.663158	1.13497	1.6446	1.9935	1.84596	-0.545134	-2.85877	3.14644	-0.480839	-0.559181	-0.42653	-2.16187	1.41115	1.8131	3.73571	3.0261	6.40707	1.88079	-0.44001	-1.85858
ENSG00000138207	-4.55782	-1.36327	0.440247	-2.23307	-0.71802	-0.372122	-0.0679055	0.0404228	2.18286	-0.308665	1.16879	0.255636	-4.06403	-0.477786	0.551363	2.05103	-0.718809	-1.76863	0.679645	-5.03755	-2.43637	0.274411	0.637086	-0.296468	-1.31026	-1.80817	-4.27413	-0.261363	-1.07097	-0.2221	-3.08138	-1.01029	-1.85294
ENSG00000198189	-0.842701	1.57426	-0.791103	0.419312	-0.288461	3.38214	-1.07489	-2.84302	-1.07267	-3.60103	-0.55865	-1.06676	0.892695	-1.23744	1.0296	-1.91757	-0.245961	1.81983	0.714392	1.15951	0.193728	0.592536	-0.350794	1.7429	0.753662	1.1832	0.724234	1.06386	0.313306	1.32895	-0.927609	2.98485	0.543954
ENSG00000198901	-0.358925	0.220741	2.10527	-1.37313	0.617838	1.81346	1.02861	1.53714	-0.639938	0.243085	1.46587	5.07722	2.95028	0.76925	-0.410207	1.98001	4.09159	1.6267	2.59995	0.87786	4.59048	3.74603	1.67503	1.47105	1.29006	1.93109	1.50518	-1.27142	-0.236788	1.02089	-0.587126	0.416373	1.5564
ENSG00000186188	-2.09801	0.856157	-0.442528	-3.13318	-1.08127	0.536837	-2.86417	-2.49573	1.10003	0.192907	0.0606272	0.354815	1.22409	-0.760501	0.642293	0.0726027	-0.293373	1.4852	-1.50031	-0.0752734	-0.265308	0.355521	0.183944	-1.3263	-0.678377	0.650508	-1.15221	1.3848	2.87926	-1.45238	-1.31346	-0.811078	2.58673
ENSG00000197860	-0.962339	0.52285	1.03349	-0.840385	1.3674	1.04772	-2.25178	2.19438	-0.0803403	0.0128462	-1.55932	-1.75067	0.366009	1.30368	0.358399	-1.36149	0.87068	1.31087	-3.77408	1.49841	3.65129	0.438205	-0.559683	-0.449457	-0.290541	0.615202	-3.55456	-3.80771	0.576563	-0.694042	1.67496	-0.111002	-0.79132
ENSG00000171408	4.97705	1.33081	-2.31412	0.419137	3.49143	0.424156	0.00869009	-0.218036	2.39706	0.847456	0.942679	-0.103764	0.796938	1.27076	0.830938	0.617782	0.963254	1.10536	-1.26594	-0.529783	-0.281605	-0.421066	0.590356	0.149655	-1.51784	0.728235	0.33272	0.50057	1.1342	-0.75687	0.849444	0.828952	-1.76384
ENSG00000115457	1.41829	2.5396	0.925955	-0.0375757	0.179717	1.80682	4.82639	-1.95413	2.29709	0.803607	1.06324	-0.435384	-0.466221	4.97415	0.663807	-1.31488	3.61079	1.50996	1.51243	-0.772521	0.491698	1.68406	2.81618	1.7714	-1.03524	-0.340404	0.42351	-0.720975	0.440761	1.6745	1.23873	0.261534	0.0326866
ENSG00000162434	1.31194	-0.182654	-3.54882	1.21746	0.587722	0.235414	-0.998327	0.734658	0.0473772	-4.54623	0.0336673	-0.196626	0.702812	-1.23349	-0.0609745	-0.702093	-0.785799	0.555478	0.176655	-0.277394	-2.9279	-0.456683	0.606791	-0.26954	-0.438374	-0.35961	-0.307826	0.597459	-0.692189	4.29764	1.51062	-1.3343	0.406645
ENSG00000111452	-0.917044	3.57067	1.06234	0.0418813	-0.145551	0.0197937	2.0878	0.896141	-1.30481	-0.652198	-0.156768	0.442234	1.55119	1.09302	1.60127	-1.00655	1.36071	-0.218638	-1.50225	1.22277	0.3956	1.00828	-0.0635708	0.539425	6.90892	-1.05854	4.66615	1.78354	0.887898	1.00691	-0.381618	-0.842136	-1.38835
ENSG00000251322	-1.33813	1.08764	-1.97043	-0.897012	2.79271	4.22166	-1.40803	1.30155	3.45439	2.21399	-1.22473	-0.649775	-1.0575	-1.50465	0.719585	1.60026	-0.327421	1.55079	1.59969	3.30783	1.22298	-1.54192	-1.19048	1.11538	1.31462	1.66631	2.21083	0.351585	2.65625	-0.668327	1.06898	-0.130525	-1.15355
ENSG00000118257	0.201687	-5.36319	-0.182141	-0.584451	-0.443003	-0.680555	0.126298	0.388075	3.55906	-0.8288	0.892218	0.510961	-1.35259	-3.78515	2.78663	-0.694481	-3.40017	-2.67274	0.968259	0.0523058	-0.194964	0.25617	0.100384	-3.3522	-2.33668	-0.33561	0.191453	2.07597	-0.160024	-0.173005	1.95515	0.723276	4.64487
ENSG00000142675	0.0300309	-1.89741	-1.18101	-2.51669	-0.233004	3.84687	-0.912677	1.32154	0.853769	0.15132	0.604951	0.865008	0.591633	0.84412	0.141645	3.46779	-1.4704	0.0583502	1.13759	-1.2302	0.993374	0.486831	-1.11243	0.351494	0.258653	2.7285	-0.604614	0.227159	-0.536466	2.61335	0.52661	0.813168	1.71184
ENSG00000158623	0.90268	5.49953	3.39455	-1.87671	0.971964	0.529181	3.38439	1.07902	1.58304	0.0497592	2.97417	3.5052	0.79989	0.604989	3.02502	-0.395471	-0.304681	1.28411	1.52931	1.72042	-2.65444	1.11105	1.45285	0.685931	0.328049	1.14034	2.56375	1.89067	-0.903513	1.85873	0.162032	0.0075172	0.801448
ENSG00000110900	0.603745	-1.52199	0.919321	0.769254	0.024544	1.22304	0.0752155	1.48572	0.888952	-0.207951	-2.70449	2.10356	-0.0600708	0.235729	0.289277	1.24626	-1.57869	0.351356	1.85457	1.85796	0.398684	-0.645504	1.24324	0.151599	1.70122	0.994161	-0.581158	0.155848	0.97302	-1.02842	-0.375681	-1.76502	-2.23886
ENSG00000162714	2.64083	0.669769	4.50288	3.87559	1.16068	0.398827	0.0531197	2.0169	1.23438	1.13495	0.936098	-0.310521	1.75209	-0.594588	2.51563	0.581796	-5.51772	1.47355	0.748166	0.787419	1.44743	4.49554	0.506308	3.53704	3.95132	1.88913	-1.24085	2.17232	1.40098	-0.353302	0.107823	-0.365386	0.804466
ENSG00000135503	-0.287629	0.064994	-1.13018	4.02109	0.500788	-0.0504435	-0.88352	3.69535	-1.35583	0.501048	2.04556	0.416562	-0.0252289	1.10239	-0.0419138	0.602522	0.00243448	1.28665	0.925507	-0.0169812	2.76411	0.48282	-4.05973	-0.3171	0.14926	0.348699	-1.21924	3.1708	0.0193075	-0.203605	-0.373357	-3.81906	-1.58447
ENSG00000162437	-0.839799	-0.596312	3.78847	-0.454422	-1.27203	0.261998	-0.754022	0.728144	3.37587	-1.94951	0.93896	-0.83394	-0.421159	0.0465231	0.388838	-0.312651	0.865563	-1.92571	-1.37514	-0.589573	-1.16944	-0.953402	0.588886	-0.911955	0.0870921	1.54382	-2.23856	1.48063	1.20094	-4.9759	2.59316	1.07599	1.10672
ENSG00000035664	-4.6961	-0.44012	-4.06355	-0.490536	2.72361	0.874213	-0.116583	-0.279794	-1.10336	1.76636	-0.945131	-1.15286	-1.57126	-2.01127	-2.75528	1.58233	-0.235506	0.0565703	1.40478	-0.190604	2.82651	0.120109	-1.15893	-2.53424	-1.48176	0.880713	0.644133	0.583592	-6.43461	4.13891	-3.49622	-3.12579	0.256818
ENSG00000004399	2.24315	1.95096	0.697317	0.103728	-3.84237	1.79303	1.51919	0.910247	1.31928	0.561419	0.167258	1.57773	0.90859	0.102626	1.58581	1.25402	1.17515	-0.808909	0.0938386	0.164347	-1.62131	0.356384	0.192175	-0.390779	-0.282316	-0.375666	0.413793	2.94337	0.187886	-1.22069	0.552401	1.50433	0.512488
ENSG00000275700	-0.159637	0.392922	-0.348505	1.63925	0.445377	1.36265	-1.00264	-1.35515	-0.604639	-1.8524	0.846789	0.87944	0.0170991	0.136194	0.633434	5.61419	0.916542	0.514582	1.1758	0.0482647	-0.0741605	0.145167	0.47531	-0.849213	-0.646024	0.668726	3.72147	0.780055	-2.34401	1.90305	1.30194	1.46714	0.584122
ENSG00000101349	0.693934	2.24551	2.86648	-1.14911	1.47189	3.70249	1.70379	0.606232	6.21991	0.704274	1.2299	0.315651	-1.94076	3.92142	-1.5228	1.23724	1.94222	1.50881	1.17334	-0.72326	-0.369193	0.871226	1.70852	-0.0612049	-0.420296	0.554982	-0.943864	1.72383	-2.64157	-2.95794	-1.35543	0.764689	0.908819
ENSG00000175471	1.7316	3.01778	-1.86408	-3.70728	-0.922585	1.09407	1.39142	0.58103	3.137	1.30607	-1.35096	-0.657668	-0.266341	0.686479	-0.719819	-1.69452	2.30859	0.195823	-0.594223	0.539868	-5.29846	1.30745	-0.631301	0.109872	-0.347503	0.815675	-0.0178168	2.35398	-1.5014	0.359851	0.627791	1.39187	-1.45518
ENSG00000102802	0.397771	-1.90857	-1.81083	0.728605	0.253188	-1.3261	-3.02609	-1.83718	-0.823459	-0.546205	-0.946757	0.0574373	-2.52975	-1.89895	-2.9125	-0.409041	-0.105961	0.145798	0.358221	-2.42723	1.93757	1.82006	0.268419	0.434274	-1.97974	-0.522469	-0.496562	3.45015	-3.19476	0.322749	-0.25952	-0.290707	-0.143547
ENSG00000175664	-5.92458	1.23848	0.750092	-1.05175	-0.952812	-1.92785	-0.901048	-0.856412	0.403594	-0.84514	0.0361991	2.54764	0.377716	-1.0868	1.40492	2.21034	-1.64793	0.709714	-0.232324	-0.972953	0.258961	0.76415	-0.395021	-2.42312	-0.148628	0.264924	-0.211709	-0.84962	1.39392	1.20212	-1.87405	-3.31187	-1.17989
ENSG00000141456	3.52733	2.45132	0.57308	1.83239	0.122032	-2.75532	-0.847935	0.080964	0.307029	-0.0861315	3.23228	-1.98192	1.2585	-0.838165	-0.166974	-5.20189	0.180658	-0.58807	1.77768	-0.599771	-0.149941	1.07245	-0.872926	-0.33046	-0.297746	2.94414	-0.597851	2.96503	-2.68822	1.00464	-1.00144	2.88055	-1.62607
ENSG00000162913	4.77727	0.945695	-1.08997	-2.0591	0.392152	0.026719	0.576898	1.60803	0.204243	0.718189	-0.203363	-0.253666	-0.508351	-2.41469	0.509633	0.578105	1.00008	-0.578658	3.09551	1.17704	5.64045	0.624687	-1.11856	2.7805	1.48085	1.11278	-0.063822	0.663754	2.88177	-1.27372	0.563569	0.842241	0.733416
ENSG00000187595	-0.0214428	1.0031	1.02249	0.831508	-0.512927	0.411905	0.269787	0.438138	1.44061	1.89354	0.346635	-1.07131	-0.804977	-2.04866	-5.54021	0.281458	-1.04936	-1.02294	-0.116842	-0.458984	-1.48761	-1.73346	1.48585	-1.39529	-2.28085	2.82732	1.93129	1.1783	-0.343162	0.60086	-0.400668	0.906493	-0.0855861
ENSG00000154358	-0.138717	-1.9674	5.01589	-0.807368	-0.0793642	0.65056	-0.0987702	1.05764	2.13942	2.35862	1.286	-0.480116	1.33922	1.79882	2.33631	0.437874	0.764849	-1.16986	-1.77701	1.10467	1.17371	-1.81364	-2.00477	0.860443	0.62912	0.836048	-0.246812	0.59276	-1.5505	-1.37158	0.325564	0.515231	1.23621
ENSG00000168259	-0.135784	-0.168485	-0.112976	1.39593	0.528706	-0.87911	-0.159326	-1.98871	-0.777174	-0.685557	0.291925	0.370531	-0.675126	-0.629125	-0.345352	0.48365	-0.673447	0.0284033	-0.162542	0.0621525	0.801598	0.104803	0.369606	-0.942458	-0.973531	-0.324909	-0.13803	-2.07254	0.0240464	-0.569949	-1.68656	-0.467294	2.25566
ENSG00000204252	-3.06979	-1.60579	3.7875	0.218505	-2.24541	-0.168977	-1.34362	2.85587	0.846947	-0.631075	-0.780448	0.141904	-2.47308	-2.07176	0.0816161	0.418609	4.01675	-1.00072	0.175413	0.89141	-0.199292	0.851629	2.67711	-1.9785	-1.70035	-0.526696	-1.06576	0.333636	-2.55682	0.143521	0.444918	1.2267	0.295269
ENSG00000131969	-0.628215	-0.134014	-0.46194	-0.185951	-1.29536	-4.25116	0.730871	-3.60711	0.711365	-2.38429	-1.16048	-0.248873	-0.680823	0.149271	-0.0571629	-1.04011	-0.792944	-0.289113	1.77794	0.195634	0.57761	2.67473	-0.482994	-2.60917	-1.12998	-0.252091	0.0261125	0.0828289	0.0627744	-1.0556	-1.72794	-2.05322	-1.25295
ENSG00000144231	0.287315	0.45079	0.0220821	0.275335	0.0604922	1.0744	0.542217	0.23175	1.3395	-0.117573	1.3194	-0.607819	-0.33174	-0.215373	-0.139263	0.36602	1.14801	-0.188576	-0.367505	-0.414721	1.05509	1.45192	-2.02322	0.154659	0.303173	1.28275	0.86934	2.47549	0.150856	0.140605	-0.237463	0.0437339	-0.97106
ENSG00000151468	3.98257	4.34214	0.39236	0.587569	3.61649	0.610064	-0.069658	2.77055	-2.72779	-0.432624	0.651716	0.156357	4.82063	1.05738	0.678552	2.05922	0.50198	1.21804	-0.344507	0.0902138	0.413047	1.40148	-2.28865	1.21794	0.835567	0.848972	0.6465	0.52378	1.47055	-2.4919	0.0794622	-0.0656318	-0.042331
ENSG00000134250	-2.75021	-1.504	-6.51214	-1.8146	-0.968844	-1.5021	2.08545	-2.11931	-0.526722	0.0546637	-2.81222	-0.446703	-0.930048	-2.77857	2.07657	-1.45149	-1.52819	-1.38304	-0.886814	-1.69145	1.25261	-0.748876	-0.615338	0.216661	0.387363	-1.11566	-1.27815	-4.2043	-0.0707059	-1.52225	0.631571	1.24525	1.06395
ENSG00000100504	-2.98935	0.664837	0.524875	0.469845	-0.268069	1.17431	1.29962	0.825237	1.58788	-5.36534	-0.589867	-2.17941	1.11869	-0.592581	4.23099	-0.222268	1.34828	-1.73914	1.12095	1.8584	-1.74382	-0.48464	-3.0679	0.450549	0.349303	0.218009	0.212499	0.786756	0.469133	-1.60099	2.37796	-1.15897	-2.55052
ENSG00000065518	-1.12779	-1.65654	0.416784	-0.683415	-2.18091	0.298532	-0.956497	1.2672	0.0636197	-2.4614	1.8312	1.46369	-2.31329	-1.6346	-0.0250683	-0.603637	-0.512844	-3.93221	0.98375	-0.871158	-0.149281	2.4286	0.9531	0.340269	0.398815	-0.598243	-3.05106	0.484564	-1.8208	1.33376	1.01971	-0.839945	-0.768323
ENSG00000114279	5.53374	0.534334	0.83208	0.194882	-0.0983514	0.928576	0.588448	1.70205	1.14006	1.71984	1.22846	0.221759	-0.339148	4.18607	0.562129	0.176129	0.0832323	1.39358	0.511747	0.485886	0.0124632	0.789319	-2.98084	-0.126643	-0.762192	-0.195323	0.108247	2.34842	-1.04179	1.01115	2.40441	0.520533	-3.09873
ENSG00000152154	-0.450351	-1.32311	-2.43257	-1.51667	-2.16237	-0.0184172	0.00121879	-0.451021	-1.03904	-0.126346	-1.89534	-3.8578	-3.42388	-0.0393261	-4.99118	-1.68029	-1.84965	-0.459027	-0.152486	1.15456	-0.0826977	-0.404785	-0.791186	-2.01967	-1.64665	-2.00212	-0.113852	4.22763	-4.62265	-1.6517	-0.457072	0.178112	-1.85209
ENSG00000110841	-2.63114	-1.76659	2.98105	-0.0630776	-0.853802	-0.489516	-1.37992	-0.948837	-1.14912	-4.20617	0.991015	1.83251	1.2323	0.141381	0.665416	0.0359507	0.439036	0.877796	-1.50252	0.685461	-0.951786	5.5591	1.53076	0.0734148	-2.84199	2.36206	1.38544	1.54805	0.111906	0.1984	-0.38514	0.586166	2.60041
ENSG00000135622	1.09939	1.47388	-5.12709	1.55666	2.39611	3.05169	-3.21486	2.01498	-0.947717	-0.374247	4.91045	-3.08417	0.801276	2.04095	2.77926	-4.73335	-1.45535	0.969319	-1.61318	-1.90082	-0.994937	7.48623	0.620525	2.02666	-0.822631	-0.0143819	-0.0219299	-1.69787	-0.356694	-0.229573	-0.847042	0.186187	-0.585808
ENSG00000115461	-3.50231	-0.149701	-1.04142	-7.53116	-2.35929	2.59404	0.686376	0.352792	-0.968524	-0.131191	0.189576	2.15846	2.06131	-0.047477	3.06353	-0.669203	0.317156	5.03403	0.633409	0.657713	1.42166	2.09363	1.03584	3.81253	-0.745009	2.0245	0.623864	0.774833	4.78882	-0.156872	1.87279	0.68554	1.38669
ENSG00000133302	-0.337642	1.28581	-0.276897	-1.74452	2.69829	-0.121844	-1.63456	0.660127	0.877461	-2.27784	-0.407117	-4.137	-5.52692	3.26419	-1.66597	-0.545883	-0.073904	0.766972	3.27734	2.17638	-0.651632	1.9918	-0.231065	-0.45339	-0.961599	-1.97419	-4.48444	1.65246	0.42476	-1.90429	-0.819517	-0.685828	-1.59748
ENSG00000132639	-1.34058	2.01145	-0.0683507	-2.8937	3.4744	1.1032	0.0465603	0.826832	-0.546914	-0.626691	2.18397	1.70174	0.707999	2.34749	-1.02537	1.89525	0.596118	1.26121	0.67129	2.96941	-2.11841	0.401802	-0.16158	0.561463	0.19274	1.28502	2.99354	10.104	0.823413	-4.72263	0.20823	3.58647	-1.65427
ENSG00000249242	-2.35878	-0.822063	-2.84727	-1.5803	-0.75473	-1.06146	-0.18617	-0.920455	-0.532537	-0.173653	1.19526	5.35399	-0.533231	0.663314	0.590845	-1.56707	-0.778587	-0.620785	0.513606	-0.0966425	-1.38676	1.22894	2.71447	0.403855	-0.713862	-0.700723	-0.205025	1.77442	0.737342	2.59377	0.341133	-0.410209	-1.51423
ENSG00000073754	1.5104	1.21786	1.69879	0.877951	2.47887	0.403865	1.17965	0.374599	2.73601	0.950308	0.51577	-0.374428	-1.10255	-0.443105	0.441429	0.644888	-2.51663	0.415575	0.282346	0.480624	-1.15557	0.633073	-0.186792	5.06849	3.83645	1.23978	0.354354	0.533843	0.833443	-0.49328	0.254872	0.206168	-2.22994
ENSG00000072778	0.745168	-0.0233418	-4.55894	-0.0368153	-0.934536	-0.909263	-1.59707	0.683894	-0.0956463	0.345977	-3.07858	-0.348642	1.24546	-2.0287	2.15216	2.25093	1.61195	-1.83577	-0.263146	-3.3808	-0.87926	1.00481	-2.62755	-0.340842	1.44496	0.754578	-0.337882	-2.43874	2.17976	-0.955536	-0.345797	-1.83249	-2.18212
ENSG00000131669	0.527517	-0.84958	0.194787	-0.17604	-3.70144	0.00365938	1.51962	0.128344	-0.866018	0.041261	-2.02039	4.63734	0.397286	-0.487573	-2.71686	0.868353	2.51228	0.308095	0.566211	0.812521	-2.39638	1.20701	-0.915425	1.38482	-0.260905	-1.52348	3.19566	-3.1442	-0.0158255	0.664696	-3.37917	0.0656899	-1.06203
ENSG00000179902	-0.199592	-1.97159	-1.53226	-1.42687	-1.06695	-2.60223	-0.933588	0.175547	-1.20181	-2.59883	2.40032	0.800956	-0.0748153	-0.573631	0.687649	0.542117	-0.333265	1.07446	5.53041	2.09812	-0.659268	-0.0405223	-1.09224	-3.51285	-0.776781	2.97531	-0.332375	-0.86113	0.836078	1.3163	-1.10854	-1.92054	1.46319
ENSG00000137070	1.44494	1.52028	0.137501	-1.18562	0.126302	0.315254	0.826235	2.96846	1.27227	1.08737	-0.78682	1.75115	-0.573143	1.76903	-0.378866	-1.92357	1.06534	1.52251	1.13251	2.24441	4.04981	-3.61415	-1.49055	0.762774	0.492274	1.42475	-1.27154	1.21088	-0.28321	0.8833	-0.600261	0.22522	-1.1233
ENSG00000188641	-2.4777	-1.54164	0.148436	-0.540074	-1.67183	-0.599625	1.16683	-0.180742	0.991641	1.53685	0.902786	0.61177	0.263489	-0.227648	1.0542	0.312129	-0.379105	-0.291235	1.86388	1.0186	0.0140117	0.599226	-3.09178	-0.0264616	0.160989	0.195093	0.0753269	0.944963	1.47384	1.3903	-4.31956	-0.751869	0.709709
ENSG00000183760	4.01234	-0.134081	0.672187	0.729967	-1.01404	0.497434	-0.123213	1.6747	0.459323	-0.141614	1.79599	-0.116802	-0.634098	1.44507	-1.44685	0.0680303	0.924418	0.870308	0.624721	-2.09102	-1.3078	5.00957	-1.65887	2.65899	2.65145	0.516573	0.654861	0.226367	1.97962	-0.139147	-2.55709	0.137999	-0.0898627
ENSG00000177511	0.052313	0.704366	1.51019	-2.16398	-0.949627	1.68261	4.16151	4.58008	1.05877	0.237158	0.417335	-4.89257	0.909209	2.21268	0.106463	-3.22672	-0.28156	0.714735	0.650088	-1.92404	0.512717	1.11049	0.0620393	0.314085	0.465903	0.356503	-0.268375	3.1049	1.83883	1.69864	1.05822	-1.59984	3.1457
ENSG00000242173	-2.00186	-1.36612	-0.350537	1.5651	-4.16958	-2.18568	1.09277	1.82715	4.02155	3.08548	2.87533	5.08435	-2.32879	0.266844	-2.70983	-1.21152	-2.27008	0.202657	0.343062	0.931456	-2.31709	0.216947	1.08988	0.291233	-1.06976	-0.692751	1.74773	3.12822	0.362073	1.38829	1.19814	-0.596014	0.722104
ENSG00000135046	0.455598	1.43526	-1.77578	-4.10246	0.87372	-0.6094	-0.678644	-0.636053	0.632065	-1.75208	-0.29416	-1.56642	0.335667	-2.4266	0.375797	-1.03659	-3.64455	0.448458	-0.561181	0.14321	-2.60059	0.165334	-2.40611	0.610144	-1.55751	-1.04495	-0.257504	0.0334732	-0.0467799	0.242686	-0.677568	-1.50622	-0.920104
ENSG00000076344	0.817013	1.7822	-1.65205	-4.17131	-0.50625	-1.01739	0.20934	-4.12559	0.503777	0.689966	3.81882	1.00296	-0.453822	-0.549953	-1.60127	-1.90723	-1.17736	2.20375	-2.6804	-0.372573	2.02048	3.58747	-4.35222	-0.363645	-0.835029	0.0141858	1.40757	-0.713711	-0.104735	1.22647	1.07049	-1.6296	0.659504
ENSG00000171243	1.35198	0.784786	1.32322	0.250431	-1.82924	0.960889	-0.00992704	-0.265537	0.886545	3.51674	1.43912	-0.483407	1.84441	0.444248	-0.377887	-3.7733	1.69228	-4.00931	-2.71747	0.282379	-3.11322	1.87494	0.201778	1.28719	0.196191	1.35943	3.50511	0.0864817	-0.461711	0.853072	1.7733	1.08789	3.73921
ENSG00000157087	0.855076	-0.0020351	-0.818205	0.790917	-2.03617	-1.2503	3.70545	-0.112476	-0.116289	0.748437	0.965162	4.92708	0.0750932	-6.08544	0.733106	2.30916	-0.393739	2.32297	-0.355737	-0.439052	-0.0802996	-1.41146	-0.81978	-0.3692	-0.290321	0.626462	1.62628	4.46208	1.42	3.38171	-0.181649	-2.23671	1.1326
ENSG00000060566	-2.65337	-4.95238	-1.03685	-0.17642	0.907648	2.98299	-1.9476	-0.886287	0.654152	-1.11376	-0.728906	-3.76567	1.91064	-0.716292	-0.272513	0.451103	-1.80062	0.642418	1.34065	-1.39506	0.670122	-1.05851	-0.984759	-6.43931	-1.10699	-0.761532	2.24842	-0.500653	2.30643	-1.60006	-0.428976	-0.845065	-5.45748
ENSG00000146910	2.90966	-4.5413	0.592585	1.29166	-0.0785234	-0.316545	-0.186768	-0.420649	0.498667	0.306771	-0.642194	-2.69343	1.21796	-0.407334	-0.0234636	-0.433576	0.764862	0.099049	1.6959	-0.395753	-1.7424	0.607253	-0.21322	-0.488219	-0.228028	0.196654	1.21609	0.580584	-0.240163	-0.36132	0.0433409	-0.371371	-1.49771
ENSG00000096433	0.0376907	0.206208	-0.00274007	-2.21556	-1.17126	-0.0104425	0.781291	0.380721	-0.342582	-0.0804909	1.22009	0.842326	-0.196584	-1.53439	0.0911178	-0.265363	0.799028	-0.206725	0.0897579	1.56773	-0.0140695	0.754832	-0.0946404	1.31387	-0.354213	5.21219	-1.09553	-0.226617	0.783434	-0.162436	-0.10376	-0.144899	-0.284704
ENSG00000177453	0.504105	-1.48002	-1.88027	-0.775455	-1.64156	-1.55128	-2.82424	-0.338156	-1.54145	-1.62434	1.01772	-0.899925	-0.723283	-0.72263	0.950712	-0.776079	-1.58972	-0.140457	1.32388	1.17499	0.85201	-0.476693	0.685634	-3.16392	-1.64593	-4.64516	-1.24913	-0.96155	-0.527237	-0.315294	1.32864	-0.0977265	-0.777363
ENSG00000163545	0.199063	0.632457	0.919071	-2.30456	0.583871	-0.319983	0.129981	0.715801	0.261385	2.04585	-1.65574	0.0563905	0.958958	0.429283	-1.26081	-0.0681477	0.203414	1.48539	1.40188	-1.10838	6.97995	1.52005	-6.03154	-2.30146	-0.358612	0.477757	-0.29164	-0.112118	0.413215	-0.332152	-0.439752	-0.759363	0.668274
ENSG00000074935	0.964566	1.07839	-1.22741	-0.178232	-0.142603	-0.00360622	-3.77126	2.2809	2.4128	-1.43668	4.07972	2.10024	4.09137	-1.17754	1.69002	-0.548772	-2.906	1.8802	-0.517646	0.0173388	1.02911	-2.0626	0.173421	-1.41453	-1.79886	-4.58294	1.09256	2.83165	-4.4453	2.40309	1.84818	-1.9987	-0.195374
ENSG00000157927	2.36796	-1.90554	0.0532322	-0.0623066	0.250144	-0.436412	-0.507289	0.529742	0.736721	-0.0770356	3.41245	0.124804	-0.245393	0.16401	0.526322	-0.231813	0.126077	0.708926	2.24029	-0.361044	1.19837	0.907609	-0.7814	0.0747219	-0.249871	1.79275	0.516961	0.925478	0.512105	0.465169	0.29378	0.580516	3.48627
ENSG00000178965	-0.261627	0.205172	0.209877	-0.137631	-0.754749	0.657855	-0.282238	1.20461	0.325025	0.238743	-0.302039	-0.617244	-0.333713	0.575576	-0.401742	0.918524	-0.393747	-0.573909	0.0067578	-1.09072	-0.162291	0.0897203	-0.491183	-0.546914	-0.340248	-0.4159	-1.64282	1.25956	-0.612139	0.502664	3.30417	1.17299	1.63435
ENSG00000138642	-0.650911	-2.78134	-1.21915	-1.03346	0.390668	-1.84371	-2.83996	0.0163751	-0.705913	-1.00571	-2.20782	1.33735	0.995255	-0.352957	-0.704302	-2.04126	0.732343	1.82626	0.729948	-2.07602	-2.03359	1.37315	-1.32326	-3.41812	1.90588	-0.45911	-0.312498	-0.581695	2.81978	1.64832	-0.551881	-0.0637317	-0.675737
ENSG00000136250	4.35158	0.003436	1.21916	2.08478	0.830349	2.17497	0.243328	-1.5789	1.75567	-2.11093	-1.7919	2.33778	0.434978	0.0998874	-1.77718	0.487887	3.54729	-0.0728143	0.420128	3.65714	-0.791692	2.5054	0.199347	0.115537	1.618	0.0514794	0.203423	1.87564	0.514441	2.21236	3.59115	1.58935	2.57527
ENSG00000197557	1.45831	0.560501	-0.225967	0.718235	-0.163737	3.05482	0.27021	-0.13037	1.16528	-0.527473	1.11804	0.559116	0.910742	5.30341	-3.44838	-0.401577	0.21893	0.559905	0.462242	-0.298434	-1.05034	-1.04784	-0.497809	0.36606	0.656574	1.71604	-1.20976	0.161701	-0.395559	1.35475	0.428093	3.66647	1.66181
ENSG00000140538	-2.25142	-2.16407	1.55629	-0.20373	-2.92585	-0.0188251	-2.84394	-1.40541	-3.31554	-1.52131	1.80343	0.164379	-1.11049	-1.90742	-0.316829	0.231005	0.938457	-4.49398	0.4345	1.38077	1.19911	-0.0529693	0.206208	-2.06205	-1.13871	1.07103	-0.0107911	4.7049	0.893569	0.943678	-0.969696	-0.148292	-1.53553
ENSG00000154655	0.637544	-0.383774	-4.44401	-0.621022	-0.550994	1.01842	0.0617935	-1.18899	-4.33584	0.370936	0.767254	0.555873	-0.593897	-0.803289	1.48082	-0.00476787	0.501821	2.71215	-0.497936	1.04839	-0.0236384	2.0744	1.1822	-0.479013	-0.39216	0.150233	-0.28183	3.42552	-0.197692	-1.50512	-1.12663	-0.532324	-3.45855
ENSG00000112972	-1.17955	1.79486	4.08971	0.193302	-0.159098	0.210688	-3.15916	1.00784	-0.875201	0.0284803	1.91712	-1.51867	1.16646	-0.201223	0.0384525	0.0780736	1.80816	-0.138685	2.02947	-0.0647032	-1.18018	-1.37423	0.171027	-0.234159	2.02247	-0.587952	-0.284717	6.27355	-2.51135	0.796554	0.20061	0.446741	3.57844
ENSG00000144369	2.10324	2.51867	2.63876	0.631482	2.03475	1.56529	-1.22869	1.86546	1.04159	1.62799	0.875343	0.263869	3.77891	1.33372	1.62733	0.0524218	5.13731	1.41392	2.07837	0.86263	0.117089	1.34499	1.15006	7.00513	3.02032	2.89489	2.97858	1.25872	4.4629	0.021034	-0.920034	1.8293	0.0160904
ENSG00000105672	-2.98607	-4.29836	-0.190537	-0.33375	2.0592	5.29694	1.89889	-0.400366	0.253406	-0.490414	-0.641046	-3.3286	-0.891692	-0.102056	-0.920559	2.45936	0.917391	0.370988	-2.04053	1.08282	-0.655349	-5.56002	-0.364821	-0.935643	0.847503	-0.270482	0.891486	-0.244932	-0.893437	0.441128	1.60388	0.0390651	-2.24156
ENSG00000100714	2.10007	-0.938751	3.90068	-1.37	1.37091	3.54064	0.353808	0.531537	4.04501	-0.517892	0.491382	1.93342	-0.290796	-1.37445	1.66651	0.816189	2.87039	2.16185	-0.216609	-2.64758	0.177364	0.0546882	-0.436926	-0.111114	0.137079	-0.112101	2.02631	2.65462	3.49602	2.29629	0.487177	1.24639	0.674162
ENSG00000101203	0.143723	4.39696	1.02513	0.875265	0.592055	-1.13708	0.9341	-1.7545	-3.79807	2.44841	-0.536218	1.07171	0.607208	-1.50972	0.980542	0.315441	-2.69572	3.50046	2.27952	-0.27511	-1.25763	4.93677	0.192814	0.359282	0.597943	0.625429	-0.724848	0.591298	-2.57666	3.57555	0.32384	0.853292	0.970169
ENSG00000196562	-0.865049	-3.24377	2.71081	2.42816	-0.539663	-3.85994	-1.94431	-1.19419	1.13345	-0.128589	-1.51534	-0.121769	-3.33925	1.26191	-1.03906	0.0912085	-1.02316	1.20675	2.1474	-0.658295	-2.03935	0.579398	4.21736	1.553	-2.92269	-0.962446	2.61242	0.773188	2.09499	0.403636	-1.86617	1.47618	2.82058
ENSG00000053372	-2.28177	0.215994	-0.145392	-3.06133	-0.33187	-1.47211	-0.504756	2.61078	-0.674024	-0.272146	2.13933	0.489917	-2.429	-0.329602	-1.13907	0.565262	2.32703	1.24941	-1.14912	1.94108	-0.15515	0.455544	2.54255	-1.05794	-1.48395	-0.74418	-1.60234	-0.3434	-1.06232	1.42638	0.70849	-0.0517592	0.0964817
ENSG00000134905	-0.697216	-0.168639	-0.39801	0.681701	2.8829	0.899129	2.27666	-1.09346	-0.927794	0.349338	-1.7395	-2.28497	-1.79887	-1.46815	2.36323	0.0274742	-0.37792	1.13682	-0.633467	-0.220187	-1.7504	0.364088	-1.09685	0.0129343	0.187692	-0.147737	-0.541157	-1.04407	0.219338	-1.55488	-0.293832	-1.59439	-0.485762
ENSG00000105409	0.697371	0.0597926	-0.752683	1.14246	1.18105	1.01069	-0.525493	3.87226	-3.87461	-3.36051	1.26341	1.07199	0.523008	0.919297	1.89579	0.192897	0.501709	0.726248	6.04829	0.587102	-0.816428	-1.98292	-1.12242	0.000480992	-0.841291	0.104791	1.54028	3.85256	-1.71873	3.86161	1.1302	4.29625	-0.0703103
ENSG00000112697	-0.231255	-0.731071	0.290181	-0.0351281	2.49469	-0.219191	0.996161	-1.56807	1.79473	1.29058	-1.41763	-0.531171	0.0954036	0.160541	-0.195704	-0.482717	-3.92214	2.1642	-0.831272	-3.03956	-1.79701	-1.02121	-3.44651	-0.311512	-0.0926471	-0.214024	0.0611797	0.59914	-0.566343	-1.92059	0.73314	-0.171475	4.20569
ENSG00000162873	-2.31918	-1.15083	-1.15705	-0.774121	-1.90012	2.07585	0.842566	-0.0940757	-1.01149	0.343832	-4.11454	-1.90764	-1.39391	-0.081309	-1.10609	-0.594897	-1.62687	-1.93612	-1.12598	-1.05617	-0.759559	-2.1068	1.43944	-1.93931	-4.39167	-1.49456	1.44054	1.58283	-0.415447	-1.06465	0.6331	2.05045	0.97567
ENSG00000155760	3.87528	-1.45054	2.47136	-0.602777	-2.16609	0.673653	5.40975	0.188533	0.839605	-3.57223	0.322625	2.0143	-0.281978	3.31634	-0.286928	0.685708	-0.47856	1.28425	1.31717	-3.23008	-0.585445	0.582108	2.36458	-0.70545	-0.0427131	2.53552	0.650198	1.39487	0.436906	-0.166664	-2.02948	-2.03193	0.0927878
ENSG00000124160	-0.58547	-0.170214	1.25353	0.446564	-1.20015	0.42548	-1.08818	1.52969	-0.482954	-0.502681	0.0292711	0.126619	-0.363025	-0.57379	-0.172515	0.111594	1.97458	0.886195	-0.48446	1.1375	-2.77165	0.468617	-0.640324	-0.0738548	-0.00917858	-0.536618	1.48924	-2.29294	-0.0786837	0.214638	-1.92466	-0.508646	0.438118
ENSG00000145284	-3.49634	-1.7754	-1.95004	-0.79996	-0.743971	1.04339	0.248038	1.17348	-1.90349	2.84761	5.45389	-1.59469	0.14216	1.56896	-3.15881	-3.2776	3.42978	-0.765724	4.45585	0.900769	-2.49204	-6.22396	0.707799	-1.73773	-1.24372	-1.9755	-3.20348	-2.56739	3.32657	1.14073	0.533955	4.47599	-0.68032
ENSG00000095932	1.37242	1.03143	3.80337	0.669171	1.61902	0.452216	2.43024	0.789272	3.09273	2.41504	0.788743	2.27131	2.74452	0.724834	1.61274	2.68265	1.52821	2.24499	-0.707341	-1.24836	2.82658	2.09779	2.53615	1.0153	-0.735502	-0.175385	5.8432	-2.17884	2.16685	1.27757	1.90934	-0.720391	1.39342
ENSG00000122417	-1.10152	2.99742	1.69795	-1.6158	-0.816088	2.12072	0.575115	-3.59317	6.46865	0.595531	0.935723	-0.133035	-0.273723	-0.296929	-1.52097	1.3147	4.42943	3.44878	-3.51211	-1.08674	-0.598617	3.08797	0.970656	5.21547	1.82862	0.768634	0.71459	1.49867	0.840519	-0.147029	0.144283	-0.236084	1.80408
ENSG00000164305	-0.639606	-0.0844331	0.236822	-0.300345	0.514381	0.865687	0.0176541	-4.76424	-0.910835	-0.108965	-0.286581	-0.945938	0.286757	-1.33416	0.587437	-0.713975	-0.0652077	0.61858	0.130198	-5.25829	1.78587	2.00461	0.36178	-2.1474	-0.545202	1.12266	-1.82889	-0.459628	-2.28044	0.44245	-0.185173	-0.210044	-0.226531
ENSG00000163938	-1.28478	-1.06673	-0.013514	-0.416818	-4.20344	-0.00881019	2.10691	-0.738813	4.20567	0.113242	-1.70338	-2.83237	-1.04607	-2.65312	-0.980926	-1.40974	-0.777677	0.454661	-0.289076	-0.381798	-0.263511	-0.408354	0.320019	-1.20303	0.000841873	-0.469413	-1.50004	-0.684172	-0.601986	-1.27343	0.530697	-0.142714	-0.634998
ENSG00000169224	0.526379	0.805099	-1.29356	-1.51694	4.01747	0.262443	3.79732	-1.25174	2.31606	1.66946	-0.371246	-0.103016	-2.17565	2.1279	0.143793	-0.0243888	0.452665	-0.08735	1.54028	1.672	3.99331	0.544861	-0.551619	0.172017	-1.74816	0.134852	-0.0482169	1.25372	0.324574	2.54267	-0.679889	0.831118	-0.740742
ENSG00000197977	3.44477	2.11409	3.67985	-1.67369	0.716901	2.2268	0.200122	0.397173	0.733386	0.552696	2.47876	2.55648	7.21948	1.54025	3.64737	1.74487	2.01508	0.931938	2.3977	1.8883	-0.516245	3.34026	0.747239	3.07405	3.50307	3.26025	2.09799	5.24275	1.53932	3.95067	0.579253	1.18035	0.693963
ENSG00000204536	-1.73733	0.108709	-0.181374	-0.0553089	0.0358539	-4.1991	-3.79337	0.465434	-0.416298	0.200041	0.390879	-0.796716	0.323066	-0.937862	1.18442	-0.681815	1.93124	1.76419	0.972053	-0.584329	1.13852	-0.0485581	-1.47674	6.32231	-1.05639	-0.471685	-0.973754	0.0362483	-0.737276	0.270135	-1.22245	0.316259	-0.178435
ENSG00000136261	0.168507	-0.425418	0.155575	0.430621	0.172948	-0.671911	-0.214696	1.19361	-4.21134	-2.41055	0.800944	1.93269	0.0441019	0.145162	-1.16616	2.65684	0.120406	0.826391	0.340936	0.867888	0.949689	1.80501	-1.54997	0.983172	-0.314353	0.0768151	1.4509	2.90488	0.355263	0.99834	0.297435	0.0917753	-2.48514
ENSG00000243667	-4.53554	-2.57178	-1.74082	-1.62134	-0.188608	-5.48866	-1.85379	-2.67057	-3.44757	-2.5428	-5.77644	-4.15478	0.216721	-5.34733	-1.72443	-4.76798	-1.0276	-4.44354	-3.29416	-2.72602	-0.905951	-1.93523	0.0384949	-3.6566	-2.20252	-1.62375	-6.71097	-3.09893	-3.06098	-0.269761	0.699745	-0.848173	-4.30134
ENSG00000132932	-1.90547	1.39431	0.082791	-0.875389	1.48301	-0.85179	2.83506	1.11843	2.09327	0.130878	2.26296	0.012595	-0.0969838	-1.47881	0.0350077	-0.760791	4.07505	0.828574	2.88721	-0.524154	-1.57153	-0.194835	-3.01567	8.04092	2.60686	-2.9625	-0.203528	2.10803	-1.35476	4.79488	2.32194	-5.25475	-0.648679
ENSG00000050393	-4.52803	0.0964218	-0.255772	-1.81041	-3.4648	-1.12436	-0.0982276	-0.236387	-1.18502	1.23193	-2.79677	2.03811	0.944058	3.89098	-0.25377	-2.69718	-1.62775	-5.20804	-2.0082	0.985212	3.03682	-0.27544	-1.42793	-4.24369	1.09442	-5.96006	2.97778	-0.57701	4.14077	0.586123	-0.973784	0.141108	-3.03931
ENSG00000152583	0.0568712	3.90973	2.78915	-0.900561	-1.27867	1.5114	0.99044	2.40577	-0.116412	0.630531	1.92602	2.1482	0.124404	-0.133396	2.66791	-3.36259	0.0633148	3.13976	0.73552	-1.99643	0.913709	6.77259	1.67989	0.300838	0.520576	0.0270504	-2.24032	1.15001	0.996535	2.97322	1.5073	0.412889	2.25792
ENSG00000171509	-7.70424	0.278554	-3.64919	-1.54601	0.292148	-1.96342	-1.14816	-0.126284	-0.00150403	2.80998	1.10097	-1.27834	1.17312	0.761344	-0.331847	-1.55086	0.463282	1.77132	-0.82155	2.22551	-0.119276	-0.566612	-0.0293363	0.908061	-1.19116	-1.00649	-0.128417	-0.439846	0.36037	0.138892	1.75444	7.25553	2.04186
ENSG00000169288	-4.40623	-0.666401	2.68626	-1.33773	-2.9226	-1.93506	-1.76164	-1.46002	1.95753	1.25518	1.83864	-0.306099	0.259369	-2.18786	-1.25287	-4.01548	-3.83005	0.58297	-4.88416	-2.80533	-1.57355	0.43212	-0.486729	-0.446306	-1.67545	-1.59845	-3.27031	-0.489522	1.13654	0.987038	-4.48658	-4.01099	-2.47004
ENSG00000162576	-1.48794	-0.271825	0.0623615	-2.71249	-1.30084	0.0431262	4.0088	1.09019	0.0102307	0.41231	-0.298753	-0.157674	1.13407	-0.259649	0.548834	-3.02509	-3.60061	2.96381	-0.737565	-2.61293	1.9912	-0.907331	3.956	1.55965	1.44271	-2.89252	0.42855	1.49052	0.868157	-0.208747	1.07701	-0.267507	0.00108512
ENSG00000132676	0.782181	1.17549	-0.0732574	-1.66607	0.892061	0.299247	-4.79679	-2.36953	-0.189676	0.381759	1.87182	-0.899627	-0.307278	-3.07343	-2.58961	0.655814	-0.215655	0.694138	-0.521029	0.970097	1.29546	1.21209	-1.27047	0.450516	0.689481	1.33323	-0.818273	3.58881	0.0378266	-1.01324	0.189942	0.594245	-0.104493
ENSG00000126391	-0.150676	3.25348	0.190136	0.657201	2.12315	5.17701	3.14592	1.77396	1.64841	-1.38864	-6.15975	0.522297	-0.404266	-2.84087	-0.915458	-0.575959	0.881915	1.27817	1.25557	-4.28391	-1.14019	-1.68507	0.252266	-4.45836	-1.39367	2.92497	-0.874871	-1.41003	-1.20583	3.56078	0.180309	0.388489	-0.382458
ENSG00000185043	-0.473597	-2.54883	-0.0103301	2.3931	0.350768	-0.706026	0.55449	-0.290804	-0.132599	-0.326014	1.76326	1.25483	-0.799869	-1.50325	2.57696	3.25822	-0.399338	1.20562	-1.42859	1.09019	-0.634678	-0.585349	-0.954681	-1.58463	-1.46736	-3.70834	-1.38515	1.71572	-0.313833	0.340956	0.321639	1.47786	0.646382
ENSG00000114904	-0.728519	0.87333	1.39337	-0.176709	6.31297	-0.10802	-0.21716	0.482008	-3.00745	-1.45636	-0.701615	-0.575936	-1.1373	-1.4984	-0.85585	0.348538	0.092157	3.51166	-2.21033	3.4305	1.25933	-1.33053	-0.0171439	-0.557687	-0.610055	0.488082	-0.319822	1.13558	-0.215484	0.582549	2.32814	-0.346654	-1.06924
ENSG00000182768	1.1325	0.68209	0.742334	2.44465	-0.0700094	-1.51657	0.0809925	0.528045	-0.510718	-0.258693	2.27281	1.39808	0.711242	0.096327	1.60531	2.46997	1.23448	2.37022	-0.0889302	-2.21874	1.23571	0.756821	1.55872	0.87817	1.57811	1.65876	1.15635	1.41685	0.494736	0.822955	-0.0531569	-1.69144	0.0232651
ENSG00000121297	-2.50711	-2.5069	-2.46084	0.56028	0.647581	1.00912	1.19309	0.868169	5.30947	0.285343	0.655319	3.08103	0.910588	0.218872	-0.550712	-3.98237	-1.95724	1.63745	1.13592	0.846183	-2.376	0.56119	-0.161424	0.383791	0.486582	-0.39797	-2.8743	-3.45145	1.7095	0.726697	0.221756	0.799871	1.44325
ENSG00000119203	-1.50359	0.58785	-2.12366	0.0696575	-1.87164	-2.79552	-0.00245033	-2.16028	0.994523	2.26878	-0.768658	0.844504	3.07465	-3.23567	0.222598	-0.0638445	-2.69498	3.34207	-0.415945	3.71307	-4.10593	1.21583	0.548441	1.88876	1.11666	0.498027	-1.59073	1.71605	-0.127365	1.66694	0.125196	-0.445301	0.950482
ENSG00000071082	-4.57418	2.9218	0.730534	-2.68799	-0.807454	-3.11708	-2.54706	-1.06109	-2.27817	4.65265	-0.916843	-0.30703	-1.07251	-1.72525	-3.63588	-1.80877	-0.657952	-2.02625	0.148933	3.50059	-0.328792	-1.53296	-0.866886	-0.907263	-0.0796862	-0.247762	-1.66731	1.49378	-0.458987	1.81451	5.90121	0.865087	-0.0207386
ENSG00000162623	2.65407	0.684103	-0.0126455	-0.578774	-1.79118	-0.702597	-0.74928	-1.28996	2.33498	2.12073	0.666344	0.119029	-1.64401	-6.2455	-4.53133	0.0352791	3.58406	-2.06158	2.45847	0.608249	-4.51036	-0.838152	-1.28507	-0.481497	-5.55887	2.98106	0.314989	-4.44186	-1.22906	2.15466	1.42071	-0.593733	1.32656
ENSG00000071242	-1.4202	-0.915984	-0.961295	1.07111	-1.84343	0.887704	-1.78231	0.482691	4.61715	0.68319	0.680631	-0.789674	-3.35653	-0.11052	1.65879	1.8236	0.68844	-0.0935314	-0.598404	-0.800437	1.56226	-0.645428	0.805294	-1.3281	-1.55141	-0.177397	-1.38588	2.88672	-0.213462	2.4029	-0.283572	-0.34347	-0.0779692
ENSG00000090487	1.79972	-0.244248	1.36238	-0.172536	0.844254	2.83788	0.818355	0.673612	-1.93994	-0.116647	-0.308925	0.773176	4.86555	-0.18052	2.16577	-0.927385	2.13995	1.52529	1.00866	0.556385	0.40802	0.403316	0.427495	0.648376	0.458	0.523332	0.336023	1.82482	-0.377456	-5.21293	0.394038	0.038795	0.0679524
ENSG00000151577	1.03949	0.443877	0.826464	2.92126	-0.0651864	1.37951	0.0773588	0.210539	1.02595	0.404428	0.0487687	-1.30794	-0.638993	-0.66885	-0.420624	0.0366347	-0.189732	-0.0516551	0.0957295	0.474799	1.74871	-0.824057	-1.01141	0.211152	-0.33797	0.406952	0.0300711	0.516636	0.895595	-0.548871	0.492513	1.19259	0.600805
ENSG00000104723	-0.62174	0.505577	-0.950592	1.8038	-0.451519	-0.38008	-0.53587	0.7581	-0.888308	0.26999	0.422991	0.336863	0.0691299	0.450369	0.640371	-0.873632	1.21766	0.499669	0.376617	0.121567	1.12551	-5.12217	-1.81467	-1.31512	-0.53788	0.430975	1.93697	2.95196	-0.559525	0.338248	0.75789	0.299914	-0.745243
ENSG00000163382	0.932814	-1.72255	-3.67159	0.57173	-1.18762	-0.866732	-0.00526263	-2.63684	-1.33132	-1.19215	0.202253	1.32618	0.202268	-1.70798	0.0190866	2.21613	-1.67991	-4.35974	0.66156	-1.22765	3.11339	-1.26221	-2.41318	0.946022	0.560309	-4.41085	-0.75766	2.69219	-0.766133	2.58736	-1.024	2.02576	0.615754
ENSG00000125388	1.65579	1.18468	0.919385	2.93846	-0.810835	0.427436	0.122858	-0.24854	0.0515567	0.374928	1.10122	-0.147064	1.79776	-0.0782572	-2.05187	4.54193	1.48783	0.997552	1.30011	-1.43245	0.746065	-2.19444	0.113864	1.48212	0.801273	0.150396	-0.0887127	0.623806	1.0413	1.38063	0.0036937	1.74067	5.60891
ENSG00000092529	-1.0423	1.54966	-0.353038	0.803729	1.14794	-0.6116	-1.33389	-3.16219	1.55827	2.24076	1.19198	0.00433135	0.103017	-0.198777	-1.10015	2.41468	0.397577	-1.08398	0.546585	4.17036	-0.799593	1.22464	-0.425871	-0.0894321	-0.669261	0.587288	0.879704	1.94858	-0.805129	1.48146	-0.54169	-0.699315	-0.266337
ENSG00000144290	-0.062515	1.5413	0.660346	0.600003	1.87194	0.342083	0.096818	0.590159	-0.00580986	1.95695	1.8392	0.277733	0.538637	0.878325	-0.178	2.76162	2.76467	0.663342	1.56162	0.292735	0.477537	0.333159	4.97271	-0.254148	-0.628743	0.0051943	-3.93235	2.81943	-0.492689	-2.40105	0.806347	-0.329249	1.1381
ENSG00000204103	1.46495	0.581893	1.35833	1.02354	0.899024	-0.0135743	-0.946339	-0.354546	0.0373193	0.376207	-0.0148432	-0.405236	5.2121	-0.0186379	0.386188	0.686383	-0.147581	0.72152	1.09534	-0.646306	1.9148	0.430554	1.30533	-0.990479	-0.365982	0.123345	0.29259	1.01136	-0.202203	0.403101	2.17753	-0.555114	-1.33862
ENSG00000170485	-1.76744	-3.97616	0.507808	-2.1851	-4.69701	-0.309698	1.47405	1.79266	-2.78012	0.187022	0.550257	1.54948	-0.987649	0.204339	-2.27535	-0.948324	0.982033	-0.948751	-0.0988383	-0.0942296	0.302073	-1.53792	-2.07117	-1.6302	-0.610164	0.670865	1.00658	0.613484	1.6638	4.97757	1.11323	2.32719	-1.77249
ENSG00000074527	2.1318	3.27674	1.84808	0.532245	2.62811	0.753269	5.31107	1.39788	-3.0663	1.76084	0.207767	0.952429	0.218429	0.334433	2.38968	4.83876	1.19537	1.64629	3.09738	-2.4563	1.35728	0.488674	0.0483258	0.252318	-0.0981578	1.59592	2.01161	-0.871817	3.17705	-1.33448	1.17217	0.493901	1.11549
ENSG00000026297	4.22825	-0.596124	-0.903913	0.344158	-2.28976	-0.94806	0.65004	-1.19991	2.50834	-0.487782	1.38241	0.903507	0.0858357	-0.0513031	0.877495	-0.00721503	-1.92608	-1.06996	-0.129863	-3.61157	2.25966	-2.46416	-1.68442	-1.00609	-2.93947	-0.579056	3.39182	1.09616	4.33569	-1.01241	2.62244	-0.825114	0.267698
ENSG00000151882	-2.6487	0.768731	1.17419	2.07661	-3.09238	-1.16419	0.209109	0.929639	0.136551	3.44058	-2.64923	-3.01039	-0.143965	-1.02846	0.0876331	1.66585	0.596545	1.06771	0.257737	-0.244785	-0.320039	1.82704	0.812791	-0.917772	-2.71226	-0.486445	0.0846543	3.11082	-0.462699	0.792458	0.385768	0.906334	0.221061
ENSG00000180537	2.63328	1.16149	-0.98506	0.695939	3.98774	-1.77833	7.09866	2.7927	0.00288165	1.1941	1.99603	1.63979	1.42624	2.38929	3.69699	0.134385	2.2117	5.43622	-3.36716	2.7006	-4.1904	-0.333816	-1.25224	0.839347	0.967077	1.43673	0.13657	1.44983	-3.99792	-0.147672	-2.94681	0.697427	0.799782
ENSG00000170893	0.996169	0.2951	2.7032	0.70467	1.32445	0.486107	0.183263	1.35169	0.31691	0.991463	-0.384198	-1.44858	-2.06156	-0.700327	-0.500081	1.32869	0.852098	-0.0904669	-1.5755	0.427602	1.42524	3.86235	0.260797	1.72378	0.450009	-0.286127	0.175311	0.205293	1.47876	1.14151	-0.260394	-0.305597	1.31046
ENSG00000144228	-4.72887	-1.79373	4.46965	6.34952	-3.76451	0.206952	-6.97715	-1.27443	3.00194	-1.85376	-3.23097	-2.4158	1.45858	-3.36031	-3.4866	0.690834	3.13184	-4.63554	-1.83999	-2.42146	-2.99427	-1.33955	-3.28418	-0.592963	0.0213533	-1.44101	-0.966175	0.416871	-2.57732	-2.62578	-1.5403	-2.81092	-1.31133
ENSG00000108231	-0.184728	1.6114	1.20211	-3.32768	-0.84698	-0.352399	-4.9319	-3.836	-1.88374	-1.49398	0.179864	-0.922936	-0.435704	-1.00886	1.55061	-1.31249	0.0477792	2.08233	-1.90343	1.02616	-1.43526	-4.32382	0.316395	-2.90401	-0.324807	-2.51348	1.07801	0.699754	-1.30594	-1.80981	1.42405	1.34251	-0.968906
ENSG00000214063	-1.6939	0.268949	-0.609545	0.0981706	0.460409	1.91019	2.70946	0.00694177	1.80187	0.776865	0.585832	-0.0774656	3.31294	-2.72602	0.516319	-1.07756	-1.24339	-1.02102	-0.76257	-4.58958	-0.400995	-3.26625	0.265095	-0.666377	-0.681498	0.154639	-0.947395	5.05373	-1.33543	1.60197	-2.40417	-3.85407	4.35292
ENSG00000118407	-1.36712	-2.57116	0.56165	-0.12377	-0.684601	-1.61926	0.43555	-0.832187	-2.1348	-4.13751	2.57555	1.9609	-1.40724	1.62544	-1.19958	-3.01956	1.74914	-1.31142	0.806883	-1.41281	-0.342435	2.61482	0.141518	1.14744	2.79786	1.05176	-0.666594	-1.25631	0.954783	1.5362	1.46561	-0.578454	0.806173
ENSG00000087008	3.67308	2.68458	2.00818	-1.79559	2.69765	-4.6653	-0.254993	-3.09211	-2.50216	-0.0879139	-0.0309148	-0.84475	-0.998257	-0.557664	-3.05786	2.69824	1.31986	0.281483	-2.29291	-0.185833	2.20533	0.186592	0.755562	0.875523	1.79103	-0.439861	1.8388	1.88283	2.77513	0.49973	-0.427308	-1.34071	2.0785
ENSG00000184384	0.15026	0.905568	3.00473	-2.58382	-0.00983185	0.534086	-0.11756	-3.31016	0.323175	0.648934	1.13551	0.150704	1.11107	0.274405	2.37044	-0.962396	0.834105	-0.57718	-0.941177	0.672407	-0.0547174	-1.12213	-0.11338	1.27855	1.00358	0.859813	2.39973	-0.0638836	0.167253	-1.26948	4.66628	-0.270673	-0.137454
ENSG00000162722	0.543848	-0.188412	0.300071	1.03871	0.875674	-2.6895	0.445944	0.121909	0.702015	0.331717	-0.472779	-0.564928	-2.84104	-2.37446	0.985577	1.44101	1.60401	-0.239763	0.522311	0.933451	5.10266	-4.66662	-3.91376	-1.22382	-1.6592	-0.580885	-0.246051	0.220194	-2.02247	0.61443	-4.84003	-0.877764	-2.84257
ENSG00000137474	0.506504	-1.14553	-4.02795	-0.970505	-2.74995	1.89053	1.15232	-0.122325	2.91109	-0.634137	-0.0435452	0.565874	0.119461	-0.512552	0.570629	-0.244556	-2.16829	0.0566398	4.6601	-2.54894	-0.204107	0.385353	-1.45437	-0.457141	0.206732	-0.0754005	-0.822058	-2.01203	0.291679	3.01345	-0.817686	-1.59917	0.298396
ENSG00000149231	-3.7267	1.81962	-3.50911	-0.945559	-1.09129	1.77942	-1.10028	-1.76971	0.0511985	1.91061	-4.29066	-0.371118	0.295017	1.89897	-0.812128	-0.593638	1.87662	4.27716	1.07239	2.23138	2.85349	-0.099882	1.0988	-1.66712	-1.73252	-1.22204	-1.02135	-0.62806	0.0229252	1.18639	0.438365	-0.251067	-0.408558
ENSG00000155011	-1.69897	-1.29981	-0.732983	-2.50047	-2.88078	-1.30424	-1.04364	-1.79301	-0.606075	-1.42405	-1.00324	0.824605	1.08604	0.145198	-2.59934	-0.5467	-2.1578	0.112447	-1.48107	-1.35684	-0.388778	1.65733	-2.41831	0.701567	-0.176441	6.13748	2.2314	-1.08318	-1.40896	-1.93957	-0.515717	-0.193716	1.02656
ENSG00000145247	-4.56571	-0.80112	0.16722	-1.2382	-2.05604	1.71043	0.0308425	2.50974	-1.88743	3.88802	-6.62327	-3.17762	-5.39714	1.23221	-3.34055	-2.62036	-2.59872	-2.79508	-1.33312	2.08906	0.236764	1.36114	0.281246	-1.87245	-0.403791	-0.638874	-0.743715	1.84128	1.06686	0.813278	-0.330288	-0.199932	0.368956
ENSG00000141837	-1.88011	-5.4588	-0.547227	-0.819088	-1.60592	1.19865	1.54452	1.04204	2.29041	0.86344	-0.481895	2.91257	3.3968	-0.24924	-0.642002	2.07145	0.258684	-1.51249	-1.29692	1.39861	-0.426494	0.281714	-0.556341	-4.3467	0.714953	1.81078	-1.25821	3.29734	0.79922	2.05365	2.53834	0.856332	1.0083
ENSG00000112033	1.9693	1.62077	-1.55244	0.244476	-3.24484	0.102296	-0.775658	-0.0217863	1.12757	0.0357724	2.24498	-0.675491	2.39121	0.0459953	-1.56549	-0.539095	-0.768805	-3.0849	-2.0642	0.630273	-0.223363	-0.058198	0.422191	-0.633806	-0.750417	-0.573758	-0.975544	0.114249	0.5619	-3.11936	-0.324289	2.57449	-1.50867
ENSG00000073849	-4.06976	-0.208551	-0.877171	1.50717	-1.18046	-1.18158	-0.718855	2.29204	0.00343704	-0.3654	2.2214	-0.23614	-0.169451	-0.253809	0.212317	-1.71856	-4.18412	-0.0895528	-0.891189	-5.5982	0.693235	-0.78632	0.961636	-0.677386	-1.16709	-0.393482	-0.870531	1.38064	-0.801254	0.102455	2.39845	1.03236	-1.43842
ENSG00000124181	-0.85179	-1.68976	-2.2486	0.119899	-3.11185	-0.73558	1.91476	2.99169	0.279259	-0.663633	0.122941	-0.858206	-0.513034	-1.60767	1.43034	-0.700143	0.72837	0.299039	1.43421	0.292113	2.76042	1.34546	0.427374	0.0494294	0.0572876	0.234112	-1.02509	-0.591906	-0.942302	-0.0529157	-2.12555	2.09654	2.05745
ENSG00000077943	-0.893559	-0.666255	0.275311	1.67869	-3.05068	-4.25287	-1.78169	-2.42562	1.6353	-0.325801	-1.37778	-3.65798	0.984039	-1.20591	1.71458	-1.80824	-2.38246	-1.65721	-4.41341	-2.12097	-0.961691	-0.209636	0.203854	0.524354	-0.86748	-0.26545	-1.24751	-3.96501	-4.50674	-5.80258	-2.31678	-2.05233	-1.10632
ENSG00000109832	-1.43835	0.492221	0.173583	0.238238	1.02022	0.514307	-2.54983	-2.22362	0.616191	-0.581872	0.972497	-1.27361	0.952154	-0.0704572	1.30352	1.27408	-3.72018	0.491457	-1.86148	1.40704	0.522758	3.84985	0.21129	-0.960506	0.467135	0.312846	-0.161912	0.975989	1.0377	-0.429332	0.247376	0.770481	0.0540627
ENSG00000180953	-1.42173	-0.701125	2.64914	0.723026	4.23463	-2.35302	-0.808342	0.445016	0.532625	3.77612	0.581732	-0.824843	-3.86251	-2.41102	-0.629211	-2.09019	-0.131734	-0.425562	-0.214137	-0.508012	1.26044	1.68596	2.3593	-0.0348637	-1.26972	-1.1688	-1.60333	0.108965	-0.227691	0.0496726	-4.21258	1.30136	-3.57785
ENSG00000178814	2.27575	0.514248	-1.25383	-0.9623	-1.54172	2.05623	0.445739	0.95914	-1.14529	-1.07581	4.21351	1.9016	0.824281	1.17765	1.62641	-3.67483	0.270199	1.42189	-0.716549	-2.88822	-1.19015	4.49167	1.1029	0.29048	0.0461092	0.752302	-2.02609	0.628588	1.1717	-1.32186	0.125455	-2.78783	3.04978
ENSG00000006740	4.70785	0.250755	0.227329	1.17526	-0.706017	1.3112	0.190159	-3.36286	-2.75883	3.35281	0.380577	3.27857	-1.02939	-4.69023	5.62134	0.297174	2.18584	-0.978417	-1.37681	-1.64571	5.00804	2.39314	-0.954168	-3.57002	1.77383	-2.01813	-1.07283	0.629157	0.430033	0.606147	0.0318202	-5.37702	-0.913303
ENSG00000188811	-0.876228	0.567371	-3.45216	0.13684	-4.15501	2.17205	-0.341043	-1.28892	-3.23056	0.885359	1.78001	0.544278	2.60737	0.432428	1.50035	-0.59507	-0.951301	-0.519857	2.0194	1.09162	2.92113	-0.258667	0.945449	0.992833	1.149	3.9767	0.505597	2.62101	0.402895	0.984066	3.00693	3.41263	1.90165
ENSG00000006712	0.326293	1.05041	1.61648	-0.656783	2.02401	4.60711	-3.1138	2.57148	1.62842	-0.260281	1.61772	-0.959141	-0.0762845	-0.114372	-1.37669	2.69094	1.43789	-1.41332	-0.351798	-1.57304	-0.251472	1.09168	4.85062	-0.535013	-0.916919	1.38764	0.270624	2.04689	-0.781888	1.40826	1.12007	1.9609	1.30256
ENSG00000140937	-4.22236	2.05076	-1.77874	1.75305	-1.21753	-2.06412	-0.761089	-0.306797	1.06927	0.466731	-0.643954	0.0148727	2.39912	1.15125	-2.41827	0.824289	0.421646	2.61419	0.626393	-1.13819	0.690175	0.984609	3.04383	-5.19298	-1.52418	-0.883861	1.1607	1.79207	-3.69787	-0.523612	0.485127	2.3847	-2.05987
ENSG00000196139	-0.532293	-0.463987	-0.0741194	-0.188679	-0.0717252	0.286829	0.073154	0.904626	0.000221051	0.397495	-1.08546	-0.54687	-0.0607688	2.40049	-0.437136	0.0909896	0.0599897	-0.101805	-0.350376	-3.61643	-0.171657	0.0456091	-0.280006	-0.0132929	0.0650917	-1.03923	-1.49893	0.0771552	0.359953	-0.796587	1.61263	0.465728	-0.678468
ENSG00000157379	-0.877662	2.69128	-1.83855	3.36711	0.815395	-0.276981	2.61615	-1.26046	-0.666904	0.268976	-3.21191	-2.30229	-0.845543	-2.58405	-2.4552	-1.56014	-3.17512	1.14385	-1.64233	0.0281592	-1.36514	3.35612	0.215109	0.465549	0.836092	0.640793	-0.715402	0.159832	0.977642	-1.89571	-1.5192	-0.275468	3.66568
ENSG00000112149	3.14578	1.79111	2.59304	1.62032	-1.47464	0.547206	0.749609	3.85512	0.927791	0.627969	-0.627582	1.63393	1.30828	0.871773	1.17249	-0.286315	1.01479	1.36682	-0.659353	2.09941	-0.813414	1.30877	4.75131	1.06116	0.942561	7.8304	0.496238	3.36345	0.248208	0.558382	2.17132	2.49951	0.701956
ENSG00000069869	1.05092	-0.53963	0.225295	0.0592571	-0.600847	-1.16277	2.49462	2.66759	5.71749	0.681189	0.66911	-0.173577	-0.287715	0.0103497	0.0357664	-0.554179	0.535094	-2.39194	1.13592	0.0143672	-0.124089	0.972508	1.01323	1.63215	1.02144	0.827182	1.24446	-5.83343	0.704728	0.693892	1.08084	3.38379	0.0977925
ENSG00000152214	0.679162	-0.69638	0.717894	7.97057	0.0351506	-0.532062	-0.597714	0.642877	-0.29981	-0.450471	0.288544	0.102573	0.194869	-1.0906	0.437585	1.0663	-0.133324	0.470528	0.0965149	-2.23107	2.82476	0.541275	0.0176654	0.373095	0.635454	0.866328	0.706519	1.96006	0.219476	-0.491892	-1.38148	-3.13742	-0.995463
ENSG00000204248	0.718516	1.07673	2.04804	1.11806	-0.707904	0.176178	-0.210655	-0.821878	0.775902	3.598	1.20304	-2.10726	-4.36443	-1.72372	-2.54632	-0.000635062	-0.170508	-0.651816	-0.891958	-1.66631	-6.66996	-0.224903	1.21776	0.839956	1.97907	3.37211	1.99007	-1.36692	-1.45207	3.05339	-0.137121	1.4672	0.555934
ENSG00000108771	0.854959	-1.04649	-0.295469	0.769711	-0.0472291	0.277029	1.11266	0.346849	0.812141	0.976673	-0.130924	-3.87023	1.29522	0.181851	-1.2853	-0.63937	-0.102914	-0.281351	1.55101	-2.54834	-0.24808	-0.394564	0.072165	0.232092	-0.0830772	0.302146	0.310748	0.672321	-0.720298	-0.0991055	3.4049	0.643627	-0.131432
ENSG00000178104	1.21678	1.31904	2.21325	-1.22976	0.221857	-1.69077	0.207452	0.993086	1.14663	1.25243	-0.0505009	0.886649	0.815105	-1.64285	1.54368	0.208034	0.270771	3.82818	-2.57077	-0.0889165	-1.51377	1.21332	-0.717456	1.87425	0.915696	0.460974	0.323645	-0.777555	-0.378018	2.76538	-1.76126	-5.12753	2.12055
ENSG00000011638	-0.296129	2.05436	-0.971788	2.01937	-2.43789	0.446525	2.72969	3.92098	1.20677	2.08275	1.67715	-1.3548	-4.12713	-0.510984	0.626773	-0.0626451	3.80309	-2.20701	-0.182202	-3.19613	0.185156	3.38773	-3.63759	0.232333	-4.94605	2.78016	2.68041	-1.15814	-1.90952	0.972822	1.45423	-2.74018	0.135744
ENSG00000138801	0.853569	2.14331	0.298226	-1.00979	0.730473	-0.043717	2.08116	0.269518	3.76584	1.89513	0.999301	0.908932	2.1178	0.242969	0.300488	0.456209	2.83722	-0.845543	-2.04272	0.132685	0.787437	-2.05419	-0.443087	-0.185818	-0.270947	-0.496105	1.14518	1.84858	0.496435	1.16686	0.133248	-2.95718	1.80887
ENSG00000135549	1.22358	0.0243641	-0.348415	-1.32362	0.180215	1.84634	-0.317272	-1.47511	-1.84671	1.82019	0.870527	1.59831	-2.15375	2.12324	-1.22928	-5.0129	0.889371	-0.688119	-1.13758	0.417604	-0.966645	0.389803	-0.686864	3.00432	-1.23945	-0.432101	-1.75042	2.68113	-0.574074	-0.0443215	-0.422716	1.1561	0.194406
ENSG00000170577	-0.744701	-0.192468	0.559695	-0.702432	-1.74644	0.381678	0.354092	3.87842	0.845742	0.0513183	-0.226762	1.37872	0.7966	1.49305	-0.0256406	2.20912	0.30753	0.802341	-0.47446	0.205549	1.24357	2.66367	-3.65317	-1.80945	-0.739634	-0.0179591	0.0806813	1.38088	1.30236	0.0416345	0.238867	-0.137408	-0.181582
ENSG00000146469	0.294404	-0.380815	0.443175	0.133682	1.11645	-1.22334	-0.572705	-3.33906	-2.07089	0.225922	-1.1101	-6.16413	-0.839767	0.471408	-2.29442	-1.05115	0.401897	-0.222761	0.136059	-1.89518	-1.16018	1.38971	-0.208162	0.950275	1.72793	-1.00254	-0.949952	-0.635578	-0.736198	-0.65828	-2.3326	-0.726397	-0.226043
ENSG00000136830	-1.04965	-0.139948	-3.19653	-1.98493	-1.30678	0.145144	1.61833	5.54461	0.348152	0.351089	2.972	-0.848929	1.06232	0.626262	-0.568756	-1.16581	0.393501	1.35809	-0.816841	-1.02626	0.104903	1.2104	3.41785	0.540054	2.5946	-2.55427	1.69551	0.970246	1.21462	-0.0726463	1.56608	-0.427052	-0.889648
ENSG00000044524	-1.43381	-0.132122	0.923095	0.0890492	-0.474469	0.824906	1.31399	-1.89129	-0.0983515	-0.0692655	0.161997	1.24789	-0.0667575	-0.266817	0.184126	4.00376	0.581886	0.844311	-0.550462	-0.168457	2.91625	1.09287	-0.660517	0.0826063	-0.0348487	1.10642	0.522067	1.72179	0.219026	0.202093	0.206453	-0.325211	-0.828389
ENSG00000118946	0.084256	1.18376	-0.0873619	1.6812	-0.233694	1.34585	2.47052	-0.0861235	1.7802	1.46558	1.82395	0.358734	-1.50461	0.0229119	3.42717	-0.500511	-0.388357	-0.193205	-1.21827	-1.24097	-1.10946	2.98759	-1.10982	0.975662	-5.11523	1.47095	1.06401	0.674388	2.05359	-3.01331	2.73986	0.382593	0.163032
ENSG00000070182	-1.62793	-0.960133	-2.09782	-0.506287	-4.14844	-0.428583	-0.667607	1.97442	1.04143	3.7773	0.59943	-0.916414	-0.0609534	-2.05946	-1.79495	-0.489917	-1.09044	-0.143057	1.48488	-1.14349	-1.61091	-0.710121	0.690507	0.206841	-1.54014	-1.01972	-0.157779	1.63485	-0.843242	0.762347	-0.634671	-3.32525	2.29134
ENSG00000162551	-0.302889	-1.5663	1.57554	1.36237	0.114968	0.377998	-0.789407	0.328876	-0.802711	0.842055	-0.613833	-1.61451	0.98063	-1.55395	-0.000829829	-0.767605	0.615314	1.32839	-0.813214	-0.320731	1.3906	-0.672937	6.60544	-0.0517329	1.85279	-0.788392	3.48378	0.257678	0.630267	-0.253905	0.787377	-0.252439	2.6593
ENSG00000115350	-4.01854	-4.32995	-1.4168	-0.228762	2.95118	2.32669	1.40084	1.71082	0.535431	1.08033	1.19039	0.940775	0.0590546	-0.765394	2.8283	0.247209	0.64065	-0.317498	0.080299	-0.832946	-0.470693	1.13609	0.736624	-1.36392	-0.97242	-2.02422	0.179783	0.584845	0.413723	0.378944	0.285827	-0.169626	-0.214375
ENSG00000187688	-0.598184	-1.26495	-0.0977198	-0.797023	-1.56766	0.0806849	-0.49407	-5.65626	-1.82309	0.346452	0.137723	-0.655976	-0.565912	-0.200616	-0.478479	-0.98038	-0.285217	-2.73656	-1.11247	1.0285	-3.54003	-1.27413	1.45334	-0.807925	0.197931	-0.181934	-0.834082	0.40776	-4.19551	0.591325	-4.39567	-2.68137	2.97375
ENSG00000111371	-1.05673	0.364849	-4.03142	-0.136157	2.49848	-0.16098	3.18838	0.010673	-1.70604	2.68891	0.844272	-0.332703	-0.72348	-2.47651	-0.991387	1.41425	-0.532743	0.868908	-1.89082	-2.02453	1.30742	2.13852	-0.847015	-3.1877	-0.426456	3.13014	0.149925	1.63486	-4.69915	-0.900888	0.326096	2.13935	0.098283
ENSG00000174332	-0.0669813	1.08952	0.627911	0.00217958	-0.333064	-0.520478	0.759919	0.368669	0.413469	0.079951	2.75715	-0.757624	1.484	-0.790991	-0.951957	1.50248	-0.0426175	-0.0550157	0.254652	-4.81108	-0.716963	0.958678	-0.246305	-0.452248	-0.253045	-2.13466	-0.0808266	-2.65337	-1.18487	-0.331902	-4.07869	-0.467437	0.882703
ENSG00000135697	0.451996	0.170589	2.40779	-4.01145	-2.7841	-0.612658	1.80047	1.60184	-1.19893	0.552771	-2.31331	-1.07904	0.969231	1.12151	-0.0864949	0.804427	-0.00935106	1.02181	-1.68686	0.450932	2.90974	-1.00214	1.18933	0.254688	0.442667	-0.871387	-0.502159	-1.16072	-0.0209533	-0.127967	-0.823787	-3.68127	1.07829
ENSG00000154319	0.699241	3.63706	1.23247	3.01398	-1.34912	1.84117	-0.727546	-1.63512	0.396842	-1.06804	-0.846248	-0.424607	-1.25978	-0.0149074	1.02434	-0.0924097	2.35119	-2.18844	-0.0663328	4.72407	0.246064	0.620712	-0.162389	-1.37396	1.24162	-0.868452	-1.8213	1.07365	0.0302403	0.589585	-0.312293	-0.436403	-0.0482729
ENSG00000154370	-4.86112	-1.11086	-0.456053	0.0248288	-1.57305	0.358792	1.69041	-0.0607662	-0.961994	-0.311441	-2.02248	4.51071	0.0785254	-0.461663	1.59242	1.334	-0.778388	1.47607	-0.976414	-1.00822	1.13164	1.17156	0.581323	1.03425	0.466055	-0.717305	-1.65549	-2.67565	-4.74715	-0.482313	-0.853677	-0.632526	-1.25139
ENSG00000151917	-3.20079	-1.73434	2.07412	-0.684923	-1.56174	1.03282	1.46935	2.82746	0.254299	-0.0840464	1.52802	1.91768	0.675035	0.327638	2.66658	2.1126	-0.709459	-2.88798	-0.234006	2.19507	2.04334	3.38088	-1.6422	3.03851	0.918335	0.852099	-0.890838	0.954425	-2.26811	-0.253371	-0.445864	-2.25826	-1.57251
ENSG00000132872	-4.11706	1.95653	0.825941	-1.18696	0.517439	0.706519	-1.22978	1.66152	0.255789	-1.40998	0.64239	0.607822	0.273918	0.979795	0.405059	0.120709	0.606376	1.15059	0.328225	0.0853694	-4.76883	2.32893	1.11034	-0.669106	-0.928711	2.43571	-0.151245	7.50096	0.961851	1.39526	-2.30507	-2.6514	2.53018
ENSG00000124785	0.161953	0.49292	-2.21052	0.226043	-0.33352	-3.33389	2.02541	0.767462	-0.150733	-1.63963	0.236935	-1.00807	-1.91931	-1.54976	0.485287	-2.19208	-2.12911	-0.414533	2.57901	-0.851167	-0.589476	2.72004	2.01953	-1.20034	-1.95532	2.93849	-0.224267	2.88568	-4.78213	4.39502	1.78669	1.31342	-0.728571
ENSG00000064309	-0.61621	2.81862	-3.60638	0.697519	-3.86778	1.8858	-0.164734	0.584816	-0.983467	2.12059	0.597046	1.99039	1.01693	-2.35242	-4.26712	1.34632	-2.24478	0.475725	1.62109	0.54622	-2.58633	-1.53652	1.04064	-1.98815	0.112835	0.942018	0.742525	0.800787	0.656118	0.475099	0.402274	0.400292	-1.58122
ENSG00000100167	0.911569	0.871822	0.222362	3.86991	0.789619	-0.0256495	-0.778207	0.779797	0.0815481	-0.120939	2.47451	0.914712	0.493381	0.172709	3.0243	2.5873	0.431491	-0.213901	0.336022	3.69586	4.028	0.15312	1.68513	-1.49706	-0.460869	0.729801	3.10777	1.87178	0.500105	0.515971	-0.350406	2.53162	-1.74209
ENSG00000198839	-1.19936	1.69127	0.557351	-1.08818	-0.0669248	1.33914	0.132297	-3.62637	-2.64976	0.651266	-0.509192	0.786679	0.293446	0.141599	0.82475	5.05663	1.07246	2.99011	-0.683018	2.42941	3.11495	-4.33805	1.83925	0.944648	0.753301	2.44973	4.59849	0.671978	-0.587443	1.60631	1.83268	0.267615	-0.577097
ENSG00000101017	0.990128	-4.08823	0.358365	-0.721117	0.437643	0.772738	1.66427	0.329273	4.32917	0.393707	1.14887	0.696021	0.57191	-0.274298	-0.140947	-1.11381	-0.941773	-0.0677782	-0.276	-3.54431	-0.630761	-0.588102	-2.43182	-0.164664	-0.23548	-0.752863	0.649147	3.3947	-1.93879	-1.69066	0.183436	1.42565	-0.243429
ENSG00000120885	3.58069	0.601881	0.229795	-1.12333	-1.30176	0.649976	-0.58958	-0.35667	0.76971	-3.63797	0.175704	1.49007	3.50012	-4.1203	-2.05141	-1.15092	2.48935	1.36632	-1.36283	-0.226751	-2.08884	-1.12835	-1.13475	-0.0950698	-0.472705	0.591569	-0.246173	-0.0524907	-0.152456	0.617476	1.34025	0.140479	-0.948949
ENSG00000101098	0.349811	0.991974	1.40933	0.259239	2.04106	1.56061	-4.82082	3.82389	-1.81317	0.824834	-3.9709	2.34413	0.533712	3.23526	0.504979	-1.31634	0.972004	0.446721	0.497761	-1.96297	-0.1392	0.465498	-0.398478	-0.123252	-0.44511	-0.0624888	0.187295	1.79736	-0.0863908	-3.74012	2.32632	3.16823	2.04139
ENSG00000124249	-1.62487	0.375636	-0.848787	-0.329257	-0.278543	-0.492244	-3.40368	-1.41145	-0.40008	0.553767	-0.61758	3.20811	-0.218993	-1.20297	-0.548816	-1.85135	-0.408131	2.19464	-0.717695	1.25678	0.534064	5.75218	0.821612	1.36187	3.00048	2.00537	-1.5309	-1.02646	1.78306	0.776121	-2.88794	-0.159983	-1.52365
ENSG00000064205	-5.29812	-3.07266	-0.401049	-1.62836	-1.68815	0.0281421	-0.575725	-1.23691	1.69708	0.752279	-7.60542	-2.04005	-3.17887	-2.65735	-2.00058	2.27174	-5.29879	-1.747	-0.447894	-1.80236	-2.21324	-0.775948	0.893796	-1.60212	-0.634631	-0.490746	-1.03427	-0.831473	-1.8716	-0.262321	-8.07671	-3.12824	-2.72239
ENSG00000134533	-0.282887	0.688638	0.939679	0.633765	-1.21159	0.427614	0.590403	0.388823	0.391896	0.421553	0.628297	-0.366587	-0.521299	-0.771997	-0.0302097	0.175543	0.33016	0.345581	0.110691	2.61326	-1.72847	0.337633	-0.723586	-0.148721	0.100617	-0.503056	5.15375	0.595693	3.19625	0.375536	2.60144	0.110413	0.392802
ENSG00000147571	1.90353	0.807405	0.306002	0.608253	1.24254	0.211663	-0.0107838	-0.0679709	0.114081	0.269214	-2.24544	0.265097	2.28964	-0.0380571	0.735826	0.954508	-2.50881	-0.429881	-5.58048	-0.266773	0.899821	-0.0287553	1.08821	-0.0371803	0.730101	-0.056369	-0.564249	-0.0431771	-2.85831	0.0272854	1.86327	0.308297	0.852124
ENSG00000183722	-1.00578	-0.926791	-0.0634707	-0.107027	-0.619029	0.00702014	-0.804521	-3.60231	-0.177448	0.450642	0.230957	1.43928	-0.0491251	-0.370597	-0.939909	0.871477	0.595921	-0.452624	0.672899	-0.970875	-0.838735	0.405747	0.203944	-2.24362	2.24276	-1.66194	-0.213355	1.73178	0.499284	0.647837	0.722878	0.4071	-0.486553
ENSG00000067369	1.70109	-0.141593	3.5361	4.12271	-0.911513	-0.685765	2.93307	3.21689	-0.571235	-3.76354	3.36303	4.40106	0.379632	2.2489	-1.50783	-0.155382	-0.0886509	-3.35905	1.67446	1.93879	1.10438	0.887959	3.66578	2.10378	2.00853	2.38779	2.89489	-3.47914	1.25278	0.408886	-1.9328	0.194394	-1.94721
ENSG00000138759	1.18441	1.33778	-2.25341	-0.799196	3.68397	1.39026	0.361518	0.650998	-1.34671	-1.40856	0.105951	3.45321	-2.68424	-0.32975	0.437713	0.189015	-0.891203	-1.96076	-0.526693	2.0033	0.847515	-0.709932	-3.27122	1.11463	0.760661	-3.31781	0.219513	0.0547927	0.47172	-1.13526	-2.65631	-3.44271	-0.550191
ENSG00000164023	-1.9778	0.919276	-0.781539	1.1093	0.0853468	1.72565	-2.05129	-0.853998	0.804322	-0.634032	1.31152	1.81043	1.3486	1.89545	2.57228	2.35142	2.1465	-0.686092	-0.964124	0.70408	2.18943	-3.63643	1.48527	0.684928	1.16386	0.728618	0.875423	1.23838	0.404356	3.20801	-0.130016	-1.40473	-3.7624
ENSG00000101204	-0.335189	-1.85794	-2.99315	-0.454639	0.813441	0.655498	-3.21547	-0.603621	0.913142	-0.659775	2.08453	-1.00268	-2.9414	3.18036	5.03929	1.61368	0.188421	0.472255	-0.153835	-2.00686	0.743499	-4.70924	1.79572	0.248873	-0.353106	1.88234	-0.0144855	-3.84204	0.391077	-0.971241	-0.413187	-0.488152	-0.8514
ENSG00000163923	0.505157	0.887124	1.98304	-1.22522	0.250907	-0.228182	1.23543	0.42027	-5.13928	-6.47166	-1.49088	1.85309	-0.512012	0.705775	1.10888	-5.90395	-2.61968	0.760584	0.617634	1.78248	-0.837194	0.342228	0.557781	-0.122648	0.718385	-4.60357	-0.945305	1.45494	-2.78288	2.47535	-1.90754	-1.42982	-0.607068
ENSG00000005249	0.480849	1.09362	0.352501	0.74767	1.06607	0.0996032	-0.502374	2.97789	-0.137139	0.170603	1.29723	-1.77605	-0.162587	0.247123	0.059394	-5.69991	0.607728	0.366314	0.820583	-0.132423	3.4196	-0.167802	1.25306	-0.292406	-0.341818	0.599263	-0.264479	1.70732	4.21328	-0.290615	0.108923	-0.978892	2.68336
ENSG00000196678	6.07033	-4.2243	0.223754	-0.939877	0.236194	-0.177689	2.70801	-1.01497	0.412855	-1.10908	2.26482	-0.815225	-0.109311	-0.121581	1.06659	0.318306	2.61242	0.491981	0.896193	-0.633575	0.122809	0.599029	1.78738	-0.0246359	-1.00647	-1.79987	-0.00762427	2.96859	0.153591	-0.147645	1.88745	-0.244842	-0.40826
ENSG00000178922	-0.892554	-1.17428	0.0338672	-0.442698	0.89263	2.07523	0.251126	0.809839	3.38708	-1.73107	-0.0994848	-1.43054	2.19507	-1.49821	-1.61727	-0.469517	-5.11076	-0.989264	-1.93495	1.9346	-0.59132	0.893695	0.135232	0.536121	1.41506	-0.144136	0.293473	2.00322	-1.0834	1.00852	-0.290848	0.491872	1.08799
ENSG00000160193	-0.454095	1.2492	-0.257737	-0.0020797	4.62105	1.15347	-1.20472	-1.34569	0.695538	0.0379912	-0.108672	2.09132	-2.5368	-1.52135	-0.789269	-0.886123	0.172583	-2.15287	0.104339	-1.57726	0.0063157	0.632576	-1.6805	1.58779	0.667699	-0.817504	0.362645	-0.94583	0.279147	1.75012	1.62469	-1.95686	0.970485
ENSG00000157933	-3.46123	-0.201408	0.343538	-0.870337	-0.91043	-2.19767	-1.52997	1.18833	1.21031	-1.28951	1.26612	-4.10204	-5.03069	-1.98267	-1.02274	-0.294753	-1.4025	-3.11028	3.22237	-1.46642	1.90728	0.623713	1.74833	-0.836566	0.577644	-0.389424	-1.32026	2.50742	0.267819	0.602404	-1.66044	-5.01955	2.27221
ENSG00000175077	-0.938012	0.493858	-3.71395	3.22076	-2.04736	0.448985	0.259041	-0.748214	0.1518	-0.171115	-2.99463	-0.350366	-1.41254	-0.0235061	-0.0376532	0.442435	-0.158845	1.28744	3.85011	-2.98743	-0.647058	0.606381	-2.13454	0.627309	0.206377	0.235137	-1.32007	-1.9849	-3.36291	0.0477667	-0.197365	-1.50999	-2.08526
ENSG00000090863	-3.83456	-0.401176	0.93485	0.553077	1.34099	1.80777	1.67268	-0.812452	-0.333355	-2.82124	1.30271	1.53286	1.93176	0.775832	4.20212	0.62125	1.2447	0.0149644	-0.655479	-0.627443	0.417528	0.428045	1.0588	3.47662	2.54896	1.15815	-0.428352	3.63124	2.93826	0.506694	0.0577291	1.4569	3.14095
ENSG00000123358	0.555251	0.391652	0.248066	1.26945	0.801725	0.662143	0.40302	-0.130508	1.46993	0.605201	1.99688	3.5326	0.388134	0.494917	-3.35248	1.88504	2.41471	1.07798	-0.606803	2.18724	3.91747	1.24522	0.188647	0.181663	-0.542175	-1.51136	0.681505	0.839588	1.60223	-0.823623	-2.95232	-2.05586	-1.76582
ENSG00000179796	3.88675	3.91491	3.5741	0.333938	-1.28557	0.955204	2.46995	1.31438	-2.8687	-2.62821	0.280895	-0.171949	2.91424	-0.214878	0.586978	0.158975	3.76131	0.73156	-2.52276	-0.507062	-1.09193	0.996104	3.7972	-0.00402615	0.0114956	2.72226	1.27936	2.47426	4.7456	-0.14013	0.117873	-1.27762	-0.96051
ENSG00000145087	-0.149538	0.603956	0.754814	-0.873169	-0.266149	4.64479	-0.26178	0.0824913	-2.22787	0.777138	3.1023	-3.49491	1.2576	-3.38867	-0.740794	-1.47137	0.774561	-0.118086	-6.66652	-1.24759	1.92364	-0.0411989	0.731511	-1.60933	-1.83447	-0.709507	-2.22392	3.66748	-0.447965	1.21358	-0.279731	-0.288216	-0.4982
ENSG00000161091	2.37942	0.828572	0.112048	0.210126	0.249797	1.56565	-0.723921	0.0934771	-0.365948	-0.926356	0.320682	-1.4894	1.12664	-0.328496	0.810834	1.49239	0.327498	5.31329	1.23375	0.74455	1.41982	-0.312184	0.546774	-0.0400387	-0.106209	0.74516	-5.55456	1.57078	0.272202	3.82778	-0.235733	0.346492	-3.87138
ENSG00000111913	-0.562061	-0.0487973	0.101169	0.382777	-1.13654	0.181662	-0.647553	0.907275	2.79975	-0.48846	-1.28884	-2.86226	-0.346325	0.0995877	-3.31383	2.09826	0.41015	-0.68319	0.772609	0.0169511	0.712443	0.729703	-1.03964	-0.905329	3.93163	0.114662	-7.42182	-0.0184559	-5.16087	-0.15479	-0.334716	3.60217	-1.0351
ENSG00000072422	-1.19137	2.0933	0.695402	0.475233	0.996985	0.570487	-0.869468	0.63828	-2.14841	0.523274	-1.63068	-0.303865	1.96252	2.13734	-1.72314	2.05695	4.94465	1.28592	0.139483	1.02843	-0.33539	0.97848	3.05754	3.04	-0.330598	3.94919	2.33333	5.56717	2.33128	1.50219	1.17393	0.340136	0.626227
ENSG00000100362	-0.802999	0.424055	-2.16919	-1.27087	-4.59241	1.04352	-0.981125	1.27567	6.34816	7.01103	1.1184	2.2987	-0.940254	-0.377758	1.1937	-2.19978	-6.2042	-2.98646	0.532401	-0.120031	-0.247681	1.65695	0.464287	1.76647	1.20595	0.534512	3.03106	2.40141	1.24576	4.06957	-1.75812	0.446007	-2.54112
ENSG00000116151	2.55109	-0.406749	1.76242	1.60576	0.604182	-1.49863	-3.36029	-0.577315	2.65034	2.58548	1.38089	0.169373	4.17395	0.622137	0.57306	1.5073	0.0891779	1.16151	0.535549	-1.98596	-1.56667	-2.72201	-3.41206	-1.15208	0.461547	-1.35511	-0.814899	2.02531	2.62983	-1.98944	-2.60982	0.266165	-0.913243
ENSG00000197798	-3.51191	-4.54743	-2.82786	-0.710568	1.32895	0.738878	2.31437	3.38424	2.05658	-0.831239	-1.65879	5.18221	0.692191	-0.586257	2.00266	-1.12959	0.123162	-0.424335	-0.316379	0.655816	-1.40166	-0.558291	-0.233184	-2.91205	-2.1688	0.626236	-2.40876	3.02337	-2.49359	0.951577	0.452891	-0.770757	-1.16871
ENSG00000066654	-0.524891	0.996731	1.31887	-1.02149	-1.95058	-0.549163	-0.128323	0.0343364	0.970949	0.425634	0.215055	4.0535	-0.746728	-1.09914	0.847026	0.954962	-0.482032	0.518085	-3.13777	2.20378	-0.24644	0.0797531	-1.12691	-1.38099	-0.205718	-2.42779	5.14367	0.0563152	0.577643	-0.463505	2.10631	-0.159767	0.340506
ENSG00000066926	-0.283209	-5.5967	0.88428	1.21224	-0.821632	1.62227	0.399616	1.31714	4.15633	3.17625	-0.629195	-2.85114	-0.264914	-0.976307	2.24553	0.415064	-2.57469	1.1884	0.0420095	-0.362538	-3.02013	-0.859856	-1.78924	-0.40216	-1.06008	-0.577876	-0.249402	1.97238	-0.619617	-2.54703	1.02337	-0.3676	1.12111
ENSG00000178718	-0.00691204	2.8793	0.522809	-2.01144	-0.486295	1.70976	-0.676203	-0.668517	-2.57404	-1.0301	1.59767	6.64732	1.29147	0.576246	2.29738	1.18329	0.402162	0.549538	-1.57188	0.605698	1.37112	0.781003	2.77741	0.494966	-0.356073	2.05427	-4.02729	2.47862	-2.18647	-2.66276	-0.830503	-6.8475	-1.05032
ENSG00000105219	-1.43838	0.920536	0.467115	-1.41872	2.11324	1.02567	-3.46652	-2.46436	3.60246	-0.551338	2.04317	0.517797	-0.00220169	7.74423	0.0326778	-0.538666	-0.854274	-0.16019	-2.12269	0.880684	1.80715	1.57424	1.25664	0.596035	0.68775	0.765938	-0.105326	5.0473	0.162279	0.419443	0.463502	-0.556237	-0.284532
ENSG00000171503	-2.73023	0.681884	1.54632	0.905565	0.380853	-0.973611	1.43561	3.47199	-0.0431507	2.12235	0.097821	1.36086	0.962003	-2.20221	-0.359753	-0.13603	-1.34909	-1.28417	-0.147994	-0.501889	3.77982	3.08115	-0.735026	1.18778	1.33133	2.24857	-1.15978	-0.106203	0.111484	-2.71508	-0.0631969	0.981495	2.54459
ENSG00000197858	1.28098	1.322	2.67396	-4.69552	0.26271	1.3518	2.09502	-0.105286	2.30403	0.460474	2.34952	-1.61293	-0.0213707	-1.60911	-1.19471	-1.73626	0.235654	-1.37541	2.32001	-0.493687	1.86096	-2.80994	0.182332	2.4415	2.00767	0.215589	-1.44291	3.76774	-1.34997	3.87738	-1.33859	-1.46101	-3.03803
ENSG00000162704	-1.04603	-1.07057	-1.24083	-0.388124	-0.928963	-1.16994	-1.95827	-0.294163	-2.33198	-1.40871	-3.63518	-0.158613	-3.62334	-0.0484591	1.8554	0.0168751	1.65274	-0.139482	-0.877365	-3.14918	-1.75314	-0.158638	2.71605	-0.485548	-0.689793	-0.0832084	-0.344307	1.22236	0.448971	1.15307	2.60006	-0.0875401	0.0456224
ENSG00000163702	-1.70463	0.311719	-4.47929	-1.21522	-4.05351	-1.28655	-1.21073	-1.24148	0.630181	-1.6867	-2.20417	-0.506698	-0.562	-1.22993	-0.378087	-1.80693	-1.04053	-0.199243	-3.26166	0.695325	0.868888	-1.84131	-1.7345	0.366338	-2.30097	0.781887	-0.361401	-2.64148	-1.9676	-2.40212	-5.65173	-0.931618	-0.311964
ENSG00000163013	-0.0331464	0.187901	0.436403	0.197947	0.498104	0.406515	0.410814	-2.53883	1.07706	0.0159619	0.491824	0.106903	0.183573	0.441215	-0.0513175	0.406438	0.433942	-0.4745	0.0391173	0.0951735	3.34176	0.744985	0.923611	-0.0828684	-0.0436001	0.167471	-0.314225	1.97393	-0.453938	-4.58454	1.36662	0.622362	-0.378479
ENSG00000122012	-0.721068	0.213626	0.0687426	-0.309674	-0.796673	-2.53425	3.77789	1.77887	3.12781	-0.144345	-0.438767	0.537232	-0.466414	-1.22525	1.31967	-2.52285	-2.82791	-0.340272	0.944701	-0.176457	1.00125	1.94255	-0.929993	0.215096	2.39105	-0.527015	0.0177716	2.22812	-0.785331	1.76576	-3.04216	-5.4881	3.33511
ENSG00000015133	-0.0990599	-1.22299	3.31275	1.48604	3.91245	1.58253	2.33279	-0.267696	0.411959	2.74112	-2.43873	1.05559	1.2867	-3.79637	-1.24903	0.304989	1.00473	-1.53817	-1.01551	-0.331182	1.71397	-0.653413	-0.406062	0.152548	-1.30364	1.02818	2.18271	-0.56748	-0.315089	-3.28993	1.13815	2.34073	-2.58689
ENSG00000185518	2.79395	-1.0368	0.985732	-0.050047	-1.14133	0.444869	-0.057309	-0.20439	-0.908879	-0.253535	-3.27374	0.737385	1.06985	-2.96792	1.61857	-3.35146	2.34089	3.65128	-0.46317	-1.2454	1.22289	1.08587	-0.525875	-1.54914	-0.117164	0.934806	1.7334	3.55844	0.906166	0.923392	1.33257	2.20603	-5.66904
ENSG00000058804	1.63794	0.237731	0.043759	1.02599	-0.0995719	-0.486142	-1.65455	0.169969	-3.16692	0.950038	0.682912	0.824187	0.370485	-0.0643929	-0.336171	0.823421	-0.361038	0.768211	1.62826	0.531279	2.17316	-1.46195	-0.518842	-0.0875666	-0.0254393	0.276763	1.89956	-0.745264	-0.067922	1.81756	0.607435	0.184305	-1.23879
ENSG00000047579	3.92632	0.043825	1.76271	0.981879	1.95388	0.254041	-0.282176	1.73092	1.47693	0.988969	1.79675	-0.39989	0.0431289	0.388447	1.13285	-2.48368	0.627116	2.21199	-2.05171	2.3443	-4.87054	1.1455	1.66543	-0.194342	-0.599056	0.5278	-0.983462	4.09367	0.181911	0.449006	2.00965	1.2592	-3.38264
ENSG00000124608	1.35766	1.71151	-0.848215	0.267105	-1.11587	-0.443406	-0.587055	1.32633	0.93413	0.928575	-0.474372	1.42549	-2.50596	-0.629404	-1.20907	-1.58412	2.31937	-2.97952	5.94296	1.29636	-0.0429259	2.02433	1.18664	-0.856328	-1.59466	-1.65883	-1.27879	1.87456	-1.69457	-1.39131	2.00691	0.195287	1.40622
ENSG00000152217	-0.988571	-0.108763	0.43946	-0.320313	0.0170077	2.43262	1.2956	-0.337699	1.42352	0.620053	-0.215639	0.0810058	-0.579152	-0.807287	0.125996	0.199254	-0.567951	3.69152	0.740548	-1.85932	0.13491	-0.204716	1.29829	-0.269796	-2.08409	-1.00608	1.1268	-1.4155	-0.246265	0.158772	0.346775	0.502514	0.747072
ENSG00000146221	1.31169	-1.08971	-0.893149	-1.42387	0.55824	-0.0124228	0.315778	-0.726497	-0.605561	0.00502477	0.496615	0.167832	0.606545	3.16398	-0.0689761	0.150269	1.89894	-0.711236	0.651773	-1.13721	-0.0280136	0.366964	-0.243671	0.482659	-0.77499	-0.455812	0.449041	2.1856	0.203613	-1.51915	-0.410078	0.204716	-0.0207746
ENSG00000146352	-2.19786	-0.0483677	1.79847	0.234411	0.227352	5.33895	-0.94802	0.703975	-1.93979	1.03285	1.02673	-1.68264	0.958393	-0.594793	-0.476883	-1.18688	-0.32358	0.503297	-1.37326	-1.57132	-0.635008	-0.468633	-1.26406	-0.282202	-0.183473	0.353073	-1.93366	4.67326	-1.62558	0.934202	-1.30947	-1.54585	1.53235
ENSG00000108960	1.58249	-0.251184	-0.0568204	-4.22479	-0.37899	0.637356	1.86781	2.49284	2.62276	2.71094	0.895876	1.89806	-0.479848	0.451991	1.83326	-1.08829	-2.01609	-0.00149853	-0.246661	-0.231551	-1.609	-2.00012	1.20472	-0.234237	0.0671155	2.14628	-1.0924	2.42851	-0.392381	-0.495498	3.0793	3.099	-3.10337
ENSG00000168843	-0.483586	0.0364733	-5.4217	-0.318856	-1.17236	-0.0568097	0.223167	4.94166	-0.193583	-2.7436	-1.56288	-1.052	-2.23945	1.04899	0.95135	-0.879055	-4.07575	2.83255	-1.06381	-2.19994	-0.561309	0.842064	-1.50674	-1.66402	-2.79875	-1.70157	-0.896262	4.81866	-0.447897	-0.94939	-0.875948	0.286968	-0.716441
ENSG00000182667	-1.32014	-1.32385	0.847543	-0.751337	-3.27857	-0.320806	-1.95127	1.65446	-1.85413	0.591989	-5.03995	-2.87023	0.96495	-0.634671	0.245805	1.53018	-3.05024	-0.635963	2.33924	3.58833	1.46627	1.48772	0.508757	-0.0847651	-0.302909	0.915023	4.97853	-3.70085	0.554233	-0.286904	3.18904	0.60135	-1.1426
ENSG00000139926	2.38692	0.299279	-3.30068	0.322939	0.379386	-0.652696	3.0048	0.899925	0.372081	0.610001	4.96106	-0.924709	-0.659467	0.770663	-0.215759	0.209872	0.172961	0.575883	3.33931	-0.907261	-0.576463	3.04244	3.90594	-2.31424	-0.102409	-1.11162	-1.49578	2.56187	3.4953	0.655521	1.45039	1.10851	2.28818
ENSG00000126088	-1.77606	1.50458	-0.454577	0.70362	-0.628825	1.70653	-2.03054	-0.656208	0.138641	-1.40069	0.972218	2.62653	-0.0120393	-2.0513	-3.15379	0.194408	3.75133	3.01661	-0.126955	-2.1097	-0.837676	-0.412529	0.562398	1.11613	0.960623	1.01906	0.0653226	0.802666	0.359822	0.840893	0.467501	0.298465	0.0688298
ENSG00000093167	-0.888583	-1.72445	-0.75125	1.99692	-0.0595929	-2.03579	-1.65683	-1.68961	-0.651696	-0.414464	-2.40597	0.395391	-0.00656684	1.10906	-0.789235	-1.14621	0.0688651	-1.75461	0.547257	-3.63019	-3.42732	0.159275	1.12872	-0.712177	-1.51274	0.494903	-0.181641	-1.46873	-2.07103	-1.23748	-0.0318102	-0.26703	-0.350291
ENSG00000092010	-1.63804	-1.00706	0.56401	0.486597	-1.56786	1.78	-1.80429	0.484186	-2.17496	-1.02101	-0.05669	0.50418	0.46573	-0.682624	0.5376	1.57881	2.95621	2.12395	2.42802	2.69662	-1.20241	-1.22306	-0.804418	-0.56172	-0.0700014	0.328483	-0.826009	2.13542	0.865879	0.634384	0.445496	0.0936317	-2.22729
ENSG00000117691	-1.03395	2.04523	3.09733	0.181544	0.37511	1.82493	0.97325	0.695945	-0.00273576	0.200656	1.28829	1.04607	1.70946	-2.60556	0.201143	0.816364	0.867645	3.57199	-0.436216	2.15883	-3.95617	-0.0821956	-0.793338	-0.212536	0.355099	0.417588	-3.4223	3.55705	-0.254688	-0.590993	-0.0657709	0.203401	-0.347534
ENSG00000117266	-1.11587	-0.060362	-1.23876	-1.80287	-1.12211	3.53302	0.847817	0.226916	0.62594	0.864664	-0.234302	-1.24857	-0.387094	-2.09966	-0.541502	0.748575	0.290049	-1.80188	0.225381	-0.915823	-0.406045	-1.24467	-2.26304	-0.35649	-1.00331	-0.702977	-2.51886	0.475203	-1.45	0.468564	-0.751614	-0.308638	-0.742587
ENSG00000016602	-1.27966	-1.57218	1.47116	-0.483643	1.48776	1.79919	4.61332	2.84459	-1.78896	1.14476	-0.31242	-0.346211	0.215133	0.269219	-0.100359	1.14644	0.982362	-0.505789	4.13837	-1.62894	2.66051	-0.243304	2.72367	-0.301069	-0.176476	-0.285175	-0.593826	1.06202	-0.847361	0.883173	-0.820365	1.66444	-1.93278
ENSG00000204767	-0.0435188	-0.265919	1.12569	5.08748	3.06716	0.449735	-0.157367	-0.398868	-0.148867	-0.28397	0.0438209	-0.256592	1.85597	0.306386	-0.03278	-2.75296	2.15182	0.255413	-1.11387	-0.322668	1.66208	0.715042	-0.797803	1.07025	1.1699	0.942479	0.277967	-0.920102	0.222473	-2.15761	1.48532	1.21481	0.207864
ENSG00000161267	-0.27102	-0.667393	-0.996362	1.03769	-0.706238	-0.599934	0.884235	-0.650566	2.9467	0.528901	-0.585769	0.0298256	-0.803384	-4.61875	1.04169	2.98791	-1.03183	-1.52301	-0.888557	-1.28311	-3.11036	-0.0847389	-3.28816	-2.12399	-0.454129	-0.543188	-0.601669	0.086329	-2.41915	-0.379745	-1.01549	-0.309531	-0.712162
ENSG00000079616	2.55336	0.159773	3.04758	-0.399844	-1.28263	1.55931	-1.3636	2.83242	-1.15577	-1.83101	-3.833	1.72159	0.405298	-0.313659	-0.892094	2.07973	1.82351	-2.22988	0.504759	-0.415947	-1.57642	0.339955	-1.48217	-0.0993664	0.544733	1.64947	-1.39209	2.45125	-0.199147	0.65595	-0.478967	-3.3107	1.40419
ENSG00000138050	-1.38768	-2.68658	0.155262	-2.16999	-5.92416	1.53469	1.24979	4.57423	-1.61933	0.472962	-0.660428	-0.375151	0.172783	0.536472	-2.27128	5.71539	-4.01096	1.67035	-2.49105	-0.0224845	1.22844	-1.33074	1.90193	-2.3237	-1.95999	0.742511	-2.32363	1.47724	1.80537	-0.833545	-2.99769	-2.36532	1.91536
ENSG00000103316	-0.657933	-0.451667	1.46396	1.22094	2.68484	-0.908528	-0.194823	1.32216	0.370963	-0.160652	4.02412	0.493319	-5.79749	-0.459997	2.96363	-0.709163	-1.34879	0.0982533	0.503078	1.12871	0.710141	-2.88374	0.319694	-0.0344272	-0.381819	0.910423	2.89794	1.04752	-0.298812	3.4591	0.819256	1.43318	-1.33882
ENSG00000187122	-0.388292	-0.111733	-3.01716	3.95879	-1.48611	0.598067	0.938383	3.02066	0.161301	-0.331096	2.19117	2.7701	1.54728	1.29188	-0.46477	0.282173	0.598805	-1.51574	-0.235696	-0.39936	-0.618098	1.03661	-1.39414	-0.509373	-1.44976	-0.861053	-0.700706	-1.20991	-2.26604	-0.941939	1.28121	1.04984	2.40366
ENSG00000100124	-0.892291	-2.81454	3.23303	-0.27161	-2.33394	2.15786	0.255985	-1.4074	0.195954	0.998614	3.42343	-1.03466	-1.76243	-4.63925	0.979617	0.426109	-1.53217	-4.07283	-0.0264874	-0.952765	0.0680111	0.461939	-3.49816	0.891673	-0.393888	1.65976	-0.501922	-1.31893	-3.53123	0.270744	1.76882	-2.00073	-0.208997
ENSG00000166676	-5.09979	-1.82223	1.62041	-1.564	-1.62485	-2.43945	-1.15446	-1.40586	-0.174246	0.915997	-4.77338	1.01741	0.578727	-1.44344	0.109961	-1.78591	-3.49623	-2.89848	-0.673263	0.272809	-2.24078	2.86354	-1.07948	-1.00448	1.14156	-1.40333	1.16938	-4.2604	0.298025	-0.824785	0.383494	-1.14755	-1.29189
ENSG00000114125	-0.624691	0.295487	0.588817	-0.358829	-0.189955	0.931039	1.95522	-0.165808	-2.94695	-1.94098	1.79541	-3.86467	-1.10077	-1.93548	0.0243004	0.530987	-0.0854263	0.443089	2.14246	-0.495214	-0.2777	2.11362	0.525918	-0.315445	0.213911	-0.102158	-0.21384	1.39281	-1.57122	0.986732	-0.252013	0.511735	0.429105
ENSG00000087263	-3.46868	-1.90905	-1.67241	-2.07669	3.76784	-0.754523	1.89886	2.67115	-0.835431	0.335825	-0.258059	4.28787	-1.09831	-0.766098	-5.6649	-0.915815	3.94732	-1.79505	0.377411	0.750792	1.89615	4.62129	-0.199755	-0.647738	-0.105898	-0.118149	-0.572972	1.24462	3.65236	-1.1342	4.11166	6.30501	2.06555
ENSG00000043462	0.499024	2.85846	3.13113	0.440276	5.25352	1.80446	2.44228	4.50394	-0.497059	-0.740491	-0.275558	1.97124	1.15026	0.559801	-0.343908	2.02863	-0.53432	2.65551	1.87714	6.68132	2.71568	-2.47474	-0.573061	4.56067	3.59499	0.353591	1.66255	1.0391	1.09019	-0.295114	0.718082	5.45727	1.77274
ENSG00000068383	-5.11864	-2.23942	-3.12787	-2.41099	0.799398	-3.7981	0.155029	1.17478	-1.35544	-0.259626	-1.60479	-0.339595	-1.3537	-3.0507	1.25086	-3.94105	-0.544259	-2.06046	1.42167	2.61513	2.40406	2.16817	1.45438	-1.31867	-0.200077	-0.360899	0.219247	1.70635	2.59468	1.50815	1.38066	1.62648	-0.78015
ENSG00000187676	0.550316	0.935796	0.617507	2.4137	-0.892418	0.891537	-1.86928	0.129003	-1.86168	0.66132	0.867379	1.25214	0.656648	1.23053	2.10257	0.733635	0.299897	1.80222	-1.47762	0.686234	0.385621	0.821103	1.18633	-0.28831	0.435946	1.12292	0.305157	0.642063	-0.266827	1.44879	-1.4498	-1.33038	2.92436
ENSG00000109158	-2.99684	0.457814	2.48122	0.362191	-0.231883	5.43812	-2.598	1.56972	-1.46716	3.59361	-0.47975	2.24838	-0.63144	-1.42589	-2.40119	-2.30822	-0.912396	1.43304	-0.250212	-1.36298	-0.912561	1.1097	-1.47624	0.293792	-0.987363	0.116051	0.136965	-0.965338	0.0217636	-1.30044	0.682513	-0.93971	0.813346
ENSG00000115257	-2.40684	-1.93769	0.209923	0.440759	-0.411439	-1.04054	-0.878358	1.42019	-0.269913	-0.612938	-5.1745	-2.00732	1.07051	0.139653	-0.253755	0.194517	-2.625	0.84858	3.35442	-1.31406	1.0564	0.224661	-2.05402	-3.18842	-1.70068	-0.880175	-0.575837	0.798526	-1.8856	5.15257	1.20146	-2.00673	2.48946
ENSG00000105737	-0.465978	-1.46332	1.02064	0.613448	2.29174	0.0270772	-1.07665	2.07992	0.332864	-0.567884	0.578665	0.983728	1.12687	1.0194	1.22542	-2.2942	-0.269407	-0.0438864	0.36	1.20402	-6.15858	0.206574	1.32702	0.198824	1.64753	0.725087	-1.98574	2.28098	1.41712	0.286476	0.393817	0.336267	1.32814
ENSG00000146109	-0.584074	0.43479	2.67447	1.16842	0.86427	1.04627	0.56599	-0.00400518	3.22609	0.938134	0.551129	0.0954813	0.254748	0.0739051	-1.64639	-0.0942551	1.27536	-0.503773	0.857809	-1.03389	1.16487	0.348884	0.560595	-0.468083	0.214006	-0.250173	-0.111095	-1.63165	3.96861	-2.30634	0.475308	-0.434407	-1.84948
ENSG00000047346	-3.89416	-0.665993	3.16268	0.0143111	2.48335	2.37736	1.26872	-1.58182	-0.92597	0.0631588	0.298935	1.29029	-1.36812	-1.11204	-3.2588	-0.8246	-2.52362	1.22232	1.91358	0.663429	-2.60874	0.588052	-2.17694	2.2451	-0.687168	1.09343	-0.154335	0.865057	-1.0086	-0.0683833	-1.96111	3.15691	-0.62803
ENSG00000089053	-1.67649	1.85209	0.220193	0.267312	1.52475	0.935343	1.13365	0.328836	0.0489078	-1.20322	3.68337	1.27615	0.219283	-2.27481	0.49566	0.671184	1.18056	1.33781	4.32928	0.282159	1.72824	4.22402	2.00134	0.36584	0.235477	1.00631	0.443471	2.88643	-2.77307	-5.61699	5.41578	1.4673	0.352923
ENSG00000115648	0.920924	-0.0104326	-1.54919	-1.57345	2.93649	-0.661366	0.249708	0.0102865	-2.49026	0.321806	-0.467288	0.192124	-0.281144	-0.422226	-5.61378	-0.0292911	-1.01679	0.090682	0.536606	-1.28856	-0.306003	1.39132	-0.00668134	1.8659	-0.716308	-0.199285	0.442479	-0.151939	-0.376091	-0.165982	1.43838	0.570912	-0.126812
ENSG00000162931	-2.09298	-0.269079	-0.44946	0.12426	-1.1003	1.75044	0.384759	0.971999	-0.774776	-0.92036	-0.49057	-0.391518	1.44947	-0.0400492	2.5346	1.60175	1.21622	1.19026	0.488702	0.264864	-2.25036	-0.240877	1.0877	-1.41099	1.27386	0.718056	-1.37565	-0.993658	2.74419	-0.543062	-0.591804	-1.20598	-1.21637
ENSG00000089847	-0.639968	-0.346935	0.86789	-1.12355	-1.10454	2.49805	-3.91423	-0.211585	-2.14335	0.945426	2.88271	-1.27536	2.6026	1.88389	-0.447691	1.70901	1.01549	-0.939978	1.21865	-0.015608	-0.818613	-2.50598	-1.84074	-1.71068	-1.47904	1.43139	0.198346	-0.143715	0.833316	1.63171	0.477257	0.710456	0.6329
ENSG00000175352	0.532453	-1.15519	0.633122	1.22196	-1.95451	2.27333	-0.441827	1.50994	0.776466	-2.32077	1.57507	0.0869734	-1.26499	-0.905612	1.18598	-0.380998	2.46232	1.74785	-1.1433	1.2576	-4.71134	0.32967	-1.66576	-0.0476117	-0.556759	-0.149043	1.83194	-0.341415	1.37027	0.116785	3.34518	1.23163	4.08112
ENSG00000070413	-3.42895	1.13321	0.471591	-0.424581	0.564189	3.08222	-0.970491	-4.20476	3.07721	0.555678	0.558495	1.97157	-0.135101	-1.06816	1.16047	0.746633	1.66022	-2.98061	1.30808	-0.76436	0.319004	3.60926	0.521287	1.95659	-0.236067	-1.25189	2.42639	-0.0886182	0.366619	3.98652	-2.03922	-0.722522	2.25952
ENSG00000121060	-0.437843	-2.57381	-0.367665	-2.40664	-1.10764	-0.198073	-1.5221	0.224537	-2.50434	-0.499742	3.57163	1.27816	-1.48107	-2.91084	0.489418	0.127484	0.132727	1.44945	0.86543	0.39246	-0.796442	-0.395311	-2.12746	0.879901	-0.128492	0.467617	-0.312339	0.514925	-0.798389	0.597521	0.0302598	-0.318872	1.30966
ENSG00000101463	0.686915	3.60413	3.99896	0.443932	6.7809	-0.54487	3.34926	2.42294	-5.06682	-2.45954	0.0992909	2.06771	5.57645	1.13363	-1.58282	2.33758	-0.729839	2.65067	0.474671	-2.50503	-2.53978	2.15254	-2.28315	2.2801	0.976872	2.61774	5.27309	1.67308	2.10218	1.98028	0.323497	0.605479	0.00268473
ENSG00000100239	1.04286	3.03888	3.56174	-2.92494	2.54602	2.62144	2.32619	-0.359814	1.54258	2.32265	1.61511	0.844582	1.71103	1.90772	0.577381	1.20847	0.419297	2.13383	1.72645	0.55555	-1.64429	-0.499771	-2.25977	7.54198	2.74695	3.97369	1.98565	3.58061	0.999292	0.648967	-0.705289	1.36812	-0.318948
ENSG00000079156	-1.28236	-0.719189	-0.700595	-2.53889	-0.693373	-0.0400518	-0.575789	0.504185	-0.144014	1.24202	0.321539	0.305456	-1.12965	0.358239	-0.476396	-1.60922	1.44711	1.56821	-0.355185	2.06095	0.0775127	5.08649	-1.21359	-2.10319	-0.768346	-1.66308	1.86734	4.95449	-0.460259	0.211343	1.29681	0.905087	-1.1127
ENSG00000164877	0.365337	2.25882	-1.71401	0.517405	-0.915227	0.309785	4.2884	0.157686	0.132158	0.675812	0.521723	0.141108	-1.05786	3.11961	0.20623	0.0438839	-1.42744	1.18425	1.59243	0.184573	0.342251	-0.15559	-0.101145	0.871518	0.367083	1.04263	1.32672	-1.01759	0.191234	0.935117	0.0844493	-0.115009	-7.10337
ENSG00000165757	-0.823854	-2.21822	-2.23075	-2.25979	-0.267554	-0.228202	1.64003	1.2243	0.0886163	0.295857	0.253525	-2.11923	0.229267	-4.63972	-0.0924897	0.424539	-0.242703	-2.20544	0.968862	-1.53889	0.990023	0.907145	0.300955	0.21302	-0.0708797	0.356735	0.369245	0.778837	0.602098	1.62204	0.383813	-0.245289	2.90155
ENSG00000155897	0.486266	0.245372	0.319301	-1.72192	0.219598	1.29135	3.87553	0.0374252	3.76487	0.646566	-0.735787	1.60558	1.63658	-1.36918	1.49872	-0.117878	0.127702	4.46381	0.0440297	-1.26137	-0.543279	2.05131	1.9122	1.32313	1.73421	-0.366642	-0.288273	0.542975	3.81199	1.00592	2.97526	1.3408	-1.03633
ENSG00000139988	-1.41888	-0.545744	0.373979	-2.066	-1.0416	1.04623	-0.45414	0.201799	0.158472	0.706858	-0.28582	0.141099	-0.113084	-1.21035	-4.87056	1.41242	-0.68257	0.390884	0.81565	-1.75333	-0.779556	-1.00346	0.353343	-0.785175	-0.379926	0.833587	0.888445	-0.289909	0.228076	-2.57063	1.84861	-0.886265	-4.95042
ENSG00000107951	-4.33685	-1.62187	0.387733	-0.210802	-0.268685	-0.40959	2.47141	2.63096	-0.286742	-0.631056	-0.481855	-0.0745068	-2.18123	0.505822	0.236235	-0.551842	0.721848	-1.49649	1.9017	0.186374	-0.636663	-0.146672	0.282186	-0.657565	-0.276024	-0.299583	-0.558499	2.95763	0.33128	0.492884	0.572961	-0.226412	-0.0288912
ENSG00000168297	0.422803	1.36772	2.35106	0.554212	0.619115	5.24124	2.86081	0.559087	-0.450436	4.2511	3.4315	1.77688	2.34308	0.244364	0.0490572	1.66707	0.598566	1.21149	0.847076	0.126277	-1.38604	-1.10273	-1.37307	0.172994	0.371597	2.11122	0.916373	3.57273	-1.1776	1.28693	-0.290441	0.139471	0.491776
ENSG00000086289	3.05877	1.54727	0.525823	1.27067	1.18373	1.34105	2.32471	-0.326719	0.764906	1.4288	3.54758	0.701177	1.385	2.44325	1.68689	0.941106	-0.783643	2.13677	0.191811	2.81016	-0.00650942	1.60646	-2.80644	0.695336	-0.0242305	0.851645	1.33366	3.31049	0.14766	-0.376653	0.768998	1.75922	-1.36507
ENSG00000112782	1.13917	0.360987	-0.49728	-0.370031	-0.722921	2.11617	-0.0570263	0.404092	2.05012	0.363919	0.600432	-0.45006	0.144971	0.937421	-0.429205	-0.706701	-0.727538	0.284588	-0.485994	2.4324	0.056317	-0.0634316	-0.568982	2.60364	1.01797	2.58581	0.345742	-0.00282256	-0.075127	0.379231	-1.29171	0.103718	-0.0543544
ENSG00000132164	0.330964	1.70802	1.40504	2.84921	-1.87834	-2.18754	0.764791	-3.8065	0.621001	0.187629	-1.70355	-1.40673	2.44622	-5.81266	1.78986	0.168518	4.86216	1.29368	-0.280912	-4.02953	-1.55341	2.42762	0.457909	0.567747	2.28864	-0.526792	1.90197	2.0697	0.998755	-2.26684	-1.42808	-0.237866	-2.75687
ENSG00000106483	-1.1057	-0.725821	-2.23816	0.474511	-0.309838	-0.536748	2.48341	-0.360544	0.461456	0.0509994	0.805613	0.408358	-0.318729	-1.80097	-1.72616	1.49911	0.176754	0.45792	-0.556003	0.271461	0.449755	3.90616	0.988068	1.23476	-0.403309	-0.927767	-0.705444	1.94847	-1.46717	-0.998955	-0.796865	0.00245971	-0.880851
ENSG00000175414	-1.63134	-2.31973	-2.52534	-0.514667	0.0229975	1.32464	1.70154	0.680582	1.72582	1.76347	1.27974	2.06971	0.543673	5.914	-4.14151	0.671633	-1.75185	-0.692151	2.69826	-0.405407	3.22255	-0.285197	-1.72842	-1.13031	-0.731947	-1.8836	-1.98952	-0.362938	-2.25461	0.144853	-0.16774	-0.765165	-1.09692
ENSG00000188133	0.104308	-0.71595	0.5809	1.47539	-0.768818	-1.63108	-0.137846	0.168434	0.739514	-0.0264651	0.133451	0.399792	-0.399815	-0.548361	1.67876	-0.201172	-1.66659	0.767879	0.448204	-0.788489	0.309301	-1.0575	0.579448	-0.813458	0.600137	-0.72715	-0.0217109	0.864611	0.906808	2.87979	1.08118	-0.095474	-0.589433
ENSG00000144824	-1.73045	-0.00763553	1.00144	2.76534	-2.21711	-0.179187	0.773239	-5.38024	0.696191	0.52262	1.68486	1.09134	1.5034	0.111229	0.706268	1.86708	2.66034	-3.18833	1.26624	-1.36104	-1.76521	1.55328	-0.735393	-2.6453	-2.24466	-0.160653	1.09749	-5.13883	-2.46346	-1.5896	-0.432983	-0.473281	-1.50318
ENSG00000114805	-0.640604	2.82896	0.0962789	-4.38834	-4.05749	0.727045	1.46798	-3.04836	0.639901	3.13695	-1.11245	-0.0138164	-3.54179	-1.32281	-0.410559	1.22974	-0.132021	-1.98284	0.832836	3.98571	-1.01534	-3.14077	-0.165478	-2.7774	-4.199	0.817118	-1.46692	1.73144	-0.978811	-1.09114	2.34677	2.48702	3.03085
ENSG00000214530	-1.35078	0.831872	-0.874713	-0.738045	-1.41844	3.27386	0.0943387	0.683877	0.797138	0.255143	0.422923	-0.160793	2.39069	-0.155265	0.0814893	0.092079	2.47272	-0.808568	2.12335	0.627826	-0.314718	1.79362	-3.72736	1.49881	0.842302	0.146455	-2.05738	3.50254	0.217499	2.67476	-0.91335	0.0273953	0.928568
ENSG00000087494	-1.37992	2.35619	4.02486	3.21763	-0.928816	-2.03044	-5.31471	0.941429	2.65581	0.0883482	1.51774	0.266984	0.966197	2.88551	2.8257	1.51882	3.45131	2.88437	2.025	1.11994	3.5672	1.63192	-3.40491	-0.74083	0.719845	0.1371	-0.509504	1.2738	-1.19055	1.60831	0.33552	0.102022	-1.9469
ENSG00000175356	0.690761	-4.6831	1.03271	4.93289	-1.59437	0.389237	-1.43385	2.30555	-0.274438	-2.72169	-0.535589	-1.76509	0.559111	0.873367	-1.97574	-0.962296	0.782205	2.3266	0.341157	0.270347	-0.983714	0.116075	-3.16012	-2.50642	-0.103678	1.20204	-2.52655	-0.527663	-3.45569	-0.0496612	-0.203162	-1.31899	3.87785
ENSG00000125246	-0.900816	-3.01619	1.08426	0.139325	1.44914	-1.10363	-0.184116	-1.17134	-0.555306	-0.424112	0.817291	-0.299176	-1.95558	-0.258479	-2.08771	-1.13079	-0.863523	-0.893508	-1.76898	0.535131	1.59492	1.84136	-0.600978	0.343473	-0.0941443	0.558741	2.43011	0.139053	-3.50751	-1.03804	0.15072	-0.64808	-1.41497
ENSG00000143537	-1.7646	1.46719	3.85072	-3.61098	-2.61252	0.787817	1.94526	-1.49239	0.37495	1.7295	1.24447	1.62558	2.44561	1.55243	-3.00387	-0.503618	2.18653	1.05476	0.13119	0.237675	2.67193	-0.784831	2.3625	0.542875	0.818825	1.12251	-3.78741	1.4464	-1.24977	0.52836	-0.0172074	1.01997	0.821225
ENSG00000166562	-0.409994	-0.734477	-0.457885	-0.130499	-0.576667	1.64134	0.26953	1.63375	0.27123	-1.88624	-0.201444	-2.46784	-1.436	-0.69061	-0.0387148	-0.000504914	0.551796	0.197528	2.07497	0.257728	-0.189753	0.760518	-0.246241	0.353151	-0.123781	-0.984754	-1.35913	0.685484	-1.74853	1.43313	2.03034	0.744782	-2.39397
ENSG00000161896	-1.08053	0.137892	0.950613	0.328313	0.662091	0.879641	2.42518	1.08382	3.44347	3.09906	-0.874891	-0.422147	0.650049	0.376043	0.266977	1.69277	2.15951	0.243081	0.774421	2.30377	2.97559	1.27881	1.22835	-0.143994	-0.363305	0.490294	0.924369	1.49342	-0.748629	0.76729	-1.5826	-0.947741	-1.97746
ENSG00000059769	5.59366	-0.141188	-0.14175	-1.4056	0.384324	-0.166804	3.62423	-2.07013	-0.0104457	0.367095	-0.52045	-1.63543	0.250934	-1.59311	-0.0525654	-1.84363	-1.20211	0.42094	-0.404918	-0.399041	-0.346807	0.10189	0.458834	-3.14496	-3.24818	6.82733	-3.227	-2.23941	0.790712	0.402254	1.34357	4.1369	0.270807
ENSG00000169621	-1.0532	-0.240215	-1.90114	-0.955512	2.36901	0.352182	-1.66438	2.15635	-1.27171	1.26736	-1.08816	-0.41848	-0.713231	3.53051	-5.94332	0.414387	0.287615	-0.379446	1.05603	-3.2894	0.283564	-1.31986	2.21905	-0.197663	-1.15764	-0.314286	-3.38124	2.61193	-0.646967	0.157144	-0.159425	-0.477848	0.1439
ENSG00000243910	-0.680515	-0.641412	-1.80033	-0.730165	-0.0177342	-0.60523	2.65814	-0.195515	-2.04711	-2.10984	-0.385617	-2.66078	-3.34781	2.51247	-0.362879	-0.9111	-0.241221	-0.711655	-0.788776	-1.12982	-0.308994	-0.0104557	1.16627	0.840581	-0.00895676	-0.714479	-0.718144	-1.45738	0.303708	2.08807	0.391014	-0.784996	-1.5151
ENSG00000117682	1.25777	-0.349012	-1.49078	0.207942	0.885469	-0.370879	1.59108	0.669196	-2.34566	2.9884	-2.21952	0.191923	-0.867195	-0.0314926	-1.39717	0.240969	-0.990119	-0.668364	-0.949222	-0.588224	1.63015	-0.370026	-1.53086	-0.614536	-0.0505413	-0.985133	-0.789171	-0.373815	0.0112934	2.27929	-3.40233	-2.05965	1.83124
ENSG00000144366	4.13681	-0.077715	-0.445328	0.420074	2.13404	-3.81169	0.476528	-0.162527	-0.282813	1.81039	-0.0989304	-0.56319	1.24509	1.98144	-0.269032	3.47438	0.730329	1.46409	-0.375187	-0.884716	-0.536796	-0.614897	5.50854	1.51123	0.580444	-0.148241	-0.521347	1.5397	2.47041	2.23816	0.63335	2.08113	4.94613
ENSG00000115661	-3.05222	-2.83844	0.267398	1.59329	1.58246	-0.672645	1.54786	2.08262	0.971509	0.315971	0.871617	0.608845	1.87635	0.92733	1.24695	-0.729382	0.208398	0.23245	-0.00805808	0.300562	1.78397	-0.317422	0.325653	0.303441	-0.799576	-1.30983	-0.974068	1.85056	1.77572	1.48339	-2.83236	-0.452724	-2.10598
ENSG00000137841	-0.555445	-0.200673	2.11318	0.947066	0.876695	1.20742	2.16064	-1.29429	2.65963	-0.366913	-0.444412	-1.49173	2.22143	0.0219497	-0.766873	0.788963	2.98795	-0.545227	0.78166	-0.142681	0.233797	1.33998	0.859119	1.33862	2.83966	0.812325	0.87804	-0.171708	0.844485	0.451434	0.837941	0.0981287	-1.59249
ENSG00000175874	3.11019	2.42583	3.43683	1.54196	1.21721	5.10297	4.80824	3.93679	3.66191	1.15046	1.31793	0.586186	0.474608	3.37782	1.47929	0.939815	6.04482	1.73335	3.82668	0.467198	-0.0109393	0.789286	1.59091	1.06171	-2.53893	1.31539	1.79511	0.393587	0.661701	0.344064	0.911069	0.517569	0.45505
ENSG00000043355	-0.0693607	-0.21101	-3.50211	-0.640417	-1.33286	-0.359935	4.43651	0.586247	-2.41134	0.0382865	-1.60304	0.133296	-0.298394	-2.39097	0.908155	-0.437041	-3.0808	-1.47395	-1.8205	-1.74319	0.698931	0.901801	2.43142	-1.68962	-0.282591	-0.810786	0.388976	4.64922	1.80653	-0.404356	0.335269	-1.52209	-5.30914
ENSG00000183023	2.14664	2.62978	2.71199	1.25638	0.348542	3.30981	0.815499	1.24214	0.617583	0.503652	2.54183	2.23374	0.85908	-1.95203	0.247919	-0.471931	0.105462	0.998757	-1.61596	0.0127062	2.99678	1.44275	1.40569	3.17452	1.55499	2.09879	-4.27215	6.78884	-2.56299	-2.32278	-2.35513	0.753312	0.578774
[truncated: 1,533 more rows]

## Sheet: bonobo
	1 Supramarginal (BA40)	2 2ary Auditory (BA22)	3 Precuneus (BA7)	4 Cingulate Posterior (BA31)	5 Premotor (BA6)	6 1ary Somatosensory (BA3/1/2)	7 1ary Auditory (BA41/42)	8 1ary Motor (BA4)	9 1ary Visual (BA17)	10 2ary Visual (BA18/19)	11 Cingulate Anterior (BA24)	12 Cingulate Anterior (BA32)	13 Prefrontal (BA10)	14 Inferior Temporal (BA20)	15 Insular Posterior Cortex	16 Dorsolateral Prefrontal (BA9)	17 Orbitofrontal (BA11)	18 Ventrolateral Prefrontal (BA44)	19 Amygdala	20 Entorhinal Cortex	21 Hippocampus	22 Hypothalamus	23 Thalamus	24 Corpus Callosum Anterior	25 Corpus Callosum Posterior	26 Internal Capsule	27 Globus Pallidus	28 Cerebellar White Matter	29 Substantia Nigra	30 Cerebellar Grey Matter	31 Putamen	32 Caudate	33 Nucleus Accumbens
[truncated: 2,801 more rows]
