# Supplementary material for: Single-cell-resolution transcriptome map of human, chimpanzee, bonobo, and macaque brains
Source: HighWire-hosted journal article supplement (doi:10.1101/gr.256958.119), 2020-05-01
Supplement: Supplemental_Table_S3.xlsx [file Supplemental_Table_S3.xlsx]

## Sheet: Sheet1
Table S3. Genes showing human-specificity in multiple (more than 10 of 33) brain regions.
Gene ID	Number of brain regions in which this gene shows human-specific expression (the average of human-chimpanzee and human-bonobo comparisons)
ENSG00000070729	26.5
ENSG00000091592	24
ENSG00000244588	23
ENSG00000124251	23
ENSG00000144369	22.5
ENSG00000080031	22.5
ENSG00000140873	22
ENSG00000175874	21.5
ENSG00000251349	21.5
ENSG00000187775	21.5
ENSG00000095932	21
ENSG00000197977	20.5
ENSG00000145708	20.5
ENSG00000135437	20
ENSG00000122691	20
ENSG00000166847	19.5
ENSG00000100083	19
ENSG00000101349	19
ENSG00000139973	19
ENSG00000139767	18.5
ENSG00000204396	18.5
ENSG00000100239	18.5
ENSG00000103091	18.5
ENSG00000166105	18.5
ENSG00000110628	18
ENSG00000273079	18
ENSG00000137872	18
ENSG00000149311	18
ENSG00000133466	17.5
ENSG00000127324	17.5
ENSG00000067715	17.5
ENSG00000007174	17.5
ENSG00000158623	17.5
ENSG00000185615	17.5
ENSG00000133256	17.5
ENSG00000198563	17.5
ENSG00000146453	17.5
ENSG00000116852	17.5
ENSG00000059691	17.5
ENSG00000064300	17.5
ENSG00000115738	17
ENSG00000119125	17
ENSG00000137070	17
ENSG00000164023	17
ENSG00000043462	17
ENSG00000182698	17
ENSG00000249437	17
ENSG00000125337	17
ENSG00000115041	17
ENSG00000260092	17
ENSG00000132155	17
ENSG00000107147	17
ENSG00000143171	16.5
ENSG00000272636	16.5
ENSG00000180921	16.5
ENSG00000156928	16.5
ENSG00000163032	16.5
ENSG00000179915	16.5
ENSG00000169592	16.5
ENSG00000138670	16.5
ENSG00000135454	16.5
ENSG00000198901	16.5
ENSG00000183023	16.5
ENSG00000104361	16.5
ENSG00000162441	16.5
ENSG00000170786	16.5
ENSG00000107954	16.5
ENSG00000123064	16.5
ENSG00000101255	16.5
ENSG00000167281	16.5
ENSG00000114204	16
ENSG00000131378	16
ENSG00000163075	16
ENSG00000168386	16
ENSG00000182836	16
ENSG00000101463	16
ENSG00000172020	16
ENSG00000021355	16
ENSG00000143340	16
ENSG00000167261	16
ENSG00000136161	16
ENSG00000165716	16
ENSG00000078098	16
ENSG00000157782	16
ENSG00000112983	16
ENSG00000162444	16
ENSG00000094796	16
ENSG00000143420	15.5
ENSG00000185015	15.5
ENSG00000159200	15.5
ENSG00000166819	15.5
ENSG00000134020	15.5
ENSG00000115307	15.5
ENSG00000112149	15.5
ENSG00000090863	15.5
ENSG00000074317	15.5
ENSG00000186487	15.5
ENSG00000213213	15.5
ENSG00000068724	15.5
ENSG00000063438	15.5
ENSG00000111790	15.5
ENSG00000168959	15.5
ENSG00000131459	15.5
ENSG00000084090	15.5
ENSG00000143321	15.5
ENSG00000132912	15.5
ENSG00000141556	15.5
ENSG00000073350	15.5
ENSG00000162852	15.5
ENSG00000183775	15.5
ENSG00000146670	15
ENSG00000173208	15
ENSG00000225697	15
ENSG00000111269	15
ENSG00000111203	15
ENSG00000260001	15
ENSG00000162384	15
ENSG00000159899	15
ENSG00000169064	15
ENSG00000127481	15
ENSG00000120925	15
ENSG00000117748	15
ENSG00000135636	15
ENSG00000144040	15
ENSG00000060558	15
ENSG00000139220	15
ENSG00000251322	15
ENSG00000151468	15
ENSG00000180537	15
ENSG00000067369	15
ENSG00000089053	15
ENSG00000185565	15
ENSG00000120254	15
ENSG00000135074	15
ENSG00000186891	15
ENSG00000148187	15
ENSG00000116254	15
ENSG00000181392	15
ENSG00000085733	15
ENSG00000169660	15
ENSG00000125450	15
ENSG00000170345	15
ENSG00000189056	15
ENSG00000188878	15
ENSG00000104888	15
ENSG00000168502	14.5
ENSG00000158467	14.5
ENSG00000150625	14.5
ENSG00000138606	14.5
ENSG00000152910	14.5
ENSG00000187634	14.5
ENSG00000120549	14.5
ENSG00000013583	14.5
ENSG00000162714	14.5
ENSG00000004399	14.5
ENSG00000177511	14.5
ENSG00000006712	14.5
ENSG00000123358	14.5
ENSG00000086289	14.5
ENSG00000143537	14.5
ENSG00000137198	14.5
ENSG00000120645	14.5
ENSG00000112200	14.5
ENSG00000133067	14.5
ENSG00000166558	14.5
ENSG00000138594	14.5
ENSG00000165752	14.5
ENSG00000174951	14.5
ENSG00000151892	14.5
ENSG00000160294	14.5
ENSG00000162736	14.5
ENSG00000088854	14
ENSG00000115970	14
ENSG00000152527	14
ENSG00000127483	14
ENSG00000178602	14
ENSG00000041353	14
ENSG00000143398	14
ENSG00000165730	14
ENSG00000172987	14
ENSG00000143578	14
ENSG00000187135	14
ENSG00000171703	14
ENSG00000142669	14
ENSG00000242173	14
ENSG00000136250	14
ENSG00000155897	14
ENSG00000204653	14
ENSG00000130540	14
ENSG00000160305	14
ENSG00000135439	14
ENSG00000154027	14
ENSG00000160226	14
ENSG00000182263	14
ENSG00000143847	14
ENSG00000172346	14
ENSG00000130811	14
ENSG00000146090	14
ENSG00000132780	14
ENSG00000175445	14
ENSG00000146386	14
ENSG00000148798	14
ENSG00000106078	14
ENSG00000133243	14
ENSG00000110723	14
ENSG00000163624	14
ENSG00000145863	14
ENSG00000167861	14
ENSG00000196074	14
ENSG00000132024	14
ENSG00000146250	14
ENSG00000075223	13.5
ENSG00000169427	13.5
ENSG00000116544	13.5
ENSG00000166794	13.5
ENSG00000010282	13.5
ENSG00000019991	13.5
ENSG00000251503	13.5
ENSG00000272325	13.5
ENSG00000221955	13.5
ENSG00000221968	13.5
ENSG00000125966	13.5
ENSG00000124507	13.5
ENSG00000070610	13.5
ENSG00000134215	13.5
ENSG00000170581	13.5
ENSG00000100350	13.5
ENSG00000119787	13.5
ENSG00000019505	13.5
ENSG00000187730	13.5
ENSG00000183049	13.5
ENSG00000115457	13.5
ENSG00000171243	13.5
ENSG00000122417	13.5
ENSG00000132932	13.5
ENSG00000092529	13.5
ENSG00000118946	13.5
ENSG00000144366	13.5
ENSG00000130222	13.5
ENSG00000141959	13.5
ENSG00000162881	13.5
ENSG00000087365	13.5
ENSG00000121742	13.5
ENSG00000140955	13.5
ENSG00000141294	13.5
ENSG00000147408	13.5
ENSG00000152270	13.5
ENSG00000153012	13.5
ENSG00000054282	13.5
ENSG00000099889	13.5
ENSG00000183092	13.5
ENSG00000140678	13.5
ENSG00000139636	13.5
ENSG00000156218	13.5
ENSG00000161509	13.5
ENSG00000172782	13.5
ENSG00000022355	13.5
ENSG00000116353	13.5
ENSG00000164506	13.5
ENSG00000053108	13.5
ENSG00000167553	13
ENSG00000166979	13
ENSG00000122986	13
ENSG00000159753	13
ENSG00000182175	13
ENSG00000130414	13
ENSG00000104059	13
ENSG00000116670	13
ENSG00000171223	13
ENSG00000186479	13
ENSG00000130477	13
ENSG00000168906	13
ENSG00000171208	13
ENSG00000139168	13
ENSG00000135502	13
ENSG00000149926	13
ENSG00000105409	13
ENSG00000074527	13
ENSG00000124181	13
ENSG00000101098	13
ENSG00000015133	13
ENSG00000146221	13
ENSG00000087494	13
ENSG00000196159	13
ENSG00000165084	13
ENSG00000177675	13
ENSG00000198929	13
ENSG00000040731	13
ENSG00000077522	13
ENSG00000149582	13
ENSG00000138449	13
ENSG00000109944	13
ENSG00000028116	13
ENSG00000136531	13
ENSG00000002822	13
ENSG00000128833	13
ENSG00000141449	13
ENSG00000178522	13
ENSG00000100445	13
ENSG00000164326	13
ENSG00000127418	13
ENSG00000187147	13
ENSG00000198718	13
ENSG00000161381	13
ENSG00000139117	13
ENSG00000137656	13
ENSG00000160285	13
ENSG00000101134	13
ENSG00000188611	13
ENSG00000123610	13
ENSG00000107130	13
ENSG00000118733	12.5
ENSG00000165487	12.5
ENSG00000183688	12.5
ENSG00000206530	12.5
ENSG00000138434	12.5
ENSG00000152556	12.5
ENSG00000146263	12.5
ENSG00000144619	12.5
ENSG00000068078	12.5
ENSG00000213578	12.5
ENSG00000148429	12.5
ENSG00000174004	12.5
ENSG00000159228	12.5
ENSG00000143256	12.5
ENSG00000107295	12.5
ENSG00000170745	12.5
ENSG00000182054	12.5
ENSG00000164100	12.5
ENSG00000166946	12.5
ENSG00000154447	12.5
ENSG00000107105	12.5
ENSG00000021762	12.5
ENSG00000166862	12.5
ENSG00000132639	12.5
ENSG00000100714	12.5
ENSG00000179796	12.5
ENSG00000072422	12.5
ENSG00000100362	12.5
ENSG00000197858	12.5
ENSG00000171798	12.5
ENSG00000162878	12.5
ENSG00000079459	12.5
ENSG00000110148	12.5
ENSG00000152503	12.5
ENSG00000185274	12.5
ENSG00000162520	12.5
ENSG00000100626	12.5
ENSG00000157613	12.5
ENSG00000145920	12.5
ENSG00000104549	12.5
ENSG00000105486	12.5
ENSG00000151572	12.5
ENSG00000095539	12.5
ENSG00000136891	12.5
ENSG00000100883	12.5
ENSG00000154175	12.5
ENSG00000161558	12.5
ENSG00000163126	12.5
ENSG00000205129	12.5
ENSG00000182256	12.5
ENSG00000206053	12.5
ENSG00000102924	12.5
ENSG00000070886	12.5
ENSG00000011083	12.5
ENSG00000119685	12.5
ENSG00000148399	12.5
ENSG00000152495	12.5
ENSG00000165124	12.5
ENSG00000184254	12.5
ENSG00000176387	12.5
ENSG00000100320	12
ENSG00000166501	12
ENSG00000065802	12
ENSG00000109881	12
ENSG00000135406	12
ENSG00000166407	12
ENSG00000111261	12
ENSG00000051128	12
ENSG00000181240	12
ENSG00000183751	12
ENSG00000099904	12
ENSG00000095066	12
ENSG00000142606	12
ENSG00000124225	12
ENSG00000165821	12
ENSG00000104722	12
ENSG00000277586	12
ENSG00000116819	12
ENSG00000171824	12
ENSG00000185272	12
ENSG00000184220	12
ENSG00000078618	12
ENSG00000141424	12
ENSG00000101489	12
ENSG00000181215	12
ENSG00000176422	12
ENSG00000160808	12
ENSG00000105397	12
ENSG00000180096	12
ENSG00000138801	12
ENSG00000068383	12
ENSG00000168297	12
ENSG00000181350	12
ENSG00000188931	12
ENSG00000141738	12
ENSG00000132561	12
ENSG00000124126	12
ENSG00000051009	12
ENSG00000118160	12
ENSG00000102931	12
ENSG00000108375	12
ENSG00000153790	12
ENSG00000168993	12
ENSG00000147647	12
ENSG00000102900	12
ENSG00000151474	12
ENSG00000119906	12
ENSG00000131941	12
ENSG00000182870	12
ENSG00000151640	12
ENSG00000198171	12
ENSG00000186281	12
ENSG00000123349	12
ENSG00000172817	12
ENSG00000105976	12
ENSG00000165660	12
ENSG00000183828	12
ENSG00000169738	12
ENSG00000129244	12
ENSG00000120008	12
ENSG00000007520	12
ENSG00000102763	12
ENSG00000110002	12
ENSG00000136114	12
ENSG00000176248	12
ENSG00000168434	12
ENSG00000159023	12
ENSG00000120725	12
ENSG00000182575	12
ENSG00000198168	12
ENSG00000177556	12
ENSG00000167536	12
ENSG00000101282	12
ENSG00000145494	12
ENSG00000165672	12
ENSG00000235718	12
ENSG00000179335	12
ENSG00000146005	12
ENSG00000205221	11.5
ENSG00000164627	11.5
ENSG00000109270	11.5
ENSG00000153132	11.5
ENSG00000138363	11.5
ENSG00000156983	11.5
ENSG00000148600	11.5
ENSG00000091622	11.5
ENSG00000104435	11.5
ENSG00000122591	11.5
ENSG00000234444	11.5
ENSG00000181031	11.5
ENSG00000170310	11.5
ENSG00000250510	11.5
ENSG00000134013	11.5
ENSG00000213672	11.5
ENSG00000137936	11.5
ENSG00000103460	11.5
ENSG00000107736	11.5
ENSG00000053702	11.5
ENSG00000023909	11.5
ENSG00000147454	11.5
ENSG00000064687	11.5
ENSG00000091536	11.5
ENSG00000224982	11.5
ENSG00000149929	11.5
ENSG00000069431	11.5
ENSG00000135541	11.5
ENSG00000081803	11.5
ENSG00000107864	11.5
ENSG00000133107	11.5
ENSG00000101442	11.5
ENSG00000133805	11.5
ENSG00000152795	11.5
ENSG00000111452	11.5
ENSG00000141456	11.5
ENSG00000187595	11.5
ENSG00000182768	11.5
ENSG00000149231	11.5
ENSG00000141837	11.5
ENSG00000188811	11.5
ENSG00000178718	11.5
ENSG00000204767	11.5
ENSG00000175352	11.5
ENSG00000186439	11.5
ENSG00000162772	11.5
ENSG00000109576	11.5
ENSG00000101680	11.5
ENSG00000140323	11.5
ENSG00000142530	11.5
ENSG00000196235	11.5
ENSG00000140545	11.5
ENSG00000082515	11.5
ENSG00000144029	11.5
ENSG00000118729	11.5
ENSG00000169020	11.5
ENSG00000070882	11.5
ENSG00000145335	11.5
ENSG00000172831	11.5
ENSG00000075826	11.5
ENSG00000167619	11.5
ENSG00000169918	11.5
ENSG00000121410	11.5
ENSG00000171772	11.5
ENSG00000131018	11.5
ENSG00000144596	11.5
ENSG00000160310	11.5
ENSG00000128591	11.5
ENSG00000084628	11.5
ENSG00000130948	11.5
ENSG00000171219	11.5
ENSG00000072818	11.5
ENSG00000130876	11.5
ENSG00000145050	11.5
ENSG00000102738	11.5
ENSG00000166546	11.5
ENSG00000073756	11.5
ENSG00000092020	11.5
ENSG00000145287	11.5
ENSG00000139971	11.5
ENSG00000178096	11.5
ENSG00000128805	11.5
ENSG00000178860	11.5
ENSG00000154553	11.5
ENSG00000262655	11.5
ENSG00000108179	11.5
ENSG00000182809	11.5
ENSG00000166479	11.5
ENSG00000169964	11.5
ENSG00000103253	11.5
ENSG00000103245	11.5
ENSG00000154265	11.5
ENSG00000070388	11.5
ENSG00000176884	11.5
ENSG00000105771	11.5
ENSG00000066923	11.5
ENSG00000150977	11.5
ENSG00000086570	11.5
ENSG00000076924	11.5
ENSG00000204316	11.5
ENSG00000147642	11.5
ENSG00000058668	11.5
ENSG00000099860	11
ENSG00000185658	11
ENSG00000184363	11
ENSG00000166598	11
ENSG00000125870	11
ENSG00000168952	11
ENSG00000119147	11
ENSG00000198039	11
ENSG00000165125	11
ENSG00000092850	11
ENSG00000106066	11
ENSG00000170381	11
ENSG00000156170	11
ENSG00000163170	11
ENSG00000088179	11
ENSG00000185522	11
ENSG00000156076	11
ENSG00000109320	11
ENSG00000101327	11
ENSG00000184307	11
ENSG00000168016	11
ENSG00000171517	11
ENSG00000101040	11
ENSG00000134070	11
ENSG00000140553	11
ENSG00000166454	11
ENSG00000103121	11
ENSG00000198646	11
ENSG00000122042	11
ENSG00000162636	11
ENSG00000100353	11
ENSG00000147872	11
ENSG00000198797	11
ENSG00000162639	11
ENSG00000166839	11
ENSG00000178726	11
ENSG00000074935	11
ENSG00000197557	11
ENSG00000069869	11
ENSG00000161091	11
ENSG00000047579	11
ENSG00000105737	11
ENSG00000047346	11
ENSG00000114021	11
ENSG00000113621	11
ENSG00000175581	11
ENSG00000152977	11
ENSG00000154162	11
ENSG00000215305	11
ENSG00000244187	11
ENSG00000095383	11
ENSG00000006607	11
ENSG00000117069	11
ENSG00000057608	11
ENSG00000113739	11
ENSG00000116786	11
ENSG00000105058	11
ENSG00000170854	11
ENSG00000164039	11
ENSG00000167670	11
ENSG00000066651	11
ENSG00000106803	11
ENSG00000105954	11
ENSG00000110427	11
ENSG00000145194	11
ENSG00000237172	11
ENSG00000151623	11
ENSG00000102878	11
ENSG00000148308	11
ENSG00000115137	11
ENSG00000184428	11
ENSG00000162377	11
ENSG00000161055	11
ENSG00000005020	11
ENSG00000132323	11
ENSG00000128039	11
ENSG00000168758	11
ENSG00000172270	11
ENSG00000132386	11
ENSG00000100346	11
ENSG00000172985	11
ENSG00000212916	11
ENSG00000174576	11
ENSG00000168280	11
ENSG00000170954	11
ENSG00000104983	11
ENSG00000173846	11
ENSG00000131773	11
ENSG00000091664	11
ENSG00000112276	11
ENSG00000182557	11
ENSG00000120049	11
ENSG00000133665	11
ENSG00000091428	11
ENSG00000260230	11
ENSG00000149485	11
ENSG00000196189	11
ENSG00000167900	11
ENSG00000173227	11
ENSG00000144278	10.5
ENSG00000071073	10.5
ENSG00000167216	10.5
ENSG00000213199	10.5
ENSG00000124493	10.5
ENSG00000179242	10.5
ENSG00000151789	10.5
ENSG00000005175	10.5
ENSG00000122873	10.5
ENSG00000129159	10.5
ENSG00000130313	10.5
ENSG00000176165	10.5
ENSG00000131149	10.5
ENSG00000106605	10.5
ENSG00000111412	10.5
ENSG00000166444	10.5
ENSG00000100416	10.5
ENSG00000171724	10.5
ENSG00000174989	10.5
ENSG00000177595	10.5
ENSG00000134775	10.5
ENSG00000105784	10.5
ENSG00000185133	10.5
ENSG00000108474	10.5
ENSG00000112514	10.5
ENSG00000156253	10.5
ENSG00000144283	10.5
ENSG00000152669	10.5
ENSG00000115718	10.5
ENSG00000164114	10.5
ENSG00000128610	10.5
ENSG00000164099	10.5
ENSG00000163873	10.5
ENSG00000003393	10.5
ENSG00000154764	10.5
ENSG00000142867	10.5
ENSG00000154358	10.5
ENSG00000178965	10.5
ENSG00000152583	10.5
ENSG00000126391	10.5
ENSG00000118407	10.5
ENSG00000087008	10.5
ENSG00000140937	10.5
ENSG00000136830	10.5
ENSG00000100167	10.5
ENSG00000157933	10.5
ENSG00000108960	10.5
ENSG00000103316	10.5
ENSG00000187122	10.5
ENSG00000087263	10.5
ENSG00000214530	10.5
ENSG00000161896	10.5
ENSG00000162415	10.5
ENSG00000196284	10.5
ENSG00000163655	10.5
ENSG00000168066	10.5
ENSG00000206535	10.5
ENSG00000183287	10.5
ENSG00000178297	10.5
ENSG00000174963	10.5
ENSG00000145075	10.5
ENSG00000204991	10.5
ENSG00000135299	10.5
ENSG00000136444	10.5
ENSG00000163563	10.5
ENSG00000167508	10.5
ENSG00000109472	10.5
ENSG00000072210	10.5
ENSG00000225968	10.5
ENSG00000011028	10.5
ENSG00000152932	10.5
ENSG00000176749	10.5
ENSG00000171853	10.5
ENSG00000137171	10.5
ENSG00000178038	10.5
ENSG00000164199	10.5
ENSG00000139537	10.5
ENSG00000110719	10.5
ENSG00000108799	10.5
ENSG00000166352	10.5
ENSG00000099365	10.5
ENSG00000151929	10.5
ENSG00000103496	10.5
ENSG00000100814	10.5
ENSG00000143314	10.5
ENSG00000041515	10.5
ENSG00000119408	10.5
ENSG00000099284	10.5
ENSG00000203805	10.5
ENSG00000156931	10.5
ENSG00000129991	10.5
ENSG00000152822	10.5
ENSG00000171097	10.5
ENSG00000053501	10.5
ENSG00000112319	10.5
ENSG00000186952	10.5
ENSG00000112280	10.5
ENSG00000140403	10.5
ENSG00000171532	10.5
ENSG00000162849	10.5
ENSG00000204427	10.5
ENSG00000227051	10.5
ENSG00000137501	10.5
ENSG00000111962	10.5
ENSG00000173894	10.5
ENSG00000107242	10.5
ENSG00000112812	10
ENSG00000196091	10
ENSG00000172059	10
ENSG00000115053	10
ENSG00000139190	10
ENSG00000135643	10
ENSG00000132004	10
ENSG00000027001	10
ENSG00000115306	10
ENSG00000174348	10
ENSG00000113387	10
ENSG00000184544	10
ENSG00000183248	10
ENSG00000196408	10
ENSG00000144647	10
ENSG00000166262	10
ENSG00000237765	10
ENSG00000128512	10
ENSG00000015475	10
ENSG00000143032	10
ENSG00000002745	10
ENSG00000178035	10
ENSG00000088992	10
ENSG00000099840	10
ENSG00000130164	10
ENSG00000178821	10
ENSG00000133246	10
ENSG00000156026	10
ENSG00000134759	10
ENSG00000157064	10
ENSG00000161082	10
ENSG00000136267	10
ENSG00000135622	10
ENSG00000112972	10
ENSG00000169224	10
ENSG00000121297	10
ENSG00000125388	10
ENSG00000144290	10
ENSG00000204248	10
ENSG00000185518	10
ENSG00000124608	10
ENSG00000188981	10
ENSG00000088448	10
ENSG00000248485	10
ENSG00000138152	10
ENSG00000104219	10
ENSG00000198739	10
ENSG00000134222	10
ENSG00000131697	10
ENSG00000162745	10
ENSG00000140400	10
ENSG00000122335	10
ENSG00000132635	10
ENSG00000168488	10
ENSG00000145782	10
ENSG00000087087	10
ENSG00000100401	10
ENSG00000101333	10
ENSG00000104112	10
ENSG00000109943	10
ENSG00000148218	10
ENSG00000176783	10
ENSG00000187266	10
ENSG00000125149	10
ENSG00000171055	10
ENSG00000176769	10
ENSG00000127527	10
ENSG00000149256	10
ENSG00000161010	10
ENSG00000090686	10
ENSG00000159111	10
ENSG00000170390	10
ENSG00000139428	10
ENSG00000104313	10
ENSG00000107902	10
ENSG00000163006	10
ENSG00000103175	10
ENSG00000161813	10
ENSG00000277791	10
ENSG00000064270	10
ENSG00000164649	10
ENSG00000175029	10
ENSG00000134851	10
ENSG00000104331	10
ENSG00000137494	10
ENSG00000205464	10
ENSG00000108984	10
ENSG00000182732	10
ENSG00000129910	10
ENSG00000141750	10
ENSG00000091490	10
ENSG00000164591	10
ENSG00000144115	10
ENSG00000154144	10
ENSG00000140395	10
ENSG00000172159	10
ENSG00000172590	10
ENSG00000165533	10
ENSG00000136110	10
ENSG00000198142	10
ENSG00000134817	10
ENSG00000172893	10
ENSG00000056558	10
ENSG00000148344	10
ENSG00000171246	10
ENSG00000148841	10
ENSG00000183576	10
ENSG00000074582	10
ENSG00000174567	10
ENSG00000100425	9.5
ENSG00000197265	9.5
ENSG00000187260	9.5
ENSG00000204220	9.5
ENSG00000125775	9.5
ENSG00000130475	9.5
ENSG00000183579	9.5
ENSG00000112367	9.5
ENSG00000204946	9.5
ENSG00000177181	9.5
ENSG00000145428	9.5
ENSG00000101182	9.5
ENSG00000183617	9.5
ENSG00000196812	9.5
ENSG00000116128	9.5
ENSG00000144136	9.5
ENSG00000025770	9.5
ENSG00000174938	9.5
ENSG00000155265	9.5
ENSG00000161960	9.5
ENSG00000124786	9.5
ENSG00000186184	9.5
ENSG00000166510	9.5
ENSG00000100345	9.5
ENSG00000145431	9.5
ENSG00000099785	9.5
ENSG00000125845	9.5
ENSG00000177000	9.5
ENSG00000168172	9.5
ENSG00000139178	9.5
ENSG00000133878	9.5
ENSG00000056972	9.5
ENSG00000074410	9.5
ENSG00000135245	9.5
ENSG00000250305	9.5
ENSG00000166949	9.5
ENSG00000178623	9.5
ENSG00000170396	9.5
ENSG00000275835	9.5
ENSG00000082996	9.5
ENSG00000166073	9.5
ENSG00000152952	9.5
ENSG00000158966	9.5
ENSG00000162913	9.5
ENSG00000168259	9.5
ENSG00000114279	9.5
ENSG00000196562	9.5
ENSG00000006740	9.5
ENSG00000070182	9.5
ENSG00000171503	9.5
ENSG00000139926	9.5
ENSG00000126088	9.5
ENSG00000070413	9.5
ENSG00000105251	9.5
ENSG00000074276	9.5
ENSG00000110711	9.5
ENSG00000167173	9.5
ENSG00000100122	9.5
ENSG00000155974	9.5
ENSG00000160298	9.5
ENSG00000078053	9.5
ENSG00000167264	9.5
ENSG00000167470	9.5
ENSG00000165185	9.5
ENSG00000196372	9.5
ENSG00000160593	9.5
ENSG00000188677	9.5
ENSG00000054148	9.5
ENSG00000188916	9.5
ENSG00000181754	9.5
ENSG00000185619	9.5
ENSG00000152208	9.5
ENSG00000119431	9.5
ENSG00000188322	9.5
ENSG00000156411	9.5
ENSG00000197702	9.5
ENSG00000135312	9.5
ENSG00000090539	9.5
ENSG00000261678	9.5
ENSG00000110237	9.5
ENSG00000198924	9.5
ENSG00000102910	9.5
ENSG00000100418	9.5
ENSG00000066583	9.5
ENSG00000171105	9.5
ENSG00000189319	9.5
ENSG00000138778	9.5
ENSG00000103319	9.5
ENSG00000115138	9.5
ENSG00000173614	9.5
ENSG00000146054	9.5
ENSG00000126562	9.5
ENSG00000117016	9.5
ENSG00000088836	9.5
ENSG00000115641	9.5
ENSG00000183111	9.5
ENSG00000118473	9.5
ENSG00000163630	9.5
ENSG00000110660	9.5
ENSG00000140743	9.5
ENSG00000008018	9.5
ENSG00000140694	9.5
ENSG00000179456	9.5
ENSG00000136098	9.5
ENSG00000068885	9.5
ENSG00000136942	9.5
ENSG00000162004	9.5
ENSG00000175110	9.5
ENSG00000159210	9.5
ENSG00000122484	9.5
ENSG00000172794	9.5
ENSG00000174695	9.5
ENSG00000148219	9.5
ENSG00000113296	9.5
ENSG00000163812	9.5
ENSG00000134569	9.5
ENSG00000134207	9.5
ENSG00000163378	9.5
ENSG00000122359	9.5
ENSG00000221932	9.5
ENSG00000197912	9.5
ENSG00000185046	9.5
ENSG00000188404	9.5
ENSG00000113318	9.5
ENSG00000088280	9.5
ENSG00000204950	9.5
ENSG00000163629	9.5
ENSG00000178773	9.5
ENSG00000100461	9.5
ENSG00000278318	9.5
ENSG00000153820	9.5
ENSG00000130347	9.5
ENSG00000105053	9.5
ENSG00000117650	9.5
ENSG00000198752	9.5
ENSG00000113141	9.5
ENSG00000173156	9.5
ENSG00000138101	9
ENSG00000116132	9
ENSG00000180488	9
ENSG00000170043	9
ENSG00000175707	9
ENSG00000102678	9
ENSG00000133101	9
ENSG00000092445	9
ENSG00000148604	9
ENSG00000137343	9
ENSG00000122965	9
ENSG00000153162	9
ENSG00000175920	9
ENSG00000112902	9
ENSG00000155158	9
ENSG00000012779	9
ENSG00000198838	9
ENSG00000179148	9
ENSG00000134072	9
ENSG00000111639	9
ENSG00000178171	9
ENSG00000111262	9
ENSG00000197279	9
ENSG00000115758	9
ENSG00000124749	9
ENSG00000075213	9
ENSG00000060237	9
ENSG00000124641	9
ENSG00000188921	9
ENSG00000106459	9
ENSG00000135845	9
ENSG00000135250	9
ENSG00000218336	9
ENSG00000253250	9
ENSG00000100285	9
ENSG00000040608	9
ENSG00000174939	9
ENSG00000139880	9
ENSG00000134152	9
ENSG00000133119	9
ENSG00000126432	9
ENSG00000244486	9
ENSG00000157856	9
ENSG00000106012	9
ENSG00000065054	9
ENSG00000167657	9
ENSG00000198276	9
ENSG00000254999	9
ENSG00000155980	9
ENSG00000136205	9
ENSG00000163902	9
ENSG00000171956	9
ENSG00000105137	9
ENSG00000004468	9
ENSG00000117298	9
ENSG00000204179	9
ENSG00000177106	9
ENSG00000134531	9
ENSG00000135423	9
ENSG00000178184	9
ENSG00000122547	9
ENSG00000136068	9
ENSG00000197901	9
ENSG00000204334	9
ENSG00000110315	9
ENSG00000163701	9
ENSG00000143878	9
ENSG00000175471	9
ENSG00000110841	9
ENSG00000073754	9
ENSG00000179902	9
ENSG00000157087	9
ENSG00000155760	9
ENSG00000145284	9
ENSG00000026297	9
ENSG00000184384	9
ENSG00000178814	9
ENSG00000011638	9
ENSG00000111371	9
ENSG00000198839	9
ENSG00000160193	9
ENSG00000105219	9
ENSG00000092010	9
ENSG00000079616	9
ENSG00000076555	9
ENSG00000075790	9
ENSG00000198756	9
ENSG00000181291	9
ENSG00000149328	9
ENSG00000101236	9
ENSG00000099800	9
ENSG00000010244	9
ENSG00000215375	9
ENSG00000106789	9
ENSG00000167460	9
ENSG00000137766	9
ENSG00000114812	9
ENSG00000166135	9
ENSG00000165138	9
ENSG00000106018	9
ENSG00000050767	9
ENSG00000196557	9
ENSG00000125848	9
ENSG00000145832	9
ENSG00000145868	9
ENSG00000072182	9
ENSG00000103888	9
ENSG00000170430	9
ENSG00000144749	9
ENSG00000077044	9
ENSG00000114853	9
ENSG00000163568	9
ENSG00000170962	9
ENSG00000159377	9
ENSG00000196090	9
ENSG00000072042	9
ENSG00000158186	9
ENSG00000132688	9
ENSG00000136319	9
ENSG00000165417	9
ENSG00000243284	9
ENSG00000145734	9
ENSG00000177084	9
ENSG00000143303	9
ENSG00000158220	9
ENSG00000172687	9
ENSG00000108592	9
ENSG00000077616	9
ENSG00000094914	9
ENSG00000131242	9
ENSG00000196878	9
ENSG00000120896	9
ENSG00000129562	9
ENSG00000065534	9
ENSG00000169047	9
ENSG00000165029	9
ENSG00000076043	9
ENSG00000171680	9
ENSG00000176978	9
ENSG00000165973	9
ENSG00000136933	9
ENSG00000186854	9
ENSG00000108100	9
ENSG00000173801	9
ENSG00000122406	9
ENSG00000154978	9
ENSG00000149639	9
ENSG00000011347	9
ENSG00000152315	9
ENSG00000169976	9
ENSG00000101347	9
ENSG00000179954	9
ENSG00000113319	9
ENSG00000082512	9
ENSG00000172292	9
ENSG00000133943	9
ENSG00000055483	9
ENSG00000091947	9
ENSG00000104998	9
ENSG00000126457	9
ENSG00000103528	8.5
ENSG00000171786	8.5
ENSG00000127564	8.5
ENSG00000155229	8.5
ENSG00000168081	8.5
ENSG00000134574	8.5
ENSG00000197747	8.5
ENSG00000035115	8.5
ENSG00000146122	8.5
ENSG00000182326	8.5
ENSG00000143554	8.5
ENSG00000090661	8.5
ENSG00000091039	8.5
ENSG00000134709	8.5
ENSG00000169752	8.5
ENSG00000116863	8.5
ENSG00000012822	8.5
ENSG00000213918	8.5
ENSG00000170275	8.5
ENSG00000184985	8.5
ENSG00000152954	8.5
ENSG00000196569	8.5
ENSG00000161981	8.5
ENSG00000127507	8.5
ENSG00000158793	8.5
ENSG00000100979	8.5
ENSG00000242110	8.5
ENSG00000165046	8.5
ENSG00000116717	8.5
ENSG00000215475	8.5
ENSG00000172667	8.5
ENSG00000151465	8.5
ENSG00000198945	8.5
ENSG00000001461	8.5
ENSG00000141627	8.5
ENSG00000116096	8.5
ENSG00000137038	8.5
ENSG00000095596	8.5
ENSG00000102893	8.5
ENSG00000101546	8.5
ENSG00000171303	8.5
ENSG00000082397	8.5
ENSG00000165568	8.5
ENSG00000182601	8.5
ENSG00000116213	8.5
ENSG00000197860	8.5
ENSG00000142675	8.5
ENSG00000204252	8.5
ENSG00000115461	8.5
ENSG00000133302	8.5
ENSG00000157927	8.5
ENSG00000135549	8.5
ENSG00000044524	8.5
ENSG00000115350	8.5
ENSG00000151917	8.5
ENSG00000134533	8.5
ENSG00000183722	8.5
ENSG00000101204	8.5
ENSG00000196678	8.5
ENSG00000146352	8.5
ENSG00000117691	8.5
ENSG00000162931	8.5
ENSG00000144824	8.5
ENSG00000115661	8.5
ENSG00000198363	8.5
ENSG00000168830	8.5
ENSG00000140092	8.5
ENSG00000170889	8.5
ENSG00000132259	8.5
ENSG00000161920	8.5
ENSG00000100395	8.5
ENSG00000064763	8.5
ENSG00000124831	8.5
ENSG00000049540	8.5
ENSG00000140526	8.5
ENSG00000176390	8.5
ENSG00000004777	8.5
ENSG00000124207	8.5
ENSG00000163297	8.5
ENSG00000145721	8.5
ENSG00000153774	8.5
ENSG00000124159	8.5
ENSG00000127334	8.5
ENSG00000154127	8.5
ENSG00000134247	8.5
ENSG00000145824	8.5
ENSG00000149196	8.5
ENSG00000196358	8.5
ENSG00000143515	8.5
ENSG00000203485	8.5
ENSG00000117450	8.5
ENSG00000063761	8.5
ENSG00000188735	8.5
ENSG00000106366	8.5
ENSG00000167705	8.5
ENSG00000183379	8.5
ENSG00000182050	8.5
ENSG00000120729	8.5
ENSG00000131368	8.5
ENSG00000270885	8.5
ENSG00000158716	8.5
ENSG00000124299	8.5
ENSG00000106992	8.5
ENSG00000118402	8.5
ENSG00000128045	8.5
ENSG00000100599	8.5
ENSG00000161999	8.5
ENSG00000120696	8.5
ENSG00000175701	8.5
ENSG00000138356	8.5
ENSG00000092969	8.5
ENSG00000070831	8.5
ENSG00000146013	8.5
ENSG00000106948	8.5
ENSG00000007516	8.5
ENSG00000020577	8.5
ENSG00000075702	8.5
ENSG00000148290	8.5
ENSG00000256235	8.5
ENSG00000041880	8.5
ENSG00000106268	8.5
ENSG00000163541	8.5
ENSG00000215788	8.5
ENSG00000180616	8.5
ENSG00000143001	8.5
ENSG00000069188	8.5
ENSG00000196169	8.5
ENSG00000161281	8.5
ENSG00000179546	8.5
ENSG00000114115	8.5
ENSG00000204869	8.5
ENSG00000119899	8.5
ENSG00000001036	8.5
ENSG00000113327	8.5
ENSG00000124203	8.5
ENSG00000152582	8.5
ENSG00000166426	8.5
ENSG00000160472	8.5
ENSG00000123977	8.5
ENSG00000175221	8.5
ENSG00000167123	8.5
ENSG00000147676	8.5
ENSG00000035862	8.5
ENSG00000133063	8.5
ENSG00000150787	8.5
ENSG00000179859	8
ENSG00000151067	8
ENSG00000062038	8
ENSG00000174776	8
ENSG00000120539	8
ENSG00000068878	8
ENSG00000104427	8
ENSG00000180190	8
ENSG00000120647	8
ENSG00000164344	8
ENSG00000006611	8
ENSG00000137154	8
ENSG00000108557	8
ENSG00000013288	8
ENSG00000182566	8
ENSG00000129474	8
ENSG00000139910	8
ENSG00000121210	8
ENSG00000120658	8
ENSG00000154914	8
ENSG00000163909	8
ENSG00000134138	8
ENSG00000124701	8
ENSG00000165887	8
ENSG00000187323	8
ENSG00000101190	8
ENSG00000198246	8
ENSG00000150627	8
ENSG00000176209	8
ENSG00000013810	8
ENSG00000133116	8
ENSG00000005108	8
ENSG00000130702	8
ENSG00000129071	8
ENSG00000156958	8
ENSG00000154065	8
ENSG00000132026	8
ENSG00000122025	8
ENSG00000177600	8
ENSG00000002016	8
ENSG00000104213	8
ENSG00000172137	8
ENSG00000213658	8
ENSG00000139292	8
ENSG00000125780	8
ENSG00000164318	8
ENSG00000112394	8
ENSG00000157985	8
ENSG00000154678	8
ENSG00000104671	8
ENSG00000124209	8
ENSG00000071282	8
ENSG00000116745	8
ENSG00000185418	8
ENSG00000159256	8
ENSG00000180660	8
ENSG00000019485	8
ENSG00000215440	8
ENSG00000164061	8
ENSG00000198286	8
ENSG00000091164	8
ENSG00000185909	8
ENSG00000082014	8
ENSG00000100299	8
ENSG00000137161	8
ENSG00000132676	8
ENSG00000162623	8
ENSG00000163382	8
ENSG00000108231	8
ENSG00000180953	8
ENSG00000154319	8
ENSG00000116151	8
ENSG00000122012	8
ENSG00000152217	8
ENSG00000182667	8
ENSG00000016602	8
ENSG00000138050	8
ENSG00000089847	8
ENSG00000079156	8
ENSG00000164877	8
ENSG00000132164	8
ENSG00000171045	8
ENSG00000197442	8
ENSG00000083544	8
ENSG00000107679	8
ENSG00000069248	8
ENSG00000166484	8
ENSG00000160396	8
ENSG00000137094	8
ENSG00000169220	8
ENSG00000166603	8
ENSG00000166508	8
ENSG00000133687	8
ENSG00000141378	8
ENSG00000100711	8
ENSG00000108556	8
ENSG00000176974	8
ENSG00000167964	8
ENSG00000182196	8
ENSG00000136848	8
ENSG00000148229	8
ENSG00000102547	8
ENSG00000112877	8
ENSG00000080573	8
ENSG00000066735	8
ENSG00000103710	8
ENSG00000267909	8
ENSG00000146374	8
ENSG00000137266	8
ENSG00000108010	8
ENSG00000173452	8
ENSG00000185112	8
ENSG00000162706	8
ENSG00000069020	8
ENSG00000114331	8
ENSG00000165458	8
ENSG00000182022	8
ENSG00000198931	8
ENSG00000143320	8
ENSG00000082684	8
ENSG00000241058	8
ENSG00000135972	8
ENSG00000182359	8
ENSG00000135919	8
ENSG00000108551	8
ENSG00000152402	8
ENSG00000180287	8
ENSG00000198719	8
ENSG00000108370	8
ENSG00000121904	8
ENSG00000197170	8
ENSG00000137409	8
ENSG00000071994	8
ENSG00000010361	8
ENSG00000196353	8
ENSG00000170340	8
ENSG00000137463	8
ENSG00000125449	8
ENSG00000118242	8
ENSG00000117425	8
ENSG00000167081	8
ENSG00000123643	8
ENSG00000204381	8
ENSG00000128285	8
ENSG00000205363	8
ENSG00000146411	8
ENSG00000185345	8
ENSG00000128050	8
ENSG00000080823	8
ENSG00000100865	8
ENSG00000183077	8
ENSG00000161653	8
ENSG00000173918	8
ENSG00000124422	8
ENSG00000132000	8
ENSG00000149292	8
ENSG00000149295	8
ENSG00000173898	8
ENSG00000173715	8
ENSG00000188452	7.5
ENSG00000154813	7.5
ENSG00000141506	7.5
ENSG00000105989	7.5
ENSG00000100983	7.5
ENSG00000065357	7.5
ENSG00000124006	7.5
ENSG00000144649	7.5
ENSG00000172461	7.5
ENSG00000183386	7.5
ENSG00000106123	7.5
ENSG00000083444	7.5
ENSG00000183134	7.5
ENSG00000185634	7.5
ENSG00000206561	7.5
ENSG00000099797	7.5
ENSG00000158296	7.5
ENSG00000184602	7.5
ENSG00000049759	7.5
ENSG00000173269	7.5
ENSG00000186298	7.5
ENSG00000167034	7.5
ENSG00000095713	7.5
ENSG00000205744	7.5
ENSG00000075035	7.5
ENSG00000011105	7.5
ENSG00000189350	7.5
ENSG00000146376	7.5
ENSG00000125037	7.5
ENSG00000197381	7.5
ENSG00000137962	7.5
ENSG00000108839	7.5
ENSG00000275342	7.5
ENSG00000116729	7.5
ENSG00000112511	7.5
ENSG00000169855	7.5
ENSG00000143627	7.5
ENSG00000080493	7.5
ENSG00000153237	7.5
ENSG00000166796	7.5
ENSG00000137261	7.5
ENSG00000121005	7.5
ENSG00000165449	7.5
ENSG00000151208	7.5
ENSG00000114302	7.5
ENSG00000053524	7.5
ENSG00000067113	7.5
ENSG00000214706	7.5
ENSG00000174326	7.5
ENSG00000126603	7.5
ENSG00000172830	7.5
ENSG00000166341	7.5
ENSG00000204387	7.5
ENSG00000060140	7.5
ENSG00000136141	7.5
ENSG00000158109	7.5
ENSG00000197780	7.5
ENSG00000182621	7.5
ENSG00000110900	7.5
ENSG00000175664	7.5
ENSG00000100504	7.5
ENSG00000163545	7.5
ENSG00000101203	7.5
ENSG00000050393	7.5
ENSG00000114904	7.5
ENSG00000071242	7.5
ENSG00000090487	7.5
ENSG00000151882	7.5
ENSG00000170893	7.5
ENSG00000109832	7.5
ENSG00000178104	7.5
ENSG00000132872	7.5
ENSG00000162704	7.5
ENSG00000100124	7.5
ENSG00000114805	7.5
ENSG00000137841	7.5
ENSG00000165140	7.5
ENSG00000184672	7.5
ENSG00000167100	7.5
ENSG00000105419	7.5
ENSG00000143612	7.5
ENSG00000122877	7.5
ENSG00000135968	7.5
ENSG00000172331	7.5
ENSG00000134198	7.5
ENSG00000149403	7.5
ENSG00000168675	7.5
ENSG00000174473	7.5
ENSG00000134330	7.5
ENSG00000185339	7.5
ENSG00000170955	7.5
ENSG00000143862	7.5
ENSG00000139344	7.5
ENSG00000002549	7.5
ENSG00000169604	7.5
ENSG00000106290	7.5
ENSG00000105968	7.5
ENSG00000135547	7.5
ENSG00000167524	7.5
ENSG00000171757	7.5
ENSG00000187773	7.5
ENSG00000266524	7.5
ENSG00000100341	7.5
ENSG00000143851	7.5
ENSG00000112137	7.5
ENSG00000198542	7.5
ENSG00000143499	7.5
ENSG00000146072	7.5
ENSG00000196141	7.5
ENSG00000174136	7.5
ENSG00000029639	7.5
ENSG00000198626	7.5
ENSG00000116906	7.5
ENSG00000066230	7.5
ENSG00000119705	7.5
ENSG00000166106	7.5
ENSG00000167588	7.5
ENSG00000168395	7.5
ENSG00000163444	7.5
ENSG00000090006	7.5
ENSG00000204099	7.5
ENSG00000277494	7.5
ENSG00000204186	7.5
ENSG00000054967	7.5
ENSG00000184465	7.5
ENSG00000112651	7.5
ENSG00000095303	7.5
ENSG00000140090	7.5
ENSG00000132205	7.5
ENSG00000039560	7.5
ENSG00000110921	7.5
ENSG00000139364	7.5
ENSG00000081181	7.5
ENSG00000116209	7.5
ENSG00000141012	7.5
ENSG00000168763	7.5
ENSG00000124302	7.5
ENSG00000156113	7.5
ENSG00000205978	7.5
ENSG00000136153	7.5
ENSG00000197081	7.5
ENSG00000167711	7.5
ENSG00000159208	7.5
ENSG00000146147	7.5
ENSG00000145685	7.5
ENSG00000154721	7.5
ENSG00000120802	7.5
ENSG00000160888	7.5
ENSG00000056736	7.5
ENSG00000124767	7.5
ENSG00000257923	7.5
ENSG00000108830	7.5
ENSG00000096696	7.5
ENSG00000137821	7.5
ENSG00000140932	7.5
ENSG00000164309	7.5
ENSG00000140470	7.5
ENSG00000163682	7.5
ENSG00000182463	7.5
ENSG00000069482	7.5
ENSG00000198734	7.5
ENSG00000266714	7.5
ENSG00000109265	7.5
ENSG00000162869	7.5
ENSG00000175906	7.5
ENSG00000129951	7.5
ENSG00000172232	7.5
ENSG00000182534	7.5
ENSG00000167874	7.5
ENSG00000070159	7.5
ENSG00000172890	7.5
ENSG00000134825	7.5
ENSG00000149218	7.5
ENSG00000130559	7.5
ENSG00000130045	7.5
ENSG00000167280	7.5
ENSG00000117500	7.5
ENSG00000146242	7.5
ENSG00000142534	7.5
ENSG00000141854	7.5
ENSG00000174292	7
ENSG00000115232	7
ENSG00000079150	7
ENSG00000134317	7
ENSG00000156219	7
ENSG00000137364	7
ENSG00000132970	7
ENSG00000159884	7
ENSG00000163956	7
ENSG00000204178	7
ENSG00000128335	7
ENSG00000123143	7
ENSG00000186867	7
ENSG00000127863	7
ENSG00000114026	7
ENSG00000180881	7
ENSG00000156265	7
ENSG00000161217	7
ENSG00000079739	7
ENSG00000010292	7
ENSG00000239474	7
ENSG00000163251	7
ENSG00000117533	7
ENSG00000170142	7
ENSG00000165406	7
ENSG00000166436	7
ENSG00000153064	7
ENSG00000100242	7
ENSG00000159212	7
ENSG00000197872	7
ENSG00000104140	7
ENSG00000163913	7
ENSG00000078967	7
ENSG00000141504	7
ENSG00000197496	7
ENSG00000174611	7
ENSG00000134463	7
ENSG00000185917	7
ENSG00000162929	7
ENSG00000101004	7
ENSG00000168884	7
ENSG00000047457	7
ENSG00000144504	7
ENSG00000123612	7
ENSG00000175183	7
ENSG00000196376	7
ENSG00000134548	7
ENSG00000164692	7
ENSG00000135535	7
ENSG00000121361	7
ENSG00000001460	7
ENSG00000177674	7
ENSG00000000971	7
ENSG00000115155	7
ENSG00000166965	7
ENSG00000066557	7
ENSG00000151025	7
ENSG00000146555	7
ENSG00000141505	7
ENSG00000114654	7
ENSG00000163430	7
ENSG00000174948	7
ENSG00000198189	7
ENSG00000162437	7
ENSG00000035664	7
ENSG00000275700	7
ENSG00000144231	7
ENSG00000183760	7
ENSG00000060566	7
ENSG00000154655	7
ENSG00000053372	7
ENSG00000171509	7
ENSG00000104723	7
ENSG00000170485	7
ENSG00000144228	7
ENSG00000154370	7
ENSG00000124785	7
ENSG00000138759	7
ENSG00000066654	7
ENSG00000066926	7
ENSG00000121060	7
ENSG00000112782	7
ENSG00000059769	7
ENSG00000169621	7
ENSG00000171811	7
ENSG00000089351	7
ENSG00000108582	7
ENSG00000169744	7
ENSG00000144560	7
ENSG00000165548	7
ENSG00000188779	7
ENSG00000154945	7
ENSG00000182606	7
ENSG00000128973	7
ENSG00000196118	7
ENSG00000109586	7
ENSG00000110436	7
ENSG00000153113	7
ENSG00000047662	7
ENSG00000087111	7
ENSG00000169213	7
ENSG00000151883	7
ENSG00000084207	7
ENSG00000142494	7
ENSG00000006282	7
ENSG00000071205	7
ENSG00000160410	7
ENSG00000153048	7
ENSG00000165996	7
ENSG00000145198	7
ENSG00000091136	7
ENSG00000113231	7
ENSG00000115392	7
ENSG00000138031	7
ENSG00000165474	7
ENSG00000082482	7
ENSG00000169507	7
ENSG00000166188	7
ENSG00000237515	7
ENSG00000134686	7
ENSG00000148053	7
ENSG00000277258	7
ENSG00000006377	7
ENSG00000124762	7
ENSG00000171227	7
ENSG00000103021	7
ENSG00000124772	7
ENSG00000138326	7
ENSG00000054179	7
ENSG00000140067	7
ENSG00000111344	7
ENSG00000150636	7
ENSG00000101605	7
ENSG00000104450	7
ENSG00000171552	7
ENSG00000167721	7
ENSG00000060982	7
ENSG00000175455	7
ENSG00000136100	7
ENSG00000158555	7
ENSG00000136104	7
ENSG00000144451	7
ENSG00000116957	7
ENSG00000173065	7
ENSG00000196083	7
ENSG00000133639	7
ENSG00000174780	7
ENSG00000185262	7
ENSG00000095203	7
ENSG00000165617	7
ENSG00000140057	7
ENSG00000184584	7
ENSG00000100784	7
ENSG00000005884	7
ENSG00000133398	7
ENSG00000154237	7
ENSG00000131408	7
ENSG00000108312	7
ENSG00000156463	7
ENSG00000066629	7
ENSG00000197119	7
ENSG00000143850	7
ENSG00000215217	7
ENSG00000151164	6.5
ENSG00000142676	6.5
ENSG00000111696	6.5
ENSG00000100319	6.5
ENSG00000204954	6.5
ENSG00000164171	6.5
ENSG00000139083	6.5
ENSG00000145451	6.5
ENSG00000164181	6.5
ENSG00000173391	6.5
ENSG00000114019	6.5
ENSG00000101670	6.5
ENSG00000074964	6.5
ENSG00000175643	6.5
ENSG00000137857	6.5
ENSG00000145423	6.5
ENSG00000169231	6.5
ENSG00000172671	6.5
ENSG00000240972	6.5
ENSG00000215845	6.5
ENSG00000150051	6.5
ENSG00000115252	6.5
ENSG00000111271	6.5
ENSG00000163273	6.5
ENSG00000144481	6.5
ENSG00000104976	6.5
ENSG00000174600	6.5
ENSG00000168569	6.5
ENSG00000116990	6.5
ENSG00000164258	6.5
ENSG00000105613	6.5
ENSG00000188042	6.5
ENSG00000153233	6.5
ENSG00000102967	6.5
ENSG00000115414	6.5
ENSG00000156299	6.5
ENSG00000107863	6.5
ENSG00000256043	6.5
ENSG00000197077	6.5
ENSG00000111879	6.5
ENSG00000111300	6.5
ENSG00000103197	6.5
ENSG00000139514	6.5
ENSG00000156140	6.5
ENSG00000260456	6.5
ENSG00000196792	6.5
ENSG00000105339	6.5
ENSG00000109736	6.5
ENSG00000134697	6.5
ENSG00000068831	6.5
ENSG00000124587	6.5
ENSG00000111670	6.5
ENSG00000134077	6.5
ENSG00000070785	6.5
ENSG00000131969	6.5
ENSG00000065518	6.5
ENSG00000072778	6.5
ENSG00000140538	6.5
ENSG00000105672	6.5
ENSG00000136261	6.5
ENSG00000169288	6.5
ENSG00000162576	6.5
ENSG00000185043	6.5
ENSG00000119203	6.5
ENSG00000214063	6.5
ENSG00000162722	6.5
ENSG00000073849	6.5
ENSG00000146469	6.5
ENSG00000162551	6.5
ENSG00000124249	6.5
ENSG00000147571	6.5
ENSG00000163923	6.5
ENSG00000005249	6.5
ENSG00000145087	6.5
ENSG00000168843	6.5
ENSG00000114125	6.5
ENSG00000187676	6.5
ENSG00000175414	6.5
ENSG00000175356	6.5
ENSG00000166562	6.5
ENSG00000043355	6.5
ENSG00000086159	6.5
ENSG00000132906	6.5
ENSG00000004776	6.5
ENSG00000137955	6.5
ENSG00000213928	6.5
ENSG00000111850	6.5
ENSG00000124813	6.5
ENSG00000168077	6.5
ENSG00000148484	6.5
ENSG00000080709	6.5
ENSG00000166482	6.5
ENSG00000181458	6.5
ENSG00000151694	6.5
ENSG00000099937	6.5
ENSG00000015532	6.5
ENSG00000155367	6.5
ENSG00000188730	6.5
ENSG00000177984	6.5
ENSG00000113657	6.5
ENSG00000185477	6.5
ENSG00000162733	6.5
ENSG00000196605	6.5
ENSG00000148832	6.5
ENSG00000230989	6.5
ENSG00000176601	6.5
ENSG00000073605	6.5
ENSG00000140961	6.5
ENSG00000130649	6.5
ENSG00000051523	6.5
ENSG00000080200	6.5
ENSG00000119411	6.5
ENSG00000129521	6.5
ENSG00000164253	6.5
ENSG00000132334	6.5
ENSG00000119688	6.5
ENSG00000154640	6.5
ENSG00000105499	6.5
ENSG00000115687	6.5
ENSG00000175985	6.5
ENSG00000138835	6.5
ENSG00000169946	6.5
ENSG00000138964	6.5
ENSG00000197226	6.5
ENSG00000110442	6.5
ENSG00000121769	6.5
ENSG00000186510	6.5
ENSG00000187535	6.5
ENSG00000103381	6.5
ENSG00000138604	6.5
ENSG00000169129	6.5
ENSG00000109610	6.5
ENSG00000152578	6.5
ENSG00000029153	6.5
ENSG00000168491	6.5
ENSG00000204628	6.5
ENSG00000170903	6.5
ENSG00000116793	6.5
ENSG00000162670	6.5
ENSG00000129292	6.5
ENSG00000169900	6.5
ENSG00000135778	6.5
ENSG00000104044	6.5
ENSG00000010310	6.5
ENSG00000139613	6.5
ENSG00000143155	6.5
ENSG00000130731	6.5
ENSG00000163346	6.5
ENSG00000197044	6.5
ENSG00000142173	6.5
ENSG00000116035	6.5
ENSG00000163319	6.5
ENSG00000153822	6.5
ENSG00000133195	6.5
ENSG00000178235	6.5
ENSG00000154310	6.5
ENSG00000186051	6.5
ENSG00000118308	6.5
ENSG00000114251	6.5
ENSG00000146648	6.5
ENSG00000113494	6.5
ENSG00000119699	6.5
ENSG00000101132	6.5
ENSG00000143382	6.5
ENSG00000102854	6.5
ENSG00000177380	6.5
ENSG00000124191	6.5
ENSG00000054803	6.5
ENSG00000119973	6.5
ENSG00000150401	6.5
ENSG00000161544	6.5
ENSG00000152492	6.5
ENSG00000109794	6.5
ENSG00000161647	6.5
ENSG00000129657	6.5
ENSG00000149150	6.5
ENSG00000036672	6.5
ENSG00000151838	6.5
ENSG00000197580	6.5
ENSG00000133048	6.5
ENSG00000177103	6.5
ENSG00000184154	6.5
ENSG00000078295	6.5
ENSG00000134291	6
ENSG00000134294	6
ENSG00000182272	6
ENSG00000188827	6
ENSG00000104714	6
ENSG00000174640	6
[truncated: 803 more rows]
