# Supplementary material for: Single-cell-resolution transcriptome map of human, chimpanzee, bonobo, and macaque brains
Source: HighWire-hosted journal article supplement (doi:10.1101/gr.256958.119), 2020-05-01
Supplement: Supplemental_Table_S4.xlsx [file Supplemental_Table_S4.xlsx]

## Sheet: broad cell types
Table S4. Number of nuclei with at least 500 unique detected molecules in each cluster, per species per region.
H	C	B	M	Region	Cluster
1678	1118	908	3538	AC	Ex	Number of cells
2758	821	1538	1401	AC	In
1347	328	315	359	AC	Ast
340	98	438	303	AC	OD
329	72	291	59	AC	OPC
328	51	173	28	AC	MG	21.1467	%
866	1256	5170	4923	CN	Neu
1165	680	4196	547	CN	OD
1522	456	1701	984	CN	Ast
327	161	558	278	CN	In
110	44	308	72	CN	OPC
231	30	228	25	CN	MG	29.3457	%
20162	3334	11483	5069	CB	Neu
1005	246	280	372	CB	In
274	147	197	266	CB	Ast
186	124	327	118	CB	OD	49.5076	%
37.0575	10.1832	31.9273	20.8321	%
H	C	B	M	Region	Cluster
9.0123	6.00462	4.87674	19.0021	AC	Ex	% of cells per region
14.8128	4.40947	8.26038	7.52457	AC	In
7.23455	1.76164	1.69182	1.92814	AC	Ast
1.82609	0.526344	2.35244	1.62737	AC	OD
1.76701	0.386702	1.56292	0.316881	AC	OPC
1.76164	0.273914	0.929158	0.150384	AC	MG
3.35165	4.86106	20.0093	19.0533	CN	Neu
4.50886	2.63178	16.2396	2.11704	CN	OD
5.89055	1.76484	6.58333	3.80834	CN	Ast
1.26558	0.623113	2.15961	1.07593	CN	In
0.42573	0.170292	1.19204	0.278659	CN	OPC
0.894032	0.116108	0.882421	0.0967567	CN	MG
46.2537	7.64854	26.3432	11.6288	CB	Neu
2.30557	0.56435	0.642349	0.853407	CB	In
0.628585	0.337233	0.451939	0.610232	CB	Ast
0.426703	0.284469	0.750172	0.270704	CB	OD
H	C	B	M	Region	Cluster
24.7493	44.9357	24.7884	62.2011	AC	Ex	% of cells per region per species
40.6785	32.9984	41.9874	24.6308	AC	In
19.8673	13.1833	8.59951	6.31153	AC	Ast
5.01475	3.93891	11.9574	5.327	AC	OD
4.85251	2.89389	7.94431	1.03727	AC	OPC
4.83776	2.04984	4.7229	0.492264	AC	MG
20.5165	47.8112	42.513	72.0896	CN	Neu
27.6001	25.885	34.5037	8.00996	CN	OD
36.0578	17.3582	13.9873	14.4091	CN	Ast
7.74698	6.12866	4.58844	4.07087	CN	In
2.60602	1.67491	2.53269	1.05433	CN	OPC
5.47264	1.14199	1.87485	0.366086	CN	MG
93.2261	86.5749	93.4565	87.0215	CB	Neu
4.64697	6.38795	2.27883	6.38627	CB	In
1.26693	3.81719	1.60332	4.56652	CB	Ast
0.860036	3.21994	2.66135	2.02575	CB	OD

## Sheet: finer sybtypes
H	C	B	M	Region	Cluster
1270	665	443	1986	AC	0	Number of cells
1324	321	284	354	AC	1
1111	227	343	405	AC	2
331	425	422	394	AC	3
370	68	221	629	AC	4
342	98	437	304	AC	5
857	61	206	48	AC	6
98	93	374	432	AC	7
306	332	69	137	AC	8
330	72	292	62	AC	9
362	50	198	109	AC	10
36	51	203	416	AC	11
2	20	115	312	AC	12
41	5	56	100	AC	13	21.1467
538	935	3309	4607	CN	0
1015	347	1633	955	CN	1
624	398	2041	230	CN	2
202	197	1667	146	CN	3
406	199	943	258	CN	4
133	82	1210	59	CN	5
322	150	500	240	CN	6
505	109	67	24	CN	7
125	124	191	168	CN	8
110	45	308	74	CN	9
234	30	232	29	CN	10
7	11	60	39	CN	11	29.3457
19621	3214	10352	4711	CB	0
1007	246	280	373	CB	1
442	112	577	118	CB	2
95	7	551	239	CB	3
276	148	200	266	CB	4
186	124	327	118	CB	5	49.5076
37.0575	10.1832	31.9273	20.8321	%
H	C	B	M	Region	Cluster
6.82099	3.57162	2.37929	10.6665	AC	0	% of cells per region
7.11102	1.72405	1.52532	1.90128	AC	1
5.96702	1.21918	1.8422	2.1752	AC	2
1.77775	2.28261	2.2665	2.11612	AC	3
1.98722	0.365218	1.18696	3.37827	AC	4
1.83683	0.526344	2.34706	1.63274	AC	5
4.60283	0.327622	1.1064	0.257801	AC	6
0.526344	0.49949	2.0087	2.32021	AC	7
1.64348	1.78312	0.370589	0.735808	AC	8
1.77238	0.386702	1.56829	0.332993	AC	9
1.94425	0.268543	1.06343	0.585423	AC	10
0.193351	0.273914	1.09028	2.23428	AC	11
0.0107417	0.107417	0.617649	1.67571	AC	12
0.220205	0.0268543	0.300768	0.537086	AC	13
2.0822	3.6187	12.8067	17.8303	CN	0
3.92832	1.34298	6.32015	3.69611	CN	1
2.41505	1.54037	7.89922	0.890162	CN	2
0.781794	0.762443	6.45174	0.565059	CN	3
1.57133	0.770183	3.64966	0.998529	CN	4
0.514746	0.317362	4.68303	0.228346	CN	5
1.24623	0.58054	1.93513	0.928864	CN	6
1.95449	0.421859	0.259308	0.0928864	CN	7
0.483784	0.479913	0.739221	0.650205	CN	8
0.42573	0.174162	1.19204	0.2864	CN	9
0.905643	0.116108	0.897902	0.112238	CN	10
0.0270919	0.042573	0.232216	0.15094	CN	11
45.0126	7.37325	23.7486	10.8075	CB	0
2.31016	0.56435	0.642349	0.855701	CB	1
1.01399	0.25694	1.3237	0.270704	CB	2
0.21794	0.0160587	1.26405	0.548291	CB	3
0.633173	0.339527	0.458821	0.610232	CB	4
0.426703	0.284469	0.750172	0.270704	CB	5
H	C	B	M	Region	Cluster
18.7316	26.7283	12.0939	34.9156	AC	0	% of cells per region per species
19.528	12.9019	7.75321	6.22363	AC	1
16.3864	9.12379	9.36391	7.12025	AC	2
4.88201	17.082	11.5206	6.92686	AC	3
5.45723	2.73312	6.03331	11.0584	AC	4
5.04425	3.93891	11.9301	5.34459	AC	5
12.6401	2.45177	5.62381	0.843882	AC	6
1.44543	3.73794	10.2102	7.59494	AC	7
4.51327	13.3441	1.8837	2.40858	AC	8
4.86726	2.89389	7.97161	1.09001	AC	9
5.33923	2.00965	5.40541	1.91632	AC	10
0.530973	2.04984	5.54191	7.31364	AC	11
0.0294985	0.803859	3.1395	5.48523	AC	12
0.60472	0.200965	1.5288	1.75809	AC	13
12.7458	35.5919	27.2099	67.4623	CN	0
24.0464	13.209	13.4282	13.9845	CN	1
14.7832	15.1504	16.7832	3.36799	CN	2
4.7856	7.49905	13.7078	2.13794	CN	3
9.61857	7.57518	7.7543	3.77801	CN	4
3.15091	3.12143	9.94984	0.863963	CN	5
7.62852	5.70994	4.1115	3.51442	CN	6
11.964	4.14922	0.550942	0.351442	CN	7
2.96138	4.72021	1.57059	2.4601	CN	8
2.60602	1.71298	2.53269	1.08361	CN	9
5.54371	1.14199	1.90774	0.42466	CN	10
0.165837	0.418729	0.49338	0.571094	CN	11
90.7246	83.4588	84.2516	80.8755	CB	0
4.65622	6.38795	2.27883	6.40343	CB	1
2.04374	2.90834	4.69602	2.02575	CB	2
0.439266	0.181771	4.48441	4.103	CB	3
1.27618	3.84316	1.62774	4.56652	CB	4
0.860036	3.21994	2.66135	2.02575	CB	5
