# Supplementary material for: Single-cell-resolution transcriptome map of human, chimpanzee, bonobo, and macaque brains
Source: HighWire-hosted journal article supplement (doi:10.1101/gr.256958.119), 2020-05-01
Supplement: Supplemental_Table_S5.xlsx [file Supplemental_Table_S5.xlsx]

## Sheet: Sheet1
Table S5. Genes preferentially expressed in a specific cell type.
Cell Type	Gene
AC In	ENSG00000136750
AC In	ENSG00000145824
AC In	ENSG00000128683
AC In	ENSG00000163630
AC In	ENSG00000157103
AC In	ENSG00000188042
AC In	ENSG00000187957
AC In	ENSG00000178568
AC In	ENSG00000151789
AC In	ENSG00000157005
AC In	ENSG00000172137
AC In	ENSG00000145864
AC In	ENSG00000029534
AC In	ENSG00000171189
AC In	ENSG00000198886
AC In	ENSG00000196628
AC In	ENSG00000101438
AC In	ENSG00000198899
AC In	ENSG00000175352
AC In	ENSG00000017427
AC In	ENSG00000166863
AC In	ENSG00000171951
AC In	ENSG00000101489
AC In	ENSG00000198938
AC In	ENSG00000117707
AC In	ENSG00000114631
AC In	ENSG00000006128
AC In	ENSG00000005108
AC In	ENSG00000198840
AC In	ENSG00000152932
AC In	ENSG00000186310
AC In	ENSG00000198825
AC In	ENSG00000173482
AC In	ENSG00000189056
AC In	ENSG00000198712
AC In	ENSG00000170419
AC In	ENSG00000198763
AC In	ENSG00000251503
AC In	ENSG00000168081
AC In	ENSG00000106852
AC In	ENSG00000225968
AC In	ENSG00000147571
AC In	ENSG00000021645
AC In	ENSG00000196104
AC In	ENSG00000022355
AC In	ENSG00000145708
AC In	ENSG00000170540
AC In	ENSG00000174469
AC In	ENSG00000182287
AC In	ENSG00000146469
AC In	ENSG00000144596
AC In	ENSG00000198727
AC In	ENSG00000145730
AC In	ENSG00000074527
AC In	ENSG00000144642
AC In	ENSG00000151136
AC In	ENSG00000273079
AC In	ENSG00000240694
AC In	ENSG00000111371
AC In	ENSG00000152377
AC In	ENSG00000130751
AC In	ENSG00000170873
AC In	ENSG00000122012
AC In	ENSG00000159164
AC In	ENSG00000204103
AC In	ENSG00000101180
AC In	ENSG00000163888
AC In	ENSG00000182132
AC In	ENSG00000185052
AC In	ENSG00000035862
AC In	ENSG00000115963
AC In	ENSG00000153012
AC In	ENSG00000188730
AC In	ENSG00000185551
AC In	ENSG00000185565
AC In	ENSG00000167642
AC In	ENSG00000124191
AC In	ENSG00000145681
AC In	ENSG00000007402
AC In	ENSG00000182836
AC In	ENSG00000100362
AC In	ENSG00000185736
AC In	ENSG00000206579
AC In	ENSG00000154127
AC In	ENSG00000250305
AC In	ENSG00000120903
AC In	ENSG00000130294
AC In	ENSG00000174938
AC In	ENSG00000145920
AC In	ENSG00000156299
AC In	ENSG00000153707
AC In	ENSG00000152910
AC In	ENSG00000077264
AC In	ENSG00000161544
AC In	ENSG00000100077
AC In	ENSG00000105409
AC In	ENSG00000168032
AC In	ENSG00000087494
AC In	ENSG00000101204
AC In	ENSG00000143248
AC In	ENSG00000180287
AC In	ENSG00000169282
AC In	ENSG00000164418
AC In	ENSG00000124749
AC In	ENSG00000182256
AC In	ENSG00000156076
AC In	ENSG00000205078
AC In	ENSG00000102466
AC In	ENSG00000188158
AC In	ENSG00000151276
AC In	ENSG00000177875
AC In	ENSG00000127328
AC In	ENSG00000162989
AC In	ENSG00000151229
AC In	ENSG00000047849
AC In	ENSG00000196090
AC In	ENSG00000196526
AC In	ENSG00000103154
AC In	ENSG00000060982
AC In	ENSG00000107105
AC In	ENSG00000107242
AC In	ENSG00000120907
AC In	ENSG00000077279
AC In	ENSG00000057294
AC In	ENSG00000167619
AC In	ENSG00000168843
AC In	ENSG00000277363
AC In	ENSG00000111913
AC In	ENSG00000198786
AC In	ENSG00000115353
AC In	ENSG00000148053
AC In	ENSG00000105464
AC In	ENSG00000183044
AC In	ENSG00000183454
AC In	ENSG00000103460
AC In	ENSG00000077044
AC In	ENSG00000144355
AC In	ENSG00000101856
AC In	ENSG00000155093
AC In	ENSG00000111897
AC In	ENSG00000087448
AC In	ENSG00000145495
AC In	ENSG00000157064
AC In	ENSG00000145194
AC In	ENSG00000169213
AC In	ENSG00000198804
AC In	ENSG00000157193
AC In	ENSG00000189184
AC In	ENSG00000170049
AC In	ENSG00000196767
AC In	ENSG00000115977
AC In	ENSG00000081138
AC In	ENSG00000178662
AC In	ENSG00000065923
AC In	ENSG00000112319
AC In	ENSG00000215475
AC In	ENSG00000155974
AC In	ENSG00000156687
AC In	ENSG00000248485
AC In	ENSG00000114279
AC In	ENSG00000213626
AC In	ENSG00000171150
AC In	ENSG00000147481
AC In	ENSG00000157837
AC In	ENSG00000174473
AC In	ENSG00000174460
AC In	ENSG00000142235
AC In	ENSG00000072182
AC In	ENSG00000087460
AC In	ENSG00000168243
AC In	ENSG00000171603
AC In	ENSG00000186732
AC In	ENSG00000134352
AC In	ENSG00000166006
AC In	ENSG00000108684
AC In	ENSG00000127152
AC In	ENSG00000119973
AC In	ENSG00000067715
AC In	ENSG00000165061
AC In	ENSG00000123124
AC In	ENSG00000166848
AC In	ENSG00000138193
AC In	ENSG00000166710
AC In	ENSG00000171303
AC In	ENSG00000101460
AC In	ENSG00000172292
AC In	ENSG00000139364
AC In	ENSG00000102678
AC In	ENSG00000116005
AC In	ENSG00000132970
AC In	ENSG00000139970
AC In	ENSG00000070882
AC In	ENSG00000113532
AC In	ENSG00000006377
AC In	ENSG00000147041
AC In	ENSG00000167524
AC In	ENSG00000164651
AC In	ENSG00000146648
AC In	ENSG00000128591
AC In	ENSG00000152578
AC In	ENSG00000129159
AC In	ENSG00000165572
AC In	ENSG00000155158
AC In	ENSG00000189060
AC In	ENSG00000078295
AC In	ENSG00000068615
AC In	ENSG00000130643
AC In	ENSG00000153933
AC In	ENSG00000107742
AC In	ENSG00000205339
AC In	ENSG00000144619
AC In	ENSG00000162595
AC In	ENSG00000177432
AC In	ENSG00000089169
AC In	ENSG00000096384
AC In	ENSG00000115718
AC In	ENSG00000132932
AC In	ENSG00000165152
AC In	ENSG00000101098
AC In	ENSG00000171208
AC In	ENSG00000177519
AC In	ENSG00000206432
AC In	ENSG00000185008
AC In	ENSG00000130202
AC In	ENSG00000170396
AC In	ENSG00000166862
AC In	ENSG00000071553
AC In	ENSG00000173320
AC In	ENSG00000197177
AC In	ENSG00000171867
AC In	ENSG00000156642
AC In	ENSG00000122126
AC In	ENSG00000114805
AC In	ENSG00000144285
AC In	ENSG00000164070
AC In	ENSG00000107864
AC In	ENSG00000054356
AC In	ENSG00000140323
AC In	ENSG00000132718
AC In	ENSG00000155886
AC In	ENSG00000143153
AC In	ENSG00000166025
AC In	ENSG00000139278
AC In	ENSG00000109158
AC In	ENSG00000198300
AC In	ENSG00000181195
AC In	ENSG00000092096
AC In	ENSG00000019505
AC In	ENSG00000166780
AC In	ENSG00000189337
AC In	ENSG00000112293
AC In	ENSG00000053254
AC In	ENSG00000105613
AC In	ENSG00000165084
AC In	ENSG00000104967
AC In	ENSG00000109436
AC In	ENSG00000187094
AC In	ENSG00000184156
AC In	ENSG00000133872
AC In	ENSG00000168916
AC In	ENSG00000122025
AC In	ENSG00000198642
AC In	ENSG00000184545
AC In	ENSG00000146054
AC In	ENSG00000129636
AC In	ENSG00000132975
AC In	ENSG00000242265
AC In	ENSG00000118276
AC In	ENSG00000185615
AC In	ENSG00000161082
AC In	ENSG00000075391
AC In	ENSG00000186648
AC In	ENSG00000145147
AC In	ENSG00000260230
AC In	ENSG00000184992
AC In	ENSG00000184408
AC In	ENSG00000070601
AC In	ENSG00000143434
AC In	ENSG00000168993
AC In	ENSG00000068400
AC In	ENSG00000182197
AC In	ENSG00000114270
AC In	ENSG00000100320
AC In	ENSG00000135541
AC In	ENSG00000183166
AC In	ENSG00000065717
AC In	ENSG00000164442
AC In	ENSG00000136940
AC In	ENSG00000176463
AC In	ENSG00000094916
AC In	ENSG00000110002
AC In	ENSG00000183715
AC In	ENSG00000144583
AC In	ENSG00000107147
AC In	ENSG00000171724
AC In	ENSG00000130024
AC In	ENSG00000149575
AC In	ENSG00000167468
AC In	ENSG00000163328
AC In	ENSG00000166448
AC In	ENSG00000120693
AC In	ENSG00000150938
AC In	ENSG00000116675
AC In	ENSG00000070413
AC In	ENSG00000078177
AC In	ENSG00000124140
AC In	ENSG00000162458
AC In	ENSG00000163873
AC In	ENSG00000198380
AC In	ENSG00000013293
AC In	ENSG00000155897
AC In	ENSG00000172915
AC In	ENSG00000100918
AC In	ENSG00000122585
AC In	ENSG00000008056
AC In	ENSG00000146674
AC In	ENSG00000125841
AC In	ENSG00000188573
AC In	ENSG00000125895
AC In	ENSG00000258986
AC In	ENSG00000104695
AC In	ENSG00000135924
AC In	ENSG00000171105
AC In	ENSG00000170091
AC In	ENSG00000073464
AC In	ENSG00000134852
AC In	ENSG00000102804
AC In	ENSG00000169760
AC In	ENSG00000247315
AC In	ENSG00000174136
AC In	ENSG00000151067
AC In	ENSG00000105429
AC In	ENSG00000057019
AC In	ENSG00000116991
AC In	ENSG00000006432
AC In	ENSG00000171132
AC In	ENSG00000137962
AC In	ENSG00000152217
AC In	ENSG00000162105
AC In	ENSG00000140945
AC In	ENSG00000064999
AC In	ENSG00000167005
AC In	ENSG00000005884
AC In	ENSG00000129245
AC In	ENSG00000105993
AC In	ENSG00000166619
AC In	ENSG00000157388
AC In	ENSG00000275302
AC In	ENSG00000149582
AC In	ENSG00000106460
AC In	ENSG00000087301
AC In	ENSG00000144227
AC In	ENSG00000188021
AC In	ENSG00000215217
AC In	ENSG00000100346
AC In	ENSG00000160058
AC In	ENSG00000198162
AC In	ENSG00000176490
AC In	ENSG00000170579
AC In	ENSG00000146267
AC In	ENSG00000099365
AC Ex	ENSG00000104888
AC Ex	ENSG00000171246
AC Ex	ENSG00000128656
AC Ex	ENSG00000185518
AC Ex	ENSG00000168490
AC Ex	ENSG00000120899
AC Ex	ENSG00000109670
AC Ex	ENSG00000172995
AC Ex	ENSG00000175866
AC Ex	ENSG00000070808
AC Ex	ENSG00000171617
AC Ex	ENSG00000138814
AC Ex	ENSG00000011347
AC Ex	ENSG00000135426
AC Ex	ENSG00000072110
AC Ex	ENSG00000130558
AC Ex	ENSG00000169783
AC Ex	ENSG00000171532
AC Ex	ENSG00000110931
AC Ex	ENSG00000186642
AC Ex	ENSG00000070961
AC Ex	ENSG00000163032
AC Ex	ENSG00000066248
AC Ex	ENSG00000134343
AC Ex	ENSG00000157782
AC Ex	ENSG00000165023
AC Ex	ENSG00000004660
AC Ex	ENSG00000136854
AC Ex	ENSG00000277586
AC Ex	ENSG00000171476
AC Ex	ENSG00000107295
AC Ex	ENSG00000074590
AC Ex	ENSG00000103184
AC Ex	ENSG00000123119
AC Ex	ENSG00000162817
AC Ex	ENSG00000124785
AC Ex	ENSG00000198682
AC Ex	ENSG00000119042
AC Ex	ENSG00000172020
AC Ex	ENSG00000112186
AC Ex	ENSG00000167281
AC Ex	ENSG00000102471
AC Ex	ENSG00000139220
AC Ex	ENSG00000169032
AC Ex	ENSG00000169085
AC Ex	ENSG00000011083
AC Ex	ENSG00000156011
AC Ex	ENSG00000154277
AC Ex	ENSG00000127824
AC Ex	ENSG00000092445
AC Ex	ENSG00000129990
AC Ex	ENSG00000115756
AC Ex	ENSG00000108960
AC Ex	ENSG00000126583
AC Ex	ENSG00000164951
AC Ex	ENSG00000104435
AC Ex	ENSG00000157152
AC Ex	ENSG00000121753
AC Ex	ENSG00000182809
AC Ex	ENSG00000198626
AC Ex	ENSG00000106367
AC Ex	ENSG00000006210
AC Ex	ENSG00000196950
AC Ex	ENSG00000132639
AC Ex	ENSG00000116983
AC Ex	ENSG00000107758
AC Ex	ENSG00000149091
AC Ex	ENSG00000137815
AC Ex	ENSG00000256500
AC Ex	ENSG00000116254
AC Ex	ENSG00000176749
AC Ex	ENSG00000166913
AC Ex	ENSG00000128989
AC Ex	ENSG00000058404
AC Ex	ENSG00000175182
AC Ex	ENSG00000125814
AC Ex	ENSG00000196990
AC Ex	ENSG00000143420
AC Ex	ENSG00000145675
AC Ex	ENSG00000136531
AC Ex	ENSG00000078902
AC Ex	ENSG00000164076
AC Ex	ENSG00000076864
AC Ex	ENSG00000244405
AC Ex	ENSG00000074317
AC Ex	ENSG00000067715
AC Ex	ENSG00000020129
AC Ex	ENSG00000184702
AC Ex	ENSG00000137409
AC Ex	ENSG00000132872
AC Ex	ENSG00000165434
AC Ex	ENSG00000221890
AC Ex	ENSG00000149187
AC Ex	ENSG00000147416
AC Ex	ENSG00000054793
AC Ex	ENSG00000091129
AC Ex	ENSG00000105696
AC Ex	ENSG00000131711
AC Ex	ENSG00000123416
AC Ex	ENSG00000081189
AC Ex	ENSG00000138443
AC Ex	ENSG00000157216
AC Ex	ENSG00000167522
AC Ex	ENSG00000163399
AC Ex	ENSG00000100505
AC Ex	ENSG00000108309
AC Ex	ENSG00000183741
AC Ex	ENSG00000136928
AC Ex	ENSG00000168000
AC Ex	ENSG00000110076
AC Ex	ENSG00000104833
AC Ex	ENSG00000134909
AC Ex	ENSG00000176406
AC Ex	ENSG00000055163
AC Ex	ENSG00000109339
AC Ex	ENSG00000102003
AC Ex	ENSG00000145734
AC Ex	ENSG00000167654
AC Ex	ENSG00000145362
AC Ex	ENSG00000176884
AC Ex	ENSG00000132824
AC Ex	ENSG00000105649
AC Ex	ENSG00000150625
AC Ex	ENSG00000185046
AC Ex	ENSG00000105223
AC Ex	ENSG00000033627
AC Ex	ENSG00000096384
AC Ex	ENSG00000089737
AC Ex	ENSG00000115310
AC Ex	ENSG00000258643
AC Ex	ENSG00000092964
AC Ex	ENSG00000103034
AC Ex	ENSG00000088538
AC Ex	ENSG00000184009
AC Ex	ENSG00000197555
AC Ex	ENSG00000183020
AC Ex	ENSG00000133169
AC Ex	ENSG00000014641
AC Ex	ENSG00000115194
AC Ex	ENSG00000120738
AC Ex	ENSG00000105701
AC Ex	ENSG00000104490
AC Ex	ENSG00000072071
AC Ex	ENSG00000183023
AC Ex	ENSG00000241973
AC Ex	ENSG00000137501
AC Ex	ENSG00000165300
AC Ex	ENSG00000064607
AC Ex	ENSG00000162065
AC Ex	ENSG00000112320
AC Ex	ENSG00000123358
AC Ex	ENSG00000177542
AC Ex	ENSG00000117600
AC Ex	ENSG00000145632
AC Ex	ENSG00000100379
AC Ex	ENSG00000169744
AC Ex	ENSG00000010322
AC Ex	ENSG00000111912
AC Ex	ENSG00000198420
AC Ex	ENSG00000130540
AC Ex	ENSG00000240771
AC Ex	ENSG00000149927
AC Ex	ENSG00000103657
AC Ex	ENSG00000074211
AC Ex	ENSG00000005810
AC Ex	ENSG00000110786
AC Ex	ENSG00000109466
AC Ex	ENSG00000182670
AC Ex	ENSG00000069424
AC Ex	ENSG00000168135
AC Ex	ENSG00000143013
AC Ex	ENSG00000204843
AC Ex	ENSG00000100321
AC Ex	ENSG00000145087
AC Ex	ENSG00000164506
AC Ex	ENSG00000160007
AC Ex	ENSG00000139174
AC Ex	ENSG00000105887
AC Ex	ENSG00000141837
AC Ex	ENSG00000184602
AC Ex	ENSG00000198794
AC Ex	ENSG00000084731
AC Ex	ENSG00000139116
AC Ex	ENSG00000179456
AC Ex	ENSG00000073670
AC Ex	ENSG00000138834
AC Ex	ENSG00000168280
AC Ex	ENSG00000160469
AC Ex	ENSG00000059915
AC Ex	ENSG00000122966
AC Ex	ENSG00000165802
AC Ex	ENSG00000075624
AC Ex	ENSG00000127511
AC Ex	ENSG00000198929
AC Ex	ENSG00000186487
AC Ex	ENSG00000162374
AC Ex	ENSG00000099991
AC Ex	ENSG00000250510
AC Ex	ENSG00000174514
AC Ex	ENSG00000050165
AC Ex	ENSG00000117632
AC Ex	ENSG00000144834
AC Ex	ENSG00000176956
AC Ex	ENSG00000139318
AC Ex	ENSG00000179915
AC Ex	ENSG00000107679
AC Ex	ENSG00000174672
AC Ex	ENSG00000115252
AC Ex	ENSG00000138078
AC Ex	ENSG00000166681
AC Ex	ENSG00000260916
AC Ex	ENSG00000011052
AC Ex	ENSG00000136237
AC Ex	ENSG00000088992
AC Ex	ENSG00000145335
AC Ex	ENSG00000185742
AC Ex	ENSG00000019505
AC Ex	ENSG00000104722
AC Ex	ENSG00000116539
AC Ex	ENSG00000136153
AC Ex	ENSG00000156515
AC Ex	ENSG00000159842
AC Ex	ENSG00000067840
AC Ex	ENSG00000137642
AC Ex	ENSG00000061337
AC Ex	ENSG00000008441
AC Ex	ENSG00000077380
AC Ex	ENSG00000124772
AC Ex	ENSG00000010818
AC Ex	ENSG00000115738
AC Ex	ENSG00000160460
AC Ex	ENSG00000102468
AC Ex	ENSG00000145526
AC Ex	ENSG00000099365
AC Ex	ENSG00000034053
AC Ex	ENSG00000117016
AC Ex	ENSG00000115041
AC Ex	ENSG00000089847
AC Ex	ENSG00000132294
AC Ex	ENSG00000139112
AC Ex	ENSG00000124507
AC Ex	ENSG00000198598
AC Ex	ENSG00000197106
AC Ex	ENSG00000130402
AC Ex	ENSG00000244588
AC Ex	ENSG00000198576
AC Ex	ENSG00000004059
AC Ex	ENSG00000142949
AC Ex	ENSG00000166974
AC Ex	ENSG00000128482
AC Ex	ENSG00000102226
AC Ex	ENSG00000103994
AC Ex	ENSG00000008853
AC Ex	ENSG00000168785
AC Ex	ENSG00000100276
AC Ex	ENSG00000166963
AC Ex	ENSG00000198910
AC Ex	ENSG00000107954
AC Ex	ENSG00000160145
AC Ex	ENSG00000172301
AC Ex	ENSG00000161835
AC Ex	ENSG00000128739
AC Ex	ENSG00000109971
AC Ex	ENSG00000132563
AC Ex	ENSG00000122359
AC Ex	ENSG00000254999
AC Ex	ENSG00000276293
AC Ex	ENSG00000102606
AC Ex	ENSG00000168438
AC Ex	ENSG00000182013
AC Ex	ENSG00000146021
AC Ex	ENSG00000114948
AC Ex	ENSG00000100027
AC Ex	ENSG00000011332
AC Ex	ENSG00000007168
AC Ex	ENSG00000172803
AC Ex	ENSG00000140983
AC Ex	ENSG00000150995
AC Ex	ENSG00000067191
AC Ex	ENSG00000149970
AC Ex	ENSG00000187446
AC Ex	ENSG00000078053
AC Ex	ENSG00000141522
AC Ex	ENSG00000153815
AC Ex	ENSG00000073910
AC Ex	ENSG00000106012
AC Ex	ENSG00000152784
AC Ex	ENSG00000167535
AC Ex	ENSG00000167549
AC Ex	ENSG00000170091
AC Ex	ENSG00000172915
AC Ex	ENSG00000135931
AC Ex	ENSG00000131089
AC Ex	ENSG00000121905
AC Ex	ENSG00000115419
AC Ex	ENSG00000174996
AC Ex	ENSG00000064042
AC Ex	ENSG00000170558
AC Ex	ENSG00000081760
AC Ex	ENSG00000175874
AC Ex	ENSG00000100503
AC Ex	ENSG00000050748
AC Ex	ENSG00000137825
AC Ex	ENSG00000101349
AC Ex	ENSG00000053438
AC Ex	ENSG00000110514
AC Ex	ENSG00000151461
AC Ex	ENSG00000125482
AC Ex	ENSG00000141668
AC Ex	ENSG00000006116
AC Ex	ENSG00000114554
AC Ex	ENSG00000197043
AC Ex	ENSG00000119866
AC Ex	ENSG00000067842
AC Ex	ENSG00000108654
AC Ex	ENSG00000047249
AC Ex	ENSG00000008513
AC Ex	ENSG00000143847
AC Ex	ENSG00000205593
AC Ex	ENSG00000198915
AC Ex	ENSG00000143156
AC Ex	ENSG00000172209
AC Ex	ENSG00000157557
AC Ex	ENSG00000172575
AC Ex	ENSG00000141027
AC Ex	ENSG00000075151
AC Ex	ENSG00000178965
AC Ex	ENSG00000111642
AC Ex	ENSG00000032219
AC Ex	ENSG00000154027
AC Ex	ENSG00000117480
AC Ex	ENSG00000077235
AC Ex	ENSG00000159409
AC Ex	ENSG00000175166
AC Ex	ENSG00000100604
AC Ex	ENSG00000088367
AC Ex	ENSG00000113749
AC Ex	ENSG00000065243
AC Ex	ENSG00000079819
AC Ex	ENSG00000178467
AC Ex	ENSG00000123200
AC Ex	ENSG00000142875
AC Ex	ENSG00000113758
AC Ex	ENSG00000133134
AC Ex	ENSG00000048991
AC Ex	ENSG00000067836
AC Ex	ENSG00000144567
AC Ex	ENSG00000073756
AC Ex	ENSG00000106829
AC Ex	ENSG00000188229
AC Ex	ENSG00000171703
AC Ex	ENSG00000089693
AC Ex	ENSG00000125851
AC Ex	ENSG00000102882
AC Ex	ENSG00000143850
AC Ex	ENSG00000131067
AC Ex	ENSG00000165868
AC Ex	ENSG00000174684
AC Ex	ENSG00000152413
AC Ex	ENSG00000078269
AC Ex	ENSG00000015676
AC Ex	ENSG00000189367
AC Ex	ENSG00000187672
AC Ex	ENSG00000166501
AC Ex	ENSG00000131507
AC Ex	ENSG00000104093
AC Ex	ENSG00000108018
AC Ex	ENSG00000072832
AC Ex	ENSG00000058091
AC Ex	ENSG00000167778
AC Ex	ENSG00000111262
AC Ex	ENSG00000105402
AC Ex	ENSG00000175426
AC Ex	ENSG00000106236
AC Ex	ENSG00000158445
AC Ex	ENSG00000102109
AC Ex	ENSG00000147548
AC Ex	ENSG00000138758
AC Ex	ENSG00000179542
AC Ex	ENSG00000127663
AC Ex	ENSG00000196653
AC Ex	ENSG00000184845
AC Ex	ENSG00000196235
AC Ex	ENSG00000078725
AC Ex	ENSG00000135108
AC Ex	ENSG00000116731
AC Ex	ENSG00000164151
AC Ex	ENSG00000061676
AC Ex	ENSG00000186297
AC Ex	ENSG00000155980
AC Ex	ENSG00000058272
AC Ex	ENSG00000105127
AC Ex	ENSG00000177614
AC Ex	ENSG00000135916
AC Ex	ENSG00000122873
AC Ex	ENSG00000215788
AC Ex	ENSG00000056097
AC Ex	ENSG00000100647
AC Ex	ENSG00000105404
AC Ex	ENSG00000106078
AC Ex	ENSG00000063180
AC Ex	ENSG00000176095
AC Ex	ENSG00000068305
AC Ex	ENSG00000106617
AC Ex	ENSG00000130222
AC Ex	ENSG00000100401
AC Ex	ENSG00000198171
AC Ex	ENSG00000186566
AC Ex	ENSG00000166479
AC Ex	ENSG00000158417
AC Ex	ENSG00000157470
AC Ex	ENSG00000180530
AC Ex	ENSG00000175931
AC Ex	ENSG00000148248
AC Ex	ENSG00000163466
AC Ex	ENSG00000204186
AC Ex	ENSG00000100884
AC Ex	ENSG00000110318
AC Ex	ENSG00000119125
AC Ex	ENSG00000102879
AC Ex	ENSG00000125510
AC Ex	ENSG00000159692
AC Ex	ENSG00000116584
AC Ex	ENSG00000186847
AC Ex	ENSG00000167964
AC Ex	ENSG00000102409
AC Ex	ENSG00000162630
AC Ex	ENSG00000116741
AC Ex	ENSG00000082641
AC Ex	ENSG00000196376
AC Ex	ENSG00000108091
AC Ex	ENSG00000134644
AC Ex	ENSG00000151612
AC Ex	ENSG00000158560
AC Ex	ENSG00000221968
AC Ex	ENSG00000113387
AC Ex	ENSG00000142453
AC Ex	ENSG00000130985
AC Ex	ENSG00000132670
AC Ex	ENSG00000153234
AC Ex	ENSG00000052126
AC Ex	ENSG00000163618
AC Ex	ENSG00000198898
AC Ex	ENSG00000255154
AC Ex	ENSG00000078140
AC Ex	ENSG00000110987
AC Ex	ENSG00000135643
AC Ex	ENSG00000170871
AC Ex	ENSG00000153253
AC Ex	ENSG00000123901
AC Ex	ENSG00000134186
AC Ex	ENSG00000198822
AC Ex	ENSG00000164830
AC Ex	ENSG00000129355
AC Ex	ENSG00000108424
AC Ex	ENSG00000185760
AC Ex	ENSG00000144711
AC Ex	ENSG00000168546
AC Ex	ENSG00000007264
AC Ex	ENSG00000185070
AC Ex	ENSG00000148798
AC Ex	ENSG00000160710
AC Ex	ENSG00000161082
AC Ex	ENSG00000109756
AC Ex	ENSG00000122778
AC Ex	ENSG00000163485
AC Ex	ENSG00000204590
AC Ex	ENSG00000179262
AC Ex	ENSG00000175497
AC Ex	ENSG00000103855
AC Ex	ENSG00000105419
AC Ex	ENSG00000112640
AC Ex	ENSG00000068024
AC Ex	ENSG00000136193
AC Ex	ENSG00000166900
AC Ex	ENSG00000196396
AC Ex	ENSG00000213672
AC Ex	ENSG00000144959
AC Ex	ENSG00000135315
AC Ex	ENSG00000185924
AC Ex	ENSG00000166257
AC Ex	ENSG00000164128
AC Ex	ENSG00000104218
AC Ex	ENSG00000154914
AC Ex	ENSG00000135750
AC Ex	ENSG00000100207
AC Ex	ENSG00000197147
AC Ex	ENSG00000063015
AC Ex	ENSG00000113231
AC Ex	ENSG00000048740
AC Ex	ENSG00000134440
AC Ex	ENSG00000135720
AC Ex	ENSG00000113327
AC Ex	ENSG00000099814
AC Ex	ENSG00000125648
AC Ex	ENSG00000100605
AC Ex	ENSG00000183117
AC Ex	ENSG00000114812
AC Ex	ENSG00000168539
AC Ex	ENSG00000089199
AC Ex	ENSG00000107951
AC Ex	ENSG00000103723
AC Ex	ENSG00000196072
AC Ex	ENSG00000088899
AC Ex	ENSG00000154975
AC Ex	ENSG00000038358
AC Ex	ENSG00000023516
AC Ex	ENSG00000171604
AC Ex	ENSG00000184307
AC Ex	ENSG00000164190
AC Ex	ENSG00000087191
AC Ex	ENSG00000163947
AC Ex	ENSG00000175416
AC Ex	ENSG00000169499
AC Ex	ENSG00000105518
AC Ex	ENSG00000162188
AC Ex	ENSG00000131773
AC Ex	ENSG00000110107
AC Ex	ENSG00000155265
AC Ex	ENSG00000197444
AC Ex	ENSG00000183837
AC Ex	ENSG00000150961
AC Ex	ENSG00000103549
AC Ex	ENSG00000091157
AC Ex	ENSG00000196792
AC Ex	ENSG00000130770
AC Ex	ENSG00000142197
AC Ex	ENSG00000090975
AC Ex	ENSG00000164082
AC Ex	ENSG00000145349
AC Ex	ENSG00000152954
AC Ex	ENSG00000171680
AC Ex	ENSG00000180901
AC Ex	ENSG00000108395
AC Ex	ENSG00000103269
AC Ex	ENSG00000105063
AC Ex	ENSG00000132879
AC Ex	ENSG00000105401
AC Ex	ENSG00000198718
AC Ex	ENSG00000169231
AC Ex	ENSG00000140937
AC Ex	ENSG00000158470
AC Ex	ENSG00000135250
AC Ex	ENSG00000253729
AC Ex	ENSG00000118946
AC Ex	ENSG00000100412
AC Ex	ENSG00000102181
AC Ex	ENSG00000120784
AC Ex	ENSG00000166342
AC Ex	ENSG00000182621
AC Ex	ENSG00000124177
AC Ex	ENSG00000103647
AC Ex	ENSG00000103264
AC Ex	ENSG00000078328
AC Ex	ENSG00000134504
AC Ex	ENSG00000082458
AC Ex	ENSG00000100167
AC Ex	ENSG00000128045
AC Ex	ENSG00000197852
AC Ex	ENSG00000126012
AC Ex	ENSG00000135018
AC Ex	ENSG00000145934
AC Ex	ENSG00000224982
AC Ex	ENSG00000189410
AC Ex	ENSG00000166167
AC Ex	ENSG00000115677
AC Ex	ENSG00000065609
AC Ex	ENSG00000182329
AC Ex	ENSG00000077522
AC Ex	ENSG00000123570
AC Ex	ENSG00000108100
AC Ex	ENSG00000059758
AC Ex	ENSG00000161533
AC Ex	ENSG00000144290
AC Ex	ENSG00000114030
AC Ex	ENSG00000133816
AC Ex	ENSG00000178235
AC Ex	ENSG00000007516
AC Ex	ENSG00000171988
AC Ex	ENSG00000135919
AC Ex	ENSG00000173227
AC Ex	ENSG00000154096
AC Ex	ENSG00000169641
AC Ex	ENSG00000117154
AC Ex	ENSG00000126432
AC Ex	ENSG00000165102
AC Ex	ENSG00000166908
AC Ex	ENSG00000148843
AC Ex	ENSG00000169925
AC Ex	ENSG00000227057
AC Ex	ENSG00000113161
AC Ex	ENSG00000174871
AC Ex	ENSG00000197045
AC Ex	ENSG00000112245
AC Ex	ENSG00000047936
AC Ex	ENSG00000144331
AC Ex	ENSG00000120963
AC Ex	ENSG00000077254
AC Ex	ENSG00000086300
AC Ex	ENSG00000185989
AC Ex	ENSG00000142494
AC Ex	ENSG00000184640
AC Ex	ENSG00000136603
AC Ex	ENSG00000182472
AC Ex	ENSG00000164169
AC Ex	ENSG00000170382
AC Ex	ENSG00000132821
AC Ex	ENSG00000213920
AC Ex	ENSG00000146007
AC Ex	ENSG00000146072
AC Ex	ENSG00000166793
AC Ex	ENSG00000114107
AC Ex	ENSG00000155096
AC Ex	ENSG00000135070
AC Ex	ENSG00000213619
AC Ex	ENSG00000130844
AC Ex	ENSG00000085433
AC Ex	ENSG00000092201
AC Ex	ENSG00000002834
AC Ex	ENSG00000169926
AC Ex	ENSG00000241360
AC Ex	ENSG00000179010
AC Ex	ENSG00000169398
AC Ex	ENSG00000196872
AC Ex	ENSG00000083312
AC Ex	ENSG00000147642
AC Ex	ENSG00000065613
AC Ex	ENSG00000108852
AC Ex	ENSG00000173264
AC Ex	ENSG00000198883
AC Ex	ENSG00000104427
AC Ex	ENSG00000169217
AC Ex	ENSG00000053108
AC Ex	ENSG00000165943
AC Ex	ENSG00000172260
AC Ex	ENSG00000143669
AC Ex	ENSG00000099783
AC Ex	ENSG00000172375
AC Ex	ENSG00000182601
AC Ex	ENSG00000124762
AC Ex	ENSG00000197530
AC Ex	ENSG00000146233
AC Ex	ENSG00000112062
AC Ex	ENSG00000121274
AC Ex	ENSG00000117152
AC Ex	ENSG00000065534
AC Ex	ENSG00000183049
AC Ex	ENSG00000162231
AC Ex	ENSG00000197006
AC Ex	ENSG00000143393
AC Ex	ENSG00000158792
AC Ex	ENSG00000063245
AC Ex	ENSG00000110768
AC Ex	ENSG00000102385
AC Ex	ENSG00000060140
AC Ex	ENSG00000067829
AC Ex	ENSG00000198478
AC Ex	ENSG00000165379
AC Ex	ENSG00000062485
AC Ex	ENSG00000108312
AC Ex	ENSG00000109738
AC Ex	ENSG00000176049
AC Ex	ENSG00000135447
AC Ex	ENSG00000134917
AC Ex	ENSG00000165678
AC Ex	ENSG00000170606
AC Ex	ENSG00000141622
AC Ex	ENSG00000152332
AC Ex	ENSG00000108947
AC Ex	ENSG00000133878
AC Ex	ENSG00000070718
AC Ex	ENSG00000170500
AC Ex	ENSG00000167889
AC Ex	ENSG00000155256
AC Ex	ENSG00000154556
AC Ex	ENSG00000278311
AC Ex	ENSG00000139044
AC Ex	ENSG00000121067
AC Ex	ENSG00000136874
AC Ex	ENSG00000128268
AC Ex	ENSG00000143799
AC Ex	ENSG00000068912
AC Ex	ENSG00000100095
AC Ex	ENSG00000204316
AC Ex	ENSG00000103502
AC Ex	ENSG00000115461
AC Ex	ENSG00000247596
AC Ex	ENSG00000105520
AC Ex	ENSG00000119801
AC Ex	ENSG00000157368
AC Ex	ENSG00000115685
AC Ex	ENSG00000221946
AC Ex	ENSG00000136950
AC Ex	ENSG00000140326
AC Ex	ENSG00000169169
AC Ex	ENSG00000125686
AC Ex	ENSG00000132938
AC Ex	ENSG00000119326
AC Ex	ENSG00000160785
AC Ex	ENSG00000092978
AC Ex	ENSG00000153443
AC Ex	ENSG00000183775
AC Ex	ENSG00000204310
AC Ex	ENSG00000125447
AC Ex	ENSG00000121766
AC Ex	ENSG00000100626
AC Ex	ENSG00000160226
AC Ex	ENSG00000161013
AC Ex	ENSG00000149150
AC Ex	ENSG00000119772
AC Ex	ENSG00000101079
AC Ex	ENSG00000135299
AC Ex	ENSG00000106537
AC Ex	ENSG00000036672
AC Ex	ENSG00000155330
AC Ex	ENSG00000060709
AC Ex	ENSG00000101421
AC Ex	ENSG00000128266
AC Ex	ENSG00000104142
AC Ex	ENSG00000181751
AC Ex	ENSG00000116353
AC Ex	ENSG00000149547
AC Ex	ENSG00000164924
AC Ex	ENSG00000197969
AC Ex	ENSG00000048540
AC Ex	ENSG00000188674
AC Ex	ENSG00000158985
AC Ex	ENSG00000069535
AC Ex	ENSG00000197261
AC Ex	ENSG00000142871
AC Ex	ENSG00000123144
AC Ex	ENSG00000065150
AC Ex	ENSG00000196588
AC Ex	ENSG00000131370
AC Ex	ENSG00000164061
AC Ex	ENSG00000154781
AC Ex	ENSG00000135622
AC Ex	ENSG00000156140
AC Ex	ENSG00000068308
AC Ex	ENSG00000162981
AC Ex	ENSG00000135519
AC Ex	ENSG00000167967
AC Ex	ENSG00000166171
AC Ex	ENSG00000185900
AC Ex	ENSG00000127124
AC Ex	ENSG00000139726
AC Ex	ENSG00000116106
AC Ex	ENSG00000108953
AC Ex	ENSG00000139990
AC Ex	ENSG00000156735
AC Ex	ENSG00000173726
AC Ex	ENSG00000177030
AC Ex	ENSG00000146090
AC Ex	ENSG00000198586
AC Ex	ENSG00000025770
AC Ex	ENSG00000127578
AC Ex	ENSG00000106789
AC Ex	ENSG00000175137
AC Ex	ENSG00000160190
AC Ex	ENSG00000078403
AC Ex	ENSG00000108557
AC Ex	ENSG00000136535
AC Ex	ENSG00000136478
AC Ex	ENSG00000028203
AC Ex	ENSG00000152969
AC Ex	ENSG00000145198
AC Ex	ENSG00000114757
AC Ex	ENSG00000153820
AC Ex	ENSG00000169851
AC Ex	ENSG00000119318
AC Ex	ENSG00000213983
AC Ex	ENSG00000136999
AC Ex	ENSG00000151778
AC Ex	ENSG00000162852
AC Ex	ENSG00000065970
AC Ex	ENSG00000143398
AC Ex	ENSG00000130479
AC Ex	ENSG00000214717
AC Ex	ENSG00000180616
AC Ex	ENSG00000117868
AC Ex	ENSG00000106682
AC Ex	ENSG00000150401
AC Ex	ENSG00000095794
AC Ex	ENSG00000164112
AC Ex	ENSG00000133083
AC Ex	ENSG00000138190
AC Ex	ENSG00000173848
AC Ex	ENSG00000105376
AC Ex	ENSG00000151292
AC Ex	ENSG00000165995
AC Ex	ENSG00000179841
AC Ex	ENSG00000256061
AC Ex	ENSG00000079785
AC Ex	ENSG00000154162
AC Ex	ENSG00000099308
AC Ex	ENSG00000125740
AC Ex	ENSG00000149269
AC Ex	ENSG00000123395
AC Ex	ENSG00000105722
AC Ex	ENSG00000070159
AC Ex	ENSG00000100644
AC Ex	ENSG00000164970
AC Ex	ENSG00000072062
AC Ex	ENSG00000119782
AC Ex	ENSG00000123352
AC Ex	ENSG00000153310
AC Ex	ENSG00000127334
AC Ex	ENSG00000198216
AC Ex	ENSG00000182575
AC Ex	ENSG00000115234
AC Ex	ENSG00000131697
AC Ex	ENSG00000147676
AC Ex	ENSG00000196605
AC Ex	ENSG00000115641
AC Ex	ENSG00000020426
AC Ex	ENSG00000125744
AC Ex	ENSG00000188786
AC Ex	ENSG00000135127
AC Ex	ENSG00000182870
AC Ex	ENSG00000196353
AC Ex	ENSG00000069966
AC Ex	ENSG00000163050
AC Ex	ENSG00000164885
AC Ex	ENSG00000040199
AC Ex	ENSG00000143321
AC Ex	ENSG00000122733
AC Ex	ENSG00000118900
AC Ex	ENSG00000154518
AC Ex	ENSG00000117477
AC Ex	ENSG00000100804
AC Ex	ENSG00000134222
AC Ex	ENSG00000043143
AC Ex	ENSG00000196189
AC Ex	ENSG00000149403
AC Ex	ENSG00000072803
AC Ex	ENSG00000126698
AC Ex	ENSG00000154479
AC Ex	ENSG00000196937
AC Ex	ENSG00000060656
AC Ex	ENSG00000138207
AC Ex	ENSG00000091136
AC Ex	ENSG00000132153
AC Ex	ENSG00000131462
AC Ex	ENSG00000108352
AC Ex	ENSG00000204427
AC Ex	ENSG00000112242
AC Ex	ENSG00000151729
AC Ex	ENSG00000112218
AC Ex	ENSG00000110675
AC Ex	ENSG00000186260
AC Ex	ENSG00000165655
AC Ex	ENSG00000005001
AC Ex	ENSG00000134107
AC Ex	ENSG00000135052
AC Ex	ENSG00000057757
AC Ex	ENSG00000278195
AC Ex	ENSG00000122877
AC Ex	ENSG00000091137
AC Ex	ENSG00000104388
AC Ex	ENSG00000113312
AC Ex	ENSG00000080546
AC Ex	ENSG00000141759
AC Ex	ENSG00000165548
AC Ex	ENSG00000101463
AC Ex	ENSG00000138709
AC Ex	ENSG00000149532
AC Ex	ENSG00000174606
AC Ex	ENSG00000184647
AC Ex	ENSG00000183092
AC Ex	ENSG00000185774
AC Ex	ENSG00000156486
AC Ex	ENSG00000166068
AC Ex	ENSG00000179222
AC Ex	ENSG00000136003
AC Ex	ENSG00000163781
AC Ex	ENSG00000040608
AC Ex	ENSG00000106635
AC Ex	ENSG00000133265
AC Ex	ENSG00000152154
AC Ex	ENSG00000063438
AC Ex	ENSG00000052802
AC Ex	ENSG00000135631
AC Ex	ENSG00000075240
AC Ex	ENSG00000130733
AC Ex	ENSG00000102981
AC Ex	ENSG00000160716
AC Ex	ENSG00000074410
AC Ex	ENSG00000156097
AC Ex	ENSG00000137100
AC Ex	ENSG00000113013
AC Ex	ENSG00000181788
AC Ex	ENSG00000102225
AC Ex	ENSG00000111737
AC Ex	ENSG00000138801
AC Ex	ENSG00000152894
AC Ex	ENSG00000186111
AC Ex	ENSG00000164604
AC Ex	ENSG00000122482
AC Ex	ENSG00000153823
AC Ex	ENSG00000171533
AC Ex	ENSG00000153233
AC Ex	ENSG00000137817
AC Ex	ENSG00000136490
AC Ex	ENSG00000112658
AC Ex	ENSG00000183431
AC Ex	ENSG00000159753
AC Ex	ENSG00000184305
AC Ex	ENSG00000117139
AC Ex	ENSG00000172765
AC Ex	ENSG00000100744
AC Ex	ENSG00000124194
AC Ex	ENSG00000176697
AC Ex	ENSG00000103056
AC Ex	ENSG00000127585
AC Ex	ENSG00000134986
AC Ex	ENSG00000124203
AC Ex	ENSG00000169220
AC Ex	ENSG00000065559
AC Ex	ENSG00000099849
AC Ex	ENSG00000161298
AC Ex	ENSG00000146147
AC Ex	ENSG00000101350
AC Ex	ENSG00000215041
AC Ex	ENSG00000123612
AC Ex	ENSG00000164100
AC Ex	ENSG00000239382
AC Ex	ENSG00000165283
AC Ex	ENSG00000204463
AC Ex	ENSG00000135932
AC Ex	ENSG00000112759
AC Ex	ENSG00000133302
AC Ex	ENSG00000123240
AC Ex	ENSG00000080608
AC Ex	ENSG00000110148
AC Ex	ENSG00000182732
AC Ex	ENSG00000131149
AC Ex	ENSG00000075340
AC Ex	ENSG00000158480
AC Ex	ENSG00000187726
AC Ex	ENSG00000163462
AC Ex	ENSG00000175906
AC Ex	ENSG00000004866
AC Ex	ENSG00000152822
AC Ex	ENSG00000140403
AC Ex	ENSG00000110171
AC Ex	ENSG00000118160
AC Ex	ENSG00000134072
AC Ex	ENSG00000100246
AC Ex	ENSG00000114648
AC Ex	ENSG00000185340
AC Ex	ENSG00000198513
AC Ex	ENSG00000158748
AC Ex	ENSG00000153266
AC Ex	ENSG00000162373
AC Ex	ENSG00000172733
AC Ex	ENSG00000153558
AC Ex	ENSG00000174669
AC Ex	ENSG00000131381
AC Ex	ENSG00000007047
AC Ex	ENSG00000119508
AC Ex	ENSG00000238227
AC Ex	ENSG00000155090
AC Ex	ENSG00000118200
AC Ex	ENSG00000113805
AC Ex	ENSG00000005448
AC Ex	ENSG00000108924
AC Ex	ENSG00000188191
AC Ex	ENSG00000110328
AC Ex	ENSG00000102271
AC Ex	ENSG00000172602
AC Ex	ENSG00000102038
AC Ex	ENSG00000176390
AC Ex	ENSG00000124493
AC Ex	ENSG00000096063
AC Ex	ENSG00000111664
AC Ex	ENSG00000168502
AC Ex	ENSG00000186106
AC Ex	ENSG00000185000
AC Ex	ENSG00000103174
AC Ex	ENSG00000198517
AC Ex	ENSG00000113448
AC Ex	ENSG00000154822
AC Ex	ENSG00000111726
AC Ex	ENSG00000243943
AC Ex	ENSG00000091622
AC Ex	ENSG00000049759
AC Ex	ENSG00000008118
AC Ex	ENSG00000136842
AC Ex	ENSG00000053372
AC Ex	ENSG00000165914
AC Ex	ENSG00000164056
AC Ex	ENSG00000122641
AC Ex	ENSG00000029639
AC Ex	ENSG00000108551
AC Ex	ENSG00000173653
AC Ex	ENSG00000118733
AC Ex	ENSG00000180357
AC Ex	ENSG00000159674
AC Ex	ENSG00000178531
AC Ex	ENSG00000089091
AC Ex	ENSG00000101384
AC Ex	ENSG00000161395
AC Ex	ENSG00000100345
AC Ex	ENSG00000136870
AC Ex	ENSG00000099326
AC Ex	ENSG00000130638
AC Ex	ENSG00000162241
AC Ex	ENSG00000112290
AC Ex	ENSG00000165186
AC Ex	ENSG00000206418
AC Ex	ENSG00000175606
AC Ex	ENSG00000117069
AC Ex	ENSG00000116544
AC Ex	ENSG00000111249
AC Ex	ENSG00000101146
AC Ex	ENSG00000136267
AC Ex	ENSG00000169035
AC Ex	ENSG00000103316
AC Ex	ENSG00000175274
AC Ex	ENSG00000166206
AC Ex	ENSG00000186479
AC Ex	ENSG00000134871
AC Ex	ENSG00000146426
AC Ex	ENSG00000175711
AC Ex	ENSG00000171992
AC Ex	ENSG00000151079
AC Ex	ENSG00000013306
AC Ex	ENSG00000100311
AC Ex	ENSG00000278535
AC Ex	ENSG00000081803
AC Ex	ENSG00000164794
AC Ex	ENSG00000109047
AC Ex	ENSG00000113100
AC Ex	ENSG00000188677
AC Ex	ENSG00000147202
AC Ex	ENSG00000273841
AC Ex	ENSG00000092051
AC Ex	ENSG00000091664
AC Ex	ENSG00000178974
AC Ex	ENSG00000184672
AC Ex	ENSG00000177707
AC Ex	ENSG00000155438
AC Ex	ENSG00000120265
AC Ex	ENSG00000116604
AC Ex	ENSG00000138172
AC Ex	ENSG00000151468
AC Ex	ENSG00000120049
AC Ex	ENSG00000174791
AC Ex	ENSG00000183036
AC Ex	ENSG00000198046
AC Ex	ENSG00000123064
AC Ex	ENSG00000111218
AC Ex	ENSG00000154240
AC Ex	ENSG00000106477
AC Ex	ENSG00000176601
AC Ex	ENSG00000135048
AC Ex	ENSG00000169946
AC Ex	ENSG00000151490
AC Ex	ENSG00000164270
AC Ex	ENSG00000065325
AC Ex	ENSG00000036448
AC Ex	ENSG00000184613
AC Ex	ENSG00000144119
AC Ex	ENSG00000182379
AC Ex	ENSG00000152402
AC Ex	ENSG00000135439
AC Ex	ENSG00000070729
AC Ex	ENSG00000138311
AC Ex	ENSG00000187135
AC Ex	ENSG00000173452
AC Ex	ENSG00000111885
AC Ex	ENSG00000171243
AC Ex	ENSG00000138640
AC Ex	ENSG00000068383
AC Ex	ENSG00000125869
AC Ex	ENSG00000162621
AC Ex	ENSG00000070915
AC Ex	ENSG00000117643
AC Ex	ENSG00000026559
AC Ex	ENSG00000117036
AC Ex	ENSG00000144771
AC Ex	ENSG00000130477
AC Ex	ENSG00000259431
AC Ex	ENSG00000079931
AC Ex	ENSG00000176204
AC Ex	ENSG00000122574
AC Ex	ENSG00000072201
AC Ex	ENSG00000196557
AC Ex	ENSG00000185352
AC Ex	ENSG00000145451
AC Ex	ENSG00000095203
AC Ex	ENSG00000188352
AC Ex	ENSG00000143882
AC Ex	ENSG00000104361
AC Ex	ENSG00000141753
AC Ast	ENSG00000164199
AC Ast	ENSG00000110436
AC Ast	ENSG00000152661
AC Ast	ENSG00000131095
AC Ast	ENSG00000198417
AC Ast	ENSG00000080573
AC Ast	ENSG00000068078
AC Ast	ENSG00000171885
AC Ast	ENSG00000079215
AC Ast	ENSG00000170370
AC Ast	ENSG00000113721
AC Ast	ENSG00000100427
AC Ast	ENSG00000135744
AC Ast	ENSG00000165795
AC Ast	ENSG00000196091
AC Ast	ENSG00000144040
AC Ast	ENSG00000154930
AC Ast	ENSG00000124440
AC Ast	ENSG00000134769
AC Ast	ENSG00000087250
AC Ast	ENSG00000160678
AC Ast	ENSG00000151012
AC Ast	ENSG00000141469
AC Ast	ENSG00000124942
AC Ast	ENSG00000101439
AC Ast	ENSG00000130203
AC Ast	ENSG00000109846
AC Ast	ENSG00000181722
AC Ast	ENSG00000155324
AC Ast	ENSG00000161509
AC Ast	ENSG00000182902
AC Ast	ENSG00000132470
AC Ast	ENSG00000124145
AC Ast	ENSG00000072952
AC Ast	ENSG00000182667
AC Ast	ENSG00000092820
AC Ast	ENSG00000168710
AC Ast	ENSG00000105854
AC Ast	ENSG00000140545
AC Ast	ENSG00000164050
AC Ast	ENSG00000164089
AC Ast	ENSG00000167772
AC Ast	ENSG00000189171
AC Ast	ENSG00000153944
AC Ast	ENSG00000168309
AC Ast	ENSG00000155368
AC Ast	ENSG00000135063
AC Ast	ENSG00000185432
AC Ast	ENSG00000105894
AC Ast	ENSG00000116641
AC Ast	ENSG00000153902
AC Ast	ENSG00000144908
AC Ast	ENSG00000079337
AC Ast	ENSG00000145555
AC Ast	ENSG00000127603
AC Ast	ENSG00000111783
AC Ast	ENSG00000167996
AC Ast	ENSG00000111907
AC Ast	ENSG00000184232
AC Ast	ENSG00000148204
AC Ast	ENSG00000114790
AC Ast	ENSG00000170075
AC Ast	ENSG00000121742
AC Ast	ENSG00000163346
AC Ast	ENSG00000129244
AC Ast	ENSG00000084636
AC Ast	ENSG00000172037
AC Ast	ENSG00000120885
AC Ast	ENSG00000154134
AC Ast	ENSG00000132681
AC Ast	ENSG00000007372
AC Ast	ENSG00000132613
AC Ast	ENSG00000135424
AC Ast	ENSG00000144749
AC Ast	ENSG00000182272
AC Ast	ENSG00000101400
AC Ast	ENSG00000162390
AC Ast	ENSG00000148053
AC Ast	ENSG00000169020
AC Ast	ENSG00000196683
AC Ast	ENSG00000139155
AC Ast	ENSG00000176046
AC Ast	ENSG00000100767
AC Ast	ENSG00000142611
AC Ast	ENSG00000232112
AC Ast	ENSG00000102362
AC Ast	ENSG00000147588
AC Ast	ENSG00000162599
AC Ast	ENSG00000188647
AC Ast	ENSG00000046889
AC Ast	ENSG00000026025
AC Ast	ENSG00000164292
AC Ast	ENSG00000148655
AC Ast	ENSG00000128585
AC Ast	ENSG00000159176
AC Ast	ENSG00000141756
AC Ast	ENSG00000198838
AC Ast	ENSG00000211448
AC Ast	ENSG00000148482
AC Ast	ENSG00000103740
AC Ast	ENSG00000132530
AC Ast	ENSG00000087266
AC Ast	ENSG00000010810
AC Ast	ENSG00000167191
AC Ast	ENSG00000076555
AC Ast	ENSG00000101680
AC Ast	ENSG00000138696
AC Ast	ENSG00000130876
AC Ast	ENSG00000183963
AC Ast	ENSG00000107249
AC Ast	ENSG00000147509
AC Ast	ENSG00000153208
AC Ast	ENSG00000151929
AC Ast	ENSG00000185650
AC Ast	ENSG00000221932
AC Ast	ENSG00000143977
AC Ast	ENSG00000119927
AC Ast	ENSG00000152518
AC Ast	ENSG00000109113
AC Ast	ENSG00000130055
AC Ast	ENSG00000143514
AC Ast	ENSG00000136160
AC Ast	ENSG00000012171
AC Ast	ENSG00000170989
AC Ast	ENSG00000132692
AC Ast	ENSG00000106211
AC Ast	ENSG00000134569
AC Ast	ENSG00000106571
AC Ast	ENSG00000089472
AC Ast	ENSG00000113594
AC Ast	ENSG00000107738
AC Ast	ENSG00000148411
AC Ast	ENSG00000106003
AC Ast	ENSG00000143819
AC Ast	ENSG00000089012
AC Ast	ENSG00000126785
AC Ast	ENSG00000153446
AC Ast	ENSG00000172458
AC Ast	ENSG00000148604
AC Ast	ENSG00000134508
AC Ast	ENSG00000117450
AC Ast	ENSG00000141736
AC Ast	ENSG00000129151
AC Ast	ENSG00000121310
AC Ast	ENSG00000134873
AC Ast	ENSG00000174628
AC Ast	ENSG00000165449
AC Ast	ENSG00000178685
AC Ast	ENSG00000074047
AC Ast	ENSG00000054179
AC Ast	ENSG00000159423
AC Ast	ENSG00000113916
AC Ast	ENSG00000117318
AC Ast	ENSG00000099840
AC Ast	ENSG00000182103
AC Ast	ENSG00000071082
AC Ast	ENSG00000163406
AC Ast	ENSG00000169006
AC Ast	ENSG00000103335
AC Ast	ENSG00000173821
AC Ast	ENSG00000132481
AC Ast	ENSG00000205336
AC Ast	ENSG00000148180
AC Ast	ENSG00000167107
AC Ast	ENSG00000183579
AC Ast	ENSG00000135094
AC Ast	ENSG00000127249
AC Ast	ENSG00000109062
AC Ast	ENSG00000101198
AC Ast	ENSG00000187079
AC Ast	ENSG00000178252
AC Ast	ENSG00000179399
AC Ast	ENSG00000114698
AC Ast	ENSG00000072310
AC Ast	ENSG00000165458
AC Ast	ENSG00000181449
AC Ast	ENSG00000100968
AC Ast	ENSG00000140022
AC Ast	ENSG00000129116
AC Ast	ENSG00000262655
AC Ast	ENSG00000182175
AC Ast	ENSG00000167676
AC Ast	ENSG00000167701
AC Ast	ENSG00000072778
AC Ast	ENSG00000152583
AC Ast	ENSG00000138685
AC Ast	ENSG00000056487
AC Ast	ENSG00000134324
AC Ast	ENSG00000074855
AC Ast	ENSG00000117592
AC Ast	ENSG00000136869
AC Ast	ENSG00000068976
AC Ast	ENSG00000145794
AC Ast	ENSG00000160213
AC Ast	ENSG00000169860
AC Ast	ENSG00000109472
AC Ast	ENSG00000056736
AC Ast	ENSG00000135926
AC Ast	ENSG00000110090
AC Ast	ENSG00000134042
AC Ast	ENSG00000184371
AC Ast	ENSG00000170915
AC Ast	ENSG00000164976
AC Ast	ENSG00000100979
AC Ast	ENSG00000152767
AC Ast	ENSG00000123933
AC Ast	ENSG00000078246
AC Ast	ENSG00000104728
AC Ast	ENSG00000148175
AC Ast	ENSG00000264522
AC Ast	ENSG00000114315
AC Ast	ENSG00000186815
AC Ast	ENSG00000088826
AC Ast	ENSG00000110721
AC Ast	ENSG00000163110
AC Ast	ENSG00000166123
AC Ast	ENSG00000256463
AC Ast	ENSG00000104447
AC Ast	ENSG00000180263
AC Ast	ENSG00000130304
AC Ast	ENSG00000183762
AC Ast	ENSG00000149633
AC Ast	ENSG00000151322
AC Ast	ENSG00000157833
AC Ast	ENSG00000166682
AC Ast	ENSG00000120278
AC Ast	ENSG00000143416
AC Ast	ENSG00000137693
AC Ast	ENSG00000164106
AC Ast	ENSG00000008311
AC Ast	ENSG00000178075
AC Ast	ENSG00000174705
AC Ast	ENSG00000158966
AC Ast	ENSG00000111666
AC Ast	ENSG00000111961
AC Ast	ENSG00000148400
AC Ast	ENSG00000119280
AC Ast	ENSG00000123636
AC Ast	ENSG00000111275
AC Ast	ENSG00000138495
AC Ast	ENSG00000165507
AC Ast	ENSG00000092621
AC Ast	ENSG00000198363
AC Ast	ENSG00000240583
AC Ast	ENSG00000124181
AC Ast	ENSG00000066468
AC Ast	ENSG00000073712
AC Ast	ENSG00000138326
AC Ast	ENSG00000101144
AC Ast	ENSG00000105552
AC Ast	ENSG00000169871
AC Ast	ENSG00000067057
AC Ast	ENSG00000131981
AC Ast	ENSG00000071967
AC Ast	ENSG00000103995
AC Ast	ENSG00000148737
AC Ast	ENSG00000156411
AC Ast	ENSG00000135540
AC Ast	ENSG00000187091
AC Ast	ENSG00000146122
AC Ast	ENSG00000174306
AC Ast	ENSG00000154723
AC Ast	ENSG00000166033
AC Ast	ENSG00000134824
AC Ast	ENSG00000154310
AC Ast	ENSG00000138496
AC Ast	ENSG00000152580
AC Ast	ENSG00000115380
AC Ast	ENSG00000103710
AC Ast	ENSG00000172493
AC Ast	ENSG00000148700
AC Ast	ENSG00000134250
AC Ast	ENSG00000179902
AC Ast	ENSG00000177600
AC Ast	ENSG00000162944
AC Ast	ENSG00000151914
AC Ast	ENSG00000107551
AC Ast	ENSG00000112715
AC Ast	ENSG00000136205
AC Ast	ENSG00000064961
AC Ast	ENSG00000105519
AC Ast	ENSG00000130653
AC Ast	ENSG00000099204
AC Ast	ENSG00000188338
AC Ast	ENSG00000163430
AC Ast	ENSG00000171903
AC Ast	ENSG00000140836
AC Ast	ENSG00000165029
AC Ast	ENSG00000102032
AC Ast	ENSG00000164066
AC Ast	ENSG00000135069
AC Ast	ENSG00000106278
AC Ast	ENSG00000103811
AC Ast	ENSG00000172461
AC Ast	ENSG00000185033
AC Ast	ENSG00000197977
AC Ast	ENSG00000080493
AC Ast	ENSG00000154217
AC Ast	ENSG00000156049
AC Ast	ENSG00000184985
AC Ast	ENSG00000130413
AC Ast	ENSG00000185043
AC Ast	ENSG00000168209
AC Ast	ENSG00000152284
AC Ast	ENSG00000164919
AC Ast	ENSG00000143545
AC Ast	ENSG00000127418
AC Ast	ENSG00000120896
AC Ast	ENSG00000100842
AC Ast	ENSG00000203667
AC Ast	ENSG00000077942
AC Ast	ENSG00000205517
AC Ast	ENSG00000145832
AC Ast	ENSG00000149090
AC Ast	ENSG00000102125
AC Ast	ENSG00000166340
AC Ast	ENSG00000010282
AC Ast	ENSG00000125124
AC Ast	ENSG00000150907
AC Ast	ENSG00000162733
AC Ast	ENSG00000091656
AC Ast	ENSG00000064655
AC Ast	ENSG00000186998
AC Ast	ENSG00000134716
AC Ast	ENSG00000165801
AC Ast	ENSG00000163285
AC Ast	ENSG00000189350
AC Ast	ENSG00000108231
AC Ast	ENSG00000135838
AC Ast	ENSG00000143919
AC Ast	ENSG00000007384
AC Ast	ENSG00000004799
AC Ast	ENSG00000135912
AC Ast	ENSG00000124782
AC Ast	ENSG00000140522
AC Ast	ENSG00000164877
AC Ast	ENSG00000082781
AC Ast	ENSG00000169733
AC Ast	ENSG00000069667
AC Ast	ENSG00000186350
AC Ast	ENSG00000137509
AC Ast	ENSG00000147853
AC Ast	ENSG00000131771
AC Ast	ENSG00000130762
AC Ast	ENSG00000143878
AC Ast	ENSG00000149782
AC Ast	ENSG00000104518
AC Ast	ENSG00000111058
AC Ast	ENSG00000167601
AC Ast	ENSG00000168874
AC Ast	ENSG00000181019
AC Ast	ENSG00000116132
AC Ast	ENSG00000177426
AC Ast	ENSG00000128311
AC Ast	ENSG00000166839
AC Ast	ENSG00000168003
AC Ast	ENSG00000041982
AC Ast	ENSG00000087903
AC Ast	ENSG00000118263
AC Ast	ENSG00000146005
AC Ast	ENSG00000154553
AC Ast	ENSG00000179094
AC Ast	ENSG00000071054
AC Ast	ENSG00000168077
AC Ast	ENSG00000101004
AC Ast	ENSG00000091409
AC Ast	ENSG00000198963
AC Ast	ENSG00000186951
AC Ast	ENSG00000261609
AC Ast	ENSG00000177303
AC Ast	ENSG00000108604
AC Ast	ENSG00000167470
AC Ast	ENSG00000134376
AC Ast	ENSG00000077782
AC Ast	ENSG00000187266
AC Ast	ENSG00000123096
AC Ast	ENSG00000078114
AC Ast	ENSG00000117115
AC Ast	ENSG00000119632
AC Ast	ENSG00000179761
AC Ast	ENSG00000164530
AC Ast	ENSG00000123836
AC Ast	ENSG00000129219
AC Ast	ENSG00000016391
AC Ast	ENSG00000134548
AC Ast	ENSG00000138639
AC Ast	ENSG00000244754
AC Ast	ENSG00000182326
AC Ast	ENSG00000149922
AC Ast	ENSG00000166689
AC Ast	ENSG00000187244
AC Ast	ENSG00000198948
AC Ast	ENSG00000255690
AC Ast	ENSG00000140067
AC Ast	ENSG00000142669
AC Ast	ENSG00000143603
AC Ast	ENSG00000119139
AC Ast	ENSG00000138080
AC Ast	ENSG00000130158
AC Ast	ENSG00000221963
AC Ast	ENSG00000131196
AC Ast	ENSG00000099875
AC Ast	ENSG00000155366
AC Ast	ENSG00000099864
AC Ast	ENSG00000198753
AC Ast	ENSG00000018408
AC Ast	ENSG00000173548
AC Ast	ENSG00000056972
AC Ast	ENSG00000213853
AC Ast	ENSG00000140511
AC Ast	ENSG00000271447
AC Ast	ENSG00000123104
AC Ast	ENSG00000085982
AC Ast	ENSG00000184925
AC Ast	ENSG00000125826
AC Ast	ENSG00000135919
AC Ast	ENSG00000123908
AC Ast	ENSG00000150760
AC Ast	ENSG00000243317
AC Ast	ENSG00000101493
AC Ast	ENSG00000169764
AC Ast	ENSG00000177943
AC Ast	ENSG00000182263
AC Ast	ENSG00000173905
AC Ast	ENSG00000124126
AC Ast	ENSG00000065518
AC Ast	ENSG00000197568
AC Ast	ENSG00000117519
AC Ast	ENSG00000167216
AC Ast	ENSG00000198003
AC Ast	ENSG00000160712
AC Ast	ENSG00000182087
AC Ast	ENSG00000146648
AC Ast	ENSG00000162413
AC Ast	ENSG00000134138
AC Ast	ENSG00000170271
AC Ast	ENSG00000167543
AC Ast	ENSG00000228474
AC Ast	ENSG00000130702
AC Ast	ENSG00000108773
AC Ast	ENSG00000143994
AC Ast	ENSG00000099954
AC Ast	ENSG00000015133
AC Ast	ENSG00000187239
AC Ast	ENSG00000188643
AC Ast	ENSG00000135899
AC Ast	ENSG00000051128
AC Ast	ENSG00000101849
AC Ast	ENSG00000069431
AC Ast	ENSG00000138756
AC Ast	ENSG00000168913
AC Ast	ENSG00000138771
AC Ast	ENSG00000196358
AC Ast	ENSG00000163884
AC Ast	ENSG00000135097
AC Ast	ENSG00000178719
AC Ast	ENSG00000178764
AC Ast	ENSG00000104870
AC Ast	ENSG00000138413
AC Ast	ENSG00000144857
AC Ast	ENSG00000185187
AC Ast	ENSG00000067182
AC Ast	ENSG00000151023
AC Ast	ENSG00000005206
AC Ast	ENSG00000164344
AC Ast	ENSG00000196187
AC Ast	ENSG00000031081
AC Ast	ENSG00000183255
AC Ast	ENSG00000136802
AC Ast	ENSG00000144476
AC Ast	ENSG00000204682
AC Ast	ENSG00000178209
AC Ast	ENSG00000164125
AC Ast	ENSG00000160285
AC Ast	ENSG00000156076
AC Ast	ENSG00000185946
AC Ast	ENSG00000111077
AC Ast	ENSG00000176165
AC Ast	ENSG00000213625
AC Ast	ENSG00000196935
AC Ast	ENSG00000170310
AC Ast	ENSG00000119938
AC Ast	ENSG00000135318
AC Ast	ENSG00000241343
AC Ast	ENSG00000213445
AC Ast	ENSG00000139132
AC Ast	ENSG00000178104
AC Ast	ENSG00000198719
AC Ast	ENSG00000196586
AC Ast	ENSG00000180537
AC Ast	ENSG00000105185
AC Ast	ENSG00000005379
AC Ast	ENSG00000171444
AC Ast	ENSG00000183091
AC Ast	ENSG00000168899
AC Ast	ENSG00000213918
AC Ast	ENSG00000186635
AC Ast	ENSG00000134909
AC Ast	ENSG00000115526
AC Ast	ENSG00000157110
AC Ast	ENSG00000132164
AC Ast	ENSG00000120915
AC Ast	ENSG00000111405
AC Ast	ENSG00000135245
AC Ast	ENSG00000131941
AC Ast	ENSG00000185942
AC Ast	ENSG00000183778
AC Ast	ENSG00000213722
AC Ast	ENSG00000127922
AC Ast	ENSG00000054523
AC Ast	ENSG00000182218
AC Ast	ENSG00000143622
AC Ast	ENSG00000030419
AC Ast	ENSG00000183066
AC Ast	ENSG00000133048
AC Ast	ENSG00000108370
AC Ast	ENSG00000076604
AC Ast	ENSG00000091986
AC Ast	ENSG00000171729
AC Ast	ENSG00000137936
AC Ast	ENSG00000143384
AC Ast	ENSG00000185386
AC Ast	ENSG00000165185
AC Ast	ENSG00000184384
AC Ast	ENSG00000065000
AC Ast	ENSG00000100711
AC Ast	ENSG00000092929
AC Ast	ENSG00000175662
AC Ast	ENSG00000131044
AC Ast	ENSG00000135414
AC Ast	ENSG00000165730
AC Ast	ENSG00000147459
AC Ast	ENSG00000160781
AC Ast	ENSG00000056558
AC Ast	ENSG00000164241
AC Ast	ENSG00000176438
AC Ast	ENSG00000135315
AC Ast	ENSG00000103197
AC Ast	ENSG00000102908
AC Ast	ENSG00000158106
AC Ast	ENSG00000087274
AC Ast	ENSG00000184949
[truncated: 8,182 more rows]
