# Supplementary material for: Single-cell-resolution transcriptome map of human, chimpanzee, bonobo, and macaque brains
Source: HighWire-hosted journal article supplement (doi:10.1101/gr.256958.119), 2020-05-01
Supplement: Supplemental_Table_S6.xlsx [file Supplemental_Table_S6.xlsx]

## Sheet: HARs-enhancers
Table S6. Human accelerated regions (HARs) and human-specific genes.
genehancer_id	connected_genes
GH11J131590	NTM
GH07J027942	TAX1BP1
GH02J011398	ROCK2
GH19J042172	POU2F2
GH19J042172	MEGF8
GH03J004728	ITPR1
GH03J004729	ITPR1
GH01J044628	RNF220
GH10J024713	ARHGAP21
GH10J024727	ARHGAP21
GH02J235864	AGAP1
GH15J037044	MEIS2
GH01J204261	PLEKHA6
GH01J061172	NFIA
GH01J204265	PLEKHA6
GH13J067035	PCDH9
GH02J212109	ERBB4
GH02J161416	TBR1
GH08J018717	PSD3
GH05J038640	LIFR
GH02J161423	TBR1
GH19J042169	POU2F2
GH19J042176	MEGF8
GH19J042176	RPS19
GH19J042176	POU2F2
GH11J132943	OPCML
GH03J004744	ITPR1
GH14J033793	NPAS3
GH14J033707	NPAS3
GH14J033791	NPAS3
GH11J118906	DDX6
GH05J038643	LIFR
GH05J094693	SLF1
GH03J120637	NDUFB4
GH08J099869	COX6C
GH04J101190	PPP3CA
GH01J237042	MTR
GH02J161419	TBR1
GH03J050788	DOCK3
GH02J011394	ROCK2
GH12J024226	SOX5
GH02J161417	TBR1
GH12J089345	DUSP6
GH01J061178	NFIA
GH03J004732	ITPR1
GH0XJ018424	CDKL5
GH02J039606	TMEM178A
GH14J033026	NPAS3
GH19J038057	ZNF793
GH19J038057	ZFP30
GH19J038057	SIPA1L3
GH19J038057	SPINT2
GH19J038057	PPP1R14A
GH11J131651	NTM
GH10J024715	ARHGAP21
GH05J159204	RNF145
GH03J004734	ITPR1
GH11J131599	NTM
GH01J204258	PLEKHA6
GH02J011391	ROCK2
GH02J011400	ROCK2
GH19J042173	POU2F2
GH19J042173	MEGF8
GH14J033711	NPAS3
GH05J038639	LIFR
GH01J044637	RNF220
GH11J131593	NTM
GH02J219397	ASIC4
GH05J094690	SLF1
GH01J061179	NFIA
GH05J093076	NR2F1
GH03J004746	ITPR1
GH03J186239	ETV5
GH11J131981	NTM
GH14J032724	NPAS3
GH01J061170	NFIA
GH03J186237	ETV5
GH02J189440	ORMDL1
GH12J024015	SOX5
GH10J118045	RAB11FIP2
GH11J131598	NTM
GH03J004748	ITPR1
GH11J114142	ZBTB16
GH19J042170	POU2F2
GH19J042170	MEGF8
GH05J038642	LIFR
GH12J024229	SOX5
GH01J204253	PLEKHA6
GH10J024717	ARHGAP21
GH02J144502	ZEB2
GH03J120641	NDUFB4
GH08J099872	COX6C
GH01J044635	RNF220
GH03J108005	CD47
GH01J204269	PLEKHA6
GH02J011384	ROCK2
GH17J068204	HELZ
GH11J131594	NTM
GH02J235867	AGAP1
GH15J036882	MEIS2
GH06J035594	RPL10A
GH05J088822	MEF2C
GH11J131601	NTM
GH11J114143	ZBTB16
GH03J107597	BBX
GH14J033792	NPAS3
GH02J011393	ROCK2

## Sheet: TFs
TFs	P adjust	Number of HARs-enhancers overlaps	Is human-specific?
ADNP	0.129246	6	No
AEBP2	0.355265	1	No
AHR	0.129246	6	No
ARID2	0.355539	4	No
ARID3A	0.199037	1	No
ARID4B	0.0609335	16	No
ARNT	0.0865801	10	No
ATF1	0.0151497	18	No
ATF2	0.0207	21	No
ATF3	0.00806211	15	No
ATF7	0.0788427	21	No
BACH1	0.256361	11	No
BATF	0.360983	7	No
BCL11A	0.105269	11	Yes
BCL11B	0.00806211	8	Yes
BCL6	0.0617662	13	No
BCL6B	0.167541	4	No
BCLAF1	0.201322	8	No
BCOR	0.112904	11	No
BHLHE40	0	17	No
BMI1	0	12	No
BRCA1	0.379824	3	No
BRD4	0.0125901	8	No
CAVIN1	0.659879	1	No
CBFA2T2	0.097086	10	No
CBFA2T3	0.328596	10	No
CBFB	0.29735	6	No
CBLL2	0.620065	1	No
CBX1	0.287541	5	No
CBX5	0.357819	2	Yes
CC2D1A	0.360983	7	Yes
CDC5L	0.388931	2	No
CEBPA	0.0207	17	No
CEBPB	0.0284986	24	No
CEBPG	0.0125901	23	No
CHAMP1	0.356084	4	No
CHD1	0.717652	2	No
CHD2	0.0151497	11	No
CREB1	0.32205	13	No
CREM	0.0125901	25	No
CSDE1	0	8	No
CTBP1	0.0730551	20	No
CTCF	0.188606	20	No
CUX1	0.124497	8	Yes
DACH1	0.494637	4	No
DDX20	0.559765	1	No
DEAF1	0.65456	1	No
DEK	0.0617662	6	No
DIDO1	0.351342	3	No
DMAP1	0.0525189	11	No
DNMT3B	0.283405	4	No
DPF2	0.174255	21	No
DRAP1	0.167541	9	Yes
E2F1	0.188606	4	No
E2F5	0.0609335	8	No
E2F8	0.425668	1	No
E4F1	0.513988	1	Yes
EBF1	0.331754	9	No
EED	0.224132	9	No
EGR1	0.0185673	18	Yes
EGR2	0	20	No
EHMT2	0.312188	5	No
ELF1	0.0284986	19	No
ELF3	0.0207	16	No
ELF4	0.494637	2	No
ELK1	0.0746462	6	No
EMSY	0.226968	11	No
EP300	0.0989145	14	No
ERF	0.129523	11	No
ESRRA	0.722567	2	No
ETS1	0.308476	4	No
ETV4	0.0989145	9	No
ETV5	0.0465011	13	Yes
ETV6	0.120043	9	No
EZH2	0	14	No
FEZF1	0	17	No
FOS	0.312587	15	Yes
FOSL1	0.388931	10	No
FOSL2	0.127146	11	No
FOXA1	0.0465011	14	No
FOXA2	0.0125901	20	No
FOXA3	0.0207	18	No
FOXK2	0.0632172	13	No
FOXM1	0.0417764	5	No
FOXP1	0.0483727	11	Yes
GABPA	0.0125901	19	No
GABPB1	0.00806211	16	No
GATA3	0.0284986	13	No
GATAD1	0.0465011	11	No
GATAD2A	0.0125901	21	No
GATAD2B	0.167253	8	No
GFI1B	0	9	No
GLI4	0.308892	3	No
GLIS1	0.00806211	20	No
GLIS2	0.0284986	13	No
GMEB1	0.175209	9	No
GMEB2	0.795205	1	No
GTF2A2	0.424452	2	No
GTF2E2	0.168551	5	No
GTF2F1	0.166217	9	No
HCFC1	0.0781219	8	No
HDAC1	0.0694098	16	No
HDAC2	0.0335431	15	No
HDGF	0.388573	9	No
HES1	0.199037	2	Yes
HHEX	0.0207	6	No
HIC1	0.0746462	10	No
HLF	0.0237693	16	No
HLTF	0.340673	4	No
HMG20A	0.0989145	9	No
HMG20B	0.0284986	9	No
HNF1A	0.00806211	11	No
HNF4A	0.0456686	20	No
HNF4G	0.211875	6	No
HOMEZ	0.102576	10	No
HSF1	0.117781	3	No
IKZF1	0.0310967	28	No
IKZF2	0.129523	14	No
IKZF5	0.0185673	15	No
INSM2	0.153731	7	No
IRF2	0.121423	12	No
IRF3	0.25756	3	No
IRF4	0.522402	5	No
IRF5	0.503306	1	No
IRF9	0.590838	2	No
JUN	0.0781219	14	No
JUNB	0.449428	6	Yes
JUND	0.0958283	22	No
KAT7	0	11	No
KAT8	0.0207	15	No
KDM1A	0.0151497	23	No
KDM3A	0.0617662	9	No
KDM5A	0.722567	1	No
KDM6A	0.0125901	9	No
KHSRP	0.712136	1	No
KLF1	0.0865801	13	No
KLF10	0	14	No
KLF11	0.260857	5	No
KLF13	0.156474	5	No
KLF14	0.673447	3	No
KLF16	0.00806211	20	No
KLF17	0.122792	10	No
KLF4	0.239459	3	No
KLF6	0.0567971	9	Yes
KLF7	0.133302	6	No
KLF8	0.00806211	15	Yes
KLF9	0.0151497	14	No
KMT2B	0.0270318	11	No
L3MBTL2	0.0151497	19	No
LARP7	0.182909	9	No
LCORL	0.575222	2	No
LEF1	0.0185673	12	No
MAFF	0.494637	4	No
MAFG	0.404257	7	No
MAFK	0.0590471	16	No
MAX	0	27	No
MAZ	0.0989145	10	No
MBD1	0.251033	7	No
MBD2	0.388393	5	No
MCM5	0.114392	1	No
MEF2D	0.0865801	7	No
MGA	0.0151497	13	No
MIER2	0.071063	8	No
MIER3	0.167541	8	No
MITF	0.0417764	6	No
MIXL1	0.268178	8	No
MLLT1	0.0788427	16	No
MLX	0.0125901	10	No
MNT	0.0207	22	No
MTA1	0.106357	10	No
MTA2	0.295141	8	No
MTA3	0.0677218	12	No
MXD3	0.0504698	9	No
MXD4	0.0439051	10	Yes
MXI1	0	15	Yes
MYC	0.111404	11	No
MYNN	0.03726	10	No
MYRF	0.309718	3	No
MZF1	0.0125901	10	No
NANOG	0.0632172	5	No
NBN	0.424366	11	No
NCOA1	0.106357	7	No
NCOA3	0.256361	3	No
NCOA6	0.174255	3	No
NCOR1	0.071063	12	No
NELFE	0.174255	1	No
NFATC1	0.141663	6	No
NFATC3	0.522402	2	No
NFE2	0.166217	11	No
NFE2L2	0.211101	5	No
NFIA	0.388212	7	Yes
NFIB	0.0125901	11	No
NFIC	0.119632	12	No
NFIL3	0.0151497	16	No
NFKBIZ	0.0465011	8	No
NFRKB	0.0456686	9	No
NFXL1	0.493785	2	No
NFYA	0.28024	3	No
NFYB	0.146372	4	No
NFYC	0.0617662	8	No
NKRF	0.182909	9	No
NONO	0.269293	2	No
NR2C1	0.174255	6	Yes
NR2C2	0.0284986	14	No
NR2F1	0.118715	14	Yes
NR2F2	0.0237693	15	No
NR2F6	0.0456686	15	No
NRF1	0	18	No
NUFIP1	0.287541	2	No
OSR2	0.00806211	16	No
OVOL3	0.0989145	5	No
PAF1	0.658261	1	No
PATZ1	0.0125901	16	No
PAX8	0.687782	1	No
PBX2	0.623886	1	No
PHB2	0.268737	3	No
PHF20	0.557019	4	No
PHF21A	0.0207	7	No
PKNOX1	0.00806211	27	No
POLR2A	0.0237693	32	No
POLR3A	0.274392	1	No
POU5F1	0.0358507	5	No
PPARG	0.0237693	12	No
PPP1R10	0.312188	1	No
PRDM1	0	19	No
PRDM10	0.0237693	21	No
PRDM2	0.305512	2	No
PRDM4	0	12	No
PRDM6	0	20	No
PTBP1	0.678077	1	No
RAD21	0.0632172	24	No
RAD51	0.0151497	6	No
RARA	0.0439051	14	No
RB1	0.0983203	12	No
RBAK	0.557019	1	No
RBBP5	0.124497	2	No
RBM39	0.560597	1	No
RBPJ	0.0151497	13	No
RCOR1	0	20	No
RCOR2	0.0284986	10	No
RELA	0.355812	6	No
RERE	0.117781	6	No
REST	0	30	No
RFX1	0.00806211	15	No
RFX3	0.133302	4	Yes
RFX5	0.0983203	10	No
RFXANK	0.65456	2	No
RNF2	0.0151497	14	No
RUNX1	0.298253	2	No
RUNX3	0.174255	16	No
RXRA	0.0151497	21	Yes
RXRB	0.0151497	16	No
SAP130	0.0207	20	No
SCRT1	0.213409	7	No
SCRT2	0.00806211	17	No
SIN3A	0.0125901	20	No
SIN3B	0.295141	3	No
SIRT6	0.469579	1	No
SIX5	0.12415	5	No
SKIL	0.14575	9	No
SMAD4	0.0125901	17	No
SMAD5	0.0125901	11	No
SMARCA4	0.0358507	17	No
SMARCA5	0.360983	10	No
SMARCB1	0.367159	3	No
SMARCC1	0.188873	4	No
SMARCC2	0.379824	2	No
SMARCE1	0.152627	14	No
SMC3	0.613071	7	No
SNIP1	0.117781	3	No
SOX13	0.0207	17	No
SOX5	0.0788427	13	Yes
SOX6	0.0781219	13	No
SP1	0.0125901	33	No
SP2	0.0456686	12	No
SP3	0.0417764	12	No
SP5	0.0284986	12	No
SP7	0.0125901	18	No
SREBF1	0.03726	7	Yes
SREBF2	0.744876	1	Yes
SRF	0.557861	1	No
SSRP1	0.0417764	7	No
STAT1	0.14575	6	No
STAT3	0.172724	5	No
STAT5A	0.0358507	7	No
SUPT5H	0.120043	9	No
SUZ12	0.413815	2	No
TAF1	0.0310967	8	No
TAF7	0.19884	5	No
TAL1	0.13256	8	No
TARDBP	0	19	No
TBX3	0.0207	6	No
TCF12	0.0940964	10	No
TCF7	0.182909	6	No
TCF7L2	0	15	No
TEAD1	0.0417764	13	No
TEAD2	0.734058	1	No
TEAD3	0.128454	13	No
TEAD4	0.117781	11	No
TFAP4	0.194193	9	No
TFDP1	0.03726	11	No
TFE3	0.0310967	11	No
TGIF2	0.097086	9	No
THAP11	0.0483727	14	No
THRB	0.466249	4	No
TRIM22	0.295141	12	No
TRIM24	0.0788427	11	No
TRIM25	0.203759	3	No
TRIM28	0.591592	3	No
TSC22D4	0.149223	2	No
TSHZ1	0.319194	4	No
USF1	0.0185673	11	No
USF2	0.198001	7	No
VEZF1	0.0400941	15	No
WT1	0.00806211	13	No
XRCC5	0.152627	11	Yes
YBX1	0.378028	2	No
YBX3	0.4884	1	No
YY1	0	23	No
YY2	0	9	No
ZBED1	0.202952	6	No
ZBTB1	0.03726	5	No
ZBTB10	0.0151497	10	No
ZBTB11	0	18	No
ZBTB12	0.0185673	8	No
ZBTB17	0	22	No
ZBTB2	0.174255	7	No
ZBTB20	0.0185673	14	Yes
ZBTB21	0.0270318	10	No
ZBTB25	0.129523	8	No
ZBTB26	0	16	No
ZBTB33	0.150944	17	No
ZBTB40	0.287541	8	No
ZBTB44	0	16	Yes
ZBTB48	0	17	No
ZBTB5	0.479569	2	No
ZBTB6	0.0548315	7	No
ZBTB7A	0	9	No
ZBTB7B	0.298253	3	No
ZBTB8A	0.0335431	13	No
ZC3H8	0.150944	6	Yes
ZEB1	0.00806211	10	No
ZEB2	0	22	Yes
ZFHX2	0.00806211	19	No
ZFP3	0.00806211	5	No
ZFP37	0.120043	8	No
ZFP41	0.244905	1	No
ZFP64	0.541524	3	No
ZFP69B	0.146372	9	No
ZFP91	0.117781	6	No
ZFX	0.173709	10	No
ZGPAT	0.107892	13	No
ZHX1	0.673447	1	No
ZHX2	0.119632	6	No
ZIC2	0	22	Yes
ZIK1	0.295141	1	No
ZKSCAN1	0.125827	8	Yes
ZKSCAN8	0.150364	9	No
ZMYM3	0.0923478	9	No
ZNF10	0.03726	9	No
ZNF121	0.312188	7	No
ZNF133	0.663552	1	No
ZNF138	0.29735	1	No
ZNF140	0.557019	1	No
ZNF143	0.309306	12	No
ZNF146	0.706594	2	No
ZNF148	0.737472	4	No
ZNF157	0.206001	2	No
ZNF16	0.531986	1	No
ZNF169	0.0483727	3	No
ZNF174	0.393727	1	No
ZNF18	0.213409	6	No
ZNF184	0.177689	7	No
ZNF189	0.0989145	12	No
ZNF19	0.356354	1	No
ZNF197	0.626646	2	No
ZNF2	0.135773	10	No
ZNF202	0.226968	2	No
ZNF205	0.0151497	12	No
ZNF207	0.20214	7	Yes
ZNF213	0.00806211	9	No
ZNF217	0.0358507	17	No
ZNF223	0	7	No
ZNF239	0.672348	1	No
ZNF24	0	23	No
ZNF266	0.22126	2	No
ZNF280D	0.0567971	5	Yes
ZNF3	0.379415	3	No
ZNF311	0.330179	1	No
ZNF316	0.293268	11	No
ZNF318	0.140463	5	No
ZNF324	0.269846	6	No
ZNF335	0.00806211	20	No
ZNF341	0	17	No
ZNF354B	0.0989145	3	No
ZNF362	0.0335431	11	No
ZNF366	0	19	No
ZNF37A	0.167541	2	No
ZNF384	0.0694098	10	No
ZNF395	0.0905825	9	Yes
ZNF398	0	15	No
ZNF407	0.410263	2	No
ZNF423	0	12	No
ZNF48	0.0270318	14	No
ZNF488	0.228378	2	No
ZNF501	0.0207	11	No
ZNF507	0.424279	1	No
ZNF511	0.105269	8	No
ZNF512	0.03726	7	No
ZNF512B	0.0185673	5	No
ZNF513	0.0151497	7	No
ZNF518A	0.174255	6	No
ZNF524	0.0151497	9	No
ZNF547	0.643982	1	No
ZNF548	0.227675	2	No
ZNF558	0.298701	4	No
ZNF561	0.0335431	11	No
ZNF571	0.2415	1	No
ZNF580	0.00806211	17	No
ZNF592	0.0310967	16	No
ZNF600	0	20	No
ZNF610	0.104163	7	No
ZNF614	0.124497	9	No
ZNF621	0.346179	1	No
ZNF623	0.592343	2	No
ZNF624	0.413929	1	No
ZNF626	0.118715	2	No
ZNF629	0.0151497	16	No
ZNF639	0.0185673	14	No
ZNF644	0.03726	13	No
ZNF652	0.0504698	8	No
ZNF654	0.513988	6	No
ZNF660	0.0465011	13	No
ZNF662	0.346179	1	No
ZNF664	0.0151497	10	No
ZNF687	0.188873	12	No
ZNF692	0.0284986	14	No
ZNF7	0.25756	3	No
ZNF701	0.444898	1	No
ZNF707	0.457299	1	No
ZNF740	0.0465011	7	No
ZNF766	0.0465011	10	No
ZNF768	0.239459	3	No
ZNF777	0.166217	4	No
ZNF785	0.135773	4	No
ZNF791	0.0617662	3	No
ZNF792	0.0439051	11	No
ZNF837	0.182909	2	No
ZNF843	0	15	No
ZSCAN16	0.0525189	5	No
ZSCAN18	0.167541	3	No
ZSCAN21	0.188606	8	No
ZSCAN23	0.224132	4	No
ZSCAN26	0.489438	1	No
ZSCAN29	0.152066	8	No
ZSCAN4	0	11	No
ZSCAN5A	0.404396	3	No
ZSCAN5C	0.0989145	7	No
ZSCAN9	0.0284986	10	No
ZXDB	0	18	No

## Sheet: TFs in cell types
cell type	number of human-specific genes found in GeneHancer database	overlap with brain active HAR-enhancers	permutation test, P	number of human-specific TFs at HARs-enhancers overlaps	TFs
Ast	598	54	0.01698302	17	"ZEB2, ZBTB20, CBX5, CC2D1A, ZKSCAN1, FOS, ZNF207, EGR1, BCL11B, BCL11A, FOXP1, KLF8, DRAP1, SREBF2, NFIA, JUNB, NR2F1"
In	393	36	0.03296703	12	"ZBTB20, ZEB2, ZNF207, ZKSCAN1, ZBTB44, JUNB, FOS, NFIA, NR2F1, ZIC2, MXD4, NR2C1"
Od	470	49	0.007992008	14	"ZBTB20, NFIA, SREBF2, HES1, RXRA, MXI1, SREBF1, MXD4, ZNF207, ZKSCAN1, ZEB2, CBX5, ZBTB44, XRCC5"
OPC	155	20	0.03596404	5	"ZBTB20, NFIA, ZEB2, ZKSCAN1, ZNF207"
MG	104	8	0.2777223	5	"ZEB2, KLF6, JUNB, FOS, ZBTB20"
Neu	214	26	0.03496503	5	"ZBTB20, ZEB2, NFIA, ZNF207, ZIC2"
Ex	522	45	0.04695305	17	"CC2D1A, FOXP1, RFX3, CUX1, EGR1, ZC3H8, ZKSCAN1, ZNF207, ZNF280D, CBX5, BCL11A, ZBTB44, ZNF395, FOS, ETV5, E4F1, SOX5"
all cell types combined	1263	98	0.004995005	35	"BCL11A, BCL11B, CBX5, CC2D1A, CUX1, DRAP1, E4F1, EGR1, ETV5, FOS, FOXP1, HES1, JUNB, KLF6, KLF8, MXD4, MXI1, NFIA, NR2C1, NR2F1, RFX3, RXRA, SOX5, SREBF1, SREBF2, XRCC5, ZBTB20, ZBTB44, ZC3H8, ZEB2, ZIC2, ZKSCAN1, ZNF207, ZNF280D, ZNF395"

## Sheet: human-specific genes
	p_val	avg_logFC	pct.H	pct.O	p_val_adj	cell_type
ENSG00000167996	0	2.95738	0.574	0.01	0	AC Ex
ENSG00000166501	0	2.87269	0.651	0.005	0	AC Ex
ENSG00000101489	0	2.27987	0.452	0.007	0	AC Ex
ENSG00000131584	0	2.14808	0.387	0.002	0	AC Ex
ENSG00000260230	0	1.97734	0.384	0.009	0	AC Ex
ENSG00000178980	0	1.97728	0.355	0.003	0	AC Ex
ENSG00000148053	0	1.97124	0.316	0.003	0	AC Ex
ENSG00000175161	0	1.9319	0.409	0.026	0	AC Ex
ENSG00000163682	0	1.86124	0.338	0.01	0	AC Ex
ENSG00000156052	0	1.80847	0.278	0	0	AC Ex
ENSG00000187109	0	1.78478	0.367	0.018	0	AC Ex
ENSG00000196220	0	1.76476	0.321	0.009	0	AC Ex
ENSG00000100354	0	1.75959	0.567	0.081	0	AC Ex
ENSG00000182389	0	1.75022	0.336	0.01	0	AC Ex
ENSG00000091592	0	1.74275	0.268	0	0	AC Ex
ENSG00000077264	0	1.7212	0.374	0.033	0	AC Ex
ENSG00000183049	0	1.71429	0.311	0.01	0	AC Ex
ENSG00000007237	0	1.69931	0.304	0.013	0	AC Ex
ENSG00000071082	0	1.69105	0.569	0.106	0	AC Ex
ENSG00000241343	0	1.64657	0.255	0.001	0	AC Ex
ENSG00000139970	0	1.50728	0.506	0.074	0	AC Ex
ENSG00000156113	2.78314e-306	1.59746	0.421	0.06	3.06423e-302	AC Ex
ENSG00000163531	4.89047e-304	1.58009	0.252	0.003	5.38441e-300	AC Ex
ENSG00000184702	4.1696e-302	-2.61948	0.002	0.534	4.59073e-298	AC Ex
ENSG00000258643	7.92034e-302	-2.64747	0	0.532	8.72029e-298	AC Ex
ENSG00000152402	7.65638e-293	1.65863	0.239	0.002	8.42967e-289	AC Ex
ENSG00000180354	6.42703e-287	1.65324	0.228	0.001	7.07616e-283	AC Ex
ENSG00000240694	3.00181e-285	1.65177	0.258	0.008	3.30499e-281	AC Ex
ENSG00000178662	4.23975e-285	1.63849	0.258	0.008	4.66796e-281	AC Ex
ENSG00000147481	1.48234e-274	1.56509	0.251	0.008	1.63206e-270	AC Ex
ENSG00000145990	3.23912e-274	1.52735	0.234	0.004	3.56627e-270	AC Ex
ENSG00000173611	9.16767e-271	1.41611	0.237	0.006	1.00936e-266	AC Ex
ENSG00000166619	4.76977e-267	1.5878	0.21	0	5.25152e-263	AC Ex
ENSG00000168000	2.57575e-264	-2.3848	0.016	0.501	2.8359e-260	AC Ex
ENSG00000171858	5.6181e-264	1.46541	0.227	0.004	6.18553e-260	AC Ex
ENSG00000115977	4.57114e-261	1.18519	0.463	0.086	5.03283e-257	AC Ex
ENSG00000171476	8.87138e-259	1.46529	0.457	0.097	9.76739e-255	AC Ex
ENSG00000099308	1.09478e-256	1.51616	0.239	0.009	1.20535e-252	AC Ex
ENSG00000152578	1.58749e-255	1.42257	0.347	0.045	1.74782e-251	AC Ex
ENSG00000130477	2.16195e-252	1.4358	0.202	0.001	2.3803e-248	AC Ex
ENSG00000157542	2.93783e-249	1.47269	0.245	0.012	3.23455e-245	AC Ex
ENSG00000177511	1.53766e-247	1.49251	0.276	0.022	1.69296e-243	AC Ex
ENSG00000049618	3.60246e-247	1.47768	0.332	0.043	3.96631e-243	AC Ex
ENSG00000162409	6.48689e-241	1.45219	0.215	0.006	7.14206e-237	AC Ex
ENSG00000158856	1.55237e-239	1.47156	0.198	0.002	1.70916e-235	AC Ex
ENSG00000156976	1.04564e-228	1.21245	0.524	0.148	1.15125e-224	AC Ex
ENSG00000160613	1.57558e-227	1.40048	0.229	0.013	1.73471e-223	AC Ex
ENSG00000136238	1.48171e-225	1.51145	0.268	0.025	1.63137e-221	AC Ex
ENSG00000171475	3.05895e-221	1.34785	0.195	0.005	3.3679e-217	AC Ex
ENSG00000185352	6.68673e-221	1.31836	0.175	0	7.36209e-217	AC Ex
ENSG00000140538	6.03957e-220	1.24714	0.511	0.152	6.64957e-216	AC Ex
ENSG00000152208	8.02403e-214	1.25718	0.21	0.01	8.83446e-210	AC Ex
ENSG00000048740	1.20515e-209	0.85614	0.712	0.267	1.32688e-205	AC Ex
ENSG00000119820	8.91362e-206	1.23609	0.169	0.001	9.8139e-202	AC Ex
ENSG00000145495	1.65092e-205	1.43921	0.267	0.031	1.81767e-201	AC Ex
ENSG00000110427	7.0061e-205	1.37353	0.266	0.03	7.71371e-201	AC Ex
ENSG00000112379	9.62301e-205	1.26176	0.277	0.033	1.05949e-200	AC Ex
ENSG00000075624	1.36924e-203	1.06138	0.709	0.342	1.50753e-199	AC Ex
ENSG00000184672	4.84421e-203	1.25909	0.197	0.008	5.33348e-199	AC Ex
ENSG00000163596	2.53897e-201	1.2135	0.216	0.014	2.79541e-197	AC Ex
ENSG00000178531	2.83374e-200	1.24278	0.16	0	3.11995e-196	AC Ex
ENSG00000107331	1.05033e-199	1.26068	0.164	0.001	1.15642e-195	AC Ex
ENSG00000186469	1.08806e-198	1.3003	0.157	0	1.19795e-194	AC Ex
ENSG00000150471	4.24775e-198	1.28069	0.184	0.006	4.67677e-194	AC Ex
ENSG00000162105	1.67983e-197	1.22451	0.17	0.003	1.84949e-193	AC Ex
ENSG00000186260	6.09724e-197	1.23854	0.206	0.012	6.71306e-193	AC Ex
ENSG00000256500	3.75835e-196	-2.40627	0	0.389	4.13794e-192	AC Ex
ENSG00000114279	4.36328e-196	1.30299	0.191	0.008	4.80397e-192	AC Ex
ENSG00000120251	1.15172e-193	0.772525	0.765	0.377	1.26805e-189	AC Ex
ENSG00000183723	4.16979e-192	1.23617	0.154	0.001	4.59094e-188	AC Ex
ENSG00000169851	9.31547e-190	1.15536	0.363	0.074	1.02563e-185	AC Ex
ENSG00000197872	2.61457e-188	1.24758	0.24	0.024	2.87864e-184	AC Ex
ENSG00000170921	5.95422e-188	1.28818	0.223	0.02	6.55559e-184	AC Ex
ENSG00000154229	8.67651e-187	1.1997	0.182	0.008	9.55284e-183	AC Ex
ENSG00000152580	2.5654e-186	1.07544	0.149	0	2.8245e-182	AC Ex
ENSG00000151067	7.6122e-186	1.17303	0.164	0.004	8.38103e-182	AC Ex
ENSG00000183775	1.92328e-185	1.25176	0.325	0.061	2.11753e-181	AC Ex
ENSG00000185630	2.7866e-185	1.25721	0.353	0.076	3.06805e-181	AC Ex
ENSG00000105993	6.04068e-185	1.33846	0.191	0.011	6.65079e-181	AC Ex
ENSG00000008056	3.49394e-183	1.31777	0.296	0.048	3.84683e-179	AC Ex
ENSG00000126070	5.38092e-183	1.22979	0.185	0.01	5.9244e-179	AC Ex
ENSG00000075043	2.63446e-182	1.28483	0.206	0.016	2.90054e-178	AC Ex
ENSG00000145864	2.65417e-182	1.26787	0.356	0.079	2.92224e-178	AC Ex
ENSG00000171992	8.00424e-181	1.30579	0.173	0.007	8.81267e-177	AC Ex
ENSG00000118473	6.08645e-180	1.22499	0.181	0.009	6.70118e-176	AC Ex
ENSG00000169564	8.71893e-180	1.30582	0.149	0.001	9.59954e-176	AC Ex
ENSG00000156642	7.82475e-179	1.26484	0.276	0.042	8.61505e-175	AC Ex
ENSG00000148408	1.15727e-178	1.14967	0.198	0.014	1.27415e-174	AC Ex
ENSG00000172461	3.50295e-177	1.16086	0.157	0.004	3.85675e-173	AC Ex
ENSG00000116754	9.99326e-176	0.987953	0.515	0.174	1.10026e-171	AC Ex
ENSG00000124313	1.83449e-175	1.1771	0.147	0.002	2.01978e-171	AC Ex
ENSG00000145819	7.40032e-175	1.19849	0.181	0.01	8.14775e-171	AC Ex
ENSG00000185386	1.66906e-174	1.18799	0.144	0.001	1.83764e-170	AC Ex
ENSG00000176102	1.53201e-173	1.14271	0.169	0.007	1.68674e-169	AC Ex
ENSG00000123612	1.24842e-170	1.28213	0.141	0.001	1.37451e-166	AC Ex
ENSG00000104290	2.88416e-170	1.24011	0.285	0.05	3.17546e-166	AC Ex
ENSG00000232112	1.1862e-169	1.23152	0.301	0.057	1.30601e-165	AC Ex
ENSG00000244754	4.05657e-169	1.08484	0.477	0.165	4.46628e-165	AC Ex
ENSG00000135525	1.26336e-166	1.162	0.275	0.047	1.39096e-162	AC Ex
ENSG00000128585	2.3811e-165	1.1017	0.148	0.004	2.62159e-161	AC Ex
ENSG00000139746	8.95432e-165	1.01536	0.336	0.071	9.85871e-161	AC Ex
ENSG00000070214	1.08929e-163	1.22026	0.204	0.02	1.19931e-159	AC Ex
ENSG00000175048	2.47891e-163	1.15197	0.139	0.002	2.72927e-159	AC Ex
ENSG00000204442	2.45107e-162	1.1603	0.144	0.003	2.69863e-158	AC Ex
ENSG00000171435	7.04257e-162	1.04061	0.196	0.017	7.75387e-158	AC Ex
ENSG00000176903	6.40727e-161	1.08549	0.129	0	7.0544e-157	AC Ex
ENSG00000078018	1.83631e-159	0.903137	0.498	0.167	2.02178e-155	AC Ex
ENSG00000115875	7.51701e-159	1.04489	0.213	0.024	8.27623e-155	AC Ex
ENSG00000171617	5.0077e-158	0.860274	0.689	0.377	5.51348e-154	AC Ex
ENSG00000089916	1.10042e-156	1.09321	0.188	0.017	1.21157e-152	AC Ex
ENSG00000162989	1.47194e-156	1.14634	0.149	0.006	1.62061e-152	AC Ex
ENSG00000175893	6.69595e-155	1.13427	0.169	0.011	7.37224e-151	AC Ex
ENSG00000157064	1.58151e-154	1.08768	0.129	0.001	1.74124e-150	AC Ex
ENSG00000198162	6.41319e-153	1.18792	0.244	0.038	7.06092e-149	AC Ex
ENSG00000158711	1.19824e-152	0.901236	0.128	0.001	1.31926e-148	AC Ex
ENSG00000132024	1.75129e-152	1.0637	0.221	0.029	1.92817e-148	AC Ex
ENSG00000146223	3.33098e-152	1.03577	0.162	0.01	3.66741e-148	AC Ex
ENSG00000011347	4.40446e-150	-1.04646	0.327	0.645	4.84931e-146	AC Ex
ENSG00000135541	1.48419e-149	0.907687	0.619	0.322	1.63409e-145	AC Ex
ENSG00000196498	1.51612e-149	1.07589	0.151	0.008	1.66925e-145	AC Ex
ENSG00000074054	4.18677e-149	1.09438	0.154	0.008	4.60964e-145	AC Ex
ENSG00000162065	3.19343e-148	-1.58972	0.104	0.442	3.51597e-144	AC Ex
ENSG00000142235	7.04131e-147	1.10937	0.119	0.001	7.75248e-143	AC Ex
ENSG00000100784	5.275e-146	1.10735	0.226	0.033	5.80777e-142	AC Ex
ENSG00000124406	7.49396e-146	1.00124	0.24	0.038	8.25084e-142	AC Ex
ENSG00000099204	1.00214e-145	1.13412	0.158	0.01	1.10335e-141	AC Ex
ENSG00000166405	1.01727e-145	1.03385	0.187	0.019	1.12001e-141	AC Ex
ENSG00000107863	1.52212e-145	1.04478	0.259	0.047	1.67585e-141	AC Ex
ENSG00000174080	1.90895e-144	1.08318	0.122	0.001	2.10176e-140	AC Ex
ENSG00000104967	2.80252e-144	1.07954	0.122	0.001	3.08558e-140	AC Ex
ENSG00000136535	3.86175e-144	1.13319	0.184	0.019	4.25179e-140	AC Ex
ENSG00000172292	9.45043e-144	1.05072	0.115	0	1.04049e-139	AC Ex
ENSG00000107147	2.79551e-143	1.02467	0.237	0.037	3.07785e-139	AC Ex
ENSG00000196199	3.9952e-143	0.780014	0.69	0.402	4.39871e-139	AC Ex
ENSG00000114861	4.9333e-143	1.10567	0.269	0.053	5.43157e-139	AC Ex
ENSG00000183715	3.01933e-142	0.970645	0.117	0.001	3.32429e-138	AC Ex
ENSG00000120049	4.14342e-142	1.11223	0.232	0.037	4.56191e-138	AC Ex
ENSG00000075391	1.04394e-141	1.0343	0.246	0.043	1.14938e-137	AC Ex
ENSG00000023171	1.88704e-141	1.04253	0.14	0.006	2.07763e-137	AC Ex
ENSG00000110721	5.43306e-141	0.938702	0.131	0.004	5.9818e-137	AC Ex
ENSG00000176165	1.38608e-140	1.01784	0.119	0.001	1.52608e-136	AC Ex
ENSG00000120265	1.86743e-139	1.13037	0.206	0.028	2.05604e-135	AC Ex
ENSG00000143322	1.91714e-138	0.970604	0.128	0.004	2.11077e-134	AC Ex
ENSG00000122574	1.38801e-137	1.05771	0.116	0.001	1.52819e-133	AC Ex
ENSG00000011052	6.53519e-137	-1.87214	0	0.293	7.19524e-133	AC Ex
ENSG00000134369	1.26529e-136	0.993642	0.125	0.003	1.39308e-132	AC Ex
ENSG00000116106	4.45248e-136	0.953718	0.294	0.065	4.90218e-132	AC Ex
ENSG00000235194	4.54259e-136	0.863285	0.128	0.004	5.00139e-132	AC Ex
ENSG00000136267	1.65944e-135	1.08487	0.171	0.017	1.82704e-131	AC Ex
ENSG00000132300	1.75704e-135	1.03674	0.17	0.016	1.9345e-131	AC Ex
ENSG00000213639	2.63479e-135	1.16863	0.184	0.021	2.9009e-131	AC Ex
ENSG00000104904	2.74852e-135	1.06623	0.348	0.102	3.02613e-131	AC Ex
ENSG00000067606	3.44326e-135	1.13199	0.141	0.008	3.79103e-131	AC Ex
ENSG00000197121	3.23469e-134	1.01643	0.129	0.005	3.56139e-130	AC Ex
ENSG00000227051	4.03134e-134	0.941994	0.113	0.001	4.43851e-130	AC Ex
ENSG00000080298	6.74081e-134	1.00823	0.154	0.012	7.42163e-130	AC Ex
ENSG00000277363	2.07389e-133	1.18592	0.297	0.075	2.28335e-129	AC Ex
ENSG00000150672	2.17046e-133	1.09049	0.268	0.059	2.38967e-129	AC Ex
ENSG00000172995	1.94376e-132	-0.981901	0.359	0.644	2.14008e-128	AC Ex
ENSG00000177169	2.70903e-131	0.948715	0.104	0	2.98264e-127	AC Ex
ENSG00000167654	1.0981e-129	-1.36889	0.161	0.465	1.209e-125	AC Ex
ENSG00000121064	5.64217e-129	0.9248	0.167	0.017	6.21202e-125	AC Ex
ENSG00000146433	3.58102e-128	0.946948	0.116	0.003	3.9427e-124	AC Ex
ENSG00000084090	9.54613e-128	1.10403	0.152	0.013	1.05103e-123	AC Ex
ENSG00000204406	1.01741e-127	0.97827	0.145	0.011	1.12017e-123	AC Ex
ENSG00000198216	2.87135e-127	0.99267	0.237	0.045	3.16136e-123	AC Ex
ENSG00000244588	3.78633e-127	-1.80896	0.001	0.277	4.16875e-123	AC Ex
ENSG00000065883	5.20096e-127	1.04359	0.193	0.027	5.72625e-123	AC Ex
ENSG00000173933	6.62201e-126	0.737128	0.102	0	7.29083e-122	AC Ex
ENSG00000257923	1.63241e-125	0.979089	0.113	0.003	1.79728e-121	AC Ex
ENSG00000140526	1.97355e-125	0.96352	0.116	0.004	2.17287e-121	AC Ex
ENSG00000140945	7.68955e-125	1.03315	0.207	0.034	8.46619e-121	AC Ex
ENSG00000102466	8.87081e-125	0.970292	0.118	0.004	9.76676e-121	AC Ex
ENSG00000107864	1.50166e-124	0.939564	0.104	0.001	1.65332e-120	AC Ex
ENSG00000157741	2.45613e-124	1.01362	0.209	0.034	2.7042e-120	AC Ex
ENSG00000133114	6.66294e-124	0.92228	0.16	0.016	7.33589e-120	AC Ex
ENSG00000175727	1.91912e-123	0.98374	0.168	0.02	2.11295e-119	AC Ex
ENSG00000175874	3.69737e-123	0.961175	0.356	0.111	4.0708e-119	AC Ex
ENSG00000089737	1.77216e-122	-0.93635	0.373	0.644	1.95115e-118	AC Ex
ENSG00000109158	2.55477e-121	0.994918	0.137	0.01	2.8128e-117	AC Ex
ENSG00000059588	3.10661e-121	0.939809	0.198	0.031	3.42038e-117	AC Ex
ENSG00000100077	3.3973e-120	0.969606	0.123	0.006	3.74043e-116	AC Ex
ENSG00000152495	6.10096e-120	1.05027	0.126	0.007	6.71715e-116	AC Ex
ENSG00000186310	4.5132e-119	1.19195	0.14	0.012	4.96903e-115	AC Ex
ENSG00000103174	5.64818e-119	0.858359	0.15	0.014	6.21865e-115	AC Ex
ENSG00000132718	1.46399e-118	0.889107	0.305	0.081	1.61186e-114	AC Ex
ENSG00000170579	5.6986e-117	1.08488	0.26	0.063	6.27416e-113	AC Ex
ENSG00000168952	9.50606e-117	0.949394	0.108	0.003	1.04662e-112	AC Ex
ENSG00000182667	1.22592e-116	0.988676	0.373	0.131	1.34974e-112	AC Ex
ENSG00000196990	2.97037e-116	-1.75341	0.003	0.26	3.27037e-112	AC Ex
ENSG00000154556	3.49391e-116	0.929857	0.308	0.088	3.8468e-112	AC Ex
ENSG00000120738	3.57782e-116	-1.58774	0.057	0.342	3.93918e-112	AC Ex
ENSG00000178104	4.13809e-116	0.970598	0.197	0.033	4.55604e-112	AC Ex
ENSG00000164924	4.9827e-115	0.816291	0.428	0.157	5.48595e-111	AC Ex
ENSG00000163728	1.17734e-113	0.857684	0.368	0.124	1.29625e-109	AC Ex
ENSG00000104177	2.58081e-113	0.978045	0.197	0.034	2.84148e-109	AC Ex
ENSG00000074590	3.64525e-113	-1.03257	0.28	0.566	4.01342e-109	AC Ex
ENSG00000156103	7.04611e-113	1.01171	0.132	0.011	7.75777e-109	AC Ex
ENSG00000145743	2.80006e-112	1.07205	0.134	0.012	3.08287e-108	AC Ex
ENSG00000050438	3.20664e-112	0.929314	0.163	0.021	3.53051e-108	AC Ex
ENSG00000105223	1.16995e-111	-0.945602	0.279	0.558	1.28811e-107	AC Ex
ENSG00000111371	1.28377e-111	1.00646	0.111	0.005	1.41344e-107	AC Ex
ENSG00000134852	4.158e-111	0.86933	0.108	0.004	4.57796e-107	AC Ex
ENSG00000165152	3.55962e-109	0.933972	0.122	0.008	3.91914e-105	AC Ex
ENSG00000171867	4.56347e-109	0.75205	0.627	0.34	5.02438e-105	AC Ex
ENSG00000198700	5.91936e-108	0.863177	0.134	0.012	6.51722e-104	AC Ex
ENSG00000214595	7.31469e-108	0.840613	0.119	0.008	8.05347e-104	AC Ex
ENSG00000078328	8.47155e-108	0.909005	0.387	0.146	9.32718e-104	AC Ex
ENSG00000164880	1.02308e-107	0.93696	0.143	0.015	1.12641e-103	AC Ex
ENSG00000138411	1.80319e-107	0.888991	0.145	0.016	1.98532e-103	AC Ex
ENSG00000133401	2.01035e-107	0.93844	0.151	0.018	2.21339e-103	AC Ex
ENSG00000090863	9.60076e-107	0.985644	0.208	0.042	1.05704e-102	AC Ex
ENSG00000054523	1.47246e-106	0.94387	0.251	0.063	1.62118e-102	AC Ex
ENSG00000113441	1.54773e-106	0.921174	0.117	0.008	1.70406e-102	AC Ex
ENSG00000169967	2.72057e-106	0.808095	0.11	0.006	2.99535e-102	AC Ex
ENSG00000242265	1.52759e-105	1.02153	0.12	0.009	1.68187e-101	AC Ex
ENSG00000156011	2.57109e-105	0.831997	0.474	0.218	2.83077e-101	AC Ex
ENSG00000006210	1.93849e-104	-1.16716	0.131	0.416	2.13428e-100	AC Ex
ENSG00000196872	1.99979e-104	0.860883	0.153	0.02	2.20177e-100	AC Ex
ENSG00000169933	3.41306e-104	0.873371	0.101	0.004	3.75778e-100	AC Ex
ENSG00000169783	4.51553e-104	-1.13794	0.152	0.43	4.97159e-100	AC Ex
ENSG00000143252	3.4486e-103	0.836552	0.104	0.005	3.79691e-99	AC Ex
ENSG00000078043	6.86957e-102	0.865431	0.287	0.085	7.5634e-98	AC Ex
ENSG00000112697	1.06851e-101	1.0857	0.211	0.047	1.17643e-97	AC Ex
ENSG00000182831	1.24126e-101	0.905875	0.11	0.007	1.36663e-97	AC Ex
ENSG00000177707	2.03452e-101	0.860295	0.182	0.032	2.24001e-97	AC Ex
ENSG00000138398	2.40718e-101	0.787227	0.227	0.051	2.6503e-97	AC Ex
ENSG00000136854	3.52411e-101	-0.807031	0.379	0.622	3.88005e-97	AC Ex
ENSG00000170153	4.81327e-101	0.875958	0.107	0.006	5.29942e-97	AC Ex
ENSG00000153707	1.37771e-100	0.984959	0.183	0.034	1.51686e-96	AC Ex
ENSG00000130294	7.78609e-100	0.701348	0.293	0.083	8.57248e-96	AC Ex
ENSG00000141252	2.4795e-99	0.877091	0.132	0.014	2.72993e-95	AC Ex
ENSG00000092964	4.08375e-99	-0.745199	0.438	0.665	4.4962e-95	AC Ex
ENSG00000108306	2.40027e-98	0.8298	0.122	0.011	2.64269e-94	AC Ex
ENSG00000149970	3.42108e-98	0.842248	0.393	0.16	3.76661e-94	AC Ex
ENSG00000157388	1.83727e-97	0.806801	0.145	0.019	2.02284e-93	AC Ex
ENSG00000145782	7.4407e-97	0.920887	0.113	0.009	8.19221e-93	AC Ex
ENSG00000169057	1.31395e-96	0.81045	0.122	0.012	1.44666e-92	AC Ex
ENSG00000118971	1.37279e-96	0.965854	0.192	0.04	1.51144e-92	AC Ex
ENSG00000004059	1.78696e-96	-1.31499	0.091	0.342	1.96744e-92	AC Ex
ENSG00000144406	5.6126e-96	0.77061	0.314	0.101	6.17947e-92	AC Ex
ENSG00000038382	7.63693e-96	0.902148	0.153	0.023	8.40825e-92	AC Ex
ENSG00000171246	8.7651e-96	-1.03401	0.357	0.566	9.65038e-92	AC Ex
ENSG00000153956	1.8554e-95	0.949373	0.176	0.033	2.0428e-91	AC Ex
ENSG00000145860	2.37842e-95	0.923097	0.219	0.053	2.61864e-91	AC Ex
ENSG00000115525	2.58201e-95	0.818511	0.19	0.037	2.84279e-91	AC Ex
ENSG00000072201	7.73131e-95	0.878903	0.123	0.013	8.51217e-91	AC Ex
ENSG00000188811	7.83486e-95	0.733998	0.147	0.021	8.62618e-91	AC Ex
ENSG00000135924	1.01262e-94	0.845506	0.199	0.042	1.1149e-90	AC Ex
ENSG00000185070	3.48852e-94	0.83935	0.293	0.093	3.84086e-90	AC Ex
ENSG00000106771	6.67925e-94	0.845367	0.124	0.013	7.35386e-90	AC Ex
ENSG00000175866	9.73506e-94	-0.819995	0.381	0.617	1.07183e-89	AC Ex
ENSG00000173166	1.87228e-93	0.827311	0.121	0.012	2.06138e-89	AC Ex
ENSG00000155744	2.04413e-93	0.803492	0.245	0.065	2.25059e-89	AC Ex
ENSG00000144161	1.82651e-92	0.733261	0.207	0.046	2.01099e-88	AC Ex
ENSG00000106261	5.15957e-92	0.794622	0.178	0.034	5.68069e-88	AC Ex
ENSG00000080823	5.17756e-92	0.82177	0.143	0.02	5.7005e-88	AC Ex
ENSG00000171262	1.66648e-91	0.896179	0.103	0.007	1.83479e-87	AC Ex
ENSG00000185565	1.10292e-90	0.857067	0.195	0.043	1.21431e-86	AC Ex
ENSG00000135709	2.22413e-90	0.907428	0.121	0.013	2.44877e-86	AC Ex
ENSG00000076864	3.87209e-90	-0.978732	0.267	0.51	4.26317e-86	AC Ex
ENSG00000184515	1.09642e-89	0.967727	0.138	0.02	1.20715e-85	AC Ex
ENSG00000152767	2.19339e-89	0.771626	0.128	0.016	2.41492e-85	AC Ex
ENSG00000174456	2.40995e-89	0.721535	0.105	0.008	2.65335e-85	AC Ex
ENSG00000185883	1.24768e-88	-2.0214	0.002	0.205	1.37369e-84	AC Ex
ENSG00000176171	4.86867e-88	0.891273	0.136	0.019	5.3604e-84	AC Ex
ENSG00000149187	2.45953e-86	-0.75587	0.4	0.627	2.70795e-82	AC Ex
ENSG00000133083	4.20348e-86	0.746966	0.285	0.092	4.62803e-82	AC Ex
ENSG00000152154	5.9601e-86	0.698985	0.21	0.05	6.56207e-82	AC Ex
ENSG00000023734	7.12286e-86	0.866801	0.103	0.009	7.84226e-82	AC Ex
ENSG00000149212	7.44097e-86	0.897726	0.139	0.021	8.19251e-82	AC Ex
ENSG00000160551	2.96349e-85	0.918263	0.196	0.047	3.26281e-81	AC Ex
ENSG00000167733	2.96725e-85	0.693367	0.136	0.02	3.26694e-81	AC Ex
ENSG00000108256	3.0134e-84	0.910945	0.116	0.013	3.31776e-80	AC Ex
ENSG00000102910	3.35777e-84	0.820711	0.151	0.027	3.6969e-80	AC Ex
ENSG00000138035	4.41269e-84	0.700147	0.106	0.01	4.85837e-80	AC Ex
ENSG00000134769	5.06351e-84	0.893691	0.173	0.036	5.57493e-80	AC Ex
ENSG00000108587	2.22327e-82	0.799975	0.107	0.011	2.44782e-78	AC Ex
ENSG00000105649	2.41609e-82	-1.06846	0.16	0.399	2.66012e-78	AC Ex
ENSG00000120694	3.81206e-82	0.806294	0.289	0.101	4.19708e-78	AC Ex
ENSG00000197323	5.33225e-82	0.799833	0.222	0.061	5.87081e-78	AC Ex
ENSG00000183741	6.25227e-82	-0.969673	0.234	0.468	6.88375e-78	AC Ex
ENSG00000151893	6.44218e-82	0.732344	0.13	0.019	7.09284e-78	AC Ex
ENSG00000243156	1.40169e-81	0.698827	0.191	0.045	1.54326e-77	AC Ex
ENSG00000166848	1.5117e-81	0.999327	0.225	0.067	1.66438e-77	AC Ex
ENSG00000054793	4.7934e-81	-0.890323	0.208	0.456	5.27753e-77	AC Ex
ENSG00000102908	5.53868e-81	0.786597	0.183	0.042	6.09809e-77	AC Ex
ENSG00000168259	7.37083e-81	0.935351	0.226	0.067	8.11529e-77	AC Ex
ENSG00000197912	2.0856e-80	0.83177	0.215	0.059	2.29624e-76	AC Ex
ENSG00000152822	6.75768e-80	0.745195	0.16	0.032	7.4402e-76	AC Ex
ENSG00000164031	9.93413e-80	0.904984	0.207	0.057	1.09375e-75	AC Ex
ENSG00000170540	2.03408e-79	0.743806	0.331	0.129	2.23952e-75	AC Ex
ENSG00000138326	3.50468e-79	0.735384	0.436	0.216	3.85865e-75	AC Ex
ENSG00000122417	8.67104e-79	0.768258	0.198	0.051	9.54681e-75	AC Ex
ENSG00000171055	2.16996e-78	0.739774	0.197	0.049	2.38912e-74	AC Ex
ENSG00000110076	4.85953e-78	-0.779548	0.291	0.53	5.35034e-74	AC Ex
ENSG00000119865	5.33445e-78	0.796512	0.107	0.012	5.87323e-74	AC Ex
ENSG00000135919	5.73981e-78	0.940461	0.24	0.077	6.31953e-74	AC Ex
ENSG00000135472	1.30593e-77	-0.706664	0.395	0.603	1.43783e-73	AC Ex
ENSG00000151694	1.3549e-77	0.744616	0.117	0.016	1.49175e-73	AC Ex
ENSG00000100320	2.68031e-77	0.776918	0.251	0.082	2.95102e-73	AC Ex
ENSG00000065989	3.03195e-77	-1.14165	0.121	0.348	3.33817e-73	AC Ex
ENSG00000025800	4.88814e-77	0.725717	0.162	0.035	5.38184e-73	AC Ex
ENSG00000116983	5.67102e-77	-0.950859	0.168	0.406	6.2438e-73	AC Ex
ENSG00000109472	7.7698e-77	0.862382	0.253	0.085	8.55456e-73	AC Ex
ENSG00000186001	9.91081e-77	0.771169	0.131	0.021	1.09118e-72	AC Ex
ENSG00000104490	2.21577e-76	-1.25648	0.085	0.304	2.43956e-72	AC Ex
ENSG00000153187	3.41715e-76	0.709917	0.384	0.174	3.76229e-72	AC Ex
ENSG00000163539	9.74882e-76	0.745174	0.231	0.07	1.07335e-71	AC Ex
ENSG00000167005	1.08915e-75	0.848487	0.103	0.012	1.19915e-71	AC Ex
ENSG00000169288	1.15988e-75	0.840376	0.132	0.023	1.27702e-71	AC Ex
ENSG00000135426	1.52702e-75	0.766277	0.279	0.1	1.68124e-71	AC Ex
ENSG00000241058	3.31536e-75	0.812213	0.198	0.054	3.65021e-71	AC Ex
ENSG00000160145	4.8771e-75	0.758751	0.369	0.168	5.36969e-71	AC Ex
ENSG00000198625	6.42933e-75	0.787261	0.17	0.039	7.0787e-71	AC Ex
ENSG00000124783	8.57391e-75	0.826554	0.175	0.042	9.43987e-71	AC Ex
ENSG00000196776	1.45382e-74	0.843337	0.257	0.089	1.60066e-70	AC Ex
ENSG00000107518	1.54396e-74	0.80915	0.125	0.02	1.6999e-70	AC Ex
ENSG00000164466	2.23808e-74	0.774932	0.154	0.032	2.46413e-70	AC Ex
ENSG00000197106	2.44857e-74	-0.988739	0.125	0.359	2.69588e-70	AC Ex
ENSG00000126351	2.77541e-74	0.818337	0.16	0.036	3.05572e-70	AC Ex
ENSG00000204681	2.46319e-73	-0.894641	0.182	0.416	2.71197e-69	AC Ex
ENSG00000010244	3.26931e-73	0.753085	0.206	0.059	3.59951e-69	AC Ex
ENSG00000166847	4.57704e-73	0.818491	0.15	0.031	5.03932e-69	AC Ex
ENSG00000075711	7.98824e-73	0.742506	0.276	0.101	8.79505e-69	AC Ex
ENSG00000172667	1.75592e-72	0.880627	0.163	0.038	1.93327e-68	AC Ex
ENSG00000137871	3.2092e-72	0.693632	0.13	0.023	3.53333e-68	AC Ex
ENSG00000078674	5.37599e-72	0.745756	0.289	0.11	5.91897e-68	AC Ex
ENSG00000147454	7.22782e-72	0.708519	0.257	0.088	7.95783e-68	AC Ex
ENSG00000089280	1.52137e-71	0.733788	0.337	0.144	1.67502e-67	AC Ex
ENSG00000038358	1.89043e-71	-1.38063	0.001	0.169	2.08136e-67	AC Ex
ENSG00000117616	5.42754e-71	0.71922	0.322	0.134	5.97572e-67	AC Ex
ENSG00000090615	6.30913e-71	0.799224	0.101	0.012	6.94635e-67	AC Ex
ENSG00000198682	7.12907e-71	-1.48211	0.01	0.183	7.84911e-67	AC Ex
ENSG00000088179	1.88959e-70	0.766218	0.15	0.032	2.08044e-66	AC Ex
ENSG00000078114	2.08754e-70	0.747904	0.103	0.013	2.29838e-66	AC Ex
ENSG00000131773	3.50754e-70	0.822842	0.266	0.1	3.86181e-66	AC Ex
ENSG00000112290	3.62444e-70	0.839822	0.253	0.092	3.99051e-66	AC Ex
ENSG00000124507	4.17862e-70	-1.04605	0.1	0.311	4.60066e-66	AC Ex
ENSG00000184009	7.38473e-70	-0.729098	0.341	0.553	8.13059e-66	AC Ex
ENSG00000196233	7.76017e-70	0.732124	0.132	0.025	8.54394e-66	AC Ex
ENSG00000134318	9.11301e-70	0.710805	0.225	0.071	1.00334e-65	AC Ex
ENSG00000168959	1.04237e-69	0.799592	0.152	0.034	1.14765e-65	AC Ex
ENSG00000101654	1.09052e-69	-0.823871	0.228	0.453	1.20066e-65	AC Ex
ENSG00000133302	1.23207e-69	0.711611	0.203	0.059	1.35651e-65	AC Ex
ENSG00000101290	1.83946e-69	0.717518	0.101	0.013	2.02525e-65	AC Ex
ENSG00000055163	7.44599e-69	-0.80149	0.229	0.458	8.19804e-65	AC Ex
ENSG00000094916	1.85238e-68	0.858265	0.128	0.024	2.03947e-64	AC Ex
ENSG00000101210	1.67261e-67	0.889567	0.149	0.034	1.84154e-63	AC Ex
ENSG00000072071	2.30463e-67	-0.831899	0.226	0.444	2.5374e-63	AC Ex
ENSG00000119688	2.67371e-67	0.717819	0.142	0.03	2.94376e-63	AC Ex
ENSG00000167522	4.50955e-67	-0.846369	0.256	0.466	4.96501e-63	AC Ex
ENSG00000185716	1.84617e-66	0.765228	0.2	0.061	2.03263e-62	AC Ex
ENSG00000155886	7.77379e-66	0.784305	0.109	0.017	8.55894e-62	AC Ex
ENSG00000172260	8.15535e-66	0.787416	0.206	0.065	8.97904e-62	AC Ex
ENSG00000162981	9.66797e-66	0.783998	0.17	0.045	1.06444e-61	AC Ex
ENSG00000173320	3.7576e-65	0.719415	0.123	0.023	4.13712e-61	AC Ex
ENSG00000143156	1.59363e-64	-1.28678	0.042	0.221	1.75459e-60	AC Ex
ENSG00000196683	1.61267e-64	0.819623	0.199	0.063	1.77555e-60	AC Ex
ENSG00000123358	1.8664e-64	-1.32052	0.032	0.207	2.05491e-60	AC Ex
ENSG00000165802	9.93719e-64	-0.791471	0.232	0.455	1.09408e-59	AC Ex
ENSG00000176204	1.06742e-63	0.724102	0.11	0.018	1.17523e-59	AC Ex
ENSG00000129990	2.10194e-63	-0.933591	0.162	0.364	2.31423e-59	AC Ex
ENSG00000146352	2.81954e-63	0.736051	0.104	0.016	3.10432e-59	AC Ex
ENSG00000170091	3.86647e-63	-0.788405	0.269	0.47	4.25698e-59	AC Ex
ENSG00000164076	4.84714e-63	-0.718804	0.291	0.499	5.3367e-59	AC Ex
ENSG00000138757	8.887e-63	0.85824	0.241	0.091	9.78459e-59	AC Ex
ENSG00000106460	9.21653e-63	0.763962	0.153	0.038	1.01474e-58	AC Ex
ENSG00000100647	1.54601e-61	-1.2286	0.027	0.193	1.70216e-57	AC Ex
ENSG00000179912	1.61894e-61	0.71755	0.123	0.025	1.78245e-57	AC Ex
ENSG00000055917	2.55414e-61	0.726834	0.112	0.02	2.81211e-57	AC Ex
ENSG00000119866	3.69206e-61	0.731129	0.283	0.118	4.06496e-57	AC Ex
ENSG00000151690	5.76791e-61	0.733678	0.114	0.021	6.35047e-57	AC Ex
ENSG00000196876	1.45424e-60	0.73122	0.191	0.06	1.60112e-56	AC Ex
ENSG00000151834	2.12035e-60	0.705119	0.184	0.056	2.3345e-56	AC Ex
ENSG00000052795	2.78956e-60	0.78543	0.18	0.054	3.0713e-56	AC Ex
ENSG00000132872	3.40541e-60	-0.742648	0.192	0.411	3.74935e-56	AC Ex
ENSG00000185615	3.88781e-60	0.714923	0.142	0.034	4.28048e-56	AC Ex
ENSG00000139182	7.80855e-60	-0.822284	0.167	0.374	8.59721e-56	AC Ex
ENSG00000185787	1.48559e-59	0.847864	0.236	0.092	1.63563e-55	AC Ex
ENSG00000119396	4.21708e-59	0.747147	0.128	0.028	4.643e-55	AC Ex
ENSG00000154723	6.89004e-59	0.724732	0.184	0.058	7.58594e-55	AC Ex
ENSG00000147676	2.80472e-58	0.890539	0.16	0.046	3.08799e-54	AC Ex
ENSG00000134243	7.19237e-58	0.799952	0.203	0.071	7.9188e-54	AC Ex
ENSG00000103034	9.48648e-58	-0.793424	0.259	0.453	1.04446e-53	AC Ex
ENSG00000164187	9.99519e-58	0.853683	0.14	0.036	1.10047e-53	AC Ex
ENSG00000147416	1.34962e-57	-0.695042	0.218	0.434	1.48593e-53	AC Ex
ENSG00000166598	2.34733e-57	0.833849	0.251	0.105	2.58441e-53	AC Ex
ENSG00000106829	2.424e-57	-1.32515	0.074	0.248	2.66882e-53	AC Ex
ENSG00000110931	3.51513e-57	-0.863449	0.19	0.383	3.87016e-53	AC Ex
ENSG00000167642	3.80819e-57	0.820236	0.218	0.081	4.19282e-53	AC Ex
ENSG00000105127	5.58441e-57	-1.2304	0.027	0.183	6.14844e-53	AC Ex
ENSG00000117600	9.07918e-57	-0.926008	0.123	0.312	9.99617e-53	AC Ex
ENSG00000241360	1.13334e-56	-1.22253	0.004	0.142	1.24781e-52	AC Ex
ENSG00000132932	1.68785e-56	0.698165	0.12	0.026	1.85833e-52	AC Ex
ENSG00000109971	5.65757e-56	-0.995465	0.092	0.269	6.22898e-52	AC Ex
ENSG00000184613	2.89064e-55	0.743349	0.278	0.123	3.18259e-51	AC Ex
ENSG00000150995	3.21739e-55	0.760784	0.279	0.125	3.54235e-51	AC Ex
ENSG00000134030	6.68052e-55	0.878887	0.123	0.029	7.35525e-51	AC Ex
ENSG00000196323	9.5313e-55	0.749272	0.126	0.03	1.0494e-50	AC Ex
ENSG00000143376	3.86638e-54	0.702441	0.107	0.021	4.25689e-50	AC Ex
ENSG00000146233	2.11322e-53	-1.218	0.001	0.129	2.32666e-49	AC Ex
ENSG00000152061	6.62074e-53	0.712632	0.125	0.03	7.28944e-49	AC Ex
ENSG00000006740	1.27882e-52	0.729602	0.125	0.031	1.40798e-48	AC Ex
ENSG00000160007	1.62742e-52	-0.817587	0.11	0.296	1.79179e-48	AC Ex
ENSG00000114853	7.0732e-52	-1.15261	0.003	0.13	7.78759e-48	AC Ex
ENSG00000136381	8.87947e-52	0.729634	0.123	0.03	9.77629e-48	AC Ex
ENSG00000165716	4.24861e-51	-1.05957	0.033	0.181	4.67772e-47	AC Ex
ENSG00000011083	4.7885e-51	-1.00264	0.094	0.263	5.27213e-47	AC Ex
ENSG00000004660	4.81032e-51	-0.728072	0.214	0.402	5.29617e-47	AC Ex
ENSG00000133612	5.00777e-51	0.698419	0.176	0.059	5.51356e-47	AC Ex
ENSG00000112320	8.58877e-51	-0.71128	0.228	0.417	9.45624e-47	AC Ex
ENSG00000124588	9.32423e-51	0.718208	0.162	0.051	1.0266e-46	AC Ex
ENSG00000104343	7.62425e-50	0.804161	0.115	0.028	8.3943e-46	AC Ex
ENSG00000167815	1.05306e-49	0.803448	0.216	0.088	1.15941e-45	AC Ex
ENSG00000128609	2.16743e-49	0.728432	0.141	0.041	2.38634e-45	AC Ex
ENSG00000186918	3.58246e-49	-0.962183	0.036	0.182	3.94429e-45	AC Ex
ENSG00000159409	4.68311e-49	-0.89604	0.1	0.267	5.1561e-45	AC Ex
ENSG00000065361	1.08881e-48	-1.09448	0.011	0.138	1.19878e-44	AC Ex
ENSG00000170345	1.68532e-48	-1.16655	0.029	0.169	1.85553e-44	AC Ex
ENSG00000166233	2.31956e-48	0.741115	0.113	0.027	2.55384e-44	AC Ex
ENSG00000177542	5.80134e-48	-0.842385	0.089	0.254	6.38727e-44	AC Ex
ENSG00000178719	7.5755e-48	-0.756303	0.148	0.327	8.34063e-44	AC Ex
ENSG00000189367	2.51816e-47	-1.0627	0.024	0.157	2.77249e-43	AC Ex
ENSG00000110367	3.67973e-47	0.768963	0.158	0.053	4.05139e-43	AC Ex
ENSG00000088538	4.73959e-47	-0.879753	0.137	0.304	5.21829e-43	AC Ex
ENSG00000139318	4.77807e-47	-1.09181	0.024	0.158	5.26066e-43	AC Ex
ENSG00000157837	7.35965e-47	0.821633	0.148	0.047	8.10297e-43	AC Ex
ENSG00000022355	1.75181e-46	0.706943	0.23	0.099	1.92875e-42	AC Ex
ENSG00000263020	2.92302e-46	-1.00479	0	0.111	3.21825e-42	AC Ex
ENSG00000196376	3.41393e-46	-0.95168	0.034	0.172	3.75874e-42	AC Ex
ENSG00000152377	4.03038e-46	0.798344	0.141	0.044	4.43744e-42	AC Ex
ENSG00000255154	6.10275e-46	-1.12141	0.001	0.112	6.71913e-42	AC Ex
ENSG00000083799	1.5651e-45	0.726234	0.141	0.044	1.72317e-41	AC Ex
ENSG00000132563	4.42469e-45	-0.769112	0.15	0.32	4.87158e-41	AC Ex
ENSG00000134686	9.39364e-45	-0.949789	0.047	0.187	1.03424e-40	AC Ex
ENSG00000100321	1.30717e-44	-0.845991	0.161	0.323	1.4392e-40	AC Ex
ENSG00000198840	2.45436e-44	0.740087	0.102	0.024	2.70225e-40	AC Ex
ENSG00000213760	2.56421e-44	0.765214	0.139	0.044	2.8232e-40	AC Ex
ENSG00000130222	5.93253e-44	-1.38864	0.02	0.141	6.53172e-40	AC Ex
ENSG00000135437	1.3748e-43	-0.954354	0.005	0.114	1.51366e-39	AC Ex
ENSG00000160469	2.26842e-43	-0.866655	0.15	0.306	2.49754e-39	AC Ex
ENSG00000132294	5.77566e-43	-0.799774	0.116	0.277	6.359e-39	AC Ex
ENSG00000197852	1.15155e-42	-1.00906	0.001	0.104	1.26785e-38	AC Ex
ENSG00000072832	1.34668e-41	-0.736373	0.12	0.28	1.48269e-37	AC Ex
ENSG00000010818	4.16449e-41	-0.819407	0.104	0.254	4.5851e-37	AC Ex
ENSG00000107105	5.579e-41	-0.895469	0.077	0.22	6.14248e-37	AC Ex
ENSG00000172915	6.6159e-41	-0.727625	0.187	0.348	7.28411e-37	AC Ex
ENSG00000174996	2.02547e-40	-0.789558	0.085	0.233	2.23005e-36	AC Ex
ENSG00000137942	2.05023e-40	-0.872349	0.024	0.143	2.2573e-36	AC Ex
ENSG00000132640	7.72125e-40	0.735997	0.107	0.03	8.5011e-36	AC Ex
ENSG00000082641	2.2231e-39	-0.717525	0.122	0.276	2.44764e-35	AC Ex
ENSG00000108551	1.52385e-38	0.718532	0.184	0.077	1.67776e-34	AC Ex
ENSG00000169085	1.58934e-38	-0.725808	0.152	0.304	1.74986e-34	AC Ex
ENSG00000136928	2.41627e-38	-0.726806	0.273	0.41	2.66032e-34	AC Ex
ENSG00000141522	3.08544e-38	-0.766125	0.07	0.207	3.39707e-34	AC Ex
ENSG00000084731	4.07191e-38	-0.837111	0.114	0.255	4.48317e-34	AC Ex
ENSG00000169727	4.70567e-38	-0.782103	0.076	0.214	5.18095e-34	AC Ex
ENSG00000125482	6.33162e-38	-0.92274	0.084	0.217	6.97111e-34	AC Ex
ENSG00000204316	4.87992e-37	-0.942215	0.021	0.129	5.3728e-33	AC Ex
ENSG00000244405	5.53113e-37	-0.710872	0.131	0.282	6.08977e-33	AC Ex
ENSG00000151612	8.59144e-37	-0.882785	0.095	0.228	9.45918e-33	AC Ex
ENSG00000237441	4.51991e-36	-0.898535	0.043	0.16	4.97643e-32	AC Ex
ENSG00000176095	5.85151e-36	-0.773654	0.09	0.224	6.44251e-32	AC Ex
ENSG00000089199	6.98641e-36	-0.761918	0.07	0.201	7.69204e-32	AC Ex
ENSG00000114650	8.04228e-35	-0.75304	0.087	0.218	8.85455e-31	AC Ex
ENSG00000174576	1.22663e-34	-1.13005	0.03	0.138	1.35052e-30	AC Ex
ENSG00000169228	1.3108e-34	-0.924307	0.055	0.171	1.44319e-30	AC Ex
ENSG00000118046	1.38034e-34	-0.766508	0.051	0.171	1.51975e-30	AC Ex
ENSG00000197043	1.49894e-34	-0.693267	0.091	0.226	1.65034e-30	AC Ex
ENSG00000198910	4.31947e-34	-0.771084	0.091	0.22	4.75574e-30	AC Ex
ENSG00000113758	5.9658e-34	-0.769806	0.072	0.198	6.56834e-30	AC Ex
ENSG00000219200	6.63597e-34	-0.894433	0.018	0.115	7.30621e-30	AC Ex
ENSG00000107742	1.88948e-33	-0.76238	0.103	0.236	2.08032e-29	AC Ex
ENSG00000165023	3.20956e-33	-0.806452	0.135	0.269	3.53373e-29	AC Ex
ENSG00000128482	7.81028e-33	-0.774523	0.082	0.206	8.59912e-29	AC Ex
ENSG00000147535	8.59497e-33	-0.879673	0.033	0.136	9.46306e-29	AC Ex
ENSG00000117682	1.55093e-32	-0.919813	0.042	0.148	1.70757e-28	AC Ex
ENSG00000159363	1.58744e-32	-0.756346	0.138	0.268	1.74777e-28	AC Ex
ENSG00000106992	1.71798e-32	-0.819691	0.041	0.147	1.89149e-28	AC Ex
ENSG00000198822	4.42267e-32	-0.849931	0.032	0.134	4.86936e-28	AC Ex
ENSG00000128928	4.438e-32	-0.889986	0.058	0.17	4.88624e-28	AC Ex
ENSG00000213920	1.18928e-31	-0.843696	0.017	0.108	1.3094e-27	AC Ex
ENSG00000055483	2.40202e-31	-0.802173	0.069	0.185	2.64463e-27	AC Ex
ENSG00000127663	2.85131e-31	-0.791212	0.083	0.203	3.13929e-27	AC Ex
ENSG00000169714	3.99021e-31	0.728962	0.132	0.052	4.39322e-27	AC Ex
ENSG00000103549	4.14045e-31	-0.768797	0.045	0.153	4.55864e-27	AC Ex
ENSG00000198576	6.2237e-31	-1.22937	0.024	0.117	6.85229e-27	AC Ex
ENSG00000104093	2.50825e-30	-0.704668	0.105	0.228	2.76159e-26	AC Ex
ENSG00000172575	6.0472e-30	-0.822803	0.018	0.107	6.65797e-26	AC Ex
ENSG00000124225	6.37776e-30	-0.758885	0.026	0.12	7.02191e-26	AC Ex
ENSG00000101161	1.1472e-29	-0.718575	0.064	0.176	1.26307e-25	AC Ex
ENSG00000114867	1.4016e-29	-0.715932	0.052	0.159	1.54316e-25	AC Ex
ENSG00000117298	3.71219e-29	-0.775066	0.024	0.115	4.08712e-25	AC Ex
ENSG00000110786	4.22809e-29	-0.751752	0.159	0.279	4.65513e-25	AC Ex
ENSG00000106012	4.55672e-29	-0.842129	0.048	0.149	5.01694e-25	AC Ex
ENSG00000196653	1.67762e-28	-0.829341	0.021	0.107	1.84705e-24	AC Ex
ENSG00000167549	1.80995e-28	-0.705941	0.152	0.274	1.99276e-24	AC Ex
ENSG00000073670	2.15777e-28	-0.765048	0.113	0.23	2.37571e-24	AC Ex
ENSG00000120784	3.92376e-28	-0.821304	0.024	0.111	4.32006e-24	AC Ex
ENSG00000065243	4.26093e-28	-0.705419	0.102	0.217	4.69128e-24	AC Ex
ENSG00000111412	1.59017e-27	-0.727544	0.023	0.108	1.75078e-23	AC Ex
ENSG00000112640	2.33296e-27	-0.723903	0.036	0.13	2.56859e-23	AC Ex
ENSG00000166710	2.91708e-27	-1.14198	0.069	0.17	3.2117e-23	AC Ex
ENSG00000169925	1.22654e-26	-0.69593	0.068	0.173	1.35042e-22	AC Ex
ENSG00000150764	1.58815e-26	-0.730626	0.039	0.132	1.74855e-22	AC Ex
ENSG00000135315	1.99688e-26	-0.775984	0.045	0.138	2.19857e-22	AC Ex
ENSG00000107954	5.35991e-26	-0.715589	0.086	0.194	5.90126e-22	AC Ex
ENSG00000197444	1.03834e-25	-0.69523	0.071	0.173	1.14322e-21	AC Ex
ENSG00000125510	1.64142e-24	-0.735378	0.042	0.13	1.8072e-20	AC Ex
ENSG00000240972	1.65474e-24	-1.16381	0.072	0.164	1.82187e-20	AC Ex
ENSG00000177697	1.76138e-24	-0.72259	0.038	0.123	1.93928e-20	AC Ex
ENSG00000140326	1.57252e-23	-0.789651	0.028	0.105	1.73135e-19	AC Ex
ENSG00000167967	3.47602e-23	-0.693305	0.037	0.12	3.8271e-19	AC Ex
ENSG00000196792	4.42963e-23	-0.730487	0.037	0.118	4.87703e-19	AC Ex
ENSG00000215041	5.53101e-23	-0.695648	0.052	0.14	6.08964e-19	AC Ex
ENSG00000283154	9.11047e-23	-0.714604	0.032	0.11	1.00306e-18	AC Ex
ENSG00000107951	5.78641e-22	-0.724038	0.033	0.109	6.37084e-18	AC Ex
ENSG00000067836	1.13376e-21	-0.724012	0.1	0.192	1.24827e-17	AC Ex
ENSG00000134532	4.74354e-21	-0.708292	0.034	0.109	5.22264e-17	AC Ex
ENSG00000198804	3.81772e-20	-0.862406	0.124	0.232	4.20331e-16	AC Ex
ENSG00000063015	1.84967e-19	-0.726222	0.055	0.133	2.03649e-15	AC Ex
ENSG00000100417	4.91101e-18	-0.713606	0.046	0.116	5.40702e-14	AC Ex
ENSG00000107331	2.85951e-101	3.3893	0.474	0	3.14832e-97	AC In
ENSG00000168314	5.06717e-73	2.8056	0.388	0.011	5.57896e-69	AC In
ENSG00000167996	7.55306e-68	2.74483	0.374	0.013	8.31592e-64	AC In
ENSG00000137941	3.64473e-60	1.5246	0.659	0.172	4.01284e-56	AC In
ENSG00000181722	2.51455e-59	2.47727	0.335	0.013	2.76852e-55	AC In
ENSG00000187147	7.33669e-48	2.61171	0.235	0	8.0777e-44	AC In
ENSG00000178980	5.11939e-46	2.56157	0.226	0	5.63645e-42	AC In
ENSG00000163531	1.12593e-42	2.30475	0.241	0.008	1.23965e-38	AC In
ENSG00000167123	3.55204e-37	2.26866	0.218	0.01	3.91079e-33	AC In
ENSG00000182667	5.67614e-33	1.85579	0.221	0.017	6.24943e-29	AC In
ENSG00000112379	5.36426e-32	2.11986	0.168	0.002	5.90605e-28	AC In
ENSG00000100142	2.01074e-31	1.79501	0.203	0.013	2.21382e-27	AC In
ENSG00000100354	8.53165e-31	1.77999	0.206	0.015	9.39334e-27	AC In
ENSG00000244754	1.49154e-30	1.48511	0.285	0.046	1.64218e-26	AC In
ENSG00000070214	8.94056e-29	1.14205	0.406	0.111	9.84355e-25	AC In
ENSG00000135924	2.14356e-28	1.78944	0.212	0.023	2.36006e-24	AC In
ENSG00000171858	4.62871e-28	2.15971	0.138	0	5.09621e-24	AC In
ENSG00000105695	3.08511e-27	-1.57334	0.162	0.464	3.39671e-23	AC In
ENSG00000146592	6.80442e-27	2.10666	0.132	0	7.49167e-23	AC In
ENSG00000169554	6.46371e-26	1.39328	0.285	0.061	7.11655e-22	AC In
ENSG00000175161	6.69739e-26	1.9006	0.132	0.001	7.37383e-22	AC In
ENSG00000124406	2.35241e-24	1.80905	0.165	0.013	2.59e-20	AC In
ENSG00000203485	2.06048e-23	1.91587	0.115	0	2.26858e-19	AC In
ENSG00000015592	7.43862e-23	-1.6029	0.115	0.389	8.18992e-19	AC In
ENSG00000197971	1.11303e-22	0.771369	0.624	0.302	1.22545e-18	AC In
ENSG00000163539	1.90266e-22	1.41153	0.185	0.024	2.09483e-18	AC In
ENSG00000131584	2.12941e-22	1.7842	0.115	0.001	2.34448e-18	AC In
ENSG00000163682	7.2296e-22	1.82472	0.129	0.006	7.95979e-18	AC In
ENSG00000176463	5.38929e-21	1.82721	0.112	0.002	5.93361e-17	AC In
ENSG00000198938	1.55733e-20	-1.84718	0.159	0.399	1.71462e-16	AC In
ENSG00000107863	6.53195e-20	1.23052	0.197	0.033	7.19167e-16	AC In
ENSG00000089041	8.83338e-20	1.32579	0.194	0.033	9.72555e-16	AC In
ENSG00000071082	1.10102e-19	1.57182	0.156	0.019	1.21223e-15	AC In
ENSG00000134851	4.58788e-19	1.03743	0.218	0.044	5.05126e-15	AC In
ENSG00000026652	1.56675e-17	1.51817	0.103	0.005	1.72499e-13	AC In
ENSG00000136238	2.3221e-17	1.51488	0.106	0.006	2.55664e-13	AC In
ENSG00000232112	5.83682e-17	1.47493	0.112	0.008	6.42634e-13	AC In
ENSG00000151150	5.85431e-17	1.00868	0.224	0.056	6.44559e-13	AC In
ENSG00000071054	8.35091e-17	0.99114	0.276	0.088	9.19435e-13	AC In
ENSG00000143153	8.58489e-17	1.09148	0.235	0.064	9.45197e-13	AC In
ENSG00000127483	1.10877e-16	1.07806	0.244	0.068	1.22075e-12	AC In
ENSG00000153707	1.11479e-16	1.33667	0.138	0.018	1.22739e-12	AC In
ENSG00000106772	1.81727e-16	1.37556	0.106	0.007	2.00081e-12	AC In
ENSG00000165795	3.04301e-16	0.926626	0.268	0.081	3.35035e-12	AC In
ENSG00000135525	3.17495e-16	1.03386	0.221	0.056	3.49562e-12	AC In
ENSG00000196187	7.40863e-16	0.992919	0.197	0.045	8.15691e-12	AC In
ENSG00000121653	1.05411e-15	1.35989	0.118	0.013	1.16057e-11	AC In
ENSG00000104904	1.33147e-15	1.27705	0.112	0.011	1.46595e-11	AC In
ENSG00000090863	4.04061e-15	1.32814	0.106	0.01	4.44871e-11	AC In
ENSG00000198712	1.48844e-14	-1.46327	0.176	0.367	1.63877e-10	AC In
ENSG00000010244	1.56881e-14	1.32468	0.112	0.013	1.72727e-10	AC In
ENSG00000165566	1.69542e-14	0.710445	0.324	0.124	1.86666e-10	AC In
ENSG00000085117	1.74667e-14	1.16972	0.176	0.042	1.92308e-10	AC In
ENSG00000155886	4.331e-14	1.30215	0.103	0.011	4.76844e-10	AC In
ENSG00000164124	6.62618e-14	0.7292	0.297	0.107	7.29542e-10	AC In
ENSG00000054523	1.48821e-13	0.839039	0.168	0.038	1.63852e-09	AC In
ENSG00000244274	1.49389e-13	-2.40977	0.003	0.15	1.64477e-09	AC In
ENSG00000107902	1.83728e-13	1.24057	0.124	0.02	2.02285e-09	AC In
ENSG00000104833	1.93951e-13	-1.21722	0.124	0.319	2.13541e-09	AC In
ENSG00000258643	4.52975e-13	-2.36958	0	0.139	4.98725e-09	AC In
ENSG00000012124	8.77511e-13	1.18346	0.109	0.015	9.6614e-09	AC In
ENSG00000168297	8.88458e-13	0.987927	0.132	0.025	9.78193e-09	AC In
ENSG00000150656	1.16413e-12	0.912143	0.132	0.025	1.2817e-08	AC In
ENSG00000167641	1.68076e-12	-1.02327	0.224	0.403	1.85052e-08	AC In
ENSG00000165959	2.0764e-12	1.091	0.124	0.023	2.28612e-08	AC In
ENSG00000130294	2.34847e-12	1.09887	0.121	0.021	2.58567e-08	AC In
ENSG00000165175	4.43244e-12	1.15348	0.121	0.023	4.88011e-08	AC In
ENSG00000092964	6.38854e-12	-1.10576	0.212	0.378	7.03378e-08	AC In
ENSG00000106261	7.15329e-12	1.11267	0.106	0.017	7.87578e-08	AC In
ENSG00000198804	9.97504e-12	-1.85598	0.071	0.23	1.09825e-07	AC In
ENSG00000049618	1.1783e-11	0.91524	0.121	0.023	1.29731e-07	AC In
ENSG00000089280	1.80298e-11	1.09567	0.141	0.035	1.98508e-07	AC In
ENSG00000139910	3.53828e-11	0.829443	0.168	0.048	3.89564e-07	AC In
ENSG00000198886	3.85737e-11	-1.41547	0.159	0.311	4.24697e-07	AC In
ENSG00000132718	3.9787e-11	1.11536	0.112	0.021	4.38055e-07	AC In
ENSG00000142192	6.17938e-11	0.783495	0.259	0.106	6.80349e-07	AC In
ENSG00000075711	1.13057e-10	0.789788	0.179	0.056	1.24475e-06	AC In
ENSG00000078269	2.13207e-10	1.09491	0.115	0.025	2.34741e-06	AC In
ENSG00000196323	2.5239e-10	0.953144	0.103	0.019	2.77881e-06	AC In
ENSG00000105290	3.74295e-10	-0.743606	0.415	0.513	4.12099e-06	AC In
ENSG00000139746	5.98952e-10	1.0636	0.112	0.025	6.59446e-06	AC In
ENSG00000107281	7.23466e-10	1.03854	0.109	0.024	7.96536e-06	AC In
ENSG00000169020	1.15371e-09	0.856521	0.218	0.088	1.27024e-05	AC In
ENSG00000136541	1.65379e-09	0.7463	0.162	0.052	1.82082e-05	AC In
ENSG00000134294	7.58525e-09	0.758556	0.153	0.049	8.35136e-05	AC In
ENSG00000149311	2.1927e-08	0.889118	0.126	0.038	0.000241417	AC In
ENSG00000102934	1.1739e-07	-1.07823	0.115	0.236	0.00129246	AC In
ENSG00000064607	1.24203e-07	0.744329	0.129	0.043	0.00136747	AC In
ENSG00000168481	1.85514e-07	-1.24641	0.068	0.18	0.0020425	AC In
ENSG00000179403	3.14665e-07	0.818551	0.118	0.038	0.00346446	AC In
ENSG00000187957	5.78159e-07	0.793527	0.103	0.031	0.00636553	AC In
ENSG00000166963	1.46983e-06	-1.19292	0.085	0.188	0.0161828	AC In
ENSG00000116133	1.47413e-06	-0.811766	0.176	0.292	0.0162301	AC In
ENSG00000204580	2.07221e-06	-1.099	0.059	0.157	0.0228151	AC In
ENSG00000167755	6.44179e-06	-1.29236	0.038	0.122	0.0709241	AC In
ENSG00000047365	1.99888e-05	-1.04996	0.094	0.182	0.220077	AC In
ENSG00000065809	2.71444e-05	-0.901559	0.106	0.197	0.29886	AC In
ENSG00000204655	2.93092e-05	-0.783944	0.194	0.284	0.322694	AC In
ENSG00000174607	3.0709e-05	-0.850566	0.1	0.192	0.338106	AC In
ENSG00000090097	3.67289e-05	-0.885587	0.085	0.173	0.404385	AC In
ENSG00000139737	3.71292e-05	-1.02029	0.074	0.157	0.408792	AC In
ENSG00000159176	4.74042e-05	-0.825987	0.121	0.209	0.52192	AC In
ENSG00000134186	6.6116e-05	-0.988335	0.044	0.118	0.727937	AC In
ENSG00000104419	6.91356e-05	-0.699914	0.188	0.279	0.761183	AC In
ENSG00000141540	0.000145044	-0.85823	0.15	0.23	1	AC In
ENSG00000084207	0.000157915	-1.08811	0.041	0.107	1	AC In
ENSG00000143702	0.000170011	-1.06066	0.041	0.107	1	AC In
ENSG00000184009	0.000170681	-0.763286	0.106	0.19	1	AC In
ENSG00000104888	0.000217267	-0.933837	0.068	0.141	1	AC In
ENSG00000203879	0.000354946	-0.734696	0.112	0.19	1	AC In
ENSG00000117632	0.000425753	-0.782346	0.126	0.204	1	AC In
ENSG00000198822	0.00111543	-0.885011	0.056	0.116	1	AC In
ENSG00000089737	0.00165831	-0.752535	0.103	0.168	1	AC In
ENSG00000198899	0.00308129	-0.861553	0.115	0.172	1	AC In
ENSG00000117523	0.00434319	-0.730981	0.088	0.144	1	AC In
ENSG00000180776	0.00479553	-0.816456	0.068	0.119	1	AC In
ENSG00000144674	0.0108459	-0.812765	0.068	0.112	1	AC In
ENSG00000124422	0.0170203	-0.693549	0.079	0.123	1	AC In
ENSG00000170775	0.0199029	-0.721617	0.147	0.187	1	AC In
ENSG00000101489	0	2.71102	0.438	0.002	0	AC Ast
ENSG00000148053	0	2.66883	0.413	0.002	0	AC Ast
ENSG00000188042	0	2.42653	0.343	0	0	AC Ast
ENSG00000167996	6.09841e-297	2.2392	0.334	0.007	6.71435e-293	AC Ast
ENSG00000100354	3.4347e-285	1.85939	0.405	0.045	3.7816e-281	AC Ast
ENSG00000168000	6.57582e-262	-2.47469	0.007	0.364	7.23997e-258	AC Ast
ENSG00000178568	3.39408e-259	2.13862	0.3	0.008	3.73688e-255	AC Ast
ENSG00000258643	5.06488e-252	-2.50574	0	0.34	5.57643e-248	AC Ast
ENSG00000171867	5.77289e-251	1.28857	0.56	0.161	6.35595e-247	AC Ast
ENSG00000185883	9.11937e-237	-2.74291	0	0.324	1.00404e-232	AC Ast
ENSG00000240694	4.31933e-232	2.02852	0.268	0.006	4.75559e-228	AC Ast
ENSG00000184702	4.19274e-221	-2.39981	0	0.306	4.61621e-217	AC Ast
ENSG00000139970	2.44906e-212	1.44022	0.367	0.058	2.69642e-208	AC Ast
ENSG00000185565	1.656e-198	1.74944	0.292	0.031	1.82326e-194	AC Ast
ENSG00000077264	4.3286e-197	1.75021	0.273	0.022	4.76579e-193	AC Ast
ENSG00000260230	3.75799e-192	1.81803	0.225	0.005	4.13755e-188	AC Ast
ENSG00000175161	3.3921e-189	1.77004	0.248	0.015	3.7347e-185	AC Ast
ENSG00000187109	2.53652e-186	1.79594	0.229	0.009	2.79271e-182	AC Ast
ENSG00000145864	2.80764e-184	1.17343	0.436	0.119	3.09121e-180	AC Ast
ENSG00000182389	7.61678e-182	1.81598	0.218	0.006	8.38607e-178	AC Ast
ENSG00000186310	3.15339e-175	1.71565	0.241	0.018	3.47188e-171	AC Ast
ENSG00000178980	1.21323e-174	1.80107	0.197	0.001	1.33576e-170	AC Ast
ENSG00000166501	6.2068e-174	1.92659	0.197	0.001	6.83368e-170	AC Ast
ENSG00000178662	7.64859e-173	1.81891	0.206	0.005	8.42109e-169	AC Ast
ENSG00000021645	6.45132e-171	1.47176	0.304	0.05	7.10291e-167	AC Ast
ENSG00000182667	8.89676e-168	1.54135	0.321	0.063	9.79534e-164	AC Ast
ENSG00000115977	8.4249e-165	1.14671	0.34	0.068	9.27582e-161	AC Ast
ENSG00000153707	3.92846e-164	1.56342	0.244	0.023	4.32523e-160	AC Ast
ENSG00000147481	1.42637e-163	1.72701	0.199	0.006	1.57043e-159	AC Ast
ENSG00000145495	1.50605e-162	1.54349	0.25	0.027	1.65816e-158	AC Ast
ENSG00000136238	2.223e-157	1.66711	0.201	0.009	2.44752e-153	AC Ast
ENSG00000049618	1.67113e-145	1.37816	0.246	0.034	1.83991e-141	AC Ast
ENSG00000196220	2.23135e-143	1.56565	0.178	0.006	2.45672e-139	AC Ast
ENSG00000163531	1.32607e-141	1.65824	0.167	0.003	1.46e-137	AC Ast
ENSG00000187957	4.26431e-140	1.17284	0.366	0.108	4.695e-136	AC Ast
ENSG00000131584	1.06523e-139	1.70162	0.16	0.001	1.17282e-135	AC Ast
ENSG00000166619	3.40293e-136	1.64475	0.154	0	3.74662e-132	AC Ast
ENSG00000011052	1.60848e-135	-1.87687	0	0.198	1.77094e-131	AC Ast
ENSG00000156052	6.68813e-135	1.6139	0.152	0	7.36363e-131	AC Ast
ENSG00000152932	3.09753e-133	1.58573	0.195	0.017	3.41038e-129	AC Ast
ENSG00000089737	3.82786e-132	-1.06558	0.251	0.518	4.21447e-128	AC Ast
ENSG00000111371	3.34602e-130	1.56012	0.162	0.005	3.68396e-126	AC Ast
ENSG00000007237	3.40215e-130	1.56113	0.158	0.004	3.74576e-126	AC Ast
ENSG00000143153	1.09089e-129	0.758192	0.618	0.349	1.20107e-125	AC Ast
ENSG00000163682	1.30891e-127	1.47304	0.159	0.005	1.44111e-123	AC Ast
ENSG00000078018	6.60159e-123	0.969708	0.358	0.11	7.26835e-119	AC Ast
ENSG00000153944	4.32767e-122	1.46688	0.158	0.007	4.76476e-118	AC Ast
ENSG00000169554	3.64278e-118	1.08869	0.308	0.085	4.0107e-114	AC Ast
ENSG00000162989	5.02351e-118	1.44343	0.144	0.003	5.53088e-114	AC Ast
ENSG00000251503	1.11885e-116	-1.99856	0.001	0.176	1.23186e-112	AC Ast
ENSG00000117707	5.90674e-116	1.48983	0.137	0.002	6.50332e-112	AC Ast
ENSG00000152578	1.27316e-115	1.36383	0.22	0.038	1.40175e-111	AC Ast
ENSG00000256500	3.20994e-114	-1.87196	0	0.169	3.53415e-110	AC Ast
ENSG00000102466	2.27581e-113	1.40264	0.136	0.002	2.50567e-109	AC Ast
ENSG00000244588	2.9908e-113	-1.78211	0	0.168	3.29287e-109	AC Ast
ENSG00000087460	3.5472e-113	0.734032	0.569	0.285	3.90546e-109	AC Ast
ENSG00000172292	4.56069e-112	1.44734	0.128	0	5.02132e-108	AC Ast
ENSG00000008056	7.76458e-110	1.26021	0.219	0.04	8.54881e-106	AC Ast
ENSG00000166710	1.2287e-106	-1.82105	0.095	0.302	1.3528e-102	AC Ast
ENSG00000156113	2.10003e-106	1.2907	0.185	0.026	2.31213e-102	AC Ast
ENSG00000156642	8.88714e-106	1.2305	0.202	0.034	9.78474e-102	AC Ast
ENSG00000114279	1.70946e-105	1.35797	0.15	0.011	1.88211e-101	AC Ast
ENSG00000091592	2.66467e-104	1.41609	0.119	0	2.93381e-100	AC Ast
ENSG00000152377	8.48886e-103	1.21628	0.244	0.059	9.34623e-99	AC Ast
ENSG00000162065	4.28542e-102	-1.44625	0.061	0.261	4.71824e-98	AC Ast
ENSG00000197872	1.00418e-100	1.2828	0.157	0.015	1.1056e-96	AC Ast
ENSG00000104290	1.19774e-98	1.30099	0.161	0.019	1.31872e-94	AC Ast
ENSG00000181722	1.15298e-97	1.49525	0.142	0.011	1.26943e-93	AC Ast
ENSG00000105993	1.17634e-96	1.32791	0.145	0.013	1.29515e-92	AC Ast
ENSG00000119820	1.8622e-96	1.31816	0.11	0	2.05028e-92	AC Ast
ENSG00000100077	1.36443e-95	1.25293	0.129	0.007	1.50223e-91	AC Ast
ENSG00000163328	7.32573e-95	1.02907	0.195	0.036	8.06563e-91	AC Ast
ENSG00000142235	9.92743e-95	1.37446	0.109	0	1.09301e-90	AC Ast
ENSG00000132718	1.65986e-94	0.871835	0.27	0.076	1.82751e-90	AC Ast
ENSG00000157064	3.00933e-94	1.2734	0.111	0.001	3.31327e-90	AC Ast
ENSG00000157542	1.56224e-93	1.34374	0.119	0.004	1.72003e-89	AC Ast
ENSG00000140538	1.62035e-93	0.951123	0.277	0.084	1.784e-89	AC Ast
ENSG00000176165	5.31068e-93	1.29187	0.111	0.001	5.84706e-89	AC Ast
ENSG00000148408	3.83465e-92	1.25799	0.121	0.005	4.22195e-88	AC Ast
ENSG00000157005	1.70285e-91	-2.25056	0.09	0.28	1.87484e-87	AC Ast
ENSG00000004059	9.09003e-91	-1.4237	0.041	0.213	1.00081e-86	AC Ast
ENSG00000110427	1.00285e-90	1.26053	0.132	0.01	1.10414e-86	AC Ast
ENSG00000165152	1.1544e-90	1.21519	0.115	0.004	1.271e-86	AC Ast
ENSG00000112379	1.16714e-89	1.18154	0.144	0.015	1.28502e-85	AC Ast
ENSG00000162409	5.70813e-89	1.30602	0.119	0.006	6.28465e-85	AC Ast
ENSG00000135924	6.43265e-89	1.04762	0.201	0.043	7.08234e-85	AC Ast
ENSG00000118473	2.09763e-85	1.26963	0.121	0.008	2.30949e-81	AC Ast
ENSG00000145990	2.67748e-84	1.19148	0.105	0.003	2.9479e-80	AC Ast
ENSG00000151067	7.99625e-84	1.20717	0.103	0.002	8.80388e-80	AC Ast
ENSG00000155093	3.91752e-83	1.13198	0.115	0.007	4.31319e-79	AC Ast
ENSG00000150471	5.63208e-83	1.24014	0.11	0.005	6.20092e-79	AC Ast
ENSG00000143156	1.09525e-82	-1.52691	0.016	0.16	1.20587e-78	AC Ast
ENSG00000196090	1.40713e-82	1.28616	0.102	0.002	1.54925e-78	AC Ast
ENSG00000090863	1.76143e-82	1.04728	0.182	0.038	1.93934e-78	AC Ast
ENSG00000219200	1.88007e-82	-1.50964	0.003	0.132	2.06996e-78	AC Ast
ENSG00000075043	2.57481e-82	1.26811	0.109	0.005	2.83486e-78	AC Ast
ENSG00000206579	3.70248e-82	1.22924	0.108	0.005	4.07643e-78	AC Ast
ENSG00000136942	1.18879e-81	-1.08224	0.202	0.398	1.30886e-77	AC Ast
ENSG00000005108	2.56116e-81	1.12852	0.173	0.034	2.81983e-77	AC Ast
ENSG00000133083	1.29822e-80	1.03142	0.177	0.036	1.42934e-76	AC Ast
ENSG00000104904	1.87391e-80	0.974862	0.199	0.049	2.06317e-76	AC Ast
ENSG00000155886	1.11458e-79	1.20249	0.119	0.01	1.22715e-75	AC Ast
ENSG00000173320	1.17639e-79	1.17865	0.12	0.01	1.29521e-75	AC Ast
ENSG00000114631	5.67551e-79	0.860582	0.27	0.092	6.24874e-75	AC Ast
ENSG00000177511	3.48996e-77	1.11536	0.124	0.013	3.84245e-73	AC Ast
ENSG00000106460	4.94426e-77	1.10526	0.146	0.023	5.44363e-73	AC Ast
ENSG00000175893	5.23515e-77	1.12303	0.118	0.011	5.7639e-73	AC Ast
ENSG00000185787	7.22363e-76	1.00988	0.219	0.065	7.95321e-72	AC Ast
ENSG00000244754	3.47768e-75	0.766263	0.294	0.111	3.82893e-71	AC Ast
ENSG00000022355	2.73586e-74	0.780457	0.307	0.122	3.01218e-70	AC Ast
ENSG00000107863	2.48783e-73	0.982404	0.149	0.026	2.7391e-69	AC Ast
ENSG00000105649	4.04689e-73	-1.01854	0.125	0.304	4.45562e-69	AC Ast
ENSG00000184009	1.86198e-72	-0.831975	0.226	0.416	2.05004e-68	AC Ast
ENSG00000178104	1.53363e-71	1.09085	0.119	0.014	1.68853e-67	AC Ast
ENSG00000106123	2.47149e-71	-0.953708	0.102	0.281	2.72111e-67	AC Ast
ENSG00000126070	1.00367e-69	1.09099	0.118	0.014	1.10504e-65	AC Ast
ENSG00000163539	2.00989e-69	0.968647	0.175	0.043	2.21289e-65	AC Ast
ENSG00000168959	3.8988e-69	1.12054	0.125	0.018	4.29257e-65	AC Ast
ENSG00000135525	4.24772e-69	0.917018	0.149	0.029	4.67674e-65	AC Ast
ENSG00000035862	1.39754e-68	0.864368	0.177	0.044	1.53869e-64	AC Ast
ENSG00000277363	1.56881e-68	0.757484	0.245	0.085	1.72726e-64	AC Ast
ENSG00000149187	3.17105e-67	-0.820348	0.203	0.389	3.49132e-63	AC Ast
ENSG00000183775	3.53842e-67	1.04358	0.149	0.031	3.8958e-63	AC Ast
ENSG00000114853	1.76837e-66	-1.35438	0.004	0.111	1.94697e-62	AC Ast
ENSG00000171617	2.71552e-66	1.05023	0.168	0.042	2.98979e-62	AC Ast
ENSG00000127328	4.39654e-66	0.942004	0.167	0.04	4.84059e-62	AC Ast
ENSG00000112697	5.2717e-66	1.05802	0.145	0.03	5.80414e-62	AC Ast
ENSG00000196233	1.42107e-65	1.05922	0.105	0.011	1.5646e-61	AC Ast
ENSG00000094916	4.89603e-64	1.05791	0.124	0.02	5.39053e-60	AC Ast
ENSG00000213639	5.74939e-64	1.08526	0.119	0.018	6.33007e-60	AC Ast
ENSG00000152767	1.67614e-62	1.03974	0.112	0.016	1.84543e-58	AC Ast
ENSG00000148948	6.94654e-62	0.796385	0.204	0.065	7.64814e-58	AC Ast
ENSG00000166848	8.93414e-62	0.878643	0.2	0.065	9.83649e-58	AC Ast
ENSG00000240972	1.79266e-61	-1.3293	0.058	0.194	1.97372e-57	AC Ast
ENSG00000164919	4.75589e-61	-1.15076	0.098	0.249	5.23623e-57	AC Ast
ENSG00000132024	4.98568e-60	0.984465	0.102	0.012	5.48923e-56	AC Ast
ENSG00000241360	1.37896e-59	-1.17817	0.004	0.102	1.51824e-55	AC Ast
ENSG00000144355	2.67916e-59	0.983076	0.133	0.028	2.94976e-55	AC Ast
ENSG00000141837	4.11182e-59	0.713622	0.298	0.134	4.52712e-55	AC Ast
ENSG00000143376	7.08908e-59	0.934997	0.102	0.013	7.80508e-55	AC Ast
ENSG00000144406	1.12467e-58	0.8371	0.174	0.05	1.23827e-54	AC Ast
ENSG00000139631	3.65002e-58	0.89656	0.146	0.035	4.01867e-54	AC Ast
ENSG00000185630	7.00521e-58	0.804927	0.198	0.066	7.71273e-54	AC Ast
ENSG00000155744	2.20212e-57	0.861282	0.147	0.036	2.42453e-53	AC Ast
ENSG00000100320	1.2062e-56	0.756403	0.214	0.076	1.32803e-52	AC Ast
ENSG00000160551	1.29299e-54	0.947161	0.108	0.018	1.42358e-50	AC Ast
ENSG00000124406	2.99641e-54	0.983495	0.121	0.025	3.29905e-50	AC Ast
ENSG00000106261	1.11157e-53	0.895087	0.102	0.016	1.22384e-49	AC Ast
ENSG00000078043	1.68231e-53	0.776392	0.168	0.051	1.85222e-49	AC Ast
ENSG00000185615	2.9591e-53	1.00441	0.114	0.022	3.25797e-49	AC Ast
ENSG00000165300	6.32412e-51	0.83778	0.157	0.047	6.96286e-47	AC Ast
ENSG00000158445	1.18184e-50	0.872567	0.16	0.049	1.3012e-46	AC Ast
ENSG00000140945	2.64799e-50	0.895235	0.129	0.032	2.91543e-46	AC Ast
ENSG00000132932	2.70944e-50	0.910719	0.106	0.02	2.98309e-46	AC Ast
ENSG00000109971	9.36988e-50	-1.04564	0.055	0.175	1.03162e-45	AC Ast
ENSG00000154380	2.96373e-49	0.870204	0.101	0.018	3.26306e-45	AC Ast
ENSG00000088387	6.63956e-49	0.90722	0.104	0.019	7.31015e-45	AC Ast
ENSG00000115875	6.94746e-49	0.785164	0.107	0.021	7.64915e-45	AC Ast
ENSG00000101654	9.95621e-49	-0.729593	0.154	0.306	1.09618e-44	AC Ast
ENSG00000118971	1.70707e-48	0.85519	0.103	0.019	1.87948e-44	AC Ast
ENSG00000138398	3.72467e-48	0.747189	0.139	0.038	4.10086e-44	AC Ast
ENSG00000065883	5.2979e-48	0.846058	0.113	0.025	5.83299e-44	AC Ast
ENSG00000108107	5.82838e-48	-0.801388	0.222	0.365	6.41705e-44	AC Ast
ENSG00000107147	1.03726e-47	0.846556	0.124	0.031	1.14202e-43	AC Ast
ENSG00000137815	1.08234e-47	-0.725517	0.207	0.358	1.19166e-43	AC Ast
ENSG00000140319	1.16906e-47	-0.871585	0.153	0.293	1.28714e-43	AC Ast
ENSG00000011347	4.05177e-47	-0.89708	0.07	0.196	4.461e-43	AC Ast
ENSG00000170345	5.12993e-47	-1.04515	0.028	0.13	5.64805e-43	AC Ast
ENSG00000130770	7.97313e-47	-0.939548	0.112	0.244	8.77841e-43	AC Ast
ENSG00000150672	8.03221e-47	0.758868	0.142	0.042	8.84347e-43	AC Ast
ENSG00000101182	1.07688e-46	-0.98026	0.059	0.176	1.18564e-42	AC Ast
ENSG00000198727	1.19792e-46	0.750277	0.191	0.072	1.31891e-42	AC Ast
ENSG00000068615	4.34728e-46	0.777986	0.117	0.028	4.78635e-42	AC Ast
ENSG00000017427	6.45043e-46	0.788569	0.132	0.037	7.10192e-42	AC Ast
ENSG00000010244	8.06669e-46	0.788014	0.13	0.036	8.88143e-42	AC Ast
ENSG00000124788	4.01264e-45	0.757935	0.118	0.029	4.41791e-41	AC Ast
ENSG00000075391	4.30427e-45	0.730587	0.143	0.043	4.739e-41	AC Ast
ENSG00000106992	9.80954e-45	-0.998141	0.028	0.124	1.08003e-40	AC Ast
ENSG00000197971	1.62523e-44	0.752754	0.112	0.027	1.78938e-40	AC Ast
ENSG00000152154	5.49716e-44	0.794163	0.104	0.023	6.05237e-40	AC Ast
ENSG00000126351	8.05082e-44	0.733588	0.117	0.03	8.86395e-40	AC Ast
ENSG00000101210	8.61805e-44	0.844204	0.116	0.03	9.48847e-40	AC Ast
ENSG00000170579	9.10369e-44	0.750101	0.147	0.047	1.00232e-39	AC Ast
ENSG00000134318	2.6808e-43	0.778442	0.108	0.026	2.95156e-39	AC Ast
ENSG00000089199	2.81986e-43	-0.96287	0.061	0.173	3.10466e-39	AC Ast
ENSG00000124783	4.13829e-43	0.807302	0.124	0.035	4.55626e-39	AC Ast
ENSG00000185274	8.18511e-43	0.753903	0.144	0.047	9.0118e-39	AC Ast
ENSG00000124507	8.20682e-43	-0.870206	0.062	0.176	9.03571e-39	AC Ast
ENSG00000164070	1.8131e-42	0.775812	0.108	0.026	1.99622e-38	AC Ast
ENSG00000198625	2.17854e-42	0.776126	0.11	0.027	2.39857e-38	AC Ast
ENSG00000120738	3.36877e-42	-0.96775	0.04	0.141	3.70902e-38	AC Ast
ENSG00000167468	7.12106e-42	0.7547	0.15	0.052	7.84029e-38	AC Ast
ENSG00000127152	7.1223e-42	0.766638	0.11	0.027	7.84166e-38	AC Ast
ENSG00000185070	1.28261e-41	0.793838	0.118	0.032	1.41216e-37	AC Ast
ENSG00000145708	1.85323e-41	-0.959373	0.019	0.105	2.0404e-37	AC Ast
ENSG00000175782	5.57926e-41	0.746851	0.108	0.027	6.14276e-37	AC Ast
ENSG00000119705	1.15111e-40	-1.00692	0.049	0.151	1.26737e-36	AC Ast
ENSG00000165716	2.76295e-40	-0.918348	0.038	0.135	3.04201e-36	AC Ast
ENSG00000272325	3.52828e-40	0.735395	0.138	0.045	3.88463e-36	AC Ast
ENSG00000070413	3.8456e-40	0.693231	0.136	0.044	4.23401e-36	AC Ast
ENSG00000167654	4.12201e-40	-0.823658	0.169	0.294	4.53834e-36	AC Ast
ENSG00000123983	4.21598e-40	0.69705	0.173	0.068	4.64179e-36	AC Ast
ENSG00000161281	6.20478e-40	-1.11401	0.03	0.12	6.83146e-36	AC Ast
ENSG00000109472	6.99011e-40	0.721979	0.128	0.04	7.69611e-36	AC Ast
ENSG00000169851	9.28262e-40	0.768649	0.132	0.042	1.02202e-35	AC Ast
ENSG00000116983	1.04946e-39	-0.838258	0.097	0.215	1.15545e-35	AC Ast
ENSG00000154122	5.41709e-39	0.741559	0.12	0.036	5.96421e-35	AC Ast
ENSG00000141279	1.56915e-38	0.698945	0.127	0.04	1.72763e-34	AC Ast
ENSG00000129990	1.65536e-38	-0.871547	0.05	0.149	1.82255e-34	AC Ast
ENSG00000169228	2.32885e-38	-0.883557	0.033	0.123	2.56406e-34	AC Ast
ENSG00000183011	1.35788e-37	-0.924101	0.059	0.16	1.49503e-33	AC Ast
ENSG00000105258	1.35859e-37	-0.935881	0.05	0.146	1.49581e-33	AC Ast
ENSG00000100138	1.43887e-37	-0.809875	0.082	0.192	1.58419e-33	AC Ast
ENSG00000168993	7.09982e-37	-0.758466	0.105	0.222	7.8169e-33	AC Ast
ENSG00000169100	1.08441e-36	-0.863111	0.082	0.188	1.19394e-32	AC Ast
ENSG00000109906	1.92734e-36	-0.956125	0.076	0.179	2.122e-32	AC Ast
ENSG00000187189	2.11784e-36	0.726402	0.17	0.072	2.33174e-32	AC Ast
ENSG00000177556	2.44333e-36	-0.87126	0.037	0.126	2.6901e-32	AC Ast
ENSG00000183648	4.5773e-36	-0.912126	0.088	0.195	5.0396e-32	AC Ast
ENSG00000177239	6.56384e-36	-0.852134	0.053	0.149	7.22679e-32	AC Ast
ENSG00000159363	7.28913e-36	-0.753983	0.11	0.224	8.02533e-32	AC Ast
ENSG00000154556	4.7742e-35	0.706746	0.109	0.032	5.25639e-31	AC Ast
ENSG00000143633	8.54658e-35	-0.934152	0.03	0.112	9.40979e-31	AC Ast
ENSG00000006015	1.46815e-34	-0.855198	0.059	0.155	1.61644e-30	AC Ast
ENSG00000182768	1.12206e-33	-0.857342	0.041	0.127	1.23539e-29	AC Ast
ENSG00000112514	1.35538e-33	-0.829065	0.065	0.161	1.49227e-29	AC Ast
ENSG00000161016	4.03282e-32	-0.716588	0.14	0.251	4.44013e-28	AC Ast
ENSG00000197535	4.57591e-32	0.750399	0.11	0.036	5.03808e-28	AC Ast
ENSG00000166780	4.17319e-31	0.696354	0.104	0.034	4.59468e-27	AC Ast
ENSG00000125482	7.90697e-31	-0.862194	0.038	0.117	8.70557e-27	AC Ast
ENSG00000119866	6.7484e-30	0.731674	0.112	0.04	7.42998e-26	AC Ast
ENSG00000185024	5.34136e-29	-0.735639	0.067	0.156	5.88084e-25	AC Ast
ENSG00000084207	6.01285e-29	-0.746964	0.049	0.13	6.62015e-25	AC Ast
ENSG00000145494	1.08527e-27	-0.878563	0.032	0.101	1.19488e-23	AC Ast
ENSG00000004660	2.20954e-27	-0.708506	0.049	0.128	2.4327e-23	AC Ast
ENSG00000172301	8.67034e-27	-0.696481	0.062	0.145	9.54604e-23	AC Ast
ENSG00000172020	1.21035e-24	-0.734331	0.083	0.166	1.33259e-20	AC Ast
ENSG00000174917	5.53933e-23	-0.735635	0.041	0.106	6.09881e-19	AC Ast
ENSG00000170889	1.70542e-22	-0.749274	0.11	0.192	1.87767e-18	AC Ast
ENSG00000197444	3.90249e-22	-0.698101	0.04	0.103	4.29665e-18	AC Ast
ENSG00000198755	6.35777e-22	-0.695697	0.096	0.175	6.99991e-18	AC Ast
ENSG00000130332	7.57955e-22	-0.721209	0.042	0.107	8.34509e-18	AC Ast
ENSG00000108298	1.6591e-21	-0.799043	0.137	0.217	1.82667e-17	AC Ast
ENSG00000006128	1.90695e-14	-0.695336	0.073	0.131	2.09956e-10	AC Ast
ENSG00000198804	1.71453e-06	-1.21216	0.201	0.235	0.018877	AC Ast
ENSG00000181722	2.37894e-132	2.31619	0.536	0.051	2.61922e-128	AC OD
ENSG00000167996	1.20949e-129	3.44554	0.455	0.004	1.33165e-125	AC OD
ENSG00000182667	8.61163e-127	1.74434	0.596	0.086	9.48141e-123	AC OD
ENSG00000169020	1.94946e-124	2.25261	0.535	0.069	2.14635e-120	AC OD
ENSG00000148053	9.35193e-109	2.96498	0.395	0.003	1.02965e-104	AC OD
ENSG00000087250	7.69311e-107	1.13241	0.765	0.339	8.47011e-103	AC OD
ENSG00000198417	4.87367e-96	2.57648	0.381	0.015	5.36591e-92	AC OD
ENSG00000071082	3.05127e-88	2.24185	0.391	0.037	3.35944e-84	AC OD
ENSG00000152661	1.02209e-79	1.36923	0.442	0.073	1.12533e-75	AC OD
ENSG00000109846	2.03975e-75	1.50268	0.477	0.115	2.24577e-71	AC OD
ENSG00000232112	1.52763e-72	2.30284	0.31	0.017	1.68193e-68	AC OD
ENSG00000241343	2.66229e-72	2.74465	0.275	0	2.93119e-68	AC OD
ENSG00000153944	4.19847e-71	2.25138	0.293	0.01	4.62252e-67	AC OD
ENSG00000196683	3.02718e-70	2.1641	0.299	0.014	3.33292e-66	AC OD
ENSG00000258643	1.62391e-69	-2.64869	0	0.211	1.78792e-65	AC OD
ENSG00000138326	2.97411e-64	1.58059	0.362	0.06	3.27449e-60	AC OD
ENSG00000177600	8.29719e-55	1.3271	0.371	0.086	9.1352e-51	AC OD
ENSG00000116641	2.02349e-49	1.93913	0.227	0.015	2.22786e-45	AC OD
ENSG00000131095	4.52084e-46	0.721415	0.583	0.268	4.97745e-42	AC OD
ENSG00000080573	4.83438e-46	1.08259	0.378	0.112	5.32265e-42	AC OD
ENSG00000160678	1.05947e-45	1.91302	0.231	0.025	1.16648e-41	AC OD
ENSG00000132681	3.24245e-44	-2.51096	0.003	0.145	3.56994e-40	AC OD
ENSG00000100354	4.1786e-44	1.52348	0.246	0.034	4.60063e-40	AC OD
ENSG00000128585	2.08713e-43	1.77589	0.195	0.009	2.29793e-39	AC OD
ENSG00000244754	2.63517e-42	1.16035	0.316	0.079	2.90132e-38	AC OD
ENSG00000151012	8.44886e-42	2.15149	0.169	0.001	9.3022e-38	AC OD
ENSG00000171858	1.08591e-41	2.10548	0.169	0.001	1.19559e-37	AC OD
ENSG00000178980	4.82133e-40	2.04597	0.16	0	5.30828e-36	AC OD
ENSG00000184226	8.10873e-40	0.763573	0.44	0.165	8.92771e-36	AC OD
ENSG00000109472	1.17339e-38	1.08605	0.322	0.093	1.2919e-34	AC OD
ENSG00000162599	8.32777e-38	1.57455	0.185	0.014	9.16888e-34	AC OD
ENSG00000132613	2.94352e-36	1.83271	0.157	0.005	3.24082e-32	AC OD
ENSG00000154723	1.87869e-35	1.73146	0.163	0.009	2.06843e-31	AC OD
ENSG00000117450	3.88941e-35	1.43852	0.204	0.029	4.28224e-31	AC OD
ENSG00000183648	9.4715e-35	1.446	0.212	0.035	1.04281e-30	AC OD
ENSG00000089012	2.05166e-34	-1.89057	0.001	0.111	2.25888e-30	AC OD
ENSG00000160213	2.67418e-34	1.48425	0.182	0.02	2.94427e-30	AC OD
ENSG00000010810	2.75535e-34	1.11923	0.276	0.073	3.03364e-30	AC OD
ENSG00000065518	1.91665e-33	1.59544	0.183	0.023	2.11023e-29	AC OD
ENSG00000196091	1.23139e-32	1.07478	0.251	0.062	1.35577e-28	AC OD
ENSG00000140319	1.48803e-32	1.19993	0.258	0.07	1.63833e-28	AC OD
ENSG00000156411	3.67734e-31	1.69353	0.157	0.015	4.04875e-27	AC OD
ENSG00000131584	2.64871e-30	1.87109	0.122	0	2.91624e-26	AC OD
ENSG00000152767	3.00413e-30	1.59484	0.149	0.012	3.30754e-26	AC OD
ENSG00000198712	3.8018e-30	-2.01578	0.055	0.201	4.18578e-26	AC OD
ENSG00000155368	7.50546e-30	1.31315	0.19	0.034	8.26351e-26	AC OD
ENSG00000127483	9.30678e-30	0.972508	0.265	0.077	1.02468e-25	AC OD
ENSG00000213741	2.35514e-29	1.0553	0.229	0.057	2.59301e-25	AC OD
ENSG00000185565	8.90573e-29	1.34179	0.166	0.023	9.80521e-25	AC OD
ENSG00000168309	1.29005e-28	0.720045	0.336	0.128	1.42034e-24	AC OD
ENSG00000188647	2.96205e-28	1.7775	0.114	0	3.26121e-24	AC OD
ENSG00000099204	4.29412e-28	1.67858	0.125	0.005	4.72783e-24	AC OD
ENSG00000144040	4.87712e-28	0.816099	0.301	0.107	5.36971e-24	AC OD
ENSG00000138495	6.06095e-27	1.59508	0.125	0.007	6.67311e-23	AC OD
ENSG00000164919	9.88428e-27	1.17697	0.203	0.05	1.08826e-22	AC OD
ENSG00000172461	1.15689e-26	1.61769	0.11	0.001	1.27373e-22	AC OD
ENSG00000107863	1.41679e-26	1.44672	0.143	0.016	1.55988e-22	AC OD
ENSG00000111639	1.43792e-26	1.5534	0.135	0.013	1.58315e-22	AC OD
ENSG00000163682	6.90971e-26	1.63933	0.109	0.002	7.60759e-22	AC OD
ENSG00000108848	8.01423e-26	-0.931372	0.29	0.44	8.82367e-22	AC OD
ENSG00000170370	8.11908e-26	0.737171	0.297	0.109	8.93911e-22	AC OD
ENSG00000106211	1.05725e-25	1.14529	0.193	0.045	1.16404e-21	AC OD
ENSG00000107331	4.00443e-25	1.65107	0.101	0	4.40888e-21	AC OD
ENSG00000198804	1.16621e-24	-1.94109	0.049	0.173	1.284e-20	AC OD
ENSG00000072778	1.76275e-24	0.896276	0.233	0.073	1.94079e-20	AC OD
ENSG00000178104	2.14955e-24	1.36195	0.124	0.011	2.36666e-20	AC OD
ENSG00000141469	7.09929e-24	0.888204	0.217	0.063	7.81632e-20	AC OD
ENSG00000198838	1.29962e-23	1.1397	0.166	0.035	1.43088e-19	AC OD
ENSG00000198938	1.59596e-23	-1.67587	0.094	0.232	1.75715e-19	AC OD
ENSG00000118473	2.5294e-23	1.52908	0.103	0.004	2.78487e-19	AC OD
ENSG00000142676	3.29261e-23	1.09564	0.191	0.052	3.62516e-19	AC OD
ENSG00000175161	3.33679e-23	1.40774	0.103	0.004	3.67381e-19	AC OD
ENSG00000182272	1.53594e-22	0.802717	0.261	0.098	1.69107e-18	AC OD
ENSG00000136238	2.06745e-22	1.46059	0.102	0.005	2.27626e-18	AC OD
ENSG00000111716	5.68434e-22	1.19465	0.15	0.03	6.25846e-18	AC OD
ENSG00000110721	7.01566e-22	1.37112	0.102	0.006	7.72424e-18	AC OD
ENSG00000104290	1.58367e-21	1.36832	0.101	0.006	1.74362e-17	AC OD
ENSG00000049618	2.00343e-21	1.17873	0.114	0.012	2.20577e-17	AC OD
ENSG00000124942	2.31008e-21	1.1816	0.159	0.037	2.54339e-17	AC OD
ENSG00000123349	2.7017e-21	1.10433	0.169	0.043	2.97457e-17	AC OD
ENSG00000100201	5.48614e-21	-0.727215	0.465	0.551	6.04023e-17	AC OD
ENSG00000151322	1.13311e-20	1.2522	0.105	0.009	1.24755e-16	AC OD
ENSG00000173230	8.09359e-20	-1.33586	0.058	0.17	8.91104e-16	AC OD
ENSG00000111666	1.17111e-19	1.16213	0.106	0.012	1.28939e-15	AC OD
ENSG00000143977	1.37854e-19	1.37557	0.101	0.01	1.51778e-15	AC OD
ENSG00000125971	3.09094e-19	0.952778	0.158	0.041	3.40312e-15	AC OD
ENSG00000198911	1.15307e-18	-1.34009	0.031	0.124	1.26953e-14	AC OD
ENSG00000185432	1.22685e-18	1.08385	0.143	0.035	1.35077e-14	AC OD
ENSG00000272325	1.8385e-18	1.15423	0.103	0.013	2.02419e-14	AC OD
ENSG00000114315	3.43289e-18	-1.2638	0.061	0.168	3.77961e-14	AC OD
ENSG00000140538	1.17082e-17	0.921438	0.14	0.034	1.28907e-13	AC OD
ENSG00000161509	1.87514e-17	0.884449	0.161	0.048	2.06453e-13	AC OD
ENSG00000089737	2.41617e-17	-1.10897	0.088	0.203	2.6602e-13	AC OD
ENSG00000142534	4.0687e-17	0.787414	0.175	0.058	4.47964e-13	AC OD
ENSG00000089280	5.86529e-17	0.76063	0.145	0.038	6.45769e-13	AC OD
ENSG00000178252	7.60473e-17	0.923076	0.157	0.048	8.3728e-13	AC OD
ENSG00000156011	7.99653e-17	1.10485	0.102	0.016	8.80418e-13	AC OD
ENSG00000164292	8.22307e-17	0.953018	0.154	0.047	9.0536e-13	AC OD
ENSG00000079215	1.84858e-16	-0.714946	0.402	0.487	2.03528e-12	AC OD
ENSG00000189171	3.87746e-16	0.906326	0.15	0.046	4.26909e-12	AC OD
ENSG00000129116	4.60635e-16	0.90538	0.13	0.033	5.07159e-12	AC OD
ENSG00000114857	1.71143e-15	-1.00941	0.145	0.258	1.88428e-11	AC OD
ENSG00000123104	2.17595e-15	-1.02067	0.097	0.204	2.39572e-11	AC OD
ENSG00000108231	5.05934e-15	1.04043	0.103	0.021	5.57033e-11	AC OD
ENSG00000076344	1.24205e-14	1.00399	0.102	0.021	1.3675e-10	AC OD
ENSG00000132963	2.09093e-14	0.998598	0.104	0.023	2.30212e-10	AC OD
ENSG00000119705	2.46552e-14	0.94273	0.125	0.036	2.71454e-10	AC OD
ENSG00000186350	3.20032e-14	0.760359	0.135	0.041	3.52356e-10	AC OD
ENSG00000130203	4.48493e-14	-0.992867	0.255	0.353	4.93791e-10	AC OD
ENSG00000099622	6.64953e-14	-0.896244	0.178	0.284	7.32113e-10	AC OD
ENSG00000090863	1.45918e-13	0.925205	0.105	0.026	1.60655e-09	AC OD
ENSG00000135919	1.54769e-13	0.791435	0.131	0.041	1.704e-09	AC OD
ENSG00000119950	1.59808e-13	0.712922	0.126	0.037	1.75949e-09	AC OD
ENSG00000198886	1.62559e-13	-1.49026	0.093	0.186	1.78977e-09	AC OD
ENSG00000121310	3.15763e-13	0.914147	0.101	0.024	3.47655e-09	AC OD
ENSG00000162390	3.70577e-13	0.760764	0.108	0.028	4.08006e-09	AC OD
ENSG00000173436	5.59367e-13	0.888364	0.11	0.03	6.15863e-09	AC OD
ENSG00000072310	1.04789e-12	-1.23479	0.039	0.113	1.15373e-08	AC OD
ENSG00000144674	1.28319e-12	-1.15115	0.042	0.118	1.41279e-08	AC OD
ENSG00000134324	1.5557e-12	0.708959	0.173	0.074	1.71283e-08	AC OD
ENSG00000135924	1.94367e-12	0.785394	0.119	0.037	2.13998e-08	AC OD
ENSG00000123933	2.79433e-12	0.849195	0.105	0.029	3.07656e-08	AC OD
ENSG00000115977	5.16461e-12	0.807464	0.11	0.033	5.68624e-08	AC OD
ENSG00000145734	1.49277e-11	-0.988057	0.053	0.131	1.64354e-07	AC OD
ENSG00000126777	5.8974e-11	-0.825098	0.123	0.215	6.49303e-07	AC OD
ENSG00000109107	6.87699e-11	-1.00222	0.127	0.213	7.57156e-07	AC OD
ENSG00000166833	7.70339e-11	-1.25135	0.07	0.146	8.48144e-07	AC OD
ENSG00000106443	2.66216e-10	-1.03336	0.067	0.141	2.93103e-06	AC OD
ENSG00000108654	1.19653e-09	-0.771878	0.171	0.255	1.31738e-05	AC OD
ENSG00000167522	3.81903e-09	-0.933309	0.062	0.129	4.20476e-05	AC OD
ENSG00000179094	4.92601e-09	-0.836177	0.076	0.148	5.42354e-05	AC OD
ENSG00000198899	5.52372e-09	-1.24301	0.063	0.128	6.08161e-05	AC OD
ENSG00000151461	7.03976e-09	-0.902996	0.049	0.111	7.75078e-05	AC OD
ENSG00000117523	9.58918e-09	-0.922458	0.076	0.146	0.000105577	AC OD
ENSG00000205336	1.86209e-07	-0.799153	0.12	0.188	0.00205016	AC OD
ENSG00000117713	7.87356e-07	-0.871237	0.071	0.128	0.00866879	AC OD
ENSG00000109113	2.00837e-06	-0.924445	0.053	0.102	0.0221122	AC OD
ENSG00000134138	2.43373e-06	-0.778241	0.087	0.144	0.0267954	AC OD
ENSG00000101654	2.71383e-06	-0.895664	0.066	0.118	0.0298792	AC OD
ENSG00000134186	4.11251e-06	-0.983377	0.056	0.103	0.0452788	AC OD
ENSG00000204681	1.17326e-05	-0.769619	0.162	0.214	0.129176	AC OD
ENSG00000198763	2.27494e-05	-0.874048	0.06	0.105	0.250471	AC OD
ENSG00000111642	8.79329e-05	-0.746888	0.062	0.103	0.968142	AC OD
ENSG00000124126	0.000146563	-0.784243	0.079	0.121	1	AC OD
ENSG00000145284	0.000752569	-0.751397	0.105	0.145	1	AC OD
ENSG00000182667	3.63297e-72	3.01024	0.629	0.021	3.9999e-68	AC OPC
ENSG00000139910	2.27218e-48	1.74401	0.611	0.09	2.50167e-44	AC OPC
ENSG00000181722	4.62303e-40	2.27713	0.426	0.028	5.08996e-36	AC OPC
ENSG00000116147	2.98949e-38	2.67337	0.365	0.009	3.29143e-34	AC OPC
ENSG00000167996	2.90252e-34	2.92077	0.313	0.002	3.19568e-30	AC OPC
ENSG00000148948	1.73346e-29	2.30231	0.31	0.017	1.90854e-25	AC OPC
ENSG00000187957	1.05082e-24	2.25852	0.261	0.014	1.15695e-20	AC OPC
ENSG00000100354	2.04935e-23	2.25082	0.234	0.007	2.25633e-19	AC OPC
ENSG00000075624	1.85412e-21	1.56548	0.292	0.038	2.04139e-17	AC OPC
ENSG00000127328	2.28751e-21	1.8502	0.231	0.012	2.51855e-17	AC OPC
ENSG00000140526	7.6356e-21	2.00723	0.219	0.009	8.4068e-17	AC OPC
ENSG00000131584	1.35722e-17	2.2197	0.161	0	1.4943e-13	AC OPC
ENSG00000148053	1.94058e-17	2.06165	0.167	0.002	2.13658e-13	AC OPC
ENSG00000163531	6.02993e-17	2.12557	0.155	0	6.63895e-13	AC OPC
ENSG00000175161	7.2321e-17	2.1151	0.161	0.002	7.96255e-13	AC OPC
ENSG00000136235	1.39979e-16	1.82533	0.201	0.019	1.54117e-12	AC OPC
ENSG00000171867	3.57175e-16	1.61762	0.204	0.021	3.93249e-12	AC OPC
ENSG00000128585	1.16525e-15	2.17604	0.143	0	1.28294e-11	AC OPC
ENSG00000244754	1.32027e-15	1.14534	0.267	0.052	1.45362e-11	AC OPC
ENSG00000152492	1.62267e-15	1.43183	0.207	0.024	1.78656e-11	AC OPC
ENSG00000134369	2.21601e-15	1.81024	0.155	0.005	2.43983e-11	AC OPC
ENSG00000258643	2.36822e-15	-2.76328	0	0.173	2.60741e-11	AC OPC
ENSG00000109472	2.7732e-15	1.81434	0.176	0.014	3.0533e-11	AC OPC
ENSG00000185565	3.53964e-14	1.80307	0.149	0.007	3.89714e-10	AC OPC
ENSG00000197971	1.58968e-13	1.64868	0.176	0.021	1.75024e-09	AC OPC
ENSG00000147481	4.01068e-13	1.93392	0.119	0	4.41576e-09	AC OPC
ENSG00000115355	4.81835e-13	1.05269	0.243	0.055	5.30501e-09	AC OPC
ENSG00000153944	5.67213e-13	1.73019	0.125	0.002	6.24502e-09	AC OPC
ENSG00000182389	5.7077e-13	1.70689	0.125	0.002	6.28417e-09	AC OPC
ENSG00000107331	8.26312e-13	1.91732	0.116	0	9.0977e-09	AC OPC
ENSG00000156103	1.16629e-12	1.73595	0.122	0.002	1.28408e-08	AC OPC
ENSG00000072182	1.35449e-12	1.74809	0.128	0.005	1.4913e-08	AC OPC
ENSG00000142192	1.8053e-12	1.51779	0.161	0.019	1.98763e-08	AC OPC
ENSG00000146592	2.37932e-12	1.73093	0.119	0.002	2.61963e-08	AC OPC
ENSG00000184226	3.0963e-12	0.693684	0.392	0.14	3.40903e-08	AC OPC
ENSG00000166033	3.60154e-12	0.88705	0.249	0.062	3.9653e-08	AC OPC
ENSG00000169020	5.48565e-12	1.32097	0.173	0.026	6.0397e-08	AC OPC
ENSG00000110436	7.6437e-12	1.1684	0.173	0.026	8.41572e-08	AC OPC
ENSG00000175130	1.57879e-11	0.955432	0.195	0.038	1.73825e-07	AC OPC
ENSG00000105894	2.34776e-11	1.28021	0.152	0.019	2.58488e-07	AC OPC
ENSG00000071082	2.38979e-11	1.65516	0.128	0.009	2.63116e-07	AC OPC
ENSG00000127483	2.77495e-11	0.752228	0.249	0.066	3.05522e-07	AC OPC
ENSG00000139289	2.80951e-11	1.30792	0.146	0.017	3.09327e-07	AC OPC
ENSG00000198938	3.58392e-11	-1.35115	0.182	0.355	3.9459e-07	AC OPC
ENSG00000153707	3.77912e-11	1.813	0.106	0.002	4.16081e-07	AC OPC
ENSG00000172667	4.21088e-11	1.62737	0.106	0.002	4.63618e-07	AC OPC
ENSG00000162599	4.55078e-11	1.66872	0.119	0.007	5.01041e-07	AC OPC
ENSG00000152208	8.84643e-11	1.49374	0.109	0.005	9.73992e-07	AC OPC
ENSG00000107863	1.21375e-10	1.34476	0.134	0.014	1.33633e-06	AC OPC
ENSG00000156113	1.92419e-10	1.49373	0.112	0.007	2.11854e-06	AC OPC
ENSG00000133401	2.18602e-10	1.37918	0.131	0.014	2.40681e-06	AC OPC
ENSG00000164176	2.4215e-10	1.23505	0.152	0.024	2.66607e-06	AC OPC
ENSG00000140538	5.66765e-10	1.05098	0.164	0.031	6.24008e-06	AC OPC
ENSG00000197746	6.20067e-10	0.851544	0.283	0.1	6.82693e-06	AC OPC
ENSG00000135924	8.27511e-10	1.46071	0.106	0.007	9.11089e-06	AC OPC
ENSG00000118473	1.03252e-09	1.40253	0.106	0.007	1.13681e-05	AC OPC
ENSG00000169554	1.20636e-09	1.07242	0.14	0.021	1.32821e-05	AC OPC
ENSG00000064787	1.56134e-09	1.14883	0.143	0.024	1.71903e-05	AC OPC
ENSG00000139746	2.04245e-09	0.986215	0.161	0.033	2.24874e-05	AC OPC
ENSG00000152377	2.4279e-09	1.41289	0.119	0.014	2.67312e-05	AC OPC
ENSG00000144230	3.22121e-09	1.07442	0.167	0.038	3.54655e-05	AC OPC
ENSG00000185046	4.71194e-09	0.980743	0.128	0.019	5.18784e-05	AC OPC
ENSG00000168000	6.33964e-09	-1.91336	0.006	0.111	6.97995e-05	AC OPC
ENSG00000101203	6.97898e-09	1.27927	0.103	0.009	7.68386e-05	AC OPC
ENSG00000075043	7.59665e-09	1.20835	0.109	0.012	8.36391e-05	AC OPC
ENSG00000005513	1.36662e-08	1.06435	0.152	0.033	0.000150464	AC OPC
ENSG00000135916	2.29933e-08	0.855487	0.158	0.038	0.000253156	AC OPC
ENSG00000179915	2.4511e-08	0.998547	0.173	0.047	0.000269866	AC OPC
ENSG00000070214	2.54686e-08	0.94861	0.14	0.028	0.00028041	AC OPC
ENSG00000173546	2.72195e-08	0.94722	0.179	0.05	0.000299687	AC OPC
ENSG00000013441	2.76248e-08	1.09954	0.134	0.026	0.000304149	AC OPC
ENSG00000170075	2.88061e-08	1.30413	0.112	0.017	0.000317155	AC OPC
ENSG00000070413	2.90819e-08	1.27282	0.112	0.017	0.000320192	AC OPC
ENSG00000198712	3.48941e-08	-1.43264	0.122	0.263	0.000384184	AC OPC
ENSG00000163399	3.58194e-08	1.061	0.119	0.019	0.000394371	AC OPC
ENSG00000115524	4.12868e-08	1.25614	0.106	0.014	0.000454568	AC OPC
ENSG00000198886	6.99723e-08	-1.30639	0.125	0.263	0.000770395	AC OPC
ENSG00000145555	9.93469e-08	1.06819	0.103	0.014	0.00109381	AC OPC
ENSG00000108848	1.02609e-07	-0.857015	0.28	0.396	0.00112973	AC OPC
ENSG00000176884	1.0603e-07	0.839161	0.155	0.04	0.00116739	AC OPC
ENSG00000087460	1.19737e-07	1.04701	0.14	0.033	0.0013183	AC OPC
ENSG00000141837	1.29083e-07	0.724526	0.128	0.026	0.00142121	AC OPC
ENSG00000089280	1.85638e-07	0.803774	0.17	0.05	0.00204387	AC OPC
ENSG00000078018	2.21361e-07	0.985692	0.146	0.038	0.00243718	AC OPC
ENSG00000132329	6.97019e-07	0.699281	0.137	0.036	0.00767418	AC OPC
ENSG00000198804	7.16572e-07	-1.89141	0.082	0.199	0.00788946	AC OPC
ENSG00000169045	1.3273e-06	1.01096	0.109	0.024	0.0146136	AC OPC
ENSG00000135090	1.40526e-06	-1.19698	0.167	0.28	0.0154719	AC OPC
ENSG00000132718	4.72171e-06	0.782465	0.109	0.026	0.0519861	AC OPC
ENSG00000116001	6.82307e-06	0.817456	0.106	0.026	0.075122	AC OPC
ENSG00000130294	7.02057e-06	0.808987	0.116	0.031	0.0772965	AC OPC
ENSG00000138443	1.48392e-05	0.707208	0.103	0.026	0.163379	AC OPC
ENSG00000162512	1.8414e-05	-1.07245	0.161	0.261	0.202738	AC OPC
ENSG00000107281	2.56914e-05	0.714652	0.122	0.038	0.282863	AC OPC
ENSG00000089041	2.85795e-05	0.877001	0.106	0.031	0.314661	AC OPC
ENSG00000114646	2.89785e-05	0.724589	0.112	0.033	0.319054	AC OPC
ENSG00000122406	4.89834e-05	0.737572	0.109	0.033	0.539307	AC OPC
ENSG00000134313	5.61432e-05	0.790088	0.103	0.031	0.618137	AC OPC
ENSG00000204099	8.91893e-05	-1.30855	0.055	0.135	0.981975	AC OPC
ENSG00000104852	0.00021641	-0.889322	0.179	0.261	1	AC OPC
ENSG00000076864	0.00116121	-0.987387	0.082	0.152	1	AC OPC
ENSG00000165802	0.00728464	-0.909041	0.052	0.102	1	AC OPC
ENSG00000089737	0.0131982	-0.895149	0.1	0.149	1	AC OPC
ENSG00000090097	0.014052	-0.820025	0.064	0.111	1	AC OPC
ENSG00000185650	0.0152611	-0.869923	0.137	0.182	1	AC OPC
ENSG00000110881	0.015465	-0.871923	0.061	0.107	1	AC OPC
ENSG00000072071	0.0173477	-0.847734	0.076	0.123	1	AC OPC
ENSG00000076604	0.0239617	-0.745453	0.067	0.111	1	AC OPC
ENSG00000198899	0.0275554	-0.722179	0.082	0.126	1	AC OPC
ENSG00000072134	0.0290551	-0.750448	0.231	0.258	1	AC OPC
ENSG00000170091	0.0327992	-0.917591	0.076	0.116	1	AC OPC
ENSG00000171316	0.0337763	-0.868182	0.076	0.116	1	AC OPC
ENSG00000104888	0.0618811	-0.723839	0.1	0.135	1	AC OPC
ENSG00000008294	0.0713529	-0.699789	0.1	0.133	1	AC OPC
ENSG00000117523	0.0744403	-0.859483	0.07	0.102	1	AC OPC
ENSG00000149187	0.0829773	-0.718062	0.082	0.114	1	AC OPC
ENSG00000112280	0.0882086	-0.73329	0.14	0.168	1	AC OPC
ENSG00000118785	1.03402e-66	2.62038	0.851	0.103	1.13846e-62	AC MG
ENSG00000167996	2.90349e-48	3.5916	0.631	0.028	3.19674e-44	AC MG
ENSG00000071082	9.59485e-32	2.8956	0.482	0.04	1.05639e-27	AC MG
ENSG00000087250	1.21404e-27	-2.35516	0.134	0.512	1.33666e-23	AC MG
ENSG00000241343	4.20794e-26	3.53139	0.36	0	4.63294e-22	AC MG
ENSG00000100600	1.70147e-25	-2.33914	0.055	0.401	1.87332e-21	AC MG
ENSG00000163682	7.36285e-23	2.96361	0.326	0.004	8.1065e-19	AC MG
ENSG00000171858	7.90193e-21	2.74868	0.308	0.008	8.70003e-17	AC MG
ENSG00000028137	3.57138e-19	-1.79682	0.079	0.369	3.93209e-15	AC MG
ENSG00000136238	1.91641e-18	2.70652	0.262	0	2.10997e-14	AC MG
ENSG00000173821	3.26871e-18	-1.90356	0.049	0.313	3.59884e-14	AC MG
ENSG00000075624	1.07037e-17	1.64365	0.381	0.071	1.17848e-13	AC MG
ENSG00000130208	5.6546e-17	2.29377	0.305	0.036	6.22572e-13	AC MG
ENSG00000197746	4.48451e-16	1.49919	0.393	0.095	4.93744e-12	AC MG
ENSG00000223865	1.73876e-15	-1.95637	0.04	0.266	1.91437e-11	AC MG
ENSG00000112149	4.21977e-15	-2.24311	0.018	0.218	4.64597e-11	AC MG
ENSG00000185883	8.49088e-15	-2.42063	0	0.171	9.34846e-11	AC MG
ENSG00000135047	1.07577e-14	-1.97308	0.021	0.222	1.18443e-10	AC MG
ENSG00000026297	4.92189e-14	0.923638	0.537	0.214	5.419e-10	AC MG
ENSG00000258643	3.79288e-13	-2.24632	0	0.151	4.17596e-09	AC MG
ENSG00000140678	5.28328e-13	-1.80113	0.043	0.242	5.81689e-09	AC MG
ENSG00000125089	3.60367e-12	-1.61353	0.049	0.242	3.96764e-08	AC MG
ENSG00000123095	4.51647e-12	2.08199	0.192	0.008	4.97264e-08	AC MG
ENSG00000169554	5.26358e-12	1.74711	0.216	0.02	5.7952e-08	AC MG
ENSG00000232112	1.01101e-11	1.56541	0.244	0.036	1.11313e-07	AC MG
ENSG00000169020	1.47739e-11	1.45422	0.287	0.067	1.6266e-07	AC MG
ENSG00000028277	1.64922e-11	1.67444	0.226	0.028	1.81579e-07	AC MG
ENSG00000142669	2.42414e-11	2.17884	0.162	0	2.66898e-07	AC MG
ENSG00000132530	4.37158e-11	-1.73994	0.024	0.183	4.81311e-07	AC MG
ENSG00000151726	3.31434e-10	-1.50246	0.043	0.206	3.64909e-06	AC MG
ENSG00000125730	1.19808e-09	0.811531	0.445	0.198	1.31908e-05	AC MG
ENSG00000168000	1.33669e-09	-1.69697	0	0.107	1.4717e-05	AC MG
ENSG00000140350	2.16651e-09	1.84476	0.159	0.012	2.38533e-05	AC MG
ENSG00000152518	2.59815e-09	1.08351	0.25	0.056	2.86056e-05	AC MG
ENSG00000173193	3.53664e-09	-1.51884	0.037	0.183	3.89384e-05	AC MG
ENSG00000106211	5.81467e-09	1.37611	0.201	0.036	6.40195e-05	AC MG
ENSG00000197766	7.49037e-09	-1.65858	0.018	0.143	8.2469e-05	AC MG
ENSG00000082074	7.93799e-09	1.6441	0.168	0.02	8.73973e-05	AC MG
ENSG00000130203	1.22209e-08	-0.966824	0.412	0.567	0.000134552	AC MG
ENSG00000004059	1.28584e-08	-1.59747	0.012	0.127	0.000141571	AC MG
ENSG00000128016	1.62052e-08	-1.43543	0.055	0.202	0.00017842	AC MG
ENSG00000130775	3.32266e-08	-1.48095	0.04	0.175	0.000365825	AC MG
ENSG00000042980	3.42256e-08	1.59615	0.149	0.016	0.000376824	AC MG
ENSG00000172667	3.63971e-08	1.8793	0.122	0.004	0.000400732	AC MG
ENSG00000137642	4.18368e-08	1.0548	0.338	0.143	0.000460623	AC MG
ENSG00000132639	5.56825e-08	-1.0749	0.076	0.234	0.000613064	AC MG
ENSG00000178980	9.25196e-08	1.71847	0.107	0	0.00101864	AC MG
ENSG00000081189	1.19246e-07	0.809602	0.345	0.151	0.0013129	AC MG
ENSG00000161960	1.2324e-07	-1.08513	0.07	0.222	0.00135687	AC MG
ENSG00000101347	1.44573e-07	1.85718	0.104	0	0.00159174	AC MG
ENSG00000228474	1.83535e-07	1.70051	0.128	0.012	0.00202072	AC MG
ENSG00000107263	2.2109e-07	-1.52022	0.021	0.131	0.0024342	AC MG
ENSG00000169564	2.25662e-07	1.74619	0.101	0	0.00248454	AC MG
ENSG00000104904	2.26995e-07	1.09301	0.216	0.06	0.00249922	AC MG
ENSG00000100354	2.53465e-07	1.41729	0.143	0.02	0.00279065	AC MG
ENSG00000120594	3.65511e-07	1.71469	0.107	0.004	0.00402427	AC MG
ENSG00000101654	3.72722e-07	-1.18013	0.046	0.175	0.00410367	AC MG
ENSG00000127483	4.26894e-07	1.11214	0.226	0.071	0.00470011	AC MG
ENSG00000198625	6.85244e-07	1.42252	0.137	0.02	0.00754454	AC MG
ENSG00000076641	8.99295e-07	1.63893	0.101	0.004	0.00990124	AC MG
ENSG00000168918	9.23268e-07	1.31743	0.119	0.012	0.0101652	AC MG
ENSG00000110077	9.71725e-07	1.18146	0.159	0.032	0.0106987	AC MG
ENSG00000106052	1.06429e-06	-1.37678	0.018	0.115	0.0117178	AC MG
ENSG00000079277	1.17863e-06	1.06811	0.207	0.063	0.0129768	AC MG
ENSG00000240972	1.2737e-06	1.10648	0.229	0.079	0.0140234	AC MG
ENSG00000177600	1.55716e-06	0.838435	0.515	0.377	0.0171443	AC MG
ENSG00000131711	1.59085e-06	-1.03882	0.073	0.206	0.0175153	AC MG
ENSG00000197971	1.87598e-06	1.57775	0.104	0.008	0.0206545	AC MG
ENSG00000118640	1.94965e-06	1.54278	0.104	0.008	0.0214657	AC MG
ENSG00000121933	1.9929e-06	0.965432	0.189	0.052	0.0219419	AC MG
ENSG00000089041	2.08136e-06	1.18914	0.159	0.036	0.0229158	AC MG
ENSG00000115977	2.2494e-06	1.18169	0.137	0.024	0.0247659	AC MG
ENSG00000172578	2.42672e-06	-1.24631	0.018	0.111	0.0267182	AC MG
ENSG00000145675	2.60026e-06	-1.08005	0.04	0.151	0.0286288	AC MG
ENSG00000115355	2.62209e-06	0.953707	0.201	0.063	0.0288692	AC MG
ENSG00000204482	3.48845e-06	1.00625	0.159	0.036	0.0384078	AC MG
ENSG00000143870	3.51232e-06	1.52323	0.101	0.008	0.0386707	AC MG
ENSG00000196683	4.00885e-06	0.868899	0.238	0.087	0.0441375	AC MG
ENSG00000067082	4.33792e-06	-1.1664	0.095	0.226	0.0477605	AC MG
ENSG00000089737	4.54569e-06	-0.943064	0.076	0.206	0.0500481	AC MG
ENSG00000038945	4.69455e-06	-1.155	0.03	0.131	0.051687	AC MG
ENSG00000169045	6.74663e-06	1.12035	0.14	0.032	0.0742804	AC MG
ENSG00000198712	7.41233e-06	-1.74549	0.073	0.187	0.0816098	AC MG
ENSG00000170525	8.95795e-06	-1.047	0.082	0.202	0.098627	AC MG
ENSG00000109670	9.27255e-06	-1.03035	0.043	0.147	0.102091	AC MG
ENSG00000145416	9.31639e-06	1.06361	0.134	0.028	0.102573	AC MG
ENSG00000163220	9.51634e-06	1.1933	0.134	0.028	0.104775	AC MG
ENSG00000137815	1.12968e-05	-1.06033	0.043	0.147	0.124378	AC MG
ENSG00000144674	1.36391e-05	-1.03394	0.055	0.163	0.150166	AC MG
ENSG00000087460	1.40027e-05	1.11786	0.183	0.063	0.15417	AC MG
ENSG00000130309	1.46731e-05	1.30838	0.107	0.016	0.161551	AC MG
ENSG00000149311	1.57946e-05	0.941908	0.159	0.044	0.173899	AC MG
ENSG00000147416	1.69073e-05	-0.807021	0.046	0.151	0.186149	AC MG
ENSG00000168490	1.84694e-05	-0.966655	0.04	0.139	0.203348	AC MG
ENSG00000128989	2.16185e-05	-0.913667	0.03	0.123	0.23802	AC MG
ENSG00000198804	2.27558e-05	-1.86542	0.082	0.194	0.250541	AC MG
ENSG00000067715	2.92239e-05	-0.907741	0.116	0.238	0.321755	AC MG
ENSG00000109046	3.40236e-05	-0.70278	0.223	0.353	0.3746	AC MG
ENSG00000166033	3.85895e-05	0.940464	0.125	0.028	0.424871	AC MG
ENSG00000069849	3.98615e-05	-1.05898	0.037	0.127	0.438875	AC MG
ENSG00000145734	4.01439e-05	-1.02479	0.037	0.127	0.441985	AC MG
ENSG00000137462	6.21446e-05	1.23883	0.11	0.024	0.684213	AC MG
ENSG00000139679	6.77292e-05	0.853531	0.152	0.048	0.745699	AC MG
ENSG00000136854	7.59696e-05	-1.00858	0.037	0.123	0.836425	AC MG
ENSG00000160310	8.97626e-05	1.11525	0.116	0.028	0.988287	AC MG
ENSG00000032219	9.00781e-05	-0.961761	0.027	0.107	0.99176	AC MG
ENSG00000154277	0.000100173	-0.825583	0.088	0.198	1	AC MG
ENSG00000169100	0.000108774	-1.01599	0.076	0.179	1	AC MG
ENSG00000170345	0.000121313	0.85358	0.195	0.083	1	AC MG
ENSG00000143384	0.000124795	-1.36245	0.027	0.103	1	AC MG
ENSG00000165802	0.000127918	-0.830477	0.061	0.159	1	AC MG
ENSG00000166598	0.000151756	1.02595	0.125	0.036	1	AC MG
ENSG00000112739	0.000176752	-1.10564	0.046	0.131	1	AC MG
ENSG00000126264	0.000187394	0.961435	0.104	0.024	1	AC MG
ENSG00000171867	0.000192085	1.23643	0.113	0.032	1	AC MG
ENSG00000140968	0.000195667	0.91264	0.149	0.052	1	AC MG
ENSG00000117632	0.000221539	-0.901634	0.046	0.131	1	AC MG
ENSG00000125844	0.000225709	-0.971204	0.037	0.115	1	AC MG
ENSG00000110324	0.000275152	-0.930471	0.04	0.119	1	AC MG
ENSG00000049618	0.000282794	0.90169	0.101	0.024	1	AC MG
ENSG00000055483	0.000288504	-0.984417	0.03	0.103	1	AC MG
ENSG00000131095	0.000289791	0.805075	0.122	0.036	1	AC MG
ENSG00000168036	0.000293919	-0.954149	0.046	0.127	1	AC MG
ENSG00000198886	0.000303284	-1.43749	0.088	0.179	1	AC MG
ENSG00000185088	0.000317696	0.971351	0.113	0.032	1	AC MG
ENSG00000185946	0.000344378	-0.845948	0.046	0.127	1	AC MG
ENSG00000155659	0.000345149	0.72499	0.14	0.048	1	AC MG
ENSG00000148180	0.000357136	0.8716	0.131	0.044	1	AC MG
ENSG00000175899	0.000379576	-0.835497	0.171	0.274	1	AC MG
ENSG00000177885	0.000396454	-0.871413	0.046	0.127	1	AC MG
ENSG00000150625	0.000464593	-0.760721	0.067	0.159	1	AC MG
ENSG00000100280	0.000498165	-0.926859	0.07	0.155	1	AC MG
ENSG00000116754	0.000505911	0.903155	0.149	0.06	1	AC MG
ENSG00000167851	0.000544131	-0.952053	0.052	0.131	1	AC MG
ENSG00000170581	0.000558159	-0.783507	0.067	0.155	1	AC MG
ENSG00000132386	0.000590828	-1.06645	0.04	0.111	1	AC MG
ENSG00000150347	0.000659139	-0.968622	0.037	0.107	1	AC MG
ENSG00000023902	0.000793711	-0.815406	0.07	0.155	1	AC MG
ENSG00000143546	0.000850323	0.817712	0.131	0.048	1	AC MG
ENSG00000142185	0.000942743	-1.1388	0.037	0.103	1	AC MG
ENSG00000064607	0.000963681	1.03269	0.119	0.044	1	AC MG
ENSG00000177575	0.00106258	-1.02641	0.04	0.107	1	AC MG
ENSG00000151474	0.00130257	0.885227	0.107	0.036	1	AC MG
ENSG00000071553	0.00135798	-0.906066	0.046	0.115	1	AC MG
ENSG00000105223	0.00147592	-0.792178	0.07	0.151	1	AC MG
ENSG00000177239	0.00158311	-0.770278	0.043	0.111	1	AC MG
ENSG00000151914	0.00180019	-0.743887	0.091	0.175	1	AC MG
ENSG00000176956	0.00210061	-0.761995	0.049	0.119	1	AC MG
ENSG00000141002	0.00212136	-0.697319	0.082	0.163	1	AC MG
ENSG00000027697	0.00212358	0.746403	0.116	0.044	1	AC MG
ENSG00000174720	0.00212552	-0.818165	0.04	0.103	1	AC MG
ENSG00000013441	0.00244711	0.774386	0.113	0.044	1	AC MG
ENSG00000117616	0.00253754	-0.746676	0.091	0.171	1	AC MG
ENSG00000141837	0.0033365	0.88122	0.119	0.052	1	AC MG
ENSG00000133313	0.00357148	-0.885695	0.061	0.127	1	AC MG
ENSG00000100906	0.00593705	-0.834766	0.052	0.111	1	AC MG
ENSG00000110651	0.00812407	0.712717	0.143	0.075	1	AC MG
ENSG00000089820	0.00829714	-0.843687	0.067	0.127	1	AC MG
ENSG00000198938	0.0103584	-1.02152	0.134	0.198	1	AC MG
ENSG00000138814	0.0109983	-0.743256	0.055	0.111	1	AC MG
ENSG00000234906	0.0393665	-0.787242	0.07	0.115	1	AC MG
ENSG00000198899	0.100588	-0.934383	0.073	0.107	1	AC MG
ENSG00000167996	0	3.89473	0.637	0.009	0	CN Neu
ENSG00000107331	0	3.60443	0.523	0.001	0	CN Neu
ENSG00000168314	0	3.14496	0.354	0.003	0	CN Neu
ENSG00000178980	0	2.78709	0.281	0.001	0	CN Neu
ENSG00000167123	0	2.72506	0.32	0.008	0	CN Neu
ENSG00000197971	2.49989e-280	1.37065	0.694	0.188	2.63089e-276	CN Neu
ENSG00000165566	1.97116e-269	1.99935	0.355	0.032	2.07445e-265	CN Neu
ENSG00000187147	1.58846e-256	2.66975	0.21	0	1.67169e-252	CN Neu
ENSG00000181722	1.20368e-219	1.81646	0.344	0.042	1.26676e-215	CN Neu
ENSG00000163531	2.44801e-219	2.35907	0.194	0.003	2.57628e-215	CN Neu
ENSG00000146592	5.6509e-200	2.22883	0.163	0	5.947e-196	CN Neu
ENSG00000250722	4.10189e-191	1.60085	0.296	0.034	4.31683e-187	CN Neu
ENSG00000100354	1.19958e-182	2.20487	0.175	0.005	1.26243e-178	CN Neu
ENSG00000169554	1.87372e-175	1.82377	0.218	0.016	1.9719e-171	CN Neu
ENSG00000135924	1.403e-171	1.95231	0.212	0.015	1.47652e-167	CN Neu
ENSG00000184226	2.06599e-170	1.17709	0.568	0.178	2.17424e-166	CN Neu
ENSG00000153707	5.87945e-161	1.79955	0.196	0.013	6.18753e-157	CN Neu
ENSG00000136541	1.2079e-159	1.78503	0.178	0.009	1.2712e-155	CN Neu
ENSG00000203485	1.89671e-155	2.10893	0.13	0	1.9961e-151	CN Neu
ENSG00000155886	5.65079e-155	1.93427	0.167	0.008	5.94689e-151	CN Neu
ENSG00000244274	1.18376e-144	-3.65106	0.001	0.399	1.24579e-140	CN Neu
ENSG00000137941	5.25264e-144	1.22624	0.424	0.109	5.52788e-140	CN Neu
ENSG00000175130	1.26997e-141	1.53445	0.25	0.035	1.33651e-137	CN Neu
ENSG00000123560	6.73167e-135	-0.727986	0.752	0.891	7.08441e-131	CN Neu
ENSG00000124406	1.82934e-133	1.55736	0.191	0.019	1.92519e-129	CN Neu
ENSG00000134313	8.8763e-128	1.54539	0.179	0.016	9.34142e-124	CN Neu
ENSG00000164176	1.4575e-127	1.39242	0.27	0.049	1.53387e-123	CN Neu
ENSG00000136717	3.75409e-127	1.01698	0.356	0.084	3.95081e-123	CN Neu
ENSG00000112379	4.07845e-126	1.94034	0.113	0.002	4.29216e-122	CN Neu
ENSG00000071054	1.01578e-124	1.50279	0.206	0.026	1.06901e-120	CN Neu
ENSG00000182667	2.59942e-123	1.91558	0.124	0.004	2.73563e-119	CN Neu
ENSG00000161671	2.73027e-122	1.91899	0.136	0.007	2.87333e-118	CN Neu
ENSG00000198625	7.41427e-122	1.63319	0.172	0.016	7.80278e-118	CN Neu
ENSG00000116754	2.78797e-120	1.47615	0.192	0.022	2.93406e-116	CN Neu
ENSG00000107863	4.62441e-116	1.3829	0.196	0.025	4.86672e-112	CN Neu
ENSG00000197746	2.47917e-115	1.27487	0.268	0.053	2.60908e-111	CN Neu
ENSG00000169020	3.70704e-111	1.52896	0.209	0.032	3.90129e-107	CN Neu
ENSG00000129538	1.87202e-109	1.20603	0.275	0.059	1.97011e-105	CN Neu
ENSG00000106772	1.37352e-107	1.5349	0.136	0.01	1.44549e-103	CN Neu
ENSG00000197959	2.99319e-106	1.59681	0.13	0.009	3.15003e-102	CN Neu
ENSG00000170915	6.75498e-104	1.72753	0.107	0.004	7.10894e-100	CN Neu
ENSG00000115355	1.22733e-103	1.12101	0.241	0.047	1.29164e-99	CN Neu
ENSG00000115310	2.36647e-102	0.803153	0.356	0.099	2.49048e-98	CN Neu
ENSG00000172005	9.93909e-98	1.22986	0.199	0.033	1.04599e-93	CN Neu
ENSG00000075624	1.40453e-97	0.970398	0.273	0.063	1.47812e-93	CN Neu
ENSG00000160551	1.21918e-92	1.48273	0.104	0.005	1.28307e-88	CN Neu
ENSG00000089280	3.93886e-90	1.364	0.17	0.026	4.14526e-86	CN Neu
ENSG00000157827	6.5208e-89	1.38568	0.122	0.011	6.86249e-85	CN Neu
ENSG00000142192	7.09991e-89	1.19055	0.197	0.037	7.47195e-85	CN Neu
ENSG00000013441	4.05288e-87	1.32624	0.171	0.027	4.26525e-83	CN Neu
ENSG00000171867	5.16829e-87	1.52034	0.123	0.012	5.43911e-83	CN Neu
ENSG00000187957	1.27167e-85	1.34066	0.133	0.015	1.3383e-81	CN Neu
ENSG00000163539	3.70378e-85	1.20932	0.176	0.03	3.89785e-81	CN Neu
ENSG00000143153	1.79206e-84	1.11134	0.24	0.057	1.88596e-80	CN Neu
ENSG00000115365	4.44113e-82	1.38398	0.116	0.011	4.67385e-78	CN Neu
ENSG00000088387	3.96626e-81	1.38451	0.104	0.008	4.17409e-77	CN Neu
ENSG00000198712	2.12735e-79	-2.03997	0.093	0.36	2.23882e-75	CN Neu
ENSG00000070214	8.89937e-78	0.751489	0.529	0.242	9.3657e-74	CN Neu
ENSG00000010282	4.16004e-76	1.52062	0.141	0.021	4.37802e-72	CN Neu
ENSG00000165959	5.02249e-74	1.34413	0.131	0.018	5.28567e-70	CN Neu
ENSG00000127603	4.74568e-73	1.21715	0.153	0.026	4.99435e-69	CN Neu
ENSG00000109654	9.28495e-72	0.948952	0.216	0.054	9.77148e-68	CN Neu
ENSG00000105695	4.98207e-69	-1.12313	0.283	0.499	5.24313e-65	CN Neu
ENSG00000078269	4.49437e-68	1.24749	0.134	0.021	4.72987e-64	CN Neu
ENSG00000244754	1.69694e-67	0.750468	0.327	0.113	1.78586e-63	CN Neu
ENSG00000151150	3.43233e-67	1.03019	0.155	0.03	3.61218e-63	CN Neu
ENSG00000164327	6.18659e-67	1.13336	0.112	0.014	6.51077e-63	CN Neu
ENSG00000115524	8.63841e-67	1.31236	0.114	0.015	9.09107e-63	CN Neu
ENSG00000075292	9.87685e-67	1.26631	0.134	0.022	1.03944e-62	CN Neu
ENSG00000168297	1.34828e-66	1.1642	0.147	0.027	1.41893e-62	CN Neu
ENSG00000100142	1.65911e-66	0.984515	0.21	0.054	1.74605e-62	CN Neu
ENSG00000099331	1.90243e-66	1.35652	0.104	0.012	2.00212e-62	CN Neu
ENSG00000012124	3.90893e-64	1.40977	0.102	0.012	4.11376e-60	CN Neu
ENSG00000172508	2.06748e-63	0.829699	0.198	0.05	2.17581e-59	CN Neu
ENSG00000104904	6.05903e-62	1.11485	0.124	0.02	6.37652e-58	CN Neu
ENSG00000232112	2.69348e-61	1.24119	0.106	0.014	2.83462e-57	CN Neu
ENSG00000092964	1.64243e-59	-1.05583	0.261	0.47	1.72849e-55	CN Neu
ENSG00000150867	1.1577e-57	0.882927	0.163	0.038	1.21836e-53	CN Neu
ENSG00000132718	4.63466e-56	1.14495	0.11	0.017	4.87751e-52	CN Neu
ENSG00000169398	1.47501e-55	0.823394	0.177	0.046	1.5523e-51	CN Neu
ENSG00000139910	2.0267e-54	1.03939	0.125	0.024	2.1329e-50	CN Neu
ENSG00000065361	2.81904e-54	0.917055	0.173	0.045	2.96676e-50	CN Neu
ENSG00000197430	1.14261e-51	0.838136	0.153	0.037	1.20249e-47	CN Neu
ENSG00000179403	1.60005e-48	1.02018	0.115	0.023	1.6839e-44	CN Neu
ENSG00000075539	6.65065e-48	0.741806	0.225	0.077	6.99915e-44	CN Neu
ENSG00000118785	4.82631e-45	-0.696268	0.432	0.574	5.07921e-41	CN Neu
ENSG00000089041	1.49377e-44	1.04466	0.113	0.024	1.57204e-40	CN Neu
ENSG00000198938	1.79885e-44	-1.55355	0.131	0.315	1.89311e-40	CN Neu
ENSG00000134851	9.74928e-44	0.728372	0.199	0.066	1.02601e-39	CN Neu
ENSG00000105290	1.85537e-43	-0.845875	0.382	0.518	1.95259e-39	CN Neu
ENSG00000167641	2.13734e-43	-0.768664	0.417	0.549	2.24934e-39	CN Neu
ENSG00000132424	1.47579e-42	0.707833	0.235	0.089	1.55313e-38	CN Neu
ENSG00000127483	2.19469e-42	0.937874	0.155	0.045	2.3097e-38	CN Neu
ENSG00000166091	2.98124e-41	0.816947	0.118	0.028	3.13746e-37	CN Neu
ENSG00000196187	1.70478e-40	0.909638	0.155	0.046	1.79411e-36	CN Neu
ENSG00000198886	2.19257e-39	-1.56894	0.096	0.261	2.30746e-35	CN Neu
ENSG00000163817	3.78612e-39	-1.8993	0.027	0.175	3.98451e-35	CN Neu
ENSG00000204655	2.82293e-37	-1.01798	0.209	0.366	2.97085e-33	CN Neu
ENSG00000011426	1.97215e-35	0.772897	0.129	0.037	2.07549e-31	CN Neu
ENSG00000169045	1.05554e-34	0.891483	0.109	0.028	1.11085e-30	CN Neu
ENSG00000277363	6.22725e-34	0.810543	0.155	0.052	6.55356e-30	CN Neu
ENSG00000104833	2.18356e-33	-1.09438	0.154	0.304	2.29798e-29	CN Neu
ENSG00000198804	2.66292e-32	-1.43105	0.046	0.184	2.80246e-28	CN Neu
ENSG00000251349	4.90622e-32	-2.16933	0	0.109	5.1633e-28	CN Neu
ENSG00000258643	5.00577e-31	-2.17911	0	0.105	5.26807e-27	CN Neu
ENSG00000185883	7.36343e-31	-2.10036	0	0.105	7.74928e-27	CN Neu
ENSG00000151552	6.03812e-30	-0.766401	0.335	0.45	6.35451e-26	CN Neu
ENSG00000104419	7.40228e-26	-0.918002	0.196	0.321	7.79016e-22	CN Neu
ENSG00000087274	8.71913e-25	-1.1991	0.092	0.212	9.17601e-21	CN Neu
ENSG00000015592	1.85694e-24	-0.937419	0.18	0.302	1.95425e-20	CN Neu
ENSG00000120885	4.75986e-23	0.820278	0.12	0.045	5.00928e-19	CN Neu
ENSG00000198899	3.88159e-22	-1.23582	0.071	0.181	4.08499e-18	CN Neu
ENSG00000102934	9.12363e-21	-0.883346	0.179	0.286	9.60171e-17	CN Neu
ENSG00000108387	1.28616e-16	-0.754354	0.212	0.301	1.35355e-12	CN Neu
ENSG00000165476	1.8679e-16	-1.15291	0.05	0.132	1.96578e-12	CN Neu
ENSG00000159176	2.9061e-16	-0.753931	0.178	0.272	3.05838e-12	CN Neu
ENSG00000220205	8.30404e-16	-0.796064	0.176	0.266	8.73917e-12	CN Neu
ENSG00000039319	2.38477e-14	-0.835959	0.205	0.281	2.50973e-10	CN Neu
ENSG00000198763	4.19787e-14	-0.868121	0.066	0.146	4.41784e-10	CN Neu
ENSG00000168481	4.40719e-14	-0.869867	0.088	0.17	4.63813e-10	CN Neu
ENSG00000204248	8.06725e-14	-1.17794	0.046	0.117	8.48997e-10	CN Neu
ENSG00000047365	1.2939e-13	-0.735428	0.206	0.284	1.3617e-09	CN Neu
ENSG00000118515	3.6463e-13	-0.794516	0.107	0.188	3.83736e-09	CN Neu
ENSG00000169100	4.50035e-12	-1.08238	0.041	0.103	4.73617e-08	CN Neu
ENSG00000092621	1.16553e-11	-1.01198	0.044	0.105	1.22661e-07	CN Neu
ENSG00000010278	2.61909e-11	-0.704286	0.194	0.262	2.75633e-07	CN Neu
ENSG00000084207	4.49136e-10	-0.829354	0.11	0.173	4.72671e-06	CN Neu
ENSG00000185896	6.52831e-10	-0.700237	0.124	0.191	6.87039e-06	CN Neu
ENSG00000137221	1.5143e-09	-0.837451	0.108	0.169	1.59365e-05	CN Neu
ENSG00000069275	2.64208e-09	-0.754206	0.102	0.164	2.78052e-05	CN Neu
ENSG00000137872	3.37998e-09	-0.952973	0.062	0.116	3.55709e-05	CN Neu
ENSG00000166963	4.38822e-09	-0.8733	0.051	0.104	4.61816e-05	CN Neu
ENSG00000138593	9.51166e-09	-0.757658	0.101	0.159	0.000100101	CN Neu
ENSG00000001561	1.63993e-08	-0.832924	0.078	0.132	0.000172586	CN Neu
ENSG00000198755	3.12438e-08	-0.931296	0.071	0.122	0.00032881	CN Neu
ENSG00000049089	3.17688e-08	-0.876999	0.058	0.107	0.000334335	CN Neu
ENSG00000119917	2.94749e-07	-1.00642	0.064	0.109	0.00310193	CN Neu
ENSG00000108953	3.5343e-07	-0.749567	0.066	0.113	0.0037195	CN Neu
ENSG00000148700	4.83434e-07	-0.695321	0.132	0.182	0.00508766	CN Neu
ENSG00000138814	9.31777e-07	-0.777774	0.073	0.119	0.00980602	CN Neu
ENSG00000064042	4.41226e-06	-0.702253	0.085	0.128	0.0464346	CN Neu
ENSG00000113742	6.77068e-06	-0.699347	0.07	0.111	0.0712546	CN Neu
ENSG00000082996	1.09153e-05	-0.693492	0.104	0.144	0.114872	CN Neu
ENSG00000177156	4.22844e-05	-0.737694	0.073	0.108	0.445001	CN Neu
ENSG00000167996	4.51961e-140	2.73778	0.578	0.006	4.75643e-136	CN OD
ENSG00000185565	1.98442e-101	2.14548	0.523	0.032	2.08841e-97	CN OD
ENSG00000101489	8.62203e-98	2.31024	0.416	0.004	9.07383e-94	CN OD
ENSG00000178980	3.57219e-97	2.23932	0.398	0	3.75937e-93	CN OD
ENSG00000148053	3.73786e-93	2.37044	0.382	0	3.93372e-89	CN OD
ENSG00000100354	4.75302e-91	2.10591	0.462	0.024	5.00208e-87	CN OD
ENSG00000163682	1.55215e-81	2.07311	0.364	0.006	1.63349e-77	CN OD
ENSG00000260230	1.04389e-74	2.07481	0.315	0.001	1.09859e-70	CN OD
ENSG00000178568	2.90468e-74	2.0005	0.318	0.002	3.05688e-70	CN OD
ENSG00000171867	4.08231e-72	1.52554	0.52	0.066	4.29622e-68	CN OD
ENSG00000139970	3.46864e-71	1.39599	0.554	0.083	3.6504e-67	CN OD
ENSG00000187109	3.12901e-70	2.06885	0.315	0.005	3.29297e-66	CN OD
ENSG00000240694	1.65822e-67	1.98781	0.291	0.002	1.74511e-63	CN OD
ENSG00000196220	1.02126e-65	1.82499	0.284	0.002	1.07477e-61	CN OD
ENSG00000182389	2.15286e-64	1.94393	0.306	0.009	2.26567e-60	CN OD
ENSG00000117707	3.44798e-64	1.84032	0.278	0.002	3.62865e-60	CN OD
ENSG00000183775	7.32912e-62	1.72584	0.324	0.016	7.71317e-58	CN OD
ENSG00000188042	9.98793e-59	1.77705	0.251	0.001	1.05113e-54	CN OD
ENSG00000147481	5.01061e-58	1.69116	0.266	0.005	5.27317e-54	CN OD
ENSG00000077264	1.01208e-56	1.9682	0.263	0.006	1.06512e-52	CN OD
ENSG00000175893	6.68056e-56	1.66094	0.254	0.004	7.03062e-52	CN OD
ENSG00000156113	4.34407e-54	1.67034	0.294	0.017	4.57169e-50	CN OD
ENSG00000175161	5.82719e-54	1.70841	0.269	0.01	6.13253e-50	CN OD
ENSG00000145495	7.28954e-54	1.49613	0.339	0.031	7.67151e-50	CN OD
ENSG00000153944	1.24128e-53	1.66967	0.257	0.007	1.30632e-49	CN OD
ENSG00000155886	6.08015e-53	1.61119	0.266	0.01	6.39875e-49	CN OD
ENSG00000071082	9.70703e-52	1.62887	0.343	0.037	1.02157e-47	CN OD
ENSG00000104904	9.79342e-52	1.36709	0.385	0.052	1.03066e-47	CN OD
ENSG00000186310	1.17698e-51	1.73522	0.263	0.011	1.23866e-47	CN OD
ENSG00000115977	2.59302e-51	1.59216	0.303	0.023	2.72889e-47	CN OD
ENSG00000163531	8.51196e-51	1.62147	0.223	0.002	8.95798e-47	CN OD
ENSG00000112379	8.59007e-51	1.58454	0.235	0.005	9.04019e-47	CN OD
ENSG00000152578	1.79019e-48	1.42345	0.385	0.057	1.88399e-44	CN OD
ENSG00000171858	1.33174e-47	1.73949	0.205	0.001	1.40153e-43	CN OD
ENSG00000078018	7.58942e-47	1.18046	0.422	0.074	7.98711e-43	CN OD
ENSG00000116106	4.44822e-46	1.31066	0.321	0.036	4.68131e-42	CN OD
ENSG00000111371	5.77888e-46	1.56821	0.239	0.011	6.0817e-42	CN OD
ENSG00000185883	7.07538e-46	-3.0045	0	0.437	7.44613e-42	CN OD
ENSG00000005108	1.67401e-45	1.42526	0.297	0.029	1.76173e-41	CN OD
ENSG00000115310	8.31496e-45	0.944733	0.642	0.195	8.75067e-41	CN OD
ENSG00000124406	1.88098e-44	1.4593	0.294	0.03	1.97955e-40	CN OD
ENSG00000083067	9.29027e-44	1.42107	0.199	0.003	9.77708e-40	CN OD
ENSG00000172461	2.03649e-43	1.54608	0.193	0.002	2.1432e-39	CN OD
ENSG00000152377	6.3125e-43	1.33279	0.336	0.049	6.64327e-39	CN OD
ENSG00000116754	3.71189e-42	1.35875	0.367	0.064	3.9064e-38	CN OD
ENSG00000178662	4.46038e-41	1.479	0.214	0.01	4.6941e-37	CN OD
ENSG00000105993	5.82378e-41	1.49938	0.214	0.01	6.12895e-37	CN OD
ENSG00000021645	2.09045e-40	1.40288	0.266	0.026	2.19999e-36	CN OD
ENSG00000171105	2.81103e-40	1.6006	0.174	0.001	2.95833e-36	CN OD
ENSG00000118473	3.03097e-40	1.50387	0.174	0.001	3.18979e-36	CN OD
ENSG00000140538	4.11768e-40	1.2479	0.281	0.032	4.33345e-36	CN OD
ENSG00000184226	4.01654e-39	1.41149	0.336	0.057	4.22701e-35	CN OD
ENSG00000176102	6.25913e-39	1.33577	0.199	0.008	6.58711e-35	CN OD
ENSG00000242265	8.99458e-39	1.58411	0.18	0.004	9.46589e-35	CN OD
ENSG00000148408	1.79528e-38	1.37411	0.18	0.004	1.88935e-34	CN OD
ENSG00000089280	3.23117e-38	1.26698	0.306	0.045	3.40048e-34	CN OD
ENSG00000143153	4.18789e-38	0.949682	0.749	0.35	4.40733e-34	CN OD
ENSG00000156052	5.08104e-38	1.46748	0.165	0.001	5.34728e-34	CN OD
ENSG00000166501	5.30828e-38	1.47583	0.165	0.001	5.58643e-34	CN OD
ENSG00000133687	5.28429e-37	1.40356	0.156	0	5.56119e-33	CN OD
ENSG00000144366	1.0568e-36	1.32669	0.239	0.023	1.11217e-32	CN OD
ENSG00000176884	1.66397e-36	0.762843	0.495	0.128	1.75116e-32	CN OD
ENSG00000156411	2.45831e-36	1.25308	0.269	0.034	2.58713e-32	CN OD
ENSG00000166619	2.76317e-36	1.35706	0.153	0	2.90796e-32	CN OD
ENSG00000145741	2.76317e-36	1.35411	0.153	0	2.90796e-32	CN OD
ENSG00000165152	2.76317e-36	1.29615	0.153	0	2.90796e-32	CN OD
ENSG00000187957	2.84207e-36	1.259	0.257	0.029	2.991e-32	CN OD
ENSG00000010244	3.89603e-36	1.22216	0.272	0.036	4.10018e-32	CN OD
ENSG00000106771	6.97704e-36	1.39904	0.18	0.007	7.34263e-32	CN OD
ENSG00000232112	1.1374e-35	1.33827	0.287	0.043	1.197e-31	CN OD
ENSG00000142192	1.19673e-35	0.858451	0.52	0.15	1.25944e-31	CN OD
ENSG00000172292	1.44156e-35	1.41089	0.15	0	1.5171e-31	CN OD
ENSG00000109472	1.84473e-35	1.20102	0.306	0.05	1.94139e-31	CN OD
ENSG00000183715	2.9471e-35	1.3199	0.153	0.001	3.10152e-31	CN OD
ENSG00000150471	3.39893e-35	1.3888	0.162	0.003	3.57703e-31	CN OD
ENSG00000106460	9.27991e-35	1.27553	0.223	0.02	9.76618e-31	CN OD
ENSG00000173611	9.44332e-35	1.26827	0.156	0.002	9.93815e-31	CN OD
ENSG00000258643	9.77372e-35	-2.56305	0	0.351	1.02859e-30	CN OD
ENSG00000204406	2.05064e-34	1.24206	0.15	0.001	2.1581e-30	CN OD
ENSG00000091592	3.89697e-34	1.31677	0.144	0	4.10117e-30	CN OD
ENSG00000136238	1.7105e-33	1.30977	0.159	0.004	1.80013e-29	CN OD
ENSG00000174080	2.01932e-33	1.27048	0.141	0	2.12513e-29	CN OD
ENSG00000107864	2.01932e-33	1.3147	0.141	0	2.12514e-29	CN OD
ENSG00000250305	4.72634e-33	1.29532	0.165	0.006	4.974e-29	CN OD
ENSG00000144406	7.61423e-33	1.11758	0.26	0.037	8.01321e-29	CN OD
ENSG00000106261	8.02041e-33	1.19891	0.165	0.006	8.44068e-29	CN OD
ENSG00000183023	9.64377e-33	1.12468	0.278	0.044	1.01491e-28	CN OD
ENSG00000065923	1.04403e-32	1.28004	0.138	0	1.09874e-28	CN OD
ENSG00000181722	1.26658e-32	1.37308	0.223	0.025	1.33295e-28	CN OD
ENSG00000198625	3.19686e-32	1.21564	0.235	0.029	3.36438e-28	CN OD
ENSG00000169554	4.9329e-32	1.04506	0.239	0.029	5.19138e-28	CN OD
ENSG00000184992	5.38586e-32	1.23235	0.135	0	5.66808e-28	CN OD
ENSG00000124006	8.52582e-32	1.16341	0.226	0.026	8.97257e-28	CN OD
ENSG00000126070	1.25255e-31	1.17807	0.211	0.021	1.31819e-27	CN OD
ENSG00000131584	1.43014e-31	1.41183	0.138	0.001	1.50508e-27	CN OD
ENSG00000157741	2.22188e-31	1.26586	0.187	0.014	2.3383e-27	CN OD
ENSG00000155093	2.38011e-31	1.17631	0.15	0.004	2.50482e-27	CN OD
ENSG00000128585	2.77229e-31	1.236	0.131	0	2.91756e-27	CN OD
ENSG00000185787	3.94164e-31	1.22977	0.269	0.045	4.14818e-27	CN OD
ENSG00000204217	4.39409e-31	1.22139	0.153	0.005	4.62434e-27	CN OD
ENSG00000157064	6.40849e-31	1.2785	0.135	0.001	6.74429e-27	CN OD
ENSG00000101290	6.58228e-31	1.26721	0.156	0.006	6.92719e-27	CN OD
ENSG00000241343	7.29677e-31	1.19718	0.135	0.001	7.67912e-27	CN OD
ENSG00000145990	1.5625e-30	1.18433	0.138	0.002	1.64437e-26	CN OD
ENSG00000182256	1.81595e-30	1.14452	0.138	0.002	1.91111e-26	CN OD
ENSG00000168000	4.94894e-30	-2.24993	0.021	0.339	5.20826e-26	CN OD
ENSG00000151067	7.2971e-30	1.28555	0.125	0	7.67947e-26	CN OD
ENSG00000134852	1.15099e-29	1.23775	0.15	0.006	1.2113e-25	CN OD
ENSG00000164327	1.50793e-29	1.13718	0.205	0.023	1.58695e-25	CN OD
ENSG00000170500	1.66345e-29	1.11185	0.235	0.033	1.75061e-25	CN OD
ENSG00000189337	1.7624e-29	1.22186	0.153	0.007	1.85475e-25	CN OD
ENSG00000162989	1.76314e-29	1.22078	0.128	0.001	1.85553e-25	CN OD
ENSG00000154678	3.52939e-29	1.32956	0.131	0.002	3.71433e-25	CN OD
ENSG00000197121	3.63687e-29	1.21262	0.131	0.002	3.82744e-25	CN OD
ENSG00000197959	4.38025e-29	1.01165	0.251	0.04	4.60977e-25	CN OD
ENSG00000152154	5.61505e-29	0.91342	0.229	0.032	5.90928e-25	CN OD
ENSG00000160551	1.07211e-28	1.26809	0.174	0.014	1.12829e-24	CN OD
ENSG00000152932	1.27257e-28	1.2571	0.153	0.008	1.33925e-24	CN OD
ENSG00000115875	1.70264e-28	0.999628	0.232	0.034	1.79186e-24	CN OD
ENSG00000173933	1.90422e-28	1.10589	0.119	0	2.004e-24	CN OD
ENSG00000132932	2.076e-28	1.18914	0.156	0.009	2.18478e-24	CN OD
ENSG00000102466	3.694e-28	1.21473	0.131	0.003	3.88757e-24	CN OD
ENSG00000143322	4.89618e-28	1.18043	0.122	0.001	5.15274e-24	CN OD
ENSG00000060982	5.17462e-28	0.97884	0.122	0.001	5.44577e-24	CN OD
ENSG00000115365	9.98787e-28	1.01067	0.196	0.022	1.05112e-23	CN OD
ENSG00000198363	1.73427e-27	1.14202	0.242	0.041	1.82515e-23	CN OD
ENSG00000185008	1.79209e-27	0.873286	0.327	0.078	1.88599e-23	CN OD
ENSG00000107331	2.35645e-27	1.17538	0.128	0.003	2.47993e-23	CN OD
ENSG00000123908	2.54772e-27	1.23083	0.119	0.001	2.68122e-23	CN OD
ENSG00000127922	4.92715e-27	1.09171	0.113	0	5.18533e-23	CN OD
ENSG00000160613	6.96524e-27	1.00007	0.153	0.01	7.33022e-23	CN OD
ENSG00000149212	7.1037e-27	1.18681	0.135	0.005	7.47593e-23	CN OD
ENSG00000082153	1.05171e-26	1.10621	0.159	0.012	1.10682e-22	CN OD
ENSG00000177432	1.07025e-26	0.982715	0.125	0.003	1.12633e-22	CN OD
ENSG00000118922	1.29863e-26	1.12905	0.116	0.001	1.36668e-22	CN OD
ENSG00000134324	1.79875e-26	1.10952	0.18	0.019	1.893e-22	CN OD
ENSG00000141279	1.80324e-26	1.07295	0.19	0.022	1.89773e-22	CN OD
ENSG00000089169	2.0708e-26	1.14009	0.141	0.007	2.17931e-22	CN OD
ENSG00000182667	2.21716e-26	1.32392	0.147	0.009	2.33334e-22	CN OD
ENSG00000146433	2.80946e-26	0.973218	0.119	0.002	2.95668e-22	CN OD
ENSG00000153933	2.8515e-26	1.14001	0.119	0.002	3.00092e-22	CN OD
ENSG00000115355	4.02865e-26	0.770796	0.324	0.078	4.23976e-22	CN OD
ENSG00000102910	4.07787e-26	1.05124	0.187	0.022	4.29155e-22	CN OD
ENSG00000129625	5.04203e-26	1.1	0.223	0.037	5.30623e-22	CN OD
ENSG00000134313	7.50448e-26	0.903123	0.336	0.086	7.89771e-22	CN OD
ENSG00000163596	9.97287e-26	1.08623	0.125	0.004	1.04954e-21	CN OD
ENSG00000135541	1.37515e-25	0.860733	0.434	0.149	1.44721e-21	CN OD
ENSG00000213639	2.81947e-25	1.21552	0.183	0.023	2.96721e-21	CN OD
ENSG00000007237	3.25128e-25	1.18487	0.11	0.001	3.42164e-21	CN OD
ENSG00000169933	6.38504e-25	1.05558	0.104	0	6.71961e-21	CN OD
ENSG00000175497	6.97256e-25	1.04994	0.138	0.008	7.33792e-21	CN OD
ENSG00000038382	7.68961e-25	1.08781	0.113	0.002	8.09254e-21	CN OD
ENSG00000244754	8.58375e-25	0.729547	0.599	0.279	9.03354e-21	CN OD
ENSG00000219200	8.65897e-25	-2.20957	0.009	0.277	9.1127e-21	CN OD
ENSG00000169967	1.43088e-24	1.05448	0.107	0.001	1.50586e-20	CN OD
ENSG00000076641	1.57776e-24	1.07925	0.107	0.001	1.66043e-20	CN OD
ENSG00000088387	2.28796e-24	1.04471	0.119	0.004	2.40784e-20	CN OD
ENSG00000136099	2.75603e-24	0.839929	0.26	0.054	2.90045e-20	CN OD
ENSG00000176165	3.21806e-24	1.16313	0.101	0	3.38669e-20	CN OD
ENSG00000142235	3.21807e-24	1.09636	0.101	0	3.3867e-20	CN OD
ENSG00000100201	3.53209e-24	-0.98635	0.532	0.685	3.71717e-20	CN OD
ENSG00000090863	3.59626e-24	1.2328	0.15	0.013	3.78471e-20	CN OD
ENSG00000104290	3.65154e-24	1.17808	0.183	0.025	3.84288e-20	CN OD
ENSG00000165300	6.7041e-24	1.10527	0.15	0.013	7.05539e-20	CN OD
ENSG00000179915	6.82335e-24	1.06907	0.202	0.032	7.1809e-20	CN OD
ENSG00000126351	7.99674e-24	1.01772	0.159	0.016	8.41577e-20	CN OD
ENSG00000197323	1.69335e-23	0.884841	0.251	0.053	1.78208e-19	CN OD
ENSG00000196233	1.7952e-23	1.15277	0.141	0.011	1.88927e-19	CN OD
ENSG00000134759	2.12529e-23	0.960622	0.177	0.023	2.23666e-19	CN OD
ENSG00000049618	2.29352e-23	0.910394	0.287	0.071	2.4137e-19	CN OD
ENSG00000050438	2.82654e-23	0.911454	0.153	0.015	2.97465e-19	CN OD
ENSG00000163590	3.12788e-23	1.0374	0.11	0.003	3.29178e-19	CN OD
ENSG00000154122	3.69757e-23	0.951859	0.171	0.021	3.89132e-19	CN OD
ENSG00000114279	3.97379e-23	0.91859	0.11	0.003	4.18201e-19	CN OD
ENSG00000116871	4.19674e-23	1.06213	0.101	0.001	4.41665e-19	CN OD
ENSG00000162409	4.25328e-23	0.890587	0.156	0.016	4.47615e-19	CN OD
ENSG00000185046	7.23972e-23	0.798154	0.257	0.056	7.61908e-19	CN OD
ENSG00000132718	8.12067e-23	0.927741	0.254	0.057	8.54619e-19	CN OD
ENSG00000151893	2.51952e-22	1.07957	0.11	0.004	2.65154e-18	CN OD
ENSG00000080644	4.74833e-22	1.07221	0.113	0.005	4.99714e-18	CN OD
ENSG00000107281	6.4422e-22	0.739659	0.309	0.085	6.77977e-18	CN OD
ENSG00000229415	7.52253e-22	0.951979	0.116	0.006	7.91671e-18	CN OD
ENSG00000008056	7.71325e-22	1.14867	0.156	0.019	8.11742e-18	CN OD
ENSG00000168952	9.41438e-22	1.07628	0.104	0.003	9.9077e-18	CN OD
ENSG00000113387	9.45959e-22	0.850106	0.248	0.056	9.95528e-18	CN OD
ENSG00000166848	1.15333e-21	0.98694	0.251	0.059	1.21376e-17	CN OD
ENSG00000162599	1.51872e-21	1.11627	0.107	0.004	1.5983e-17	CN OD
ENSG00000163539	1.57456e-21	0.824209	0.278	0.071	1.65707e-17	CN OD
ENSG00000113441	1.77463e-21	1.05707	0.11	0.005	1.86762e-17	CN OD
ENSG00000084710	2.11274e-21	0.930745	0.147	0.016	2.22345e-17	CN OD
ENSG00000146416	3.01822e-21	0.939379	0.165	0.023	3.17637e-17	CN OD
ENSG00000152291	3.24845e-21	0.999834	0.162	0.022	3.41867e-17	CN OD
ENSG00000100320	4.53625e-21	0.913763	0.232	0.052	4.77395e-17	CN OD
ENSG00000178104	5.22606e-21	1.14981	0.138	0.014	5.49991e-17	CN OD
ENSG00000102409	7.55234e-21	0.7325	0.242	0.054	7.94808e-17	CN OD
ENSG00000035862	1.1771e-20	0.956209	0.217	0.046	1.23878e-16	CN OD
ENSG00000151150	1.20579e-20	0.81629	0.232	0.052	1.26897e-16	CN OD
ENSG00000116005	2.4721e-20	1.11086	0.138	0.015	2.60164e-16	CN OD
ENSG00000177511	2.56944e-20	1.02571	0.119	0.009	2.70408e-16	CN OD
ENSG00000054523	2.7318e-20	0.865024	0.245	0.06	2.87494e-16	CN OD
ENSG00000235194	2.95402e-20	0.923283	0.101	0.004	3.10881e-16	CN OD
ENSG00000023228	3.73249e-20	0.939366	0.128	0.012	3.92808e-16	CN OD
ENSG00000128699	3.74245e-20	0.832148	0.141	0.016	3.93855e-16	CN OD
ENSG00000100731	3.94031e-20	0.882027	0.101	0.004	4.14678e-16	CN OD
ENSG00000112902	3.94031e-20	0.851081	0.101	0.004	4.14678e-16	CN OD
ENSG00000188811	4.35634e-20	0.927725	0.177	0.03	4.58461e-16	CN OD
ENSG00000115524	7.46343e-20	0.704334	0.242	0.057	7.85451e-16	CN OD
ENSG00000040933	7.61711e-20	0.890847	0.147	0.019	8.01624e-16	CN OD
ENSG00000109606	9.20348e-20	0.954048	0.113	0.008	9.68574e-16	CN OD
ENSG00000176463	9.37477e-20	0.987898	0.11	0.007	9.86601e-16	CN OD
ENSG00000224877	1.72197e-19	0.854981	0.119	0.01	1.81221e-15	CN OD
ENSG00000094916	1.95565e-19	0.952929	0.135	0.015	2.05812e-15	CN OD
ENSG00000140526	2.58803e-19	0.881181	0.101	0.005	2.72364e-15	CN OD
ENSG00000153707	2.84582e-19	1.17354	0.144	0.019	2.99494e-15	CN OD
ENSG00000169057	5.89403e-19	1.0059	0.113	0.009	6.20288e-15	CN OD
ENSG00000133114	5.90914e-19	0.895009	0.11	0.008	6.21878e-15	CN OD
ENSG00000151276	7.0612e-19	0.854134	0.174	0.031	7.43121e-15	CN OD
ENSG00000011295	7.14351e-19	0.802469	0.171	0.03	7.51783e-15	CN OD
ENSG00000168546	8.85666e-19	0.969053	0.135	0.016	9.32074e-15	CN OD
ENSG00000138398	9.63566e-19	0.812585	0.196	0.041	1.01406e-14	CN OD
ENSG00000109158	1.45208e-18	0.949355	0.101	0.006	1.52817e-14	CN OD
ENSG00000077147	1.51044e-18	0.839271	0.147	0.021	1.58959e-14	CN OD
ENSG00000139746	1.71558e-18	0.810632	0.211	0.049	1.80547e-14	CN OD
ENSG00000025800	1.891e-18	0.921967	0.135	0.017	1.99009e-14	CN OD
ENSG00000114631	2.27782e-18	0.862862	0.22	0.053	2.39718e-14	CN OD
ENSG00000055917	2.30285e-18	0.871044	0.138	0.018	2.42352e-14	CN OD
ENSG00000143376	2.44799e-18	0.880061	0.135	0.017	2.57626e-14	CN OD
ENSG00000144369	2.9192e-18	0.996825	0.18	0.036	3.07216e-14	CN OD
ENSG00000132300	3.48833e-18	1.00713	0.116	0.011	3.67111e-14	CN OD
ENSG00000089916	4.20316e-18	0.81926	0.119	0.012	4.4234e-14	CN OD
ENSG00000011052	5.33003e-18	-1.94743	0	0.197	5.60932e-14	CN OD
ENSG00000164176	5.48962e-18	0.793692	0.211	0.049	5.77728e-14	CN OD
ENSG00000127328	5.60033e-18	0.728417	0.343	0.121	5.89378e-14	CN OD
ENSG00000115306	5.88197e-18	0.746585	0.159	0.027	6.19019e-14	CN OD
ENSG00000075391	6.2368e-18	0.899224	0.159	0.027	6.56361e-14	CN OD
ENSG00000107863	7.18671e-18	0.957535	0.131	0.017	7.56329e-14	CN OD
ENSG00000135924	7.79887e-18	0.98206	0.18	0.037	8.20753e-14	CN OD
ENSG00000172667	9.23063e-18	0.948373	0.101	0.007	9.71431e-14	CN OD
ENSG00000110911	9.69734e-18	0.831424	0.138	0.019	1.02055e-13	CN OD
ENSG00000187122	1.15574e-17	0.743835	0.187	0.039	1.2163e-13	CN OD
ENSG00000115525	1.22528e-17	0.859072	0.128	0.016	1.28948e-13	CN OD
ENSG00000167468	1.30088e-17	0.782015	0.254	0.072	1.36904e-13	CN OD
ENSG00000130294	2.68357e-17	0.717041	0.202	0.048	2.82419e-13	CN OD
ENSG00000166405	2.81103e-17	0.761256	0.144	0.022	2.95833e-13	CN OD
ENSG00000166780	2.87559e-17	0.764591	0.153	0.026	3.02627e-13	CN OD
ENSG00000175130	3.32315e-17	0.825695	0.174	0.035	3.49729e-13	CN OD
ENSG00000155099	7.63007e-17	0.780765	0.107	0.01	8.02988e-13	CN OD
ENSG00000136267	9.15968e-17	0.725522	0.113	0.012	9.63964e-13	CN OD
ENSG00000155744	1.03645e-16	0.788658	0.193	0.045	1.09076e-12	CN OD
ENSG00000073803	1.50432e-16	0.789735	0.131	0.019	1.58315e-12	CN OD
ENSG00000145349	1.94014e-16	0.896013	0.128	0.018	2.0418e-12	CN OD
ENSG00000197872	1.94806e-16	0.843329	0.141	0.023	2.05014e-12	CN OD
ENSG00000133083	1.97322e-16	0.86278	0.187	0.044	2.07662e-12	CN OD
ENSG00000108256	1.97495e-16	0.934421	0.104	0.01	2.07844e-12	CN OD
ENSG00000156642	2.05909e-16	0.793921	0.153	0.028	2.16698e-12	CN OD
ENSG00000054356	2.21286e-16	0.830471	0.177	0.039	2.32881e-12	CN OD
ENSG00000198162	3.54782e-16	0.845734	0.131	0.02	3.73372e-12	CN OD
ENSG00000065609	4.44664e-16	0.712384	0.183	0.041	4.67964e-12	CN OD
ENSG00000106772	7.71046e-16	0.785886	0.119	0.016	8.11449e-12	CN OD
ENSG00000059588	9.95649e-16	0.838426	0.156	0.031	1.04782e-11	CN OD
ENSG00000196323	1.06927e-15	0.770858	0.159	0.032	1.1253e-11	CN OD
ENSG00000079246	1.19657e-15	0.887564	0.144	0.026	1.25927e-11	CN OD
ENSG00000184702	1.28007e-15	-1.85829	0	0.172	1.34715e-11	CN OD
ENSG00000261609	1.46893e-15	0.807159	0.101	0.01	1.5459e-11	CN OD
ENSG00000178252	1.85212e-15	0.852698	0.15	0.029	1.94917e-11	CN OD
ENSG00000084764	1.92051e-15	0.773049	0.15	0.029	2.02114e-11	CN OD
ENSG00000175874	2.67143e-15	0.79663	0.119	0.017	2.81142e-11	CN OD
ENSG00000070413	2.97025e-15	0.904395	0.131	0.022	3.12589e-11	CN OD
ENSG00000167733	3.19062e-15	0.800863	0.107	0.013	3.35781e-11	CN OD
ENSG00000111906	3.22308e-15	0.794768	0.113	0.015	3.39197e-11	CN OD
ENSG00000120265	4.89271e-15	0.780371	0.125	0.02	5.14909e-11	CN OD
ENSG00000074935	6.47602e-15	0.719387	0.128	0.021	6.81537e-11	CN OD
ENSG00000144224	7.54553e-15	0.827594	0.116	0.017	7.94091e-11	CN OD
ENSG00000138095	9.10838e-15	0.805557	0.116	0.017	9.58566e-11	CN OD
ENSG00000197971	1.28035e-14	0.790032	0.15	0.031	1.34744e-10	CN OD
ENSG00000119396	1.77972e-14	0.701315	0.11	0.015	1.87298e-10	CN OD
ENSG00000105429	1.95579e-14	0.779445	0.119	0.019	2.05827e-10	CN OD
ENSG00000251503	3.30592e-14	-3.66956	0.012	0.177	3.47915e-10	CN OD
ENSG00000070214	4.15306e-14	0.697784	0.196	0.054	4.37068e-10	CN OD
ENSG00000139496	5.92625e-14	0.865891	0.101	0.013	6.23679e-10	CN OD
ENSG00000131966	6.49384e-14	0.827523	0.116	0.019	6.83412e-10	CN OD
ENSG00000185052	7.54919e-14	0.701826	0.147	0.031	7.94477e-10	CN OD
ENSG00000123933	9.412e-14	0.801951	0.116	0.019	9.90519e-10	CN OD
ENSG00000196683	1.01232e-13	0.720466	0.226	0.072	1.06537e-09	CN OD
ENSG00000091164	1.18794e-13	0.82992	0.11	0.017	1.25019e-09	CN OD
ENSG00000198265	1.50939e-13	0.696266	0.18	0.049	1.58848e-09	CN OD
ENSG00000135525	3.05171e-13	0.809336	0.168	0.044	3.21162e-09	CN OD
ENSG00000213047	5.83291e-13	0.747364	0.116	0.021	6.13856e-09	CN OD
ENSG00000150938	6.6628e-13	0.757441	0.128	0.026	7.01193e-09	CN OD
ENSG00000197535	1.6295e-12	0.787972	0.104	0.017	1.71489e-08	CN OD
ENSG00000146281	1.65909e-12	0.768781	0.104	0.017	1.74602e-08	CN OD
ENSG00000124588	3.92271e-12	0.698	0.128	0.028	4.12826e-08	CN OD
ENSG00000101546	5.07381e-12	0.705431	0.107	0.019	5.33968e-08	CN OD
ENSG00000109906	1.69496e-11	-1.51177	0.049	0.201	1.78378e-07	CN OD
ENSG00000166598	1.81519e-11	0.699202	0.205	0.072	1.9103e-07	CN OD
ENSG00000115839	2.278e-11	0.741945	0.125	0.029	2.39737e-07	CN OD
ENSG00000181790	5.06551e-11	0.907315	0.116	0.026	5.33094e-07	CN OD
ENSG00000108848	5.23522e-11	-0.694754	0.48	0.566	5.50954e-07	CN OD
ENSG00000139372	5.86146e-11	0.696475	0.144	0.039	6.1686e-07	CN OD
ENSG00000144029	6.20549e-11	0.81366	0.107	0.022	6.53066e-07	CN OD
ENSG00000145194	1.14931e-10	-1.60372	0	0.116	1.20954e-06	CN OD
ENSG00000082212	1.46101e-10	0.698594	0.101	0.02	1.53757e-06	CN OD
ENSG00000244588	1.71281e-10	-1.50883	0	0.114	1.80256e-06	CN OD
ENSG00000166313	2.27906e-10	0.748311	0.131	0.035	2.39848e-06	CN OD
ENSG00000065135	2.39702e-10	0.695092	0.101	0.021	2.52263e-06	CN OD
ENSG00000269955	5.63423e-10	-1.33704	0	0.108	5.92947e-06	CN OD
ENSG00000125827	8.12174e-10	0.728127	0.138	0.04	8.54732e-06	CN OD
ENSG00000004059	8.14725e-10	-1.10773	0.086	0.233	8.57416e-06	CN OD
ENSG00000198804	9.16222e-10	-1.34614	0.116	0.273	9.64232e-06	CN OD
ENSG00000033122	1.33047e-09	0.721364	0.104	0.024	1.40018e-05	CN OD
ENSG00000204599	2.10665e-09	-1.31853	0.006	0.113	2.21704e-05	CN OD
ENSG00000242028	1.59276e-08	-1.18905	0.018	0.125	0.000167622	CN OD
ENSG00000110429	7.04518e-08	0.767044	0.131	0.045	0.000741435	CN OD
ENSG00000169228	8.7703e-08	-1.0368	0.058	0.175	0.000922986	CN OD
ENSG00000182768	2.63194e-07	-0.979152	0.061	0.174	0.00276985	CN OD
ENSG00000240972	3.09339e-07	-1.03304	0.138	0.256	0.00325548	CN OD
ENSG00000105649	5.78047e-07	-0.893976	0.211	0.317	0.00608337	CN OD
ENSG00000237441	8.1962e-07	-1.07695	0.046	0.145	0.00862568	CN OD
ENSG00000090238	1.36394e-06	-0.858149	0.193	0.299	0.0143542	CN OD
ENSG00000122585	1.40857e-06	-1.97739	0.04	0.133	0.0148238	CN OD
ENSG00000168993	1.96337e-06	-1.08348	0.113	0.217	0.0206625	CN OD
ENSG00000183036	2.24324e-06	-1.10831	0.199	0.301	0.0236079	CN OD
ENSG00000162065	4.74364e-06	-1.02274	0.08	0.179	0.0499221	CN OD
ENSG00000124507	6.21356e-06	-1.00516	0.073	0.169	0.0653915	CN OD
ENSG00000090097	1.34139e-05	-0.934616	0.095	0.191	0.141168	CN OD
ENSG00000076864	3.16548e-05	-1.08036	0.086	0.176	0.333135	CN OD
ENSG00000169100	3.28745e-05	-0.817689	0.147	0.239	0.345971	CN OD
ENSG00000090861	3.7296e-05	-0.86682	0.058	0.139	0.392503	CN OD
ENSG00000135390	4.38765e-05	-0.772114	0.15	0.241	0.461756	CN OD
ENSG00000198712	0.000114117	-1.66472	0.174	0.262	1	CN OD
ENSG00000166963	0.000236215	-0.790712	0.15	0.227	1	CN OD
ENSG00000185024	0.000302328	-0.819148	0.061	0.131	1	CN OD
ENSG00000106211	0.00057366	-1.34409	0.052	0.114	1	CN OD
ENSG00000101654	0.000577652	-0.735358	0.251	0.305	1	CN OD
ENSG00000162188	0.000582957	-0.697614	0.141	0.215	1	CN OD
ENSG00000071242	0.000707762	-0.800115	0.058	0.12	1	CN OD
ENSG00000109107	0.000862378	-0.855968	0.107	0.173	1	CN OD
ENSG00000162688	0.000995191	-0.881307	0.089	0.152	1	CN OD
ENSG00000109670	0.00104947	-0.787574	0.101	0.166	1	CN OD
ENSG00000137815	0.00125027	-0.694605	0.135	0.205	1	CN OD
ENSG00000175352	0.00136339	-0.840256	0.092	0.154	1	CN OD
ENSG00000163463	0.00141157	-0.810382	0.052	0.108	1	CN OD
ENSG00000184752	0.00146575	-0.783143	0.083	0.144	1	CN OD
ENSG00000137100	0.00151307	-0.758633	0.073	0.134	1	CN OD
ENSG00000141522	0.00160688	-0.791669	0.052	0.108	1	CN OD
ENSG00000145734	0.00213729	-0.717276	0.101	0.161	1	CN OD
ENSG00000106992	0.00241211	-0.76227	0.055	0.108	1	CN OD
ENSG00000015592	0.00282705	-0.707152	0.104	0.164	1	CN OD
ENSG00000165716	0.00329577	-0.791462	0.07	0.124	1	CN OD
ENSG00000157005	0.00359562	-1.96897	0.101	0.155	1	CN OD
ENSG00000116991	0.00425265	-0.7782	0.073	0.125	1	CN OD
ENSG00000143847	0.00484611	-0.814124	0.073	0.123	1	CN OD
ENSG00000213619	0.00509013	-0.744852	0.055	0.103	1	CN OD
ENSG00000101460	0.00709433	-0.705947	0.214	0.258	1	CN OD
ENSG00000100151	0.00840812	-0.69994	0.058	0.103	1	CN OD
ENSG00000134825	0.00881629	-0.704077	0.089	0.137	1	CN OD
ENSG00000184983	0.00986166	-0.737825	0.07	0.116	1	CN OD
ENSG00000060491	0.00997183	-0.748828	0.061	0.106	1	CN OD
ENSG00000068400	0.0100219	-0.732666	0.064	0.108	1	CN OD
ENSG00000132872	0.0117138	-0.712858	0.153	0.2	1	CN OD
ENSG00000164919	0.0120177	-0.699639	0.205	0.247	1	CN OD
ENSG00000135018	0.0133238	-0.82998	0.064	0.106	1	CN OD
ENSG00000174996	0.0204743	-0.741671	0.073	0.113	1	CN OD
ENSG00000175197	0.0236594	-0.743986	0.067	0.106	1	CN OD
ENSG00000102878	0.0294512	-0.72164	0.095	0.132	1	CN OD
ENSG00000126457	0.0496173	-0.704712	0.101	0.134	1	CN OD
ENSG00000109846	0.0697817	-0.850208	0.116	0.147	1	CN OD
ENSG00000198938	0.103861	-1.10818	0.214	0.243	1	CN OD
ENSG00000198899	0.350999	-1.30099	0.092	0.105	1	CN OD
ENSG00000198763	0.605548	-0.736093	0.11	0.118	1	CN OD
ENSG00000166710	0.644911	-0.977378	0.217	0.199	1	CN OD
ENSG00000198886	0.676817	-0.835048	0.159	0.16	1	CN OD
ENSG00000166501	0	3.09117	0.656	0.006	0	CN Ast
ENSG00000167996	0	2.81352	0.595	0.006	0	CN Ast
ENSG00000147481	0	2.62175	0.535	0.009	0	CN Ast
ENSG00000131584	0	2.41799	0.448	0.001	0	CN Ast
ENSG00000182389	0	2.40112	0.513	0.009	0	CN Ast
ENSG00000187109	0	2.35263	0.528	0.012	0	CN Ast
ENSG00000101489	0	2.26987	0.411	0.002	0	CN Ast
ENSG00000178980	0	2.21728	0.389	0.002	0	CN Ast
ENSG00000152402	0	2.18158	0.398	0.002	0	CN Ast
ENSG00000100354	0	2.17556	0.482	0.016	0	CN Ast
ENSG00000071082	0	2.15584	0.576	0.074	0	CN Ast
ENSG00000134146	0	2.07313	0.345	0.004	0	CN Ast
ENSG00000241343	0	1.97945	0.23	0.002	0	CN Ast
ENSG00000112541	0	1.97535	0.448	0.026	0	CN Ast
ENSG00000260230	0	1.92107	0.33	0.004	0	CN Ast
ENSG00000163682	0	1.87446	0.294	0.004	0	CN Ast
ENSG00000119547	0	1.86309	0.527	0.06	0	CN Ast
ENSG00000118473	0	1.84272	0.342	0.01	0	CN Ast
ENSG00000122012	0	1.84246	0.316	0.007	0	CN Ast
ENSG00000007237	0	1.82032	0.281	0.003	0	CN Ast
ENSG00000152495	0	1.81525	0.342	0.012	0	CN Ast
ENSG00000166619	0	1.79288	0.21	0	0	CN Ast
ENSG00000181722	0	1.79222	0.418	0.045	0	CN Ast
ENSG00000178531	0	1.74852	0.233	0	0	CN Ast
ENSG00000065923	0	1.73872	0.256	0.002	0	CN Ast
ENSG00000170921	0	1.71759	0.328	0.015	0	CN Ast
ENSG00000171858	0	1.68595	0.203	0.002	0	CN Ast
ENSG00000156052	0	1.68442	0.251	0	0	CN Ast
ENSG00000177169	0	1.63368	0.219	0	0	CN Ast
ENSG00000175161	0	1.63074	0.256	0.006	0	CN Ast
ENSG00000148408	0	1.62717	0.24	0.003	0	CN Ast
ENSG00000182667	0	1.61606	0.371	0.026	0	CN Ast
ENSG00000188735	0	1.61072	0.204	0	0	CN Ast
ENSG00000115875	0	1.60893	0.363	0.024	0	CN Ast
ENSG00000184672	0	1.58175	0.237	0.007	0	CN Ast
ENSG00000102780	0	1.56291	0.538	0.075	0	CN Ast
ENSG00000115977	0	1.55783	0.279	0.012	0	CN Ast
ENSG00000172461	0	1.55411	0.237	0.003	0	CN Ast
ENSG00000114861	0	1.5529	0.477	0.07	0	CN Ast
ENSG00000178662	0	1.55282	0.245	0.008	0	CN Ast
ENSG00000157680	0	1.54646	0.244	0.006	0	CN Ast
ENSG00000185565	0	1.52312	0.245	0.012	0	CN Ast
ENSG00000140538	0	1.49735	0.517	0.071	0	CN Ast
ENSG00000077264	0	1.49403	0.223	0.006	0	CN Ast
ENSG00000099308	0	1.48896	0.191	0.004	0	CN Ast
ENSG00000148053	0	1.48683	0.181	0.003	0	CN Ast
ENSG00000173611	0	1.47294	0.239	0.007	0	CN Ast
ENSG00000197872	0	1.46899	0.224	0.01	0	CN Ast
ENSG00000156113	0	1.46376	0.248	0.012	0	CN Ast
ENSG00000242265	0	1.45975	0.185	0.004	0	CN Ast
ENSG00000111783	0	1.45219	0.21	0.008	0	CN Ast
ENSG00000176165	0	1.44513	0.187	0.002	0	CN Ast
ENSG00000169967	0	1.43603	0.199	0.003	0	CN Ast
ENSG00000133687	0	1.43168	0.186	0.001	0	CN Ast
ENSG00000107331	0	1.43108	0.18	0.002	0	CN Ast
ENSG00000204406	0	1.41277	0.193	0.003	0	CN Ast
ENSG00000203485	0	1.41246	0.174	0.001	0	CN Ast
ENSG00000186260	0	1.40642	0.203	0.006	0	CN Ast
ENSG00000119314	0	1.37848	0.184	0.003	0	CN Ast
ENSG00000240694	0	1.35474	0.156	0.002	0	CN Ast
ENSG00000123908	0	1.35401	0.164	0.001	0	CN Ast
ENSG00000176102	0	1.35085	0.217	0.009	0	CN Ast
ENSG00000158856	0	1.3456	0.154	0.001	0	CN Ast
ENSG00000143322	0	1.32062	0.172	0.003	0	CN Ast
ENSG00000163531	0	1.3098	0.169	0.001	0	CN Ast
ENSG00000146433	0	1.30448	0.176	0.003	0	CN Ast
ENSG00000067606	0	1.30244	0.145	0.001	0	CN Ast
ENSG00000151067	0	1.25949	0.149	0.001	0	CN Ast
ENSG00000071073	0	1.24955	0.148	0.001	0	CN Ast
ENSG00000145741	0	1.24779	0.142	0	0	CN Ast
ENSG00000152580	0	1.2389	0.144	0	0	CN Ast
ENSG00000157741	1.02993e-305	1.38253	0.218	0.01	1.0839e-301	CN Ast
ENSG00000144406	3.77238e-305	1.42364	0.349	0.036	3.97006e-301	CN Ast
ENSG00000111371	2.17259e-302	1.28002	0.17	0.004	2.28643e-298	CN Ast
ENSG00000148848	2.72823e-302	1.1276	0.134	0.001	2.87119e-298	CN Ast
ENSG00000128585	3.30095e-300	1.22041	0.158	0.003	3.47392e-296	CN Ast
ENSG00000119820	2.65494e-299	1.07495	0.128	0.001	2.79406e-295	CN Ast
ENSG00000107147	9.03712e-298	1.47404	0.261	0.018	9.51066e-294	CN Ast
ENSG00000122574	2.14699e-295	1.22009	0.159	0.004	2.2595e-291	CN Ast
ENSG00000197121	6.22492e-293	1.1841	0.145	0.002	6.55111e-289	CN Ast
ENSG00000116754	1.32917e-290	1.41672	0.493	0.082	1.39882e-286	CN Ast
ENSG00000143252	3.01746e-286	1.23235	0.161	0.004	3.17558e-282	CN Ast
ENSG00000167524	5.8156e-285	1.18598	0.125	0.001	6.12033e-281	CN Ast
ENSG00000104290	8.14553e-283	1.46641	0.335	0.036	8.57236e-279	CN Ast
ENSG00000107864	3.3814e-282	1.20167	0.122	0.001	3.55859e-278	CN Ast
ENSG00000173933	7.3256e-280	1.01623	0.114	0	7.70946e-276	CN Ast
ENSG00000162105	3.33386e-279	1.10918	0.12	0.001	3.50856e-275	CN Ast
ENSG00000124406	6.52553e-278	1.45346	0.309	0.031	6.86747e-274	CN Ast
ENSG00000142235	1.53483e-276	1.22823	0.117	0	1.61525e-272	CN Ast
ENSG00000166405	1.05564e-275	1.32267	0.234	0.016	1.11095e-271	CN Ast
ENSG00000250305	1.84007e-269	1.21851	0.155	0.004	1.93649e-265	CN Ast
ENSG00000127922	1.93715e-265	1.09055	0.109	0	2.03865e-261	CN Ast
ENSG00000183049	1.51211e-262	1.21223	0.145	0.004	1.59134e-258	CN Ast
ENSG00000163328	1.82495e-261	1.29851	0.385	0.053	1.92058e-257	CN Ast
ENSG00000177511	2.84987e-259	1.35808	0.293	0.03	2.99921e-255	CN Ast
ENSG00000184156	3.64398e-259	1.05195	0.114	0.001	3.83493e-255	CN Ast
ENSG00000143851	5.22604e-259	1.27027	0.174	0.007	5.49988e-255	CN Ast
ENSG00000139746	2.36371e-257	1.30015	0.408	0.061	2.48757e-253	CN Ast
ENSG00000155886	4.5965e-257	1.35485	0.271	0.025	4.83736e-253	CN Ast
ENSG00000145819	1.51434e-256	1.07078	0.117	0.001	1.59369e-252	CN Ast
ENSG00000126070	2.28613e-256	1.39069	0.27	0.025	2.40593e-252	CN Ast
ENSG00000089280	9.52985e-255	1.37041	0.385	0.055	1.00292e-250	CN Ast
ENSG00000078018	2.87783e-253	1.39713	0.4	0.059	3.02863e-249	CN Ast
ENSG00000160613	1.04008e-252	1.21702	0.212	0.014	1.09458e-248	CN Ast
ENSG00000089916	2.21529e-252	1.22587	0.207	0.013	2.33137e-248	CN Ast
ENSG00000102466	5.58776e-252	1.26057	0.206	0.013	5.88056e-248	CN Ast
ENSG00000133083	8.52525e-250	1.34423	0.316	0.037	8.97198e-246	CN Ast
ENSG00000110427	7.543e-248	1.08532	0.126	0.002	7.93826e-244	CN Ast
ENSG00000136238	6.93396e-247	1.07279	0.124	0.002	7.29729e-243	CN Ast
ENSG00000178568	1.05527e-245	1.02231	0.114	0.001	1.11056e-241	CN Ast
ENSG00000160551	5.87459e-244	1.28804	0.236	0.019	6.18242e-240	CN Ast
ENSG00000102910	9.3626e-244	1.36638	0.248	0.022	9.8532e-240	CN Ast
ENSG00000106261	1.52522e-240	1.08606	0.174	0.009	1.60514e-236	CN Ast
ENSG00000112379	1.5407e-239	1.13144	0.155	0.006	1.62144e-235	CN Ast
ENSG00000115306	3.52097e-239	1.32105	0.281	0.03	3.70547e-235	CN Ast
ENSG00000189337	6.18597e-239	1.13046	0.15	0.005	6.51011e-235	CN Ast
ENSG00000156642	2.09859e-236	1.45025	0.251	0.024	2.20856e-232	CN Ast
ENSG00000133114	1.95208e-233	1.16467	0.149	0.006	2.05437e-229	CN Ast
ENSG00000123612	5.2378e-228	1.11333	0.117	0.002	5.51226e-224	CN Ast
ENSG00000075043	3.57898e-226	1.22398	0.158	0.007	3.76652e-222	CN Ast
ENSG00000170153	5.65019e-226	1.1934	0.156	0.007	5.94626e-222	CN Ast
ENSG00000109158	6.52498e-226	1.27712	0.245	0.023	6.86689e-222	CN Ast
ENSG00000198216	5.34135e-223	1.13337	0.353	0.051	5.62124e-219	CN Ast
ENSG00000123360	9.08666e-223	1.18728	0.454	0.085	9.5628e-219	CN Ast
ENSG00000153933	4.99826e-220	1.0704	0.137	0.005	5.26017e-216	CN Ast
ENSG00000182831	2.87842e-218	1.08035	0.132	0.004	3.02925e-214	CN Ast
ENSG00000143376	7.2799e-216	1.2082	0.216	0.018	7.66137e-212	CN Ast
ENSG00000143924	1.84318e-215	1.12189	0.166	0.009	1.93977e-211	CN Ast
ENSG00000163596	5.3726e-215	1.10305	0.158	0.008	5.65412e-211	CN Ast
ENSG00000112309	7.4385e-212	1.17648	0.128	0.004	7.82828e-208	CN Ast
ENSG00000178104	1.78152e-211	1.19308	0.202	0.016	1.87487e-207	CN Ast
ENSG00000150471	3.63724e-209	1.06005	0.143	0.006	3.82783e-205	CN Ast
ENSG00000235194	7.24933e-207	0.959496	0.105	0.002	7.62919e-203	CN Ast
ENSG00000110721	3.49115e-206	0.961981	0.104	0.002	3.67409e-202	CN Ast
ENSG00000196233	1.77068e-204	1.13061	0.162	0.009	1.86346e-200	CN Ast
ENSG00000232112	7.18242e-203	1.36761	0.27	0.034	7.55878e-199	CN Ast
ENSG00000108256	7.52925e-203	1.09611	0.136	0.006	7.92378e-199	CN Ast
ENSG00000106771	2.8198e-202	1.10649	0.142	0.007	2.96756e-198	CN Ast
ENSG00000010244	4.552e-202	1.22679	0.285	0.037	4.79052e-198	CN Ast
ENSG00000049618	1.60373e-201	1.17838	0.405	0.076	1.68777e-197	CN Ast
ENSG00000008086	1.34166e-200	1.11083	0.164	0.01	1.41197e-196	CN Ast
ENSG00000039523	2.77712e-200	1.01232	0.126	0.004	2.92264e-196	CN Ast
ENSG00000153944	3.83685e-200	1.23842	0.147	0.007	4.0379e-196	CN Ast
ENSG00000138411	7.01881e-197	1.05341	0.133	0.006	7.38659e-193	CN Ast
ENSG00000145016	2.41046e-196	0.897454	0.102	0.002	2.53677e-192	CN Ast
ENSG00000170500	2.73841e-196	1.09554	0.367	0.062	2.8819e-192	CN Ast
ENSG00000134852	3.42237e-194	1.04974	0.117	0.004	3.6017e-190	CN Ast
ENSG00000003402	1.31991e-193	0.931614	0.104	0.002	1.38908e-189	CN Ast
ENSG00000105810	6.47657e-193	1.02479	0.224	0.023	6.81595e-189	CN Ast
ENSG00000175387	8.11095e-193	0.956453	0.111	0.003	8.53597e-189	CN Ast
ENSG00000175893	6.35361e-191	0.97329	0.103	0.002	6.68654e-187	CN Ast
ENSG00000151150	2.58031e-190	1.18617	0.335	0.055	2.71552e-186	CN Ast
ENSG00000186862	8.49397e-190	1.07423	0.14	0.007	8.93906e-186	CN Ast
ENSG00000077279	1.76394e-189	0.999829	0.124	0.005	1.85637e-185	CN Ast
ENSG00000107281	5.10569e-189	1.24199	0.309	0.047	5.37323e-185	CN Ast
ENSG00000133401	2.23846e-188	1.08527	0.165	0.011	2.35576e-184	CN Ast
ENSG00000139970	2.93448e-185	1.26494	0.231	0.027	3.08824e-181	CN Ast
ENSG00000065135	5.90853e-184	0.997795	0.132	0.006	6.21814e-180	CN Ast
ENSG00000124788	5.18958e-183	1.01724	0.24	0.028	5.46152e-179	CN Ast
ENSG00000197119	1.7152e-180	1.20094	0.219	0.024	1.80508e-176	CN Ast
ENSG00000107863	2.09237e-180	1.15864	0.192	0.018	2.20201e-176	CN Ast
ENSG00000183778	7.86822e-180	0.953349	0.11	0.004	8.28052e-176	CN Ast
ENSG00000119866	7.17108e-179	1.10339	0.238	0.029	7.54684e-175	CN Ast
ENSG00000198039	5.70306e-177	0.936267	0.102	0.003	6.0019e-173	CN Ast
ENSG00000165300	6.70108e-177	1.08158	0.239	0.029	7.05221e-173	CN Ast
ENSG00000082153	6.35424e-176	1.00214	0.124	0.006	6.6872e-172	CN Ast
ENSG00000116984	9.1696e-176	0.989548	0.126	0.006	9.65009e-172	CN Ast
ENSG00000153707	1.48209e-175	1.04758	0.14	0.008	1.55975e-171	CN Ast
ENSG00000188227	2.23232e-175	0.962979	0.11	0.004	2.3493e-171	CN Ast
ENSG00000075391	2.54072e-175	1.19577	0.273	0.04	2.67386e-171	CN Ast
ENSG00000132300	3.99506e-175	1.08316	0.163	0.012	4.2044e-171	CN Ast
ENSG00000213639	1.16626e-171	1.18255	0.186	0.018	1.22737e-167	CN Ast
[truncated: 1,349 more rows]
