# Supplementary material for: Single-cell-resolution transcriptome map of human, chimpanzee, bonobo, and macaque brains
Source: HighWire-hosted journal article supplement (doi:10.1101/gr.256958.119), 2020-05-01
Supplement: Supplemental_Table_S7.xlsx [file Supplemental_Table_S7.xlsx]

## Sheet: Primary antibodies
Table S7. Antibodies used for immunohistochemistry analysis.
Primary antibodies used in the immunohistochemistry experiments.
antibody	catalogue number	host	reactivity (supplier and BenchSci info)	applications	dilution
NFAT5	Novus Biologicals NB120-3446	rabbit	human, mouse, rat, hamster, rabbit	WB, ChIP, GS, ICC/IF, IHC, IHC-P, IP, ICC/IF	1:250
Musashi-2	Novus Biologicals NBP2-45837	mouse	human, monkey, rat, mouse, dog	WB, IHC, ICC/IF	1:500
GFAP	ThermoFisher Scientific PA5-18598	goat	human, mouse, rat, sheep, horse, cynomolgus monkey, cow, guinea pig, chimpanzee, pig, dog, chicken, zebrafish	ELISA, IHC(P), pep-ELISA, WB	1:1000
NeuN	Millipore MAB377	mouse	avian, chicken, ferret, human, mouse, pig, primate, rat, salamander, goat	WB, IC, IH(P)	1:250
NeuN	Cell Signaling #24307	rabbit	human, mouse, rat, rabbit	WB, IP, IHC, IF, F, CHIP	1:250

## Sheet: Secondary antibodies
Secondary antibodies and dyes used in the immunohistochemistry experiments.
antibody / dye	supplier	host	conjugate	dilution
anti-rabbit	Invitrogen	donkey	Alexa Fluor 488	1:500
	A-21206
anti-mouse	Invitrogen	donkey	Alexa Fluor 488	1:500
	A-21202
anti-goat	Invitrogen	donkey	Alexa Fluor 488	1:500
	A-11055
anti-rabbit	Vector Labs	horse	biotinylated	1:500
	BA-1100
anti-mouse	Vector Labs	horse	biotinylated	1:500
	BA-2000
streptavidin	Invitrogen		Alexa Fluor 568	1:500
	S-11226
DAPI	Thermo Scientific			0.5 µg/ml
	62247
