# Supplementary material for: Single-cell-resolution transcriptome map of human, chimpanzee, bonobo, and macaque brains
Source: HighWire-hosted journal article supplement (doi:10.1101/gr.256958.119), 2020-05-01
Supplement: Supplemental_Table_S8.xlsx [file Supplemental_Table_S8.xlsx]

## Sheet: bulk RNA-seq
Table S8. Sample coverage and mapping statistics.
Sample	Total	Concordantly Uniq	Disconcordantly Uniq	Single Uniq	Concordantly Mult	Single Mult	Alignment Rate	Region
BA28	19146897	16252188	214001	829787	613038	96915	91.62	1 Supramarginal (BA40)
BB28	18386822	15349958	174532	1090451	429844	106704	90.03	1 Supramarginal (BA40)
BC28	16893863	12807455	267442	1319126	822350	215578	86.8	1 Supramarginal (BA40)
CHB28	17022380	14459184	165205	507832	1211455	99968	94.81	1 Supramarginal (BA40)
CHC28	24481980	20800509	254449	845792	1714411	172408	95.08	1 Supramarginal (BA40)
CHD28	17169523	14261446	172831	678817	1194063	115745	93.34	1 Supramarginal (BA40)
HA58	16488908	14768294	155626	564003	570947	66709	95.88	1 Supramarginal (BA40)
HB58	15697918	13455437	158703	895278	478934	180527	93.2	1 Supramarginal (BA40)
HC58	16476822	14376059	174273	685387	627455	177538	94.73	1 Supramarginal (BA40)
HD58	20000862	18021193	187139	726197	557092	102998	95.9	1 Supramarginal (BA40)
MA28	11864384	9496919	143135	812638	357871	139596	88.28	1 Supramarginal (BA40)
MB28	16620073	12771723	171208	1127797	437362	186681	84.46	1 Supramarginal (BA40)
MC28	12553899	9808895	155581	946503	419483	170434	87.16	1 Supramarginal (BA40)
BA10	18443282	15544848	211377	842638	531584	86652	90.83	10 2ary Visual (BA18/19)
BB10	16172688	13158309	161826	1108409	358939	87079	88.28	10 2ary Visual (BA18/19)
BC10	20188000	14891290	347576	1696085	1077722	268423	85.69	10 2ary Visual (BA18/19)
CHB10	14397784	12094342	137187	390943	1165364	92825	94.73	10 2ary Visual (BA18/19)
CHC10	13815340	11684458	126571	391081	1022210	93464	94.64	10 2ary Visual (BA18/19)
CHD10	18025994	15150550	169897	469435	1419112	94376	94.43	10 2ary Visual (BA18/19)
HA67	16408199	14692363	148591	539655	618523	77028	96.1	10 2ary Visual (BA18/19)
HB67	19868869	17383249	199473	947953	610592	194564	94.44	10 2ary Visual (BA18/19)
HC67	15800252	13534675	170595	912087	433155	165872	92.89	10 2ary Visual (BA18/19)
HD67	13820631	12319082	135151	557385	362511	79835	95.04	10 2ary Visual (BA18/19)
MB10	17936635	14287102	174300	1106368	441066	170175	86.64	10 2ary Visual (BA18/19)
MC10	16208148	13124412	196852	1107255	481077	180192	89.13	10 2ary Visual (BA18/19)
BA5	15934916	13278048	183877	906327	510921	97915	90.84	11 Cingulate Anterior (BA24)
BB5	15649719	12833537	160139	961456	411480	93187	89.03	11 Cingulate Anterior (BA24)
BC5	18418914	14383962	304649	1284081	939998	259608	89.04	11 Cingulate Anterior (BA24)
CHB5	20624327	17530732	197895	567917	1519836	122571	95	11 Cingulate Anterior (BA24)
CHC5	14676193	12471679	137992	346872	1138026	96437	95.18	11 Cingulate Anterior (BA24)
CHD5	19138352	16218446	185302	489513	1470765	102828	94.94	11 Cingulate Anterior (BA24)
HA21	16383736	14810188	162288	515271	533251	76798	96.45	11 Cingulate Anterior (BA24)
HB21	12369737	10795314	126315	552891	421681	116998	94.41	11 Cingulate Anterior (BA24)
HC21	16368074	14287926	159450	861037	468839	182781	94.32	11 Cingulate Anterior (BA24)
HD21	18824630	16186120	191595	1133020	538035	243611	93.52	11 Cingulate Anterior (BA24)
MA5	18896897	15293386	199243	1166027	613910	209740	88.87	11 Cingulate Anterior (BA24)
MB5	17427903	13399732	153622	1197733	435624	173565	84.2	11 Cingulate Anterior (BA24)
MC5	20923181	16787760	272520	1410386	681397	255948	88.78	11 Cingulate Anterior (BA24)
BA4	17524304	14772127	205951	946924	513722	101674	91.39	12 Cingulate Anterior (BA32)
BB4	17523604	13925038	167117	1320678	334998	88405	86.35	12 Cingulate Anterior (BA32)
BC4	17194071	11885267	171000	800742	1023025	164470	78.88	12 Cingulate Anterior (BA32)
CHB4	19371787	16484825	195656	514366	1507163	109248	95.5	12 Cingulate Anterior (BA32)
CHC4	17098855	14207080	164843	636907	1265865	146730	93.75	12 Cingulate Anterior (BA32)
CHD4	14906911	12632935	141867	406687	1113813	78985	94.8	12 Cingulate Anterior (BA32)
HA12	18638116	16796765	174386	663992	534707	118771	96.02	12 Cingulate Anterior (BA32)
HB12	14916914	13146164	149455	649998	467151	111649	94.82	12 Cingulate Anterior (BA32)
HC12	15097789	12949116	148217	747709	622121	210471	94.04	12 Cingulate Anterior (BA32)
HD12	17940897	16059497	165903	652790	598702	90298	95.85	12 Cingulate Anterior (BA32)
MA4	17494626	14416833	202303	1035958	500557	180536	89.9	12 Cingulate Anterior (BA32)
MB4	20550946	15766167	203817	1462825	531261	259158	84.48	12 Cingulate Anterior (BA32)
MC4	17303530	13867641	224534	1198190	556716	209113	88.72	12 Cingulate Anterior (BA32)
BA1	18872395	15829745	221918	1090392	564079	119783	91.25	13 Prefrontal (BA10)
BB1	19623749	14834725	203299	2032454	300947	139055	83.7	13 Prefrontal (BA10)
BC1	14818652	11722142	225318	861018	778098	165778	89.34	13 Prefrontal (BA10)
CHB1	17226487	14762805	166025	399075	1295195	82193	95.58	13 Prefrontal (BA10)
CHC1	13177650	11090774	126280	435561	976432	92141	94.53	13 Prefrontal (BA10)
CHD1	13632327	11499726	132041	374566	1037389	76806	94.59	13 Prefrontal (BA10)
HA74	15129052	13006959	151096	607203	889676	66369	95.08	13 Prefrontal (BA10)
HB74	16664708	14784978	157490	727965	471910	112854	95.02	13 Prefrontal (BA10)
HC74	16314377	14322711	170203	763912	504787	120670	94.64	13 Prefrontal (BA10)
HD74	17750657	15938697	165277	608521	562606	87640	95.85	13 Prefrontal (BA10)
MA1	15277312	12128942	190815	1225779	433011	206528	88.16	13 Prefrontal (BA10)
MB1	16158734	12542819	146449	1034134	440945	159669	84.95	13 Prefrontal (BA10)
MC1	13078955	10574459	165178	835197	421080	148540	89.09	13 Prefrontal (BA10)
BA14	14438510	11941780	173407	710623	547131	87736	90.46	14 Inferior Temporal (BA20)
BB14	13609172	11276155	130474	731728	318857	56961	89.06	14 Inferior Temporal (BA20)
BC14	19180380	14366080	367073	1316790	1417164	289397	88.39	14 Inferior Temporal (BA20)
CHB14	21049916	17575364	225572	695422	1712990	172660	94.77	14 Inferior Temporal (BA20)
CHC14	17113407	14301739	169957	537726	1389131	136509	94.65	14 Inferior Temporal (BA20)
CHD14	20344536	17087582	191633	565355	1572993	112548	94.33	14 Inferior Temporal (BA20)
HA37	16860552	15015964	160419	720170	502877	93257	95.41	14 Inferior Temporal (BA20)
HB37	16116895	14269281	157292	726966	454467	118479	94.95	14 Inferior Temporal (BA20)
HC37	19102906	16638747	202852	1057975	602999	199825	94.61	14 Inferior Temporal (BA20)
HD37	14926683	13454312	132705	514029	436683	97878	96	14 Inferior Temporal (BA20)
MA12	17395168	14234434	215306	1259873	460984	210561	89.94	14 Inferior Temporal (BA20)
MB12	13436011	10567278	130409	840555	347926	144617	85.88	14 Inferior Temporal (BA20)
MC12	27482997	21744464	330134	2032855	902739	335230	87.91	14 Inferior Temporal (BA20)
BA32	19505468	16328242	229198	1007726	632105	110374	90.99	15 Insular Posterior Cortex
BB32	19422877	16123535	188851	977711	493926	112439	89.33	15 Insular Posterior Cortex
BC32	18420245	14086364	268849	1182723	1070867	194119	87.48	15 Insular Posterior Cortex
CHB32	14544402	12286266	147245	428806	1125751	108502	95.07	15 Insular Posterior Cortex
CHC32	19410276	16308611	189921	635376	1466842	159893	94.6	15 Insular Posterior Cortex
CHD32	20673804	17647059	190075	530604	1566905	102281	95.39	15 Insular Posterior Cortex
HA42	14579964	13139466	134985	486289	436326	72442	95.95	15 Insular Posterior Cortex
HB42	15675783	13827253	159260	689760	482014	121655	94.89	15 Insular Posterior Cortex
HC42	14723141	12922344	145829	608450	600040	125944	95.33	15 Insular Posterior Cortex
HD42	15095898	13172093	143199	579774	467786	90621	93.52	15 Insular Posterior Cortex
MA32	21654096	17348166	272359	1570788	634473	275114	88.56	15 Insular Posterior Cortex
MB32	15684530	12247358	135423	903284	458692	140418	85.2	15 Insular Posterior Cortex
MC32	18132358	14343288	238779	1292864	625568	249064	88.12	15 Insular Posterior Cortex
BA2	19503507	16480734	216144	843019	576151	80616	90.93	16 Dorsolateral Prefrontal (BA9)
BB2	14046623	11248584	145310	921557	392655	82032	87.48	16 Dorsolateral Prefrontal (BA9)
BC2	19216005	15085662	247637	1025035	1127114	159203	88.74	16 Dorsolateral Prefrontal (BA9)
CHB2	16635563	14145496	155407	408802	1332069	85207	95.46	16 Dorsolateral Prefrontal (BA9)
CHC2	15243691	12869238	159869	505295	1156283	120970	95.11	16 Dorsolateral Prefrontal (BA9)
CHD2	20122480	16900909	190871	677949	1472352	119982	94.24	16 Dorsolateral Prefrontal (BA9)
HA3	15244177	13721174	138087	567396	438893	84543	95.93	16 Dorsolateral Prefrontal (BA9)
HB3	16266714	14273867	154064	643112	662143	123555	95.12	16 Dorsolateral Prefrontal (BA9)
HC3	18948432	16388250	203143	1118995	533221	167797	93.77	16 Dorsolateral Prefrontal (BA9)
HD3	16335978	14587506	167582	645172	498610	91024	95.63	16 Dorsolateral Prefrontal (BA9)
MA2	15150354	12056476	185959	1119657	461967	207694	88.24	16 Dorsolateral Prefrontal (BA9)
MB2	16132006	12666255	149090	820095	439260	130072	85.11	16 Dorsolateral Prefrontal (BA9)
MC2	18740232	14692256	231685	1401747	659751	274937	87.63	16 Dorsolateral Prefrontal (BA9)
BA3	16724443	14074357	194193	869330	486229	88511	91.09	17 Orbitofrontal (BA11)
BB3	15842675	12827746	154719	1103807	361020	97949	88.02	17 Orbitofrontal (BA11)
BC3	17044904	13245997	301426	1088656	1113142	242830	89.92	17 Orbitofrontal (BA11)
CHB3	21879259	18551065	234273	611966	1729364	145651	95.49	17 Orbitofrontal (BA11)
CHC3	17531323	14733597	165711	532729	1394949	128080	94.83	17 Orbitofrontal (BA11)
CHD3	18249330	15384111	168713	493633	1392394	93434	94.46	17 Orbitofrontal (BA11)
HA7	17564964	15855246	162271	585292	487874	86090	95.88	17 Orbitofrontal (BA11)
HB7	17924894	15949494	182152	695901	527005	97820	95.15	17 Orbitofrontal (BA11)
HC7	16288683	14261499	172630	783361	487540	123991	94.39	17 Orbitofrontal (BA11)
HD7	17001518	15196506	176934	616956	502757	113256	95.53	17 Orbitofrontal (BA11)
MA3	15440758	12609730	178540	949212	462526	168705	89.44	17 Orbitofrontal (BA11)
MB3	12035098	9394428	105521	730353	310825	104097	84.98	17 Orbitofrontal (BA11)
MC3	13257942	10487270	167754	883898	484949	174858	88.02	17 Orbitofrontal (BA11)
BA11	17275222	14317771	199175	954910	545346	93674	90.23	18 Ventrolateral Prefrontal (BA44)
BB11	17676360	14421945	166863	1044765	451218	111980	88.36	18 Ventrolateral Prefrontal (BA44)
BC11	16918755	13134153	231882	943851	1114591	185840	88.93	18 Ventrolateral Prefrontal (BA44)
CHB11	19716054	16763880	206349	562568	1496488	120840	95.4	18 Ventrolateral Prefrontal (BA44)
CHC11	23490728	19905053	216141	616407	1807342	140550	94.96	18 Ventrolateral Prefrontal (BA44)
CHD11	13512072	11303013	130727	404562	1016511	81926	93.94	18 Ventrolateral Prefrontal (BA44)
HA11	15100675	13522290	145743	530580	561356	77231	96.24	18 Ventrolateral Prefrontal (BA44)
HB11	18762145	16566076	182071	849693	547450	143447	94.83	18 Ventrolateral Prefrontal (BA44)
HC11	17011706	14870779	162025	817886	537197	175803	94.45	18 Ventrolateral Prefrontal (BA44)
HD11	17397966	15539991	167641	643489	582028	105160	95.78	18 Ventrolateral Prefrontal (BA44)
MA14	13489047	10418898	167814	1265387	389141	201941	86.81	18 Ventrolateral Prefrontal (BA44)
MB14	18884230	14510556	183713	1178816	503502	217373	84.18	18 Ventrolateral Prefrontal (BA44)
MC14	16539178	13110353	215842	1224756	540660	216695	88.2	18 Ventrolateral Prefrontal (BA44)
BA42	18636539	15340403	218020	1010508	643364	137401	90.02	19 Amygdala
BB42	18415144	15267733	173877	897593	471578	147998	89.25	19 Amygdala
BC42	13761938	10001263	230232	837433	1245349	211600	87.21	19 Amygdala
CHB42	20535975	17041929	201906	800198	1561283	182166	93.96	19 Amygdala
CHC42	17436268	14581629	178011	539584	1431409	204133	94.99	19 Amygdala
CHD42	15892889	13400417	150832	447544	1311079	116116	95.29	19 Amygdala
HA33	19767169	16572183	180546	681830	1719384	179512	95.63	19 Amygdala
HB33	13192933	11625479	133427	611689	358407	100787	94.55	19 Amygdala
HC33	16538917	14462711	163314	753747	524084	214700	94.53	19 Amygdala
HD33	20972800	18832093	190400	825245	592476	156533	95.87	19 Amygdala
MA42	21489445	16999744	248340	1745164	657283	336329	88.16	19 Amygdala
MB42	20009364	15185309	186061	1244520	564825	270744	83.43	19 Amygdala
MC42	21853045	17032418	249486	1278110	930484	289052	86.93	19 Amygdala
BA12	46719706	38811686	517963	2366131	1440681	259343	90.08	2 2ary Auditory (BA22)
BB12	16297635	13446867	166212	959810	395618	84812	89.16	2 2ary Auditory (BA22)
BC12	15731521	11817026	241163	1402202	678985	215165	86.11	2 2ary Auditory (BA22)
CHB12	15922768	13431257	160067	427524	1253079	94594	94.87	2 2ary Auditory (BA22)
CHC12	25524166	21534808	250419	829850	1878843	167666	94.67	2 2ary Auditory (BA22)
CHD12	20808602	17539608	194807	559263	1565050	104726	94.34	2 2ary Auditory (BA22)
HA52	16058586	14501365	146440	548752	470878	65327	96.06	2 2ary Auditory (BA22)
HB52	20432782	17819130	210831	884272	740363	161170	94.42	2 2ary Auditory (BA22)
HC52	18672392	16092906	200742	979571	561112	228900	93.5	2 2ary Auditory (BA22)
HD52	15630702	13994891	158319	619441	444249	106167	95.71	2 2ary Auditory (BA22)
MA15	14122833	11429449	166314	1070673	381563	172350	89.21	2 2ary Auditory (BA22)
MB15	16119481	12535430	157331	1013080	425387	160994	85.02	2 2ary Auditory (BA22)
MC15	15374537	12265484	196417	1092837	472192	180379	88.27	2 2ary Auditory (BA22)
BA36	16859320	14182110	197853	763187	626574	118078	91.62	20 Entorhinal Cortex
BB36	17609467	14895538	173415	768656	467404	158343	90.86	20 Entorhinal Cortex
BC36	20421528	14812518	327117	1138071	1931205	276626	87.06	20 Entorhinal Cortex
CHB36	19629255	16393544	203065	647212	1558292	187817	94.62	20 Entorhinal Cortex
CHC36	17050259	14213755	172563	556293	1371479	150076	94.49	20 Entorhinal Cortex
CHD36	19369479	16458911	183112	602740	1404853	118504	95.03	20 Entorhinal Cortex
HA34	16895153	15171097	152263	521446	591525	121184	96.1	20 Entorhinal Cortex
HB34	19150817	16967761	184394	772596	566350	146138	94.92	20 Entorhinal Cortex
HC34	11782675	10001206	121735	687819	467688	115097	93.29	20 Entorhinal Cortex
HD34	19047614	17266493	160816	449609	595967	90375	96.04	20 Entorhinal Cortex
MA36	14755874	11620353	171854	1139333	465570	200181	87.61	20 Entorhinal Cortex
MB36	13071794	10181561	109209	727014	382896	115894	84.88	20 Entorhinal Cortex
MC36	16782002	13406922	177919	851304	687573	168788	88.09	20 Entorhinal Cortex
BA33	19279436	16120441	224777	882836	726944	122403	91.16	21 Hippocampus
BB33	15733606	12982992	169209	1031567	391615	97014	89.67	21 Hippocampus
BC33	17555221	12912367	246588	951899	1325837	207223	85.81	21 Hippocampus
CHB34	16594032	13910979	167978	507242	1337235	145661	94.87	21 Hippocampus
CHC34	17035093	14242919	167607	516656	1362608	212243	94.73	21 Hippocampus
CHD34	16452884	13853807	159767	656974	1105165	123557	94.26	21 Hippocampus
HA50	18108331	16061728	170974	818026	500616	150772	95.08	21 Hippocampus
HB50	13748460	11717451	149423	821621	480499	173195	93.43	21 Hippocampus
HC50	14452334	12641167	143707	595698	490082	147864	94.43	21 Hippocampus
HD50	13865959	12409779	142424	528294	419853	72373	95.72	21 Hippocampus
MA34	18835733	14928021	239902	1369125	582755	286681	88.02	21 Hippocampus
MB34	16581700	12969855	156433	867314	480231	157560	85.15	21 Hippocampus
MC34	20619600	16616756	209384	891152	904388	211844	88.66	21 Hippocampus
BA18	20902861	16720293	240211	1556486	621313	165836	88.23	22 Hypothalamus
BB18	15094445	10156708	121614	839955	341898	134083	73.58	22 Hypothalamus
BC18	18754473	14584407	275235	858965	1422897	197908	89.64	22 Hypothalamus
CHB18	16912423	14180208	173096	523645	1330798	157499	94.75	22 Hypothalamus
CHC18	19576763	16226212	191623	723285	1562069	282083	94.41	22 Hypothalamus
CHD18	17171369	14621280	149357	450659	1309288	101122	95.25	22 Hypothalamus
HA32	79137587	68338597	634414	2865211	2568774	750879	92.69	22 Hypothalamus
HB32	68914993	57754687	605789	2857247	3526925	634055	92.34	22 Hypothalamus
HC32	59997941	52129728	496561	2423988	1859639	396318	93.16	22 Hypothalamus
HD32	59985100	51302642	533103	2759794	1967494	544515	92.45	22 Hypothalamus
MA18	17417243	13742349	196962	1266813	575564	273929	87.76	22 Hypothalamus
MB18	13404525	10466342	133565	875962	371395	157797	85.7	22 Hypothalamus
MC18	15048361	11824535	162593	798515	647039	201417	87.28	22 Hypothalamus
BA17	16341802	13401960	190150	953597	506097	104252	89.51	23 Thalamus
BB17	19485690	16083411	196496	1227452	433811	117316	89.22	23 Thalamus
BC17	15277074	11910343	215706	725394	1108308	149624	89.49	23 Thalamus
CHB17	18490621	15359870	193502	634949	1524450	149936	94.48	23 Thalamus
CHC17	13411874	11209291	139013	491763	1066903	125092	94.87	23 Thalamus
CHD17	18544305	15693552	177130	495272	1534660	105002	95.48	23 Thalamus
HA44	21164720	19027381	200591	814287	588149	127335	95.85	23 Thalamus
HB44	12750750	11022113	132771	535445	574547	117781	94.55	23 Thalamus
HC44	14488031	12793871	140224	627263	476165	103781	95.08	23 Thalamus
HD44	15675462	14072448	150897	564925	485240	73975	95.87	23 Thalamus
MA17	16271934	12703426	207398	1255983	507762	260258	87.12	23 Thalamus
MB17	19714630	14760477	185812	1170258	584869	218369	82.3	23 Thalamus
MC17A	19228481	13540360	189119	1171153	791456	205223	79.1	23 Thalamus
BA15	23932395	19765081	276138	1332169	868831	181020	90.53	24 Corpus Callosum Anterior
BB15	15949245	12483522	153983	1158045	389068	128692	85.71	24 Corpus Callosum Anterior
BC15	17664448	13685297	192168	1185372	627559	126693	85.83	24 Corpus Callosum Anterior
CHB15	15133900	12167037	150635	740575	1047039	236137	91.54	24 Corpus Callosum Anterior
CHC15	22906831	19332599	224671	839154	1505194	223416	94.27	24 Corpus Callosum Anterior
CHD15	17872148	15330248	161602	524107	1167120	92015	94.94	24 Corpus Callosum Anterior
HA16	15372204	13616686	147489	664746	442521	157160	95.09	24 Corpus Callosum Anterior
HB16	15637351	13432688	149679	1014018	424397	171230	93.36	24 Corpus Callosum Anterior
HC16	18345902	15864224	165728	643488	1139010	91696	95.59	24 Corpus Callosum Anterior
HD16	16202752	14180374	154682	750310	479612	125714	94.14	24 Corpus Callosum Anterior
MA16A	18387411	14707821	229261	1483984	558915	282420	89.08	24 Corpus Callosum Anterior
MB16A	15919477	12209935	135410	1061717	459499	190748	84.37	24 Corpus Callosum Anterior
MC16A	17337415	13602031	188611	1012390	706425	194393	87.1	24 Corpus Callosum Anterior
BA16	13516515	9975056	135996	1209422	292486	96217	81.8	25 Corpus Callosum Posterior
BB16	21085670	14798493	214199	2049468	473345	204275	78.79	25 Corpus Callosum Posterior
BC16	16974026	13170341	163923	997316	492339	101511	84.69	25 Corpus Callosum Posterior
CHB16	18684655	14899752	188187	923631	1413838	308628	91.61	25 Corpus Callosum Posterior
CHC16	14220225	11643490	145089	668218	927756	154315	92.32	25 Corpus Callosum Posterior
CHD16	16251465	13785660	140544	503701	1098280	100463	94.31	25 Corpus Callosum Posterior
HA56	16929449	15044151	157751	700582	454833	124138	94.92	25 Corpus Callosum Posterior
HB56	20615428	17082317	221032	1218219	874923	299266	91.86	25 Corpus Callosum Posterior
HC56	16341458	14381056	149907	717885	458428	157722	94.41	25 Corpus Callosum Posterior
HD56	15651827	13524161	157986	837682	442675	184827	93.51	25 Corpus Callosum Posterior
MA16B	14543565	11412949	180420	1265480	441290	284730	88.08	25 Corpus Callosum Posterior
MB16B	19458404	15096636	198070	1363312	572739	225541	85.63	25 Corpus Callosum Posterior
MC16B	15200114	12069072	158469	826950	629111	159922	87.83	25 Corpus Callosum Posterior
BA39	18238192	14631857	189288	1102951	551755	151966	87.73	26 Internal Capsule
BB39	17219740	13835515	164482	984982	575590	177004	88.02	26 Internal Capsule
BC39	20890102	16605805	253495	1120147	1020547	178683	88.7	26 Internal Capsule
CHB39	18081445	14176755	167325	673980	1307930	181247	88.93	26 Internal Capsule
CHC39	15454855	12482169	159161	842269	1061107	343942	92.5	26 Internal Capsule
CHD39	18018950	15059370	165027	706973	1263842	137318	93.85	26 Internal Capsule
HA25	17478411	15213861	189722	808710	518113	156295	93.85	26 Internal Capsule
HB25	19806185	17093709	205080	988438	645012	275768	93.79	26 Internal Capsule
HC25	17359706	14890904	164084	896471	597147	213227	93.36	26 Internal Capsule
HD25	17113914	14478096	167555	1365761	439978	250092	92.87	26 Internal Capsule
MA39	12453162	9658599	165451	1173685	359331	221505	87.38	26 Internal Capsule
MB39	15040775	11490374	142491	912728	474609	200017	84.2	26 Internal Capsule
MC39	17771783	13736618	194895	1099181	762747	234045	86.43	26 Internal Capsule
BA40	17651795	14434652	198890	943846	598769	136914	89.35	27 Globus Pallidus
BB40	16888711	13756910	160985	941475	447604	118552	88.2	27 Globus Pallidus
BC40	24220814	17241899	308439	986485	2361047	256912	84.77	27 Globus Pallidus
CHD40	16944909	14245294	162303	522657	1410679	118703	95.24	27 Globus Pallidus
HA30	19304619	17158352	183352	788899	557476	174150	95.21	27 Globus Pallidus
HB30	15905066	14046276	153781	620265	566219	120399	95.17	27 Globus Pallidus
HC30	14805186	12864632	140490	738494	439761	140782	93.78	27 Globus Pallidus
HD30	16471012	14665985	157415	636255	521459	96702	95.39	27 Globus Pallidus
MC40	16363933	12437652	180804	954239	783331	204420	85.44	27 Globus Pallidus
BA20	17856390	14462008	197305	1141079	590016	142584	88.99	28 Cerebellar White Matter
BB20	14265483	10403680	145857	1558790	360272	232700	82.76	28 Cerebellar White Matter
BC20	16054924	12291726	195603	954219	982881	230024	87.59	28 Cerebellar White Matter
CHB20	19033199	15872245	194237	637773	1477757	168748	94.3	28 Cerebellar White Matter
CHC20	17149380	14372634	171799	579735	1262358	149029	94.3	28 Cerebellar White Matter
CHD20	15852677	13353757	137598	529936	1162331	106608	94.44	28 Cerebellar White Matter
HA71	13712209	12137609	128357	548455	420424	125134	94.98	28 Cerebellar White Matter
HB71	15730185	13512622	150344	794639	554828	291624	93.84	28 Cerebellar White Matter
HC71	20184519	17168709	180839	1002995	688928	515127	93.13	28 Cerebellar White Matter
HD71	20032685	16645789	211742	1244895	731976	466390	92.08	28 Cerebellar White Matter
MA20	15035823	11950422	180331	1049052	484997	185212	88.01	28 Cerebellar White Matter
MB20	14551712	11145157	140651	1221150	339560	170770	84.67	28 Cerebellar White Matter
MC20	14843033	11562439	163389	864249	587632	172716	86.45	28 Cerebellar White Matter
BA43	18577515	15490532	237152	1051839	668623	149696	91.49	29 Substantia Nigra
BC43	13045627	9421997	180458	861348	1047323	147697	85.5	29 Substantia Nigra
CHB43	17969321	15173598	189533	575497	1311232	144089	94.8	29 Substantia Nigra
CHC43	15434360	12888992	158742	596855	1121099	184014	94.33	29 Substantia Nigra
HA46	14275273	12526149	137426	681927	435336	147735	94.67	29 Substantia Nigra
HB46	19031925	16497198	185828	855268	724324	182047	94.19	29 Substantia Nigra
HC46	13889734	12339104	129185	649847	359375	107370	95.08	29 Substantia Nigra
HD46	20013650	17709746	206606	807757	698107	174582	95.46	29 Substantia Nigra
MA43	20836581	15223576	264490	1582290	951096	508842	83.91	29 Substantia Nigra
MB43	19968194	14419631	176914	1545545	589478	358091	80.82	29 Substantia Nigra
MC43	16141602	11710541	206729	982695	871664	247927	83.04	29 Substantia Nigra
BA7	17992912	15140169	205919	879658	511777	99815	90.86	3 Precuneus (BA7)
BB7	21255527	16894466	207643	1704642	435868	122759	86.81	3 Precuneus (BA7)
BC7	16727352	11948215	280395	1082520	1452380	237303	85.73	3 Precuneus (BA7)
CHB7	19384700	16475359	182134	466957	1513878	98452	95.2	3 Precuneus (BA7)
CHC7	17463650	14666422	178285	660560	1254360	136791	94.47	3 Precuneus (BA7)
CHD7	17181336	14672303	153902	431997	1356579	86374	95.7	3 Precuneus (BA7)
HA62	20085942	17979469	207461	777759	568802	103389	95.57	3 Precuneus (BA7)
HB62	16121316	14087386	178347	779929	543921	110459	94.63	3 Precuneus (BA7)
HC62	18575953	16149847	195746	917244	552465	220682	94.03	3 Precuneus (BA7)
HD62	18310893	16316213	172943	755024	529727	100095	95.28	3 Precuneus (BA7)
MA8	15486637	12578455	185659	1029612	447731	171876	89.19	3 Precuneus (BA7)
MB8	20095918	15839817	186259	1259368	488267	190157	85.78	3 Precuneus (BA7)
MC8	14674248	11721307	184282	917157	503778	176465	88.29	3 Precuneus (BA7)
BA22	18257006	15377243	183980	869363	434721	68590	90.18	30 Cerebellar Grey Matter
BB22	16399421	13533001	154978	946841	310265	69695	88.46	30 Cerebellar Grey Matter
BC22	15208961	11968907	172746	998594	448342	99129	86.39	30 Cerebellar Grey Matter
CHB22	15252894	12893919	159363	476492	1127163	106708	94.88	30 Cerebellar Grey Matter
CHC22	23045664	19244785	244404	995413	1498994	181260	93.63	30 Cerebellar Grey Matter
CHD22	21825381	18587577	199738	595567	1569935	105339	94.88	30 Cerebellar Grey Matter
HA72	14847375	13381500	135327	532049	440587	82077	96.07	30 Cerebellar Grey Matter
HB72	15587968	13693453	154279	737552	475039	100013	94.57	30 Cerebellar Grey Matter
HC72	15123247	12963898	169136	807954	512321	121950	93.3	30 Cerebellar Grey Matter
HD72	17089154	15059535	180552	753842	592476	89925	95.12	30 Cerebellar Grey Matter
MA19	25060170	19918670	318225	2054155	646077	322700	88.07	30 Cerebellar Grey Matter
MB19	17359735	13355535	163577	1289830	431460	185208	84.61	30 Cerebellar Grey Matter
MC19	15788119	12552022	170205	845389	577483	150945	87.39	30 Cerebellar Grey Matter
BA38	16904085	14284091	209495	709930	696922	117088	92.31	31 Putamen
BB38	19571600	15641345	194050	1250188	498689	108371	86.93	31 Putamen
BC38	17527159	13468801	268673	961691	1340935	190096	89.31	31 Putamen
CHB38	19665870	16270544	201520	747666	1575015	175864	94.12	31 Putamen
CHC38	20547007	17005010	209119	709427	1724449	190289	94.36	31 Putamen
CHD38	18961622	15523454	185199	859389	1444180	154756	93.13	31 Putamen
HA23	17824516	15913070	171809	718472	490024	107907	95.31	31 Putamen
HB23	19734551	17176772	212922	1027823	642813	180896	94.44	31 Putamen
HC23	15848821	14050613	153237	691818	450804	121618	95.03	31 Putamen
HD23	14250040	12594111	134228	628651	416033	101867	94.8	31 Putamen
MA38	17162722	13189703	215319	1348161	585777	270008	86.23	31 Putamen
MB38	13751575	10277653	130635	942975	394152	180413	82.64	31 Putamen
MC38	16014914	11720710	192620	981864	885397	236266	83.72	31 Putamen
BA37	15990014	13260267	202843	805720	627580	121216	91.02	32 Caudate
BB37	14371128	11944767	145321	791799	393214	82400	89.91	32 Caudate
BC37	16343983	12677249	272038	796665	1276275	185353	90.04	32 Caudate
CHB37	19723543	16470051	206165	628534	1593285	165444	94.64	32 Caudate
CHC37	14502993	12013434	161407	478020	1307730	145860	95.11	32 Caudate
CHD37	17384920	14625366	159901	529485	1355034	98983	94.65	32 Caudate
HA14	21159459	19010098	199230	856406	568309	122110	95.78	32 Caudate
HB14	14785329	13035675	141633	579164	581085	112012	95.39	32 Caudate
HC14	14484571	12967281	131086	575401	425170	83392	95.64	32 Caudate
HD14	17700989	15939019	175318	609154	562120	93825	96.2	32 Caudate
MA37	17184988	13224135	206358	1404801	572229	254496	86.31	32 Caudate
MB37	15842676	11636470	152392	1116366	452134	255595	81.6	32 Caudate
MC37	17600181	13180677	216283	1074764	896152	255990	84.99	32 Caudate
BA41	14998902	12798900	188435	643887	597382	108304	93.08	33 Nucleus Accumbens
BB41	17842155	14940776	173965	870252	491101	109749	90.21	33 Nucleus Accumbens
BC41	18306584	14519029	280084	897146	1296595	193257	90.9	33 Nucleus Accumbens
CHB41	19943170	16642096	200963	678083	1566989	196382	94.5	33 Nucleus Accumbens
CHC41	20907476	17213499	207121	759609	1750385	251920	94.11	33 Nucleus Accumbens
CHD41	17239419	14515697	162685	505069	1402450	100696	95.04	33 Nucleus Accumbens
HA15	18394420	16398598	172159	753533	507515	124956	95.23	33 Nucleus Accumbens
HB15	15663737	13976591	149816	663298	470093	89667	95.59	33 Nucleus Accumbens
HC15	16056381	14182012	152792	757260	446246	150682	94.88	33 Nucleus Accumbens
HD15	17427252	15622674	155285	647260	569871	126682	96.03	33 Nucleus Accumbens
MA41	16094835	12146676	222387	1322940	574883	287480	85.43	33 Nucleus Accumbens
MB41	15884868	11677463	148604	1164284	432826	218865	81.53	33 Nucleus Accumbens
MC41	19062473	14401240	226338	1092363	972578	255122	85.37	33 Nucleus Accumbens
BA8	15551021	12694587	166917	844790	496868	90558	88.91	4 Cingulate Posterior (BA31)
BB8	17681426	14392189	175982	1119736	412735	104073	88.19	4 Cingulate Posterior (BA31)
BC8	20906263	15903861	362254	1563662	1217155	286441	88.05	4 Cingulate Posterior (BA31)
CHB8	16995948	14295585	178895	519298	1323452	106205	94.79	4 Cingulate Posterior (BA31)
CHC8	17778996	15086121	175242	531964	1310269	111390	95.02	4 Cingulate Posterior (BA31)
CHD8	15758638	13261047	149718	449233	1148154	78268	94.06	4 Cingulate Posterior (BA31)
HA40	19286664	17384213	181499	667288	541538	104793	95.89	4 Cingulate Posterior (BA31)
HB40	18298876	15741876	184990	869082	845075	187686	94.54	4 Cingulate Posterior (BA31)
HC40	15420318	13355846	160683	853159	439997	204842	93.94	4 Cingulate Posterior (BA31)
HD40	15144115	13634568	136250	459198	434142	81842	95.58	4 Cingulate Posterior (BA31)
MA7	16714155	13613129	192947	1076278	477141	196084	89.26	4 Cingulate Posterior (BA31)
MB7	18103049	13877829	185831	1320513	464382	233890	84.55	4 Cingulate Posterior (BA31)
MC7	15790087	12166717	222122	1166954	573183	245989	86.56	4 Cingulate Posterior (BA31)
BA6	17852705	15053211	210392	900511	518565	99853	91.2	5 Premotor (BA6)
BB6	14118939	10994126	138061	994531	373829	157247	85.57	5 Premotor (BA6)
BC6	15069774	11538648	186967	901809	895704	143123	87.22	5 Premotor (BA6)
CHB6	16906556	14193645	166947	478733	1366889	104276	94.75	5 Premotor (BA6)
CHC6	15871695	13245861	163157	564038	1248786	131041	94.54	5 Premotor (BA6)
CHD6	20155735	17058759	187380	539221	1604420	109556	95.13	5 Premotor (BA6)
HA19	18752763	16920794	184367	676962	509633	103054	96.01	5 Premotor (BA6)
HB19	17754765	15724695	171905	670974	586720	118537	95.06	5 Premotor (BA6)
HC19	13917573	12069103	147669	764177	394599	141958	93.87	5 Premotor (BA6)
HD19	20007678	17985506	188352	722386	603623	106172	95.92	5 Premotor (BA6)
MA6	14959779	11788866	173202	1245163	427644	193380	87.63	5 Premotor (BA6)
MB6	16862749	12770243	149587	1137294	468975	169963	83.27	5 Premotor (BA6)
MC6	15739623	12444925	205007	1110004	540452	208821	87.99	5 Premotor (BA6)
BA30	17316543	14446966	192631	928491	479530	86177	90.24	6 1ary Somatosensory (BA3/1/2)
BB30	15341713	12990292	150857	773256	373102	66628	90.83	6 1ary Somatosensory (BA3/1/2)
BC30	20116307	15482302	321390	1495618	957976	244141	87.65	6 1ary Somatosensory (BA3/1/2)
CHB30	19967219	16640974	195696	594678	1701522	162072	94.74	6 1ary Somatosensory (BA3/1/2)
CHC30	21972092	18590724	224861	675506	1642755	169255	95.03	6 1ary Somatosensory (BA3/1/2)
CHD30	21445029	17990308	207944	686026	1569185	124447	94.07	6 1ary Somatosensory (BA3/1/2)
HA29	18628644	16868231	165889	647006	529026	70698	96.21	6 1ary Somatosensory (BA3/1/2)
HB29	17844218	15243557	185286	998099	580809	183424	93.03	6 1ary Somatosensory (BA3/1/2)
HC29	17603426	15317897	174165	1001225	463878	190066	94.02	6 1ary Somatosensory (BA3/1/2)
HD29	14950533	13399167	139622	580644	400547	89724	95.48	6 1ary Somatosensory (BA3/1/2)
MA30	16266844	13048144	197996	1145462	479127	200005	88.51	6 1ary Somatosensory (BA3/1/2)
MB30	14638002	11376117	147307	961634	384815	149343	85.15	6 1ary Somatosensory (BA3/1/2)
MC30	16993115	13607442	219079	1139358	556528	213042	88.62	6 1ary Somatosensory (BA3/1/2)
BA31	17365889	14794964	197084	785324	534415	91937	91.93	7 1ary Auditory (BA41/42)
BB31	21117989	16997225	213162	1314221	584945	124822	87.67	7 1ary Auditory (BA41/42)
BC31	17387640	13396544	292952	1077750	1042367	220006	88.46	7 1ary Auditory (BA41/42)
CHB31	17359403	14597676	167778	548317	1333431	117356	94.66	7 1ary Auditory (BA41/42)
CHC31	16786393	14062201	177616	557223	1354314	147097	95	7 1ary Auditory (BA41/42)
CHD31	22536863	18849031	211181	585059	1850860	121977	94.35	7 1ary Auditory (BA41/42)
HA39	15324196	13741189	160576	571990	410532	71822	95.5	7 1ary Auditory (BA41/42)
HB39	18691549	16538718	179002	873335	557200	111439	95.06	7 1ary Auditory (BA41/42)
HC39	16965706	14026119	177474	832055	1276996	167939	94.19	7 1ary Auditory (BA41/42)
HD39	20125348	18275563	164972	637957	654999	121485	96.77	7 1ary Auditory (BA41/42)
MA31	16837917	13360022	193008	1336124	500539	220904	88.09	7 1ary Auditory (BA41/42)
MB31	12788124	9755037	106543	762883	355827	124167	83.37	7 1ary Auditory (BA41/42)
MC31	13218423	10425110	163827	903751	461375	153232	87.6	7 1ary Auditory (BA41/42)
BA29	19301159	15947087	217307	1200636	546952	108102	89.97	8 1ary Motor (BA4)
BB29	18662979	15123711	180361	1105772	493656	130502	87.96	8 1ary Motor (BA4)
BC29	17112855	13322201	271570	1248657	857582	207410	88.7	8 1ary Motor (BA4)
CHB29	15257596	12644860	158012	472467	1355625	140471	94.81	8 1ary Motor (BA4)
CHC29	17007398	14402072	179484	519099	1349966	134663	95.6	8 1ary Motor (BA4)
CHD29	22478075	18882378	225381	705938	1663607	132103	94.27	8 1ary Motor (BA4)
HA28	16468295	14753849	154230	612482	462967	91985	95.48	8 1ary Motor (BA4)
HB28	12420524	10883180	120984	541000	422758	100105	94.58	8 1ary Motor (BA4)
HC28	14905658	13081819	147314	708249	404024	165255	94.39	8 1ary Motor (BA4)
HD28	15596585	14004819	143134	569658	457138	76421	95.71	8 1ary Motor (BA4)
MA29	16292522	12814239	184991	1308435	507311	222699	87.6	8 1ary Motor (BA4)
MB29	13807149	10458606	125489	979313	370148	148400	83.42	8 1ary Motor (BA4)
MC29	14010417	11001364	183395	998442	480088	188320	87.49	8 1ary Motor (BA4)
BA9	18531855	15508470	218165	1016905	578370	114552	91.04	9 1ary Visual (BA17)
BB9	13396803	10962729	128352	807769	331401	67526	88.53	9 1ary Visual (BA17)
BC9	15426379	11546272	260832	1120745	903871	193723	86.66	9 1ary Visual (BA17)
CHB9	18005366	15161204	175492	524923	1405751	104517	94.73	9 1ary Visual (BA17)
CHC9	15596048	13122917	157331	498245	1229664	120249	95.02	9 1ary Visual (BA17)
CHD9	19310955	16138181	187177	655134	1422427	119325	93.91	9 1ary Visual (BA17)
HA66	16157913	14603984	160240	532632	469349	75040	96.16	9 1ary Visual (BA17)
HB66	13263834	11578457	138794	643120	438626	126217	94.55	9 1ary Visual (BA17)
HC66	14180273	12126792	154734	857252	432175	139969	93.17	9 1ary Visual (BA17)
HD66	17120885	15166739	166946	679626	563350	107811	95.15	9 1ary Visual (BA17)
MA9	15626663	12669265	175217	1105532	428051	157390	88.98	9 1ary Visual (BA17)
MB9	16580195	12853811	173721	1203346	411448	183705	85.24	9 1ary Visual (BA17)
MC9	16115711	12423564	221465	1335540	544758	291059	86.89	9 1ary Visual (BA17)

## Sheet: sn RNA-seq
Library	Number of reads	Average reads per cell
ACC1	185773966	105149
ACC2a	194645959	21609
ACC2b	194447869	23279
ACC3a	193185749	23406
ACC3b	205120445	35208
CN1a	171043766	13295
CN1b	176738806	15123
CN2a	173082579	27263
CN2b	178836874	27911
CN3a	152131105	28921
CN3b	155516920	28657
CER1a	172989469	6189
CER1b	186539346	7688
CER2a	175457018	19845
CER2b	201173013	22186
CER3a	199930413	76189
CER3b	165040296	65442
