# Supplementary material for: Single-cell-resolution transcriptome map of human, chimpanzee, bonobo, and macaque brains
Source: HighWire-hosted journal article supplement (doi:10.1101/gr.256958.119), 2020-05-01
Supplement: Supplemental_Table_S9.xlsx [file Supplemental_Table_S9.xlsx]

## Sheet: Sheet1
Table S9. Matching brain regions between Allen Human Brain Atlas and our study.
Brain region in our study	Brain region in Allen Brain Atlas
1 Supramarginal (BA40)	BA40a.Anterior_Supramarginal_Ctx
1 Supramarginal (BA40)	BA40p.Supramarginal_Gyrus_Posterior
2 2ary Auditory (BA22)	BA22a.2ary_Auditory._language_processing
2 2ary Auditory (BA22)	BA22p.2ary_Auditory_Ctx._Wernicke
3 Precuneus (BA7)	BA7m.Precuneus
4 Cingulate Posterior (BA31)	BA31.Posterior_Cingulate_Ctx
5 Premotor (BA6)	BA6a.Premotor_Ctx_Anterior_Lateral
5 Premotor (BA6)	BA6p.Premotor_Ctx_Posterior
6 1ary Somatosensory (BA3/1/2)	BA3.1.2.1ary_Somatosensory_Ctx
7 1ary Auditory (BA41/42)	BA41.42.1ary_Auditory_Ctx
8 1ary Motor (BA4)	BA4.1ary_Motor_Ctx
9 1ary Visual (BA17)	BA17a.Anterior_Striate_Ctx._1ary_Visual_Ctx
9 1ary Visual (BA17)	BA17p.Posterior_Striate_Ctx.1ary_Visual_Ctx
10 2ary Visual (BA18/19)	BA18.19a.NA
11 Cingulate Anterior (BA24)	BA24.Anterior_Cingulate_Ctx
12 Cingulate Anterior (BA32)	BA32.Anterior_Cingulate_Ctx
12 Cingulate Anterior (BA32)	BA32g.Cingulate_Cortex_Anterior_(Genu_of_CC)
13 Prefrontal (BA10)	BA10.Anterior_Prefrontal_Ctx
14 Inferior Temporal (BA20)	BA20a.visual_processing_recognition_memory
14 Inferior Temporal (BA20)	BA20p.visual_processing_recognition_memory
15 Insular Posterior Cortex	INSp.Insular_Cortex_Posterior
16 Dorsolateral Prefrontal (BA9)	BA9.Dorsolateral_Prefrontal_Ctx
17 Orbitofrontal (BA11)	BA11.Orbitofrontal_Ctx
18 Ventrolateral Prefrontal (BA44)	BA44.Ventrolateral_PreFrontal_Ctx.Broca
19 Amygdala	AMG.Amygdala
20 Entorhinal Cortex	ENTCTX.Entorhinal_Cortex
21 Hippocampus	CA3.DG.Hipocampus.CA3.Dentate_Gyrus
22 Hypothalamus	HYP.Hypothalamus
23 Thalamus	MDTH.Medial_Dorsal_Thalamus
23 Thalamus	VLTH.Ventral_Lateral_Thalamus
24 Corpus Callosum Anterior	CCa.Anterior_Corpus_Callosum
25 Corpus Callosum Posterior	CCp.Posterior_Corpus_Callosum
26 Internal Capsule
27 Globus Pallidus	GP.Globus_Pallidus
28 Cerebellar White Matter
29 Substantia Nigra	SN.Substantia_Nigra
30 Cerebellar Grey Matter
31 Putamen	PUT.Putamen
32 Caudate	CAUD.Caudate
33 Nucleus Accumbens	NACC.Striatum.Nucleus_Accumbens
