# Supplementary material for: Single-cell-resolution transcriptome map of human, chimpanzee, bonobo, and macaque brains
Source: HighWire-hosted journal article supplement (doi:10.1101/gr.256958.119), 2020-05-01
Supplement: Supplemental_Table_S10.xlsx [file Supplemental_Table_S10.xlsx]

## Sheet: Sheet1
Table S10. Number of nuclei with at least 500 unique detected molecules, per species per region.
	rheMac8	panTro5	panPan2	hg38
ACC1	158	172	172	814
ACC2a	2959	1095	1588	2269
ACC2b	2769	996	1431	2161
ACC3a	1566	856	835	2711
ACC3b	1062	620	592	1837	26663	0.249143
Cer1a	649	799	4163	11262
Cer1b	489	669	3505	9994
Cer2a	1764	1115	2353	249
Cer2b	1839	1175	2385	261
Cer3a	835	151	6	162
Cer3b	701	113	1	278	44918	0.41972
CN1a	1795	806	4563	2344
CN1b	1549	716	4201	2174
CN2a	1733	710	1217	1015
CN2b	1704	744	1300	960
CN3a	1438	327	1219	895
CN3b	1420	391	1303	914	35438	0.331137
	24430	11455	30834	40300
ACC	8514	3739	4618	9792
Cer	6277	4022	12413	22206
CN	9639	3694	13803	8302	107019
	0.228277	0.107037	0.288117	0.376569
	500 UMI
